# Supplementary material
Source: publisher figshare collection journal article supplement (https://tandf.figshare.com/articles/dataset/_/12854117)
Supplement: Supplementary file 1 [file 1]

Supplementary Table 2. LA–ICP–MS U–Pb data of zircons from the Qiaotou Formation, Liaoning and Jilin Provinces

| Sample No.                                      | Pb    | Th    | U     | Th/U      | Pb     | <sup>207</sup> Pb/ <sup>206</sup> Pb | <sup>207</sup> Pb/ <sup>206</sup> Pb | <sup>207</sup> Pb/ <sup>235</sup> U | <sup>207</sup> Pb/ <sup>235</sup> U | <sup>206</sup> Pb/ <sup>238</sup> U | <sup>206</sup> Pb/ <sup>238</sup> U | rho    | <sup>207</sup> Pb/ <sup>206</sup> Pb | <sup>207</sup> Pb/ <sup>206</sup> Pb | <sup>207</sup> Pb/ <sup>235</sup> U | <sup>207</sup> Pb/ <sup>235</sup> U | <sup>206</sup> Pb/ <sup>238</sup> U | <sup>206</sup> Pb/ <sup>238</sup> U | Disconcordance |
|-------------------------------------------------|-------|-------|-------|-----------|--------|--------------------------------------|--------------------------------------|-------------------------------------|-------------------------------------|-------------------------------------|-------------------------------------|--------|--------------------------------------|--------------------------------------|-------------------------------------|-------------------------------------|-------------------------------------|-------------------------------------|----------------|
|                                                 | Total | 232   | 238   | Common Pb | Ratio  | 1sigma                               | Ratio                                | 1sigma                              | Ratio                               | 1sigma                              | Age (Ma)                            |        | 1sigma                               | Age (Ma)                             | 1sigma                              | Age (Ma)                            | 1sigma                              |                                     |                |
| Sample17DL02-1 (38°54'45.10"N , 121°08'13.19"E) |       |       |       |           |        |                                      |                                      |                                     |                                     |                                     |                                     |        |                                      |                                      |                                     |                                     |                                     |                                     |                |
| Detrital zircons                                |       |       |       |           |        |                                      |                                      |                                     |                                     |                                     |                                     |        |                                      |                                      |                                     |                                     |                                     |                                     |                |
| 17DL02-1-01                                     | 217   | 122.7 | 133.9 | 0.92      | 0.0000 | 0.1014                               | 0.0017                               | 3.9571                              | 0.0750                              | 0.2842                              | 0.0046                              | 0.8583 | 1650                                 | 29.63                                | 1625                                | 15.39                               | 1612                                | 23.21                               | 2.3            |
| 17DL02-1-02                                     | 185   | 98.9  | 145.4 | 0.68      | 0.0000 | 0.0990                               | 0.0016                               | 3.9857                              | 0.0955                              | 0.2915                              | 0.0046                              | 0.6553 | 1606                                 | 29.78                                | 1631                                | 19.49                               | 1649                                | 22.87                               | -2.6           |
| 17DL02-1-03                                     | 381   | 289   | 268   | 1.08      | 11.00  | 0.0862                               | 0.0013                               | 2.5813                              | 0.0597                              | 0.2170                              | 0.0038                              | 0.7649 | 1343                                 | 25.00                                | 1295                                | 16.95                               | 1266                                | 20.34                               | 6.0            |
| 17DL02-1-04                                     | 439   | 249   | 340   | 0.73      | 0.0000 | 0.0979                               | 0.0012                               | 3.8691                              | 0.1018                              | 0.2858                              | 0.0060                              | 0.8035 | 1587                                 | 23.92                                | 1607                                | 21.27                               | 1621                                | 30.32                               | -2.1           |
| 17DL02-1-05                                     | 235   | 231   | 84.2  | 2.74      | 17.0   | 0.0787                               | 0.0019                               | 2.0532                              | 0.0559                              | 0.1897                              | 0.0033                              | 0.6449 | 1165                                 | 47.68                                | 1133                                | 18.60                               | 1120                                | 18.06                               | 4.0            |
| 17DL02-1-06                                     | 161   | 97.7  | 89.4  | 1.09      | 0.0000 | 0.0985                               | 0.0016                               | 3.9314                              | 0.0839                              | 0.2903                              | 0.0054                              | 0.8653 | 1595                                 | 31.48                                | 1620                                | 17.31                               | 1643                                | 26.80                               | -2.9           |
| 17DL02-1-07                                     | 120   | 95.9  | 107.5 | 0.89      | 23.8   | 0.0787                               | 0.0014                               | 2.2388                              | 0.0500                              | 0.2064                              | 0.0033                              | 0.7064 | 1165                                 | 35.95                                | 1193                                | 15.69                               | 1210                                | 17.40                               | -3.7           |
| 17DL02-1-08                                     | 133   | 78.7  | 86.0  | 0.92      | 42.0   | 0.0966                               | 0.0017                               | 3.6838                              | 0.0782                              | 0.2767                              | 0.0040                              | 0.6870 | 1559                                 | 33.33                                | 1568                                | 16.98                               | 1575                                | 20.38                               | -1.0           |
| 17DL02-1-09                                     | 156   | 135.5 | 116.1 | 1.17      | 0.0000 | 0.0810                               | 0.0015                               | 2.2349                              | 0.0498                              | 0.1999                              | 0.0027                              | 0.5993 | 1220                                 | 36.57                                | 1192                                | 15.64                               | 1175                                | 14.35                               | 3.9            |
| 17DL02-1-10                                     | 457   | 151.7 | 583   | 0.26      | 8.03   | 0.1097                               | 0.0013                               | 5.0026                              | 0.1100                              | 0.3302                              | 0.0065                              | 0.8935 | 1795                                 | 22.22                                | 1820                                | 18.64                               | 1839                                | 31.44                               | -2.4           |
| 17DL02-1-11                                     | 410   | 207   | 299   | 0.69      | 16.3   | 0.1077                               | 0.0014                               | 4.6846                              | 0.0920                              | 0.3150                              | 0.0048                              | 0.7745 | 1761                                 | 24.39                                | 1765                                | 16.48                               | 1765                                | 23.52                               | -0.2           |
| 17DL02-1-12                                     | 239   | 143.7 | 203   | 0.71      | 20.88  | 0.0933                               | 0.0015                               | 3.4062                              | 0.0742                              | 0.2643                              | 0.0040                              | 0.6966 | 1495                                 | 29.78                                | 1506                                | 17.12                               | 1512                                | 20.45                               | -1.1           |
| 17DL02-1-13                                     | 456   | 332   | 556   | 0.60      | 7.98   | 0.0813                               | 0.0010                               | 2.3951                              | 0.0564                              | 0.2134                              | 0.0044                              | 0.8670 | 1229                                 | 24.07                                | 1241                                | 16.90                               | 1247                                | 23.17                               | -1.4           |
| 17DL02-1-14                                     | 196   | 105.9 | 130.6 | 0.81      | 2.14   | 0.1048                               | 0.0016                               | 4.4190                              | 0.0883                              | 0.3060                              | 0.0046                              | 0.7485 | 1710                                 | 27.78                                | 1716                                | 16.58                               | 1721                                | 22.60                               | -0.6           |
| 17DL02-1-15                                     | 238   | 119.5 | 129.1 | 0.93      | 0.0000 | 0.1066                               | 0.0015                               | 4.9157                              | 0.0844                              | 0.3354                              | 0.0052                              | 0.8970 | 1743                                 | 27.01                                | 1805                                | 14.55                               | 1864                                | 24.97                               | -6.5           |
| 17DL02-1-16                                     | 194   | 173   | 118.1 | 1.47      | 25.6   | 0.0784                               | 0.0014                               | 2.1112                              | 0.0488                              | 0.1950                              | 0.0030                              | 0.6549 | 1158                                 | 35.18                                | 1152                                | 15.95                               | 1149                                | 15.95                               | 0.8            |
| 17DL02-1-17                                     | 107   | 60.8  | 75.8  | 0.80      | 4.449  | 0.0997                               | 0.0026                               | 3.9355                              | 0.1085                              | 0.2870                              | 0.0045                              | 0.5636 | 1620                                 | 48.15                                | 1621                                | 22.36                               | 1626                                | 22.36                               | -0.4           |
| 17DL02-1-18                                     | 317   | 177   | 237   | 0.75      | 17.5   | 0.1021                               | 0.0015                               | 4.3214                              | 0.0853                              | 0.3074                              | 0.0051                              | 0.8333 | 1662                                 | 26.55                                | 1697                                | 16.32                               | 1728                                | 24.94                               | -3.8           |
| 17DL02-1-19                                     | 194   | 128.2 | 124.1 | 1.03      | 22.83  | 0.0983                               | 0.0020                               | 3.4716                              | 0.0840                              | 0.2566                              | 0.0050                              | 0.8013 | 1592                                 | 37.34                                | 1521                                | 19.11                               | 1472                                | 25.55                               | 8.1            |
| 17DL02-1-21                                     | 149   | 55.7  | 183   | 0.30      | 0.0000 | 0.1066                               | 0.0015                               | 5.0135                              | 0.1125                              | 0.3412                              | 0.0065                              | 0.8452 | 1743                                 | 25.77                                | 1822                                | 19.04                               | 1893                                | 31.12                               | -7.9           |
| 17DL02-1-22                                     | 408   | 175   | 266   | 0.66      | 7.56   | 0.1188                               | 0.0015                               | 6.1267                              | 0.1282                              | 0.3742                              | 0.0068                              | 0.8634 | 1939                                 | 22.23                                | 1994                                | 18.32                               | 2049                                | 31.74                               | -5.4           |
| 17DL02-1-23                                     | 224   | 196   | 162   | 1.21      | 41.3   | 0.0772                               | 0.0014                               | 2.1367                              | 0.0413                              | 0.2016                              | 0.0030                              | 0.7657 | 1126                                 | 36.27                                | 1161                                | 13.39                               | 1184                                | 16.01                               | -4.9           |
| 17DL02-1-24                                     | 123.0 | 43.0  | 164.1 | 0.26      | 30.6   | 0.1083                               | 0.0015                               | 5.1132                              | 0.1045                              | 0.3432                              | 0.0059                              | 0.8383 | 1770                                 | 25.93                                | 1838                                | 17.41                               | 1902                                | 28.25                               | -6.9           |
| 17DL02-1-25                                     | 235   | 172   | 343   | 0.50      | 0.0000 | 0.0792                               | 0.0011                               | 2.2728                              | 0.0437                              | 0.2084                              | 0.0034                              | 0.8365 | 1189                                 | 27.78                                | 1204                                | 13.59                               | 1220                                | 17.90                               | -2.6           |
| 17DL02-1-26                                     | 394   | 276   | 206   | 1.34      | 31.8   | 0.0901                               | 0.0012                               | 3.2805                              | 0.0609                              | 0.2642                              | 0.0038                              | 0.7687 | 1428                                 | 21.30                                | 1476                                | 14.49                               | 1511                                | 19.25                               | -5.5           |
| 17DL02-1-27                                     | 261   | 124.3 | 280   | 0.44      | 37.6   | 0.1033                               | 0.0014                               | 4.1673                              | 0.1046                              | 0.2923                              | 0.0063                              | 0.8540 | 1684                                 | 24.08                                | 1668                                | 20.58                               | 1653                                | 31.26                               | 1.9            |
| 17DL02-1-28                                     | 304   | 78.9  | 605   | 0.13      | 5.35   | 0.1066                               | 0.0012                               | 4.4460                              | 0.0829                              | 0.3025                              | 0.0050                              | 0.8864 | 1743                                 | 20.06                                | 1721                                | 15.50                               | 1704                                | 24.76                               | 2.3            |
| 17DL02-1-29                                     | 318   | 253   | 341   | 0.74      | 18.00  | 0.0796                               | 0.0011                               | 2.2759                              | 0.0484                              | 0.2073                              | 0.0034                              | 0.7705 | 1187                                 | 23.61                                | 1205                                | 15.03                               | 1214                                | 18.16                               | -2.3           |
| 17DL02-1-30                                     | 186   | 108.6 | 128.3 | 0.85      | 12.66  | 0.0956                               | 0.0013                               | 3.7670                              | 0.0754                              | 0.2859                              | 0.0047                              | 0.8203 | 1540                                 | 21.76                                | 1586                                | 16.09                               | 1621                                | 23.53                               | -5.0           |
| 17DL02-1-31                                     | 710   | 354   | 583   | 0.61      | 0.0000 | 0.1023                               | 0.0012                               | 4.3698                              | 0.0781                              | 0.3098                              | 0.0049                              | 0.8847 | 1666                                 | 15.90                                | 1707                                | 14.81                               | 1740                                | 24.12                               | -4.2           |
| 17DL02-1-32                                     | 455   | 292   | 211   | 1.39      | 0.0000 | 0.0984                               | 0.0012                               | 3.8875                              | 0.0678                              | 0.2868                              | 0.0045                              | 0.8950 | 1594                                 | 22.22                                | 1611                                | 14.12                               | 1626                                | 22.44                               | -1.9           |
| 17DL02-1-33                                     | 307   | 196   | 187   | 1.05      | 0.0000 | 0.0966                               | 0.0014                               | 3.5699                              | 0.0714                              | 0.2678                              | 0.0039                              | 0.7353 | 1561                                 | 27.01                                | 1543                                | 15.89                               | 1530                                | 20.03                               | 2.1            |
| 17DL02-1-34                                     | 238.1 | 27.5  | 747   | 0.04      | 13.83  | 0.0923                               | 0.0010                               | 3.4364                              | 0.0652                              | 0.2699                              | 0.0046                              | 0.9015 | 1476                                 | 19.91                                | 1513                                | 14.97                               | 1540                                | 23.46                               | -4.2           |
| 17DL02-1-35                                     | 303   | 235   | 148.1 | 1.59      | 35.0   | 0.0851                               | 0.0014                               | 2.7298                              | 0.0642                              | 0.2323                              | 0.0038                              | 0.6987 | 1318                                 | 31.48                                | 1337                                | 17.51                               | 1347                                | 19.99                               | -2.1           |
| 17DL02-1-36                                     | 313   | 174   | 262   | 0.66      | 0.0000 | 0.0958                               | 0.0012                               | 3.8278                              | 0.0832                              | 0.2892                              | 0.0046                              | 0.7287 | 1544                                 | 24.08                                | 1599                                | 17.53                               | 1637                                | 22.92                               | -5.7           |

|             |       |       |       |      |        |        |        |        |        |        |        |        |      |       |      |       |      |       |      |
|-------------|-------|-------|-------|------|--------|--------|--------|--------|--------|--------|--------|--------|------|-------|------|-------|------|-------|------|
| 17DL02-1-37 | 358   | 204   | 274   | 0.74 | 26.4   | 0.0976 | 0.0013 | 3.8254 | 0.0799 | 0.2848 | 0.0052 | 0.8722 | 1589 | 25.92 | 1598 | 16.84 | 1615 | 26.04 | -1.6 |
| 17DL02-1-38 | 191   | 108.8 | 141.9 | 0.77 | 0.0000 | 0.1017 | 0.0015 | 4.0035 | 0.0967 | 0.2857 | 0.0057 | 0.8236 | 1655 | 27.78 | 1635 | 19.66 | 1620 | 28.51 | 2.2  |
| 17DL02-1-39 | 125   | 100.4 | 115.6 | 0.87 | 0.0000 | 0.0757 | 0.0016 | 2.0980 | 0.0550 | 0.2012 | 0.0033 | 0.6259 | 1087 | 36.58 | 1148 | 18.05 | 1182 | 17.73 | -8.0 |
| 17DL02-1-40 | 260   | 161   | 172   | 0.93 | 0.00   | 0.0967 | 0.0015 | 3.5990 | 0.0847 | 0.2698 | 0.0044 | 0.6962 | 1561 | 29.63 | 1549 | 18.72 | 1540 | 22.45 | 1.4  |
| 17DL02-1-41 | 344   | 155   | 330   | 0.47 | 8.34   | 0.1079 | 0.0015 | 4.6642 | 0.0988 | 0.3140 | 0.0057 | 0.8581 | 1765 | 25.62 | 1761 | 17.76 | 1760 | 28.02 | 0.3  |
| 17DL02-1-42 | 62.17 | 3.82  | 314   | 0.01 | 0.0000 | 0.0768 | 0.0012 | 2.0399 | 0.0460 | 0.1931 | 0.0039 | 0.8867 | 1117 | 29.63 | 1129 | 15.37 | 1138 | 20.85 | -1.9 |
| 17DL02-1-43 | 103   | 81.3  | 109.7 | 0.74 | 0.0000 | 0.0805 | 0.0018 | 2.1796 | 0.0556 | 0.1969 | 0.0033 | 0.6570 | 1209 | 43.36 | 1175 | 17.76 | 1159 | 17.77 | 4.4  |
| 17DL02-1-44 | 153   | 95.0  | 81.7  | 1.16 | 0.0000 | 0.0990 | 0.0017 | 3.7683 | 0.0892 | 0.2759 | 0.0040 | 0.6116 | 1606 | 32.25 | 1586 | 19.02 | 1571 | 20.20 | 2.2  |
| 17DL02-1-45 | 159   | 95.1  | 94.8  | 1.00 | 0.0000 | 0.1015 | 0.0016 | 4.0154 | 0.0947 | 0.2873 | 0.0054 | 0.7953 | 1651 | 29.94 | 1637 | 19.20 | 1628 | 27.00 | 1.4  |
| 17DL02-1-46 | 65.3  | 58.5  | 61.0  | 0.96 | 18.1   | 0.0787 | 0.0019 | 2.0208 | 0.0611 | 0.1863 | 0.0033 | 0.5893 | 1165 | 48.15 | 1123 | 20.54 | 1101 | 18.04 | 5.8  |
| 17DL02-1-47 | 98    | 79.4  | 87.0  | 0.91 | 17.1   | 0.0797 | 0.0019 | 2.1791 | 0.0553 | 0.1989 | 0.0030 | 0.5852 | 1191 | 47.06 | 1174 | 17.70 | 1169 | 15.91 | 1.8  |
| 17DL02-1-48 | 156   | 93.5  | 141.1 | 0.66 | 17.5   | 0.0929 | 0.0014 | 3.2398 | 0.0782 | 0.2531 | 0.0049 | 0.8096 | 1487 | 28.55 | 1467 | 18.75 | 1454 | 25.45 | 2.3  |
| 17DL02-1-49 | 284   | 156   | 215   | 0.72 | 0.0000 | 0.1009 | 0.0013 | 4.0350 | 0.0794 | 0.2901 | 0.0048 | 0.8460 | 1643 | 23.92 | 1641 | 16.06 | 1642 | 24.16 | 0.0  |
| 17DL02-1-50 | 172   | 154   | 88.4  | 1.74 | 7.44   | 0.0788 | 0.0016 | 2.1355 | 0.0497 | 0.1967 | 0.0030 | 0.6530 | 1169 | 39.35 | 1160 | 16.11 | 1158 | 16.11 | 0.9  |
| 17DL02-1-51 | 172   | 80.6  | 143.4 | 0.56 | 3.74   | 0.1117 | 0.0018 | 4.9413 | 0.1079 | 0.3208 | 0.0054 | 0.7702 | 1828 | 28.40 | 1809 | 18.48 | 1794 | 26.35 | 1.9  |
| 17DL02-1-52 | 277   | 144.6 | 291   | 0.50 | 39.7   | 0.1068 | 0.0013 | 4.3151 | 0.0661 | 0.2932 | 0.0035 | 0.7863 | 1746 | 23.30 | 1696 | 12.67 | 1657 | 17.61 | 5.4  |
| 17DL02-1-53 | 463   | 242   | 319   | 0.76 | 0.0000 | 0.1069 | 0.0014 | 4.5968 | 0.0875 | 0.3119 | 0.0049 | 0.8322 | 1747 | 22.99 | 1749 | 15.93 | 1750 | 24.31 | -0.2 |
| 17DL02-1-54 | 189   | 120.8 | 114.0 | 1.06 | 5.50   | 0.0970 | 0.0014 | 3.4870 | 0.0652 | 0.2606 | 0.0037 | 0.7663 | 1569 | 25.92 | 1524 | 14.79 | 1493 | 19.11 | 5.1  |
| 17DL02-1-55 | 284   | 171   | 179   | 0.96 | 0.0000 | 0.1015 | 0.0013 | 3.9199 | 0.0789 | 0.2799 | 0.0048 | 0.8565 | 1654 | 24.07 | 1618 | 16.32 | 1591 | 24.32 | 3.9  |
| 17DL02-1-56 | 162   | 101.7 | 87.6  | 1.16 | 3.87   | 0.0997 | 0.0019 | 3.7391 | 0.0875 | 0.2721 | 0.0044 | 0.6953 | 1618 | 35.18 | 1580 | 18.79 | 1551 | 22.46 | 4.3  |
| 17DL02-1-57 | 312   | 191   | 111.9 | 1.71 | 19.5   | 0.1051 | 0.0017 | 4.3407 | 0.1059 | 0.2993 | 0.0059 | 0.8043 | 1717 | 29.47 | 1701 | 20.17 | 1688 | 29.16 | 1.7  |
| 17DL02-1-58 | 114   | 95.2  | 110.5 | 0.86 | 0.0000 | 0.0808 | 0.0015 | 2.1916 | 0.0497 | 0.1970 | 0.0034 | 0.7524 | 1217 | 32.41 | 1178 | 15.82 | 1159 | 18.09 | 5.0  |
| 17DL02-1-59 | 218   | 123.8 | 163   | 0.76 | 13.81  | 0.1010 | 0.0014 | 4.0031 | 0.0732 | 0.2876 | 0.0044 | 0.8411 | 1643 | 26.08 | 1635 | 14.89 | 1629 | 22.15 | 0.8  |
| 17DL02-1-60 | 139.4 | 44.9  | 206   | 0.22 | 37.4   | 0.1074 | 0.0014 | 4.6163 | 0.0931 | 0.3111 | 0.0047 | 0.7562 | 1755 | 28.70 | 1752 | 16.87 | 1746 | 23.35 | 0.5  |
| 17DL02-1-61 | 579   | 388   | 222   | 1.75 | 0.0000 | 0.0997 | 0.0013 | 3.8452 | 0.0733 | 0.2797 | 0.0048 | 0.8925 | 1620 | 24.54 | 1602 | 15.41 | 1590 | 24.00 | 1.9  |
| 17DL02-1-62 | 208   | 113.3 | 142.0 | 0.80 | 42.0   | 0.1048 | 0.0015 | 4.3617 | 0.0915 | 0.3022 | 0.0054 | 0.8459 | 1710 | 27.78 | 1705 | 17.36 | 1702 | 26.55 | 0.5  |
| 17DL02-1-63 | 184   | 167   | 149.5 | 1.12 | 0.0000 | 0.0789 | 0.0015 | 2.0906 | 0.0498 | 0.1917 | 0.0028 | 0.6023 | 1170 | 31.02 | 1146 | 16.38 | 1131 | 14.89 | 3.5  |
| 17DL02-1-64 | 184   | 86.8  | 165   | 0.53 | 27.5   | 0.1111 | 0.0015 | 4.8009 | 0.0882 | 0.3132 | 0.0042 | 0.7231 | 1817 | 22.99 | 1785 | 15.48 | 1757 | 20.44 | 3.4  |
| 17DL02-1-65 | 290   | 140.9 | 246   | 0.57 | 0.0000 | 0.1083 | 0.0012 | 4.5651 | 0.0770 | 0.3060 | 0.0047 | 0.9017 | 1772 | 20.68 | 1743 | 14.10 | 1721 | 22.99 | 3.0  |
| 17DL02-1-66 | 199   | 190   | 105.5 | 1.80 | 0.0000 | 0.0795 | 0.0015 | 2.0476 | 0.0472 | 0.1868 | 0.0027 | 0.6324 | 1185 | 37.34 | 1131 | 15.75 | 1104 | 14.81 | 7.3  |
| 17DL02-1-67 | 153   | 87.2  | 98.3  | 0.89 | 58.8   | 0.1000 | 0.0018 | 3.9803 | 0.0931 | 0.2887 | 0.0045 | 0.6663 | 1633 | 33.33 | 1630 | 19.02 | 1635 | 22.53 | -0.1 |
| 17DL02-1-68 | 200   | 109.8 | 123.4 | 0.89 | 2.87   | 0.1027 | 0.0015 | 4.2713 | 0.0904 | 0.3020 | 0.0049 | 0.7708 | 1673 | 23.15 | 1688 | 17.45 | 1701 | 24.40 | -1.6 |
| 17DL02-1-69 | 92.7  | 75.7  | 86.4  | 0.88 | 40.8   | 0.0784 | 0.0015 | 2.1830 | 0.0563 | 0.2019 | 0.0034 | 0.6470 | 1167 | 37.81 | 1176 | 17.99 | 1185 | 18.08 | -1.6 |
| 17DL02-1-70 | 845   | 636   | 941   | 0.68 | 0.0000 | 0.0788 | 0.0010 | 2.3006 | 0.0453 | 0.2120 | 0.0033 | 0.8010 | 1166 | 24.07 | 1212 | 13.96 | 1239 | 17.80 | -5.9 |
| 17DL02-1-71 | 165   | 79.3  | 148.2 | 0.54 | 0.0000 | 0.1052 | 0.0017 | 4.4349 | 0.0946 | 0.3062 | 0.0047 | 0.7269 | 1717 | 29.47 | 1719 | 17.71 | 1722 | 23.45 | -0.3 |
| 17DL02-1-72 | 327   | 158.1 | 247   | 0.64 | 27.3   | 0.1070 | 0.0015 | 4.8265 | 0.1003 | 0.3271 | 0.0050 | 0.7420 | 1750 | 25.77 | 1790 | 17.53 | 1824 | 24.53 | -4.1 |
| 17DL02-1-73 | 239   | 145.9 | 165   | 0.88 | 0.0000 | 0.0969 | 0.0014 | 3.7266 | 0.0756 | 0.2791 | 0.0040 | 0.7085 | 1565 | 26.08 | 1577 | 16.28 | 1587 | 20.25 | -1.4 |
| 17DL02-1-74 | 126   | 75.4  | 86.2  | 0.87 | 50.4   | 0.0957 | 0.0020 | 3.7010 | 0.1022 | 0.2826 | 0.0074 | 0.9436 | 1543 | 39.35 | 1572 | 22.10 | 1604 | 37.02 | -3.9 |
| 17DL02-1-75 | 996   | 563   | 167   | 3.37 | 0.0000 | 0.1176 | 0.0017 | 5.6757 | 0.1228 | 0.3503 | 0.0061 | 0.8061 | 1921 | 25.62 | 1928 | 18.72 | 1936 | 29.18 | -0.8 |
| 17DL02-1-76 | 299   | 172   | 189   | 0.91 | 28.5   | 0.0977 | 0.0012 | 3.8993 | 0.0866 | 0.2899 | 0.0057 | 0.8898 | 1580 | 19.44 | 1614 | 17.99 | 1641 | 28.66 | -3.7 |
| 17DL02-1-77 | 498   | 366   | 691   | 0.53 | 0.0000 | 0.0773 | 0.0010 | 2.1995 | 0.0485 | 0.2071 | 0.0045 | 0.9760 | 1129 | 26.70 | 1181 | 15.43 | 1213 | 23.83 | -7.0 |
| 17DL02-1-78 | 376   | 242   | 157.5 | 1.54 | 0.0000 | 0.1011 | 0.0014 | 3.9382 | 0.0772 | 0.2831 | 0.0049 | 0.8785 | 1656 | 27.00 | 1622 | 15.92 | 1607 | 24.52 | 3.0  |

|                                                               |      |       |       |      |        |        |        |         |        |        |        |        |      |       |      |       |      |       |      |
|---------------------------------------------------------------|------|-------|-------|------|--------|--------|--------|---------|--------|--------|--------|--------|------|-------|------|-------|------|-------|------|
| 17DL02-1-79                                                   | 326  | 185   | 271   | 0.68 | 0.0000 | 0.0974 | 0.0013 | 3.7567  | 0.0795 | 0.2801 | 0.0051 | 0.8662 | 1576 | 24.84 | 1584 | 17.01 | 1592 | 25.88 | -1.0 |
| 17DL02-1-80                                                   | 144  | 63.1  | 99.7  | 0.63 | 7.06   | 0.1189 | 0.0017 | 5.9683  | 0.1195 | 0.3645 | 0.0061 | 0.8315 | 1940 | 25.62 | 1971 | 17.46 | 2004 | 28.68 | -3.2 |
| 17DL02-1-81                                                   | 317  | 169   | 241   | 0.70 | 15.54  | 0.1031 | 0.0013 | 4.3344  | 0.0896 | 0.3048 | 0.0050 | 0.7908 | 1680 | 22.99 | 1700 | 17.10 | 1715 | 24.63 | -2.0 |
| 17DL02-1-82                                                   | 96.1 | 81.0  | 90.3  | 0.90 | 0.0000 | 0.0814 | 0.0017 | 2.1892  | 0.0504 | 0.1953 | 0.0028 | 0.6170 | 1231 | 40.74 | 1178 | 16.05 | 1150 | 14.97 | 7.1  |
| 17DL02-1-83                                                   | 238  | 144.5 | 167   | 0.87 | 0.0000 | 0.0968 | 0.0017 | 3.7381  | 0.0845 | 0.2800 | 0.0042 | 0.6638 | 1565 | 32.25 | 1580 | 18.14 | 1591 | 21.18 | -1.7 |
| 17DL02-1-84                                                   | 278  | 262   | 161   | 1.63 | 0.0000 | 0.0776 | 0.0013 | 2.1063  | 0.0466 | 0.1969 | 0.0033 | 0.7643 | 1139 | 34.42 | 1151 | 15.25 | 1159 | 17.94 | -1.7 |
| 17DL02-1-85                                                   | 115  | 94.9  | 120.6 | 0.79 | 0.0000 | 0.0809 | 0.0016 | 2.2831  | 0.0606 | 0.2043 | 0.0037 | 0.6858 | 1220 | 35.03 | 1207 | 18.76 | 1199 | 19.92 | 1.8  |
| 17DL02-1-86                                                   | 268  | 76.9  | 121.7 | 0.63 | 10.99  | 0.1972 | 0.0022 | 14.9485 | 0.2773 | 0.5495 | 0.0094 | 0.9175 | 2803 | 18.51 | 2812 | 17.76 | 2823 | 38.95 | -0.7 |
| 17DL02-1-87                                                   | 123  | 108.4 | 106.4 | 1.02 | 0.0000 | 0.0783 | 0.0016 | 2.1628  | 0.0522 | 0.2005 | 0.0033 | 0.6823 | 1155 | 37.96 | 1169 | 16.77 | 1178 | 17.74 | -1.9 |
| 17DL02-1-88                                                   | 154  | 67.9  | 159   | 0.43 | 19.6   | 0.1078 | 0.0013 | 4.7952  | 0.0822 | 0.3227 | 0.0050 | 0.9093 | 1762 | 22.54 | 1784 | 14.45 | 1803 | 24.53 | -2.3 |
| 17DL02-1-89                                                   | 191  | 111.4 | 96.4  | 1.16 | 44.6   | 0.1065 | 0.0016 | 4.6974  | 0.0909 | 0.3200 | 0.0053 | 0.8616 | 1740 | 23.15 | 1767 | 16.24 | 1790 | 26.06 | -2.8 |
| 17DL02-1-90                                                   | 272  | 168   | 144.9 | 1.16 | 7.51   | 0.1015 | 0.0015 | 4.0872  | 0.0828 | 0.2915 | 0.0043 | 0.7333 | 1654 | 23.31 | 1652 | 16.56 | 1649 | 21.62 | 0.3  |
| 17DL02-1-91                                                   | 442  | 230   | 392   | 0.59 | 0.0000 | 0.1042 | 0.0012 | 4.2963  | 0.0860 | 0.2985 | 0.0053 | 0.8874 | 1702 | 20.52 | 1693 | 16.52 | 1684 | 26.33 | 1.1  |
| 17DL02-1-92                                                   | 539  | 325   | 348   | 0.94 | 0.0000 | 0.1017 | 0.0012 | 4.2578  | 0.1158 | 0.3033 | 0.0077 | 0.9324 | 1657 | 23.31 | 1685 | 22.40 | 1708 | 38.07 | -3.0 |
| 17DL02-1-93                                                   | 1751 | 1156  | 842   | 1.37 | 58.0   | 0.1000 | 0.0011 | 3.8951  | 0.0724 | 0.2826 | 0.0050 | 0.9499 | 1633 | 19.76 | 1613 | 15.07 | 1604 | 25.11 | 1.8  |
| 17DL02-1-94                                                   | 288  | 166.9 | 242   | 0.69 | 5.63   | 0.0992 | 0.0013 | 4.0548  | 0.1114 | 0.2960 | 0.0070 | 0.8642 | 1609 | 23.45 | 1645 | 22.40 | 1671 | 34.95 | -3.7 |
| 17DL02-1-95                                                   | 257  | 118.9 | 204   | 0.58 | 33.9   | 0.1216 | 0.0015 | 5.9076  | 0.1245 | 0.3520 | 0.0060 | 0.8027 | 1979 | 17.43 | 1962 | 18.35 | 1944 | 28.42 | 1.8  |
| <i>Rejected analyses (discordant &gt; 10%, error &gt; 5%)</i> |      |       |       |      |        |        |        |         |        |        |        |        |      |       |      |       |      |       |      |
| 17DL02-1-20                                                   | 78.5 | 66.4  | 72.5  | 0.91 | 8.44   | 0.0788 | 0.0022 | 2.1959  | 0.0655 | 0.2028 | 0.0033 | 0.5453 | 1169 | 49.54 | 1180 | 20.81 | 1190 | 17.68 | -1.8 |

**Sample17DL03-1 (38°48'40.42"N , 121°14'30.02"E)**

|                         |      |       |       |      |        |        |        |         |        |        |        |        |      |       |      |       |      |       |      |
|-------------------------|------|-------|-------|------|--------|--------|--------|---------|--------|--------|--------|--------|------|-------|------|-------|------|-------|------|
| <i>Detrital zircons</i> |      |       |       |      |        |        |        |         |        |        |        |        |      |       |      |       |      |       |      |
| 17DL03-1-01             | 146  | 73.0  | 151   | 0.48 | 3.20   | 0.1032 | 0.0015 | 4.1175  | 0.0887 | 0.2896 | 0.0055 | 0.8803 | 1683 | 27.01 | 1658 | 17.63 | 1639 | 27.45 | 2.7  |
| 17DL03-1-02             | 141  | 102.7 | 151   | 0.68 | 10.81  | 0.0802 | 0.0014 | 2.3827  | 0.0481 | 0.2156 | 0.0031 | 0.7086 | 1267 | 34.87 | 1237 | 14.47 | 1259 | 16.37 | 0.6  |
| 17DL03-1-03             | 394  | 242   | 439   | 0.55 | 0.134  | 0.0904 | 0.0010 | 3.0974  | 0.0561 | 0.2481 | 0.0037 | 0.8174 | 1435 | 20.53 | 1432 | 13.94 | 1429 | 18.99 | 0.5  |
| 17DL03-1-04             | 375  | 173   | 316   | 0.55 | 4.04   | 0.1122 | 0.0012 | 5.0829  | 0.0874 | 0.3282 | 0.0048 | 0.8419 | 1835 | 18.37 | 1833 | 14.65 | 1829 | 23.09 | 0.3  |
| 17DL03-1-05             | 151  | 100.9 | 63.5  | 1.59 | 10.03  | 0.0970 | 0.0015 | 3.7127  | 0.0822 | 0.2767 | 0.0042 | 0.6816 | 1569 | 28.08 | 1574 | 17.74 | 1575 | 21.10 | -0.4 |
| 17DL03-1-06             | 322  | 139.1 | 53.0  | 2.62 | 0.0000 | 0.1686 | 0.0025 | 10.8895 | 0.1884 | 0.4684 | 0.0064 | 0.7882 | 2544 | 24.23 | 2514 | 16.18 | 2477 | 28.08 | 2.7  |
| 17DL03-1-07             | 2231 | 2051  | 784   | 2.62 | 18.0   | 0.0791 | 0.0009 | 2.2034  | 0.0407 | 0.2017 | 0.0031 | 0.8305 | 1176 | 23.61 | 1182 | 12.91 | 1184 | 16.60 | -0.7 |
| 17DL03-1-08             | 78.8 | 44.1  | 101.3 | 0.44 | 24.0   | 0.0924 | 0.0014 | 3.0894  | 0.0661 | 0.2417 | 0.0035 | 0.6693 | 1477 | 29.17 | 1430 | 16.44 | 1395 | 17.98 | 5.8  |
| 17DL03-1-09             | 161  | 90.3  | 104.7 | 0.86 | 0.0000 | 0.0964 | 0.0016 | 3.9255  | 0.0821 | 0.2955 | 0.0049 | 0.7981 | 1567 | 31.95 | 1619 | 16.96 | 1669 | 24.55 | -6.1 |
| 17DL03-1-10             | 140  | 71.6  | 130.4 | 0.55 | 0.0000 | 0.1021 | 0.0015 | 4.1344  | 0.0767 | 0.2934 | 0.0041 | 0.7538 | 1663 | 32.41 | 1661 | 15.22 | 1658 | 20.47 | 0.3  |
| 17DL03-1-11             | 923  | 346   | 311   | 1.11 | 7.32   | 0.1757 | 0.0021 | 11.7739 | 0.2222 | 0.4849 | 0.0075 | 0.8158 | 2613 | 18.67 | 2587 | 17.75 | 2549 | 32.44 | 2.5  |
| 17DL03-1-12             | 153  | 52.8  | 47.1  | 1.12 | 0.0000 | 0.1918 | 0.0031 | 13.8414 | 0.2370 | 0.5231 | 0.0060 | 0.6720 | 2758 | 26.54 | 2739 | 16.32 | 2712 | 25.52 | 1.7  |
| 17DL03-1-13             | 1147 | 592   | 534   | 1.11 | 4.11   | 0.1153 | 0.0013 | 5.3955  | 0.0811 | 0.3392 | 0.0047 | 0.9280 | 1885 | 20.37 | 1884 | 12.94 | 1883 | 22.80 | 0.1  |
| 17DL03-1-14             | 131  | 105.2 | 121.9 | 0.86 | 7.59   | 0.0782 | 0.0015 | 2.1496  | 0.0450 | 0.1994 | 0.0026 | 0.6287 | 1151 | 33.18 | 1165 | 14.54 | 1172 | 14.14 | -1.8 |
| 17DL03-1-15             | 387  | 261   | 228   | 1.14 | 0.0000 | 0.0936 | 0.0012 | 3.4214  | 0.0619 | 0.2648 | 0.0042 | 0.8725 | 1502 | 23.61 | 1509 | 14.26 | 1514 | 21.32 | -0.8 |
| 17DL03-1-16             | 704  | 214   | 160   | 1.34 | 9.97   | 0.2400 | 0.0024 | 20.8616 | 0.3347 | 0.6298 | 0.0093 | 0.9233 | 3119 | 16.36 | 3132 | 15.69 | 3149 | 36.94 | -0.9 |
| 17DL03-1-17             | 197  | 118.8 | 247   | 0.48 | 5.16   | 0.0909 | 0.0012 | 3.0686  | 0.0620 | 0.2442 | 0.0036 | 0.7379 | 1444 | 24.54 | 1425 | 15.51 | 1408 | 18.89 | 2.5  |
| 17DL03-1-18             | 139  | 85.7  | 137.2 | 0.62 | 4.75   | 0.0904 | 0.0015 | 3.1796  | 0.0613 | 0.2549 | 0.0034 | 0.6845 | 1435 | 26.86 | 1452 | 14.92 | 1464 | 17.29 | -1.9 |
| 17DL03-1-19             | 446  | 185   | 111.1 | 1.66 | 0.0000 | 0.1640 | 0.0020 | 10.6926 | 0.1742 | 0.4723 | 0.0068 | 0.8869 | 2497 | 20.07 | 2497 | 15.23 | 2494 | 29.92 | 0.1  |

|             |       |       |       |      |        |        |        |         |        |        |        |        |      |       |      |       |      |       |      |
|-------------|-------|-------|-------|------|--------|--------|--------|---------|--------|--------|--------|--------|------|-------|------|-------|------|-------|------|
| 17DL03-1-20 | 272   | 219   | 422   | 0.52 | 6.95   | 0.0758 | 0.0010 | 1.9285  | 0.0360 | 0.1841 | 0.0027 | 0.7747 | 1100 | 25.92 | 1091 | 12.49 | 1089 | 14.49 | 1.0  |
| 17DL03-1-21 | 208   | 96.1  | 195   | 0.49 | 3.50   | 0.1073 | 0.0013 | 4.7765  | 0.0824 | 0.3223 | 0.0048 | 0.8703 | 1755 | 22.53 | 1781 | 14.54 | 1801 | 23.62 | -2.6 |
| 17DL03-1-22 | 288   | 212   | 110.8 | 1.91 | 0.0000 | 0.0909 | 0.0015 | 3.2459  | 0.0621 | 0.2588 | 0.0035 | 0.7010 | 1456 | 31.64 | 1468 | 14.89 | 1483 | 17.80 | -1.9 |
| 17DL03-1-23 | 88.1  | 55.4  | 80.3  | 0.69 | 16.8   | 0.0906 | 0.0016 | 3.0819  | 0.0578 | 0.2466 | 0.0030 | 0.6566 | 1439 | 31.95 | 1428 | 14.41 | 1421 | 15.73 | 1.3  |
| 17DL03-1-24 | 399   | 268   | 98.3  | 2.73 | 0.0000 | 0.1048 | 0.0018 | 4.2533  | 0.0841 | 0.2940 | 0.0040 | 0.6900 | 1722 | 31.64 | 1684 | 16.29 | 1661 | 19.99 | 3.7  |
| 17DL03-1-25 | 144   | 101.0 | 224   | 0.45 | 17.9   | 0.0771 | 0.0010 | 2.1237  | 0.0450 | 0.1990 | 0.0031 | 0.7353 | 1124 | 26.70 | 1157 | 14.66 | 1170 | 16.69 | -3.9 |
| 17DL03-1-26 | 242   | 129.1 | 448   | 0.29 | 0.0000 | 0.0847 | 0.0010 | 2.7567  | 0.0470 | 0.2353 | 0.0033 | 0.8169 | 1310 | 22.68 | 1344 | 12.75 | 1362 | 17.14 | -3.9 |
| 17DL03-1-27 | 184   | 140.4 | 75.2  | 1.87 | 0.0000 | 0.0962 | 0.0018 | 3.5630  | 0.1067 | 0.2679 | 0.0062 | 0.7736 | 1554 | 35.65 | 1541 | 23.76 | 1530 | 31.55 | 1.6  |
| 17DL03-1-28 | 112   | 70.8  | 106.5 | 0.67 | 0.0000 | 0.0915 | 0.0015 | 3.1995  | 0.0630 | 0.2527 | 0.0030 | 0.5988 | 1458 | 30.10 | 1457 | 15.26 | 1452 | 15.35 | 0.4  |
| 17DL03-1-29 | 199   | 141.9 | 234   | 0.61 | 0.0000 | 0.0817 | 0.0013 | 2.3967  | 0.0436 | 0.2125 | 0.0030 | 0.7640 | 1239 | 30.86 | 1242 | 13.05 | 1242 | 15.71 | -0.3 |
| 17DL03-1-30 | 488   | 393   | 406   | 0.97 | 0.0000 | 0.0823 | 0.0012 | 2.3952  | 0.0433 | 0.2106 | 0.0027 | 0.7172 | 1254 | 23.92 | 1241 | 12.97 | 1232 | 14.54 | 1.8  |
| 17DL03-1-31 | 662   | 278   | 108.9 | 2.55 | 0.0000 | 0.1670 | 0.0023 | 11.2706 | 0.1783 | 0.4892 | 0.0065 | 0.8340 | 2527 | 22.07 | 2546 | 14.86 | 2567 | 27.98 | -1.5 |
| 17DL03-1-32 | 411   | 229   | 258   | 0.89 | 2.95   | 0.1057 | 0.0013 | 4.4891  | 0.0743 | 0.3077 | 0.0043 | 0.8343 | 1728 | 23.61 | 1729 | 13.80 | 1729 | 20.98 | -0.1 |
| 17DL03-1-33 | 215   | 142.7 | 165   | 0.86 | 13.17  | 0.0940 | 0.0016 | 3.3409  | 0.0702 | 0.2574 | 0.0035 | 0.6544 | 1507 | 31.48 | 1491 | 16.44 | 1477 | 18.15 | 2.1  |
| 17DL03-1-34 | 1269  | 1035  | 1610  | 0.64 | 2.08   | 0.0755 | 0.0008 | 2.0315  | 0.0327 | 0.1947 | 0.0026 | 0.8294 | 1083 | 22.22 | 1126 | 10.97 | 1147 | 14.03 | -5.6 |
| 17DL03-1-35 | 107   | 36.3  | 39.7  | 0.92 | 12.38  | 0.1624 | 0.0027 | 11.2401 | 0.2115 | 0.5013 | 0.0055 | 0.5832 | 2481 | 27.63 | 2543 | 17.63 | 2619 | 23.66 | -5.3 |
| 17DL03-1-36 | 219   | 118.9 | 128.5 | 0.93 | 0.0000 | 0.1104 | 0.0016 | 4.8387  | 0.0859 | 0.3177 | 0.0040 | 0.7034 | 1806 | 21.76 | 1792 | 14.98 | 1779 | 19.42 | 1.5  |
| 17DL03-1-37 | 242   | 110.8 | 138.9 | 0.80 | 12.29  | 0.1228 | 0.0016 | 6.1568  | 0.1020 | 0.3633 | 0.0045 | 0.7543 | 1998 | 22.68 | 1998 | 14.54 | 1998 | 21.51 | 0.0  |
| 17DL03-1-38 | 285   | 167   | 189   | 0.89 | 12.43  | 0.0989 | 0.0014 | 3.9882  | 0.0775 | 0.2920 | 0.0042 | 0.7472 | 1606 | 20.22 | 1632 | 15.81 | 1652 | 21.17 | -2.8 |
| 17DL03-1-39 | 310   | 107.6 | 88.9  | 1.21 | 0.0000 | 0.1786 | 0.0022 | 13.4127 | 0.2488 | 0.5440 | 0.0076 | 0.7507 | 2640 | 20.22 | 2709 | 17.62 | 2800 | 31.66 | -5.7 |
| 17DL03-1-40 | 494   | 159.3 | 128.2 | 1.24 | 0.0000 | 0.2132 | 0.0027 | 17.6319 | 0.3055 | 0.5995 | 0.0078 | 0.7490 | 2931 | 20.68 | 2970 | 16.77 | 3028 | 31.40 | -3.2 |
| 17DL03-1-41 | 303   | 153.1 | 225   | 0.68 | 3.79   | 0.1103 | 0.0015 | 5.0402  | 0.1075 | 0.3307 | 0.0047 | 0.6680 | 1806 | 20.22 | 1826 | 18.11 | 1842 | 22.84 | -2.0 |
| 17DL03-1-42 | 205   | 142.7 | 194   | 0.73 | 11.70  | 0.0851 | 0.0014 | 2.7852  | 0.0617 | 0.2372 | 0.0034 | 0.6398 | 1317 | 33.33 | 1352 | 16.58 | 1372 | 17.54 | -4.0 |
| 17DL03-1-43 | 27.02 | 0.65  | 130.0 | 0.01 | 0.0000 | 0.0809 | 0.0016 | 2.3964  | 0.0563 | 0.2148 | 0.0034 | 0.6700 | 1220 | 38.42 | 1242 | 16.84 | 1254 | 17.95 | -2.7 |
| 17DL03-1-44 | 665   | 490   | 715   | 0.69 | 0.0000 | 0.0820 | 0.0011 | 2.5108  | 0.0444 | 0.2219 | 0.0028 | 0.7097 | 1256 | 27.00 | 1275 | 12.86 | 1292 | 14.69 | -2.8 |
| 17DL03-1-45 | 584   | 456   | 650   | 0.70 | 12.09  | 0.0769 | 0.0009 | 2.1503  | 0.0327 | 0.2026 | 0.0025 | 0.8156 | 1120 | 23.30 | 1165 | 10.58 | 1189 | 13.51 | -5.8 |
| 17DL03-1-46 | 60.57 | 0.45  | 301   | 0.00 | 0.0000 | 0.0812 | 0.0012 | 2.3487  | 0.0455 | 0.2096 | 0.0030 | 0.7459 | 1228 | 28.55 | 1227 | 13.83 | 1227 | 16.16 | 0.1  |
| 17DL03-1-47 | 181   | 122.6 | 85.4  | 1.43 | 20.7   | 0.0951 | 0.0017 | 3.6608  | 0.0809 | 0.2788 | 0.0044 | 0.7113 | 1531 | 33.34 | 1563 | 17.65 | 1585 | 22.10 | -3.4 |
| 17DL03-1-48 | 399   | 145.9 | 90.5  | 1.61 | 0.0000 | 0.1823 | 0.0024 | 13.6268 | 0.2301 | 0.5419 | 0.0076 | 0.8298 | 2674 | 20.83 | 2724 | 16.08 | 2791 | 31.78 | -4.2 |
| 17DL03-1-49 | 56.8  | 25.9  | 159.2 | 0.16 | 22.1   | 0.0779 | 0.0015 | 2.2788  | 0.0535 | 0.2119 | 0.0032 | 0.6499 | 1146 | 38.89 | 1206 | 16.59 | 1239 | 17.21 | -7.5 |
| 17DL03-1-50 | 715   | 556   | 565   | 0.98 | 0.0000 | 0.0810 | 0.0010 | 2.5058  | 0.0444 | 0.2239 | 0.0031 | 0.7871 | 1222 | 24.53 | 1274 | 12.90 | 1303 | 16.48 | -6.2 |
| 17DL03-1-51 | 259   | 153.6 | 492   | 0.31 | 13.23  | 0.0821 | 0.0010 | 2.4554  | 0.0499 | 0.2163 | 0.0035 | 0.7975 | 1248 | 19.44 | 1259 | 14.69 | 1262 | 18.60 | -1.1 |
| 17DL03-1-52 | 195   | 100.4 | 135.4 | 0.74 | 4.35   | 0.1088 | 0.0018 | 4.8041  | 0.0830 | 0.3210 | 0.0049 | 0.8752 | 1789 | 29.63 | 1786 | 14.57 | 1794 | 23.70 | -0.3 |
| 17DL03-1-53 | 657   | 210   | 303   | 0.69 | 6.03   | 0.1700 | 0.0020 | 12.1948 | 0.2095 | 0.5194 | 0.0073 | 0.8215 | 2558 | 19.29 | 2620 | 16.22 | 2697 | 31.13 | -5.2 |
| 17DL03-1-54 | 120   | 82.5  | 99.2  | 0.83 | 0.0000 | 0.0900 | 0.0017 | 3.0733  | 0.0640 | 0.2478 | 0.0038 | 0.7392 | 1428 | 35.19 | 1426 | 16.00 | 1427 | 19.73 | 0.1  |
| 17DL03-1-55 | 287   | 142.4 | 182   | 0.78 | 0.0000 | 0.1077 | 0.0013 | 5.0318  | 0.0996 | 0.3378 | 0.0052 | 0.7823 | 1761 | 22.23 | 1825 | 16.82 | 1876 | 25.23 | -6.1 |
| 17DL03-1-56 | 211   | 114.8 | 326   | 0.35 | 0.0000 | 0.0871 | 0.0011 | 2.9394  | 0.0528 | 0.2447 | 0.0038 | 0.8647 | 1362 | 24.08 | 1392 | 13.63 | 1411 | 19.69 | -3.5 |
| 17DL03-1-57 | 96.1  | 20.1  | 107.4 | 0.19 | 11.07  | 0.1632 | 0.0021 | 10.4164 | 0.2056 | 0.4621 | 0.0070 | 0.7683 | 2489 | 16.21 | 2473 | 18.36 | 2449 | 30.92 | 1.6  |
| 17DL03-1-58 | 353   | 209   | 195   | 1.07 | 4.17   | 0.1021 | 0.0014 | 4.2656  | 0.0763 | 0.3028 | 0.0041 | 0.7638 | 1662 | 25.16 | 1687 | 14.76 | 1705 | 20.49 | -2.5 |
| 17DL03-1-59 | 195   | 127.6 | 116.5 | 1.10 | 0.0000 | 0.0974 | 0.0016 | 3.6957  | 0.0745 | 0.2749 | 0.0038 | 0.6854 | 1576 | 31.17 | 1570 | 16.14 | 1566 | 19.22 | 0.6  |
| 17DL03-1-60 | 234   | 94.1  | 151.9 | 0.62 | 3.05   | 0.1334 | 0.0019 | 7.3044  | 0.1271 | 0.3972 | 0.0059 | 0.8550 | 2144 | 24.07 | 2149 | 15.61 | 2156 | 27.29 | -0.6 |
| 17DL03-1-61 | 599   | 164   | 392   | 0.42 | 1.87   | 0.1657 | 0.0021 | 11.5253 | 0.2022 | 0.5040 | 0.0073 | 0.8265 | 2517 | 20.98 | 2567 | 16.48 | 2631 | 31.35 | -4.3 |

|                                                  |        |       |       |      |        |        |        |         |        |        |        |        |      |       |      |       |      |       |       |
|--------------------------------------------------|--------|-------|-------|------|--------|--------|--------|---------|--------|--------|--------|--------|------|-------|------|-------|------|-------|-------|
| 17DL03-1-62                                      | 334    | 182   | 208   | 0.87 | 6.05   | 0.1069 | 0.0016 | 4.6326  | 0.0911 | 0.3140 | 0.0047 | 0.7586 | 1748 | 27.78 | 1755 | 16.46 | 1760 | 22.99 | -0.7  |
| 17DL03-1-63                                      | 478    | 166   | 227   | 0.73 | 8.68   | 0.1598 | 0.0020 | 10.5630 | 0.1686 | 0.4794 | 0.0061 | 0.7968 | 2453 | 22.07 | 2485 | 14.90 | 2525 | 26.60 | -2.8  |
| 17DL03-1-64                                      | 617    | 362   | 712   | 0.51 | 0.0000 | 0.0918 | 0.0010 | 3.2997  | 0.0566 | 0.2604 | 0.0033 | 0.7327 | 1463 | 20.53 | 1481 | 13.39 | 1492 | 16.74 | -1.9  |
| 17DL03-1-65                                      | 170.2  | 90.0  | 512   | 0.18 | 0.0000 | 0.0771 | 0.0010 | 1.9937  | 0.0359 | 0.1873 | 0.0024 | 0.6973 | 1124 | 26.70 | 1113 | 12.21 | 1107 | 12.79 | 1.6   |
| 17DL03-1-66                                      | 302    | 129.5 | 290   | 0.45 | 25.0   | 0.1150 | 0.0014 | 5.4046  | 0.0919 | 0.3406 | 0.0045 | 0.7768 | 1881 | 21.91 | 1886 | 14.63 | 1890 | 21.67 | -0.5  |
| 17DL03-1-67                                      | 554    | 345   | 432   | 0.80 | 19.1   | 0.0936 | 0.0012 | 3.4730  | 0.0617 | 0.2689 | 0.0037 | 0.7652 | 1502 | 23.46 | 1521 | 14.05 | 1535 | 18.59 | -2.2  |
| 17DL03-1-68                                      | 747    | 407   | 235   | 1.73 | 0.0000 | 0.1175 | 0.0014 | 5.7326  | 0.1118 | 0.3533 | 0.0053 | 0.7666 | 1920 | 20.53 | 1936 | 16.91 | 1950 | 25.19 | -1.5  |
| 17DL03-1-69                                      | 526    | 133.3 | 173   | 0.77 | 0.0000 | 0.2724 | 0.0032 | 24.6447 | 0.3584 | 0.6559 | 0.0064 | 0.6727 | 3320 | 18.21 | 3294 | 14.37 | 3251 | 25.04 | 2.1   |
| 17DL03-1-70                                      | 98.4   | 42.3  | 109.8 | 0.39 | 20.0   | 0.1105 | 0.0018 | 4.8314  | 0.1029 | 0.3168 | 0.0045 | 0.6637 | 1809 | 23.92 | 1790 | 17.97 | 1774 | 21.95 | 2.0   |
| 17DL03-1-71                                      | 118.5  | 58.6  | 116.6 | 0.50 | 1.99   | 0.1068 | 0.0017 | 4.5502  | 0.0886 | 0.3092 | 0.0044 | 0.7369 | 1746 | 28.09 | 1740 | 16.26 | 1737 | 21.87 | 0.5   |
| 17DL03-1-72                                      | 288    | 202   | 150.4 | 1.34 | 0.0000 | 0.0943 | 0.0016 | 3.3851  | 0.0751 | 0.2597 | 0.0031 | 0.5375 | 1515 | 33.03 | 1501 | 17.42 | 1488 | 15.87 | 1.7   |
| 17DL03-1-73                                      | 734    | 372   | 532   | 0.70 | 2.96   | 0.1084 | 0.0014 | 4.8981  | 0.0882 | 0.3278 | 0.0051 | 0.8681 | 1773 | 22.84 | 1802 | 15.24 | 1828 | 24.90 | -3.0  |
| 17DL03-1-74                                      | 370    | 257   | 152.5 | 1.68 | 5.35   | 0.0964 | 0.0015 | 3.6431  | 0.0785 | 0.2736 | 0.0041 | 0.6964 | 1567 | 29.63 | 1559 | 17.20 | 1559 | 20.80 | 0.5   |
| 17DL03-1-75                                      | 259    | 97.3  | 94.6  | 1.03 | 13.57  | 0.1601 | 0.0026 | 10.5833 | 0.2035 | 0.4797 | 0.0072 | 0.7824 | 2457 | 27.16 | 2487 | 17.92 | 2526 | 31.46 | -2.7  |
| 17DL03-1-76                                      | 511    | 335   | 725   | 0.46 | 6.81   | 0.0807 | 0.0010 | 2.4974  | 0.0490 | 0.2241 | 0.0036 | 0.8231 | 1217 | 24.07 | 1271 | 14.25 | 1303 | 19.07 | -6.7  |
| 17DL03-1-77                                      | 249    | 192   | 280   | 0.69 | 0.0000 | 0.0784 | 0.0012 | 2.2879  | 0.0447 | 0.2118 | 0.0035 | 0.8447 | 1167 | 31.48 | 1209 | 13.82 | 1238 | 18.60 | -5.8  |
| 17DL03-1-78                                      | 696    | 257   | 251   | 1.03 | 2.58   | 0.1627 | 0.0018 | 11.0795 | 0.1873 | 0.4931 | 0.0068 | 0.8205 | 2484 | 19.14 | 2530 | 15.84 | 2584 | 29.56 | -3.9  |
| 17DL03-1-80                                      | 221    | 98.2  | 260   | 0.38 | 0.93   | 0.1049 | 0.0014 | 4.4637  | 0.0831 | 0.3079 | 0.0045 | 0.7766 | 1722 | 25.46 | 1724 | 15.49 | 1731 | 21.96 | -0.5  |
| 17DL03-1-81                                      | 630    | 248   | 232   | 1.07 | 6.43   | 0.1534 | 0.0020 | 9.7453  | 0.1469 | 0.4599 | 0.0056 | 0.8148 | 2384 | 21.91 | 2411 | 13.98 | 2439 | 24.98 | -2.2  |
| 17DL03-1-82                                      | 221    | 115.1 | 144.3 | 0.80 | 0.0059 | 0.1076 | 0.0016 | 4.8198  | 0.0896 | 0.3244 | 0.0047 | 0.7724 | 1758 | 27.78 | 1788 | 15.68 | 1811 | 22.70 | -2.9  |
| 17DL03-1-83                                      | 108.02 | 3.91  | 176   | 0.02 | 17.7   | 0.1644 | 0.0020 | 11.4388 | 0.2206 | 0.5028 | 0.0081 | 0.8330 | 2502 | 20.37 | 2560 | 18.09 | 2626 | 34.68 | -4.7  |
| 17DL03-1-84                                      | 202    | 113.6 | 208   | 0.55 | 19.9   | 0.0950 | 0.0013 | 3.6271  | 0.0618 | 0.2763 | 0.0039 | 0.8301 | 1529 | 26.55 | 1555 | 13.60 | 1573 | 19.75 | -2.8  |
| 17DL03-1-85                                      | 483    | 158.3 | 287   | 0.55 | 0.0000 | 0.1557 | 0.0018 | 10.2283 | 0.1698 | 0.4752 | 0.0069 | 0.8748 | 2410 | 18.98 | 2456 | 15.45 | 2506 | 30.19 | -3.9  |
| 17DL03-1-86                                      | 186.2  | 39.5  | 414   | 0.10 | 0.0000 | 0.1038 | 0.0012 | 4.5099  | 0.0760 | 0.3144 | 0.0050 | 0.9469 | 1694 | 20.68 | 1733 | 14.06 | 1762 | 24.62 | -3.8  |
| 17DL03-1-87                                      | 323    | 236   | 95.8  | 2.46 | 11.59  | 0.0941 | 0.0020 | 3.4379  | 0.0815 | 0.2643 | 0.0039 | 0.6141 | 1511 | 38.89 | 1513 | 18.69 | 1512 | 19.65 | -0.1  |
| 17DL03-1-88                                      | 295    | 165   | 164   | 1.00 | 2.36   | 0.1080 | 0.0016 | 4.6993  | 0.0859 | 0.3146 | 0.0042 | 0.7316 | 1766 | 27.78 | 1767 | 15.36 | 1763 | 20.66 | 0.1   |
| 17DL03-1-89                                      | 176    | 97.9  | 270   | 0.36 | 0.0000 | 0.0842 | 0.0013 | 2.8591  | 0.0595 | 0.2454 | 0.0038 | 0.7453 | 1298 | 25.00 | 1371 | 15.68 | 1415 | 19.71 | -8.2  |
| 17DL03-1-90                                      | 535    | 402   | 516   | 0.78 | 0.0000 | 0.0808 | 0.0012 | 2.4651  | 0.0434 | 0.2208 | 0.0033 | 0.8586 | 1217 | 28.24 | 1262 | 12.76 | 1286 | 17.65 | -5.4  |
| 17DL03-1-91                                      | 237    | 185   | 226   | 0.82 | 1.39   | 0.0813 | 0.0014 | 2.3807  | 0.0515 | 0.2119 | 0.0034 | 0.7369 | 1228 | 33.79 | 1237 | 15.50 | 1239 | 17.99 | -0.9  |
| 17DL03-1-92                                      | 423    | 166   | 86.4  | 1.92 | 0.0000 | 0.1723 | 0.0025 | 11.8299 | 0.2185 | 0.4962 | 0.0066 | 0.7170 | 2580 | 19.44 | 2591 | 17.39 | 2597 | 28.35 | -0.7  |
| 17DL03-1-93                                      | 376    | 135.1 | 161   | 0.84 | 0.0000 | 0.1578 | 0.0019 | 10.1787 | 0.1621 | 0.4668 | 0.0065 | 0.8750 | 2432 | 20.21 | 2451 | 14.82 | 2469 | 28.63 | -1.5  |
| 17DL03-1-94                                      | 1019   | 389   | 245   | 1.59 | 14.16  | 0.1735 | 0.0020 | 12.0268 | 0.1939 | 0.5016 | 0.0071 | 0.8796 | 2592 | 18.83 | 2606 | 15.22 | 2621 | 30.57 | -1.1  |
| 17DL03-1-95                                      | 145    | 73.5  | 114.3 | 0.64 | 0.0000 | 0.1096 | 0.0021 | 4.6930  | 0.1025 | 0.3104 | 0.0045 | 0.6700 | 1792 | 30.56 | 1766 | 18.32 | 1743 | 22.36 | 2.8   |
| 17DL03-1-96                                      | 209    | 105.4 | 142.9 | 0.74 | 0.0000 | 0.1110 | 0.0017 | 4.9848  | 0.0958 | 0.3256 | 0.0053 | 0.8473 | 1817 | 27.78 | 1817 | 16.30 | 1817 | 25.80 | 0.0   |
| 17DL03-1-97                                      | 658    | 177   | 155.3 | 1.14 | 17.4   | 0.2682 | 0.0028 | 25.2426 | 0.3910 | 0.6814 | 0.0092 | 0.8705 | 3295 | 16.67 | 3318 | 15.30 | 3350 | 35.27 | -1.6  |
| 17DL03-1-98                                      | 320    | 181   | 225   | 0.80 | 0.0000 | 0.1039 | 0.0014 | 4.2387  | 0.0781 | 0.2953 | 0.0039 | 0.7255 | 1695 | 25.31 | 1682 | 15.17 | 1668 | 19.66 | 1.7   |
| 17DL03-1-99                                      | 625    | 214   | 291   | 0.73 | 0.0000 | 0.1661 | 0.0019 | 11.1577 | 0.1892 | 0.4863 | 0.0068 | 0.8253 | 2520 | 18.52 | 2536 | 15.89 | 2555 | 29.55 | -1.3  |
| 17DL03-1-100                                     | 253    | 98.6  | 59.8  | 1.65 | 7.89   | 0.1683 | 0.0027 | 11.3506 | 0.2131 | 0.4890 | 0.0066 | 0.7182 | 2543 | 26.55 | 2552 | 17.61 | 2566 | 28.58 | -0.9  |
| Rejected analyses (discordant > 10%, error > 5%) |        |       |       |      |        |        |        |         |        |        |        |        |      |       |      |       |      |       |       |
| 17DL03-1-79                                      | 293    | 234   | 398   | 0.59 | 14.25  | 0.0748 | 0.0012 | 2.1196  | 0.0513 | 0.2054 | 0.0041 | 0.8283 | 1063 | 31.48 | 1155 | 16.71 | 1204 | 22.02 | -11.7 |

Sample17DL04-1 (38°49'28.18"N , 121°23'19.65"E)

Detrital zircons

|             |     |      |      |      |        |        |        |         |        |        |        |        |      |       |      |       |      |       |      |
|-------------|-----|------|------|------|--------|--------|--------|---------|--------|--------|--------|--------|------|-------|------|-------|------|-------|------|
| 17DL04-1-01 | 279 | 113  | 93.1 | 1.22 | 0.0000 | 0.1780 | 0.0018 | 11.6248 | 0.1970 | 0.4736 | 0.0073 | 0.9035 | 2635 | 16.67 | 2575 | 15.94 | 2499 | 31.75 | 5.4  |
| 17DL04-1-02 | 206 | 149  | 88.4 | 1.69 | 0.0000 | 0.0989 | 0.0013 | 3.7513  | 0.0738 | 0.2754 | 0.0046 | 0.8470 | 1603 | 19.44 | 1582 | 15.81 | 1568 | 23.22 | 2.2  |
| 17DL04-1-03 | 733 | 501  | 536  | 0.93 | 0.0000 | 0.0979 | 0.0008 | 3.5414  | 0.0613 | 0.2627 | 0.0046 | 1.0213 | 1584 | 15.59 | 1537 | 13.75 | 1504 | 23.73 | 5.3  |
| 17DL04-1-04 | 420 | 331  | 213  | 1.56 | 6.77   | 0.0937 | 0.0010 | 3.2504  | 0.0563 | 0.2518 | 0.0041 | 0.9467 | 1502 | 20.37 | 1469 | 13.48 | 1448 | 21.26 | 3.8  |
| 17DL04-1-06 | 296 | 136  | 62.5 | 2.17 | 10.1   | 0.1694 | 0.0020 | 10.9974 | 0.1896 | 0.4709 | 0.0064 | 0.7924 | 2552 | 20.53 | 2523 | 16.14 | 2488 | 28.23 | 2.6  |
| 17DL04-1-07 | 147 | 106  | 70.9 | 1.49 | 0.0000 | 0.1026 | 0.0013 | 3.9574  | 0.0782 | 0.2794 | 0.0043 | 0.7714 | 1672 | 22.69 | 1626 | 16.05 | 1588 | 21.47 | 5.3  |
| 17DL04-1-08 | 157 | 105  | 131  | 0.80 | 0.0000 | 0.0978 | 0.0012 | 3.7594  | 0.0754 | 0.2792 | 0.0051 | 0.9089 | 1583 | 22.22 | 1584 | 16.13 | 1587 | 25.67 | -0.2 |
| 17DL04-1-09 | 315 | 260  | 151  | 1.73 | 0.0000 | 0.0915 | 0.0012 | 3.2332  | 0.0563 | 0.2569 | 0.0041 | 0.9182 | 1457 | 24.38 | 1465 | 13.54 | 1474 | 21.09 | -1.1 |
| 17DL04-1-10 | 175 | 67.3 | 457  | 0.15 | 14.9   | 0.0900 | 0.0011 | 2.9641  | 0.0464 | 0.2389 | 0.0035 | 0.9357 | 1428 | 23.31 | 1398 | 11.92 | 1381 | 18.23 | 3.4  |
| 17DL04-1-11 | 242 | 133  | 224  | 0.60 | 7.31   | 0.1050 | 0.0011 | 4.3440  | 0.0770 | 0.3000 | 0.0045 | 0.8404 | 1714 | 18.83 | 1702 | 14.68 | 1691 | 22.19 | 1.3  |
| 17DL04-1-12 | 183 | 105  | 139  | 0.76 | 0.0000 | 0.1080 | 0.0011 | 4.7272  | 0.0885 | 0.3176 | 0.0053 | 0.8908 | 1766 | 18.83 | 1772 | 15.73 | 1778 | 25.93 | -0.7 |
| 17DL04-1-13 | 265 | 161  | 413  | 0.39 | 0.0000 | 0.0884 | 0.0008 | 3.0252  | 0.0577 | 0.2483 | 0.0044 | 0.9273 | 1391 | 16.97 | 1414 | 14.60 | 1430 | 22.71 | -2.7 |
| 17DL04-1-14 | 212 | 199  | 229  | 0.87 | 0.0000 | 0.0789 | 0.0009 | 2.1332  | 0.0371 | 0.1963 | 0.0031 | 0.9214 | 1169 | 24.07 | 1160 | 12.06 | 1156 | 16.98 | 1.2  |
| 17DL04-1-15 | 363 | 209  | 293  | 0.71 | 0.0000 | 0.1058 | 0.0010 | 4.6013  | 0.0846 | 0.3157 | 0.0056 | 0.9699 | 1728 | 12.04 | 1750 | 15.39 | 1769 | 27.61 | -2.3 |
| 17DL04-1-16 | 146 | 75.4 | 157  | 0.48 | 23.4   | 0.1038 | 0.0011 | 4.2295  | 0.0609 | 0.2955 | 0.0034 | 0.8008 | 1694 | 20.06 | 1680 | 11.88 | 1669 | 16.98 | 1.5  |
| 17DL04-1-17 | 250 | 161  | 169  | 0.95 | 0.0000 | 0.1020 | 0.0010 | 4.0606  | 0.0785 | 0.2883 | 0.0046 | 0.8255 | 1661 | 18.52 | 1646 | 15.79 | 1633 | 23.04 | 1.7  |
| 17DL04-1-18 | 689 | 493  | 338  | 1.46 | 19.6   | 0.0994 | 0.0009 | 3.8717  | 0.0654 | 0.2825 | 0.0043 | 0.9004 | 1613 | 16.36 | 1608 | 13.68 | 1604 | 21.62 | 0.6  |
| 17DL04-1-19 | 161 | 99   | 141  | 0.70 | 21.6   | 0.0989 | 0.0014 | 3.9325  | 0.1860 | 0.2843 | 0.0089 | 0.6640 | 1603 | 27.78 | 1620 | 38.31 | 1613 | 44.83 | -0.6 |
| 17DL04-1-20 | 174 | 120  | 114  | 1.06 | 0.0000 | 0.0978 | 0.0011 | 3.6185  | 0.0587 | 0.2684 | 0.0037 | 0.8570 | 1583 | 22.07 | 1554 | 12.95 | 1533 | 18.99 | 3.3  |
| 17DL04-1-21 | 341 | 172  | 321  | 0.54 | 0.0000 | 0.1061 | 0.0009 | 4.6123  | 0.0748 | 0.3155 | 0.0049 | 0.9641 | 1733 | 16.67 | 1751 | 13.58 | 1768 | 24.18 | -2.0 |
| 17DL04-1-22 | 285 | 188  | 188  | 1.00 | 35.6   | 0.0997 | 0.0011 | 3.9497  | 0.0705 | 0.2874 | 0.0044 | 0.8661 | 1618 | 20.37 | 1624 | 14.51 | 1628 | 22.27 | -0.7 |
| 17DL04-1-23 | 446 | 294  | 293  | 1.00 | 0.0000 | 0.0995 | 0.0009 | 3.8656  | 0.0632 | 0.2814 | 0.0037 | 0.8135 | 1617 | 16.82 | 1607 | 13.24 | 1598 | 18.86 | 1.2  |
| 17DL04-1-24 | 372 | 284  | 233  | 1.22 | 8.14   | 0.0935 | 0.0010 | 3.1952  | 0.0607 | 0.2476 | 0.0041 | 0.8652 | 1498 | 19.29 | 1456 | 14.72 | 1426 | 21.03 | 5.1  |
| 17DL04-1-25 | 212 | 81.3 | 72.2 | 1.13 | 0.0000 | 0.1877 | 0.0017 | 13.2672 | 0.2249 | 0.5127 | 0.0083 | 0.9508 | 2724 | 13.73 | 2699 | 16.11 | 2668 | 35.24 | 2.1  |
| 17DL04-1-28 | 486 | 337  | 298  | 1.13 | 0.0000 | 0.1008 | 0.0010 | 3.7794  | 0.0612 | 0.2722 | 0.0045 | 1.0321 | 1640 | 18.21 | 1588 | 13.04 | 1552 | 23.06 | 5.7  |
| 17DL04-1-29 | 280 | 174  | 230  | 0.76 | 2.40   | 0.1008 | 0.0010 | 3.9860  | 0.0673 | 0.2865 | 0.0041 | 0.8501 | 1640 | 18.98 | 1631 | 13.75 | 1624 | 20.62 | 1.0  |
| 17DL04-1-30 | 534 | 201  | 321  | 0.63 | 22.9   | 0.1640 | 0.0013 | 10.3613 | 0.1805 | 0.4582 | 0.0078 | 0.9795 | 2498 | 13.58 | 2468 | 16.22 | 2432 | 34.59 | 2.7  |
| 17DL04-1-31 | 160 | 111  | 121  | 0.92 | 0.0000 | 0.0927 | 0.0012 | 3.3910  | 0.0611 | 0.2655 | 0.0038 | 0.7866 | 1481 | 24.23 | 1502 | 14.17 | 1518 | 19.19 | -2.4 |
| 17DL04-1-32 | 145 | 142  | 135  | 1.05 | 24.9   | 0.0812 | 0.0011 | 2.1922  | 0.0446 | 0.1956 | 0.0030 | 0.7459 | 1228 | 27.78 | 1179 | 14.20 | 1152 | 16.01 | 6.6  |
| 17DL04-1-34 | 111 | 74.2 | 48.2 | 1.54 | 19.9   | 0.1085 | 0.0017 | 4.4306  | 0.0761 | 0.2968 | 0.0040 | 0.7779 | 1776 | 28.09 | 1718 | 14.28 | 1675 | 19.74 | 6.0  |
| 17DL04-1-35 | 429 | 330  | 195  | 1.69 | 0.0000 | 0.0986 | 0.0011 | 3.7702  | 0.0726 | 0.2776 | 0.0048 | 0.9052 | 1598 | 20.06 | 1586 | 15.49 | 1579 | 24.43 | 1.2  |
| 17DL04-1-36 | 162 | 107  | 158  | 0.68 | 0.0000 | 0.0963 | 0.0011 | 3.5945  | 0.0647 | 0.2711 | 0.0044 | 0.8982 | 1554 | 22.06 | 1548 | 14.35 | 1546 | 22.26 | 0.5  |
| 17DL04-1-37 | 494 | 530  | 181  | 2.93 | 6.51   | 0.0776 | 0.0009 | 2.0957  | 0.0386 | 0.1960 | 0.0032 | 0.8993 | 1139 | 22.23 | 1147 | 12.69 | 1154 | 17.51 | -1.3 |
| 17DL04-1-38 | 346 | 342  | 316  | 1.08 | 6.95   | 0.0792 | 0.0009 | 2.1078  | 0.0359 | 0.1934 | 0.0031 | 0.9314 | 1177 | 21.91 | 1151 | 11.76 | 1140 | 16.60 | 3.3  |
| 17DL04-1-39 | 384 | 389  | 259  | 1.50 | 13.9   | 0.0799 | 0.0010 | 2.2110  | 0.0433 | 0.2006 | 0.0029 | 0.7349 | 1194 | 25.46 | 1185 | 13.73 | 1179 | 15.53 | 1.3  |
| 17DL04-1-40 | 219 | 133  | 135  | 0.98 | 14.2   | 0.1091 | 0.0014 | 4.6870  | 0.0949 | 0.3114 | 0.0046 | 0.7296 | 1784 | 23.15 | 1765 | 16.98 | 1748 | 22.62 | 2.1  |
| 17DL04-1-41 | 332 | 245  | 155  | 1.58 | 0.0000 | 0.1013 | 0.0016 | 3.9083  | 0.0753 | 0.2806 | 0.0043 | 0.7983 | 1650 | 28.24 | 1615 | 15.61 | 1594 | 21.74 | 3.5  |
| 17DL04-1-42 | 86  | 90.7 | 52.2 | 1.74 | 16.7   | 0.0814 | 0.0022 | 2.2826  | 0.0678 | 0.2041 | 0.0038 | 0.6322 | 1231 | 47.22 | 1207 | 20.98 | 1197 | 20.53 | 2.8  |
| 17DL04-1-43 | 139 | 107  | 242  | 0.44 | 9.3    | 0.0793 | 0.0009 | 2.1857  | 0.0390 | 0.2002 | 0.0031 | 0.8661 | 1189 | 18.36 | 1176 | 12.47 | 1177 | 16.65 | 1.0  |
| 17DL04-1-44 | 200 | 144  | 66.1 | 2.18 | 1.50   | 0.1046 | 0.0017 | 4.2938  | 0.0837 | 0.2983 | 0.0042 | 0.7137 | 1709 | 29.63 | 1692 | 16.10 | 1683 | 20.64 | 1.6  |
| 17DL04-1-45 | 140 | 54.4 | 72.1 | 0.75 | 0.0000 | 0.1607 | 0.0018 | 10.4875 | 0.1729 | 0.4750 | 0.0082 | 1.0510 | 2465 | 13.89 | 2479 | 15.37 | 2505 | 35.99 | -1.6 |

|             |      |      |       |      |        |        |        |         |        |        |        |        |      |       |      |       |      |       |      |
|-------------|------|------|-------|------|--------|--------|--------|---------|--------|--------|--------|--------|------|-------|------|-------|------|-------|------|
| 17DL04-1-46 | 252  | 205  | 174   | 1.18 | 0.0000 | 0.0911 | 0.0010 | 3.1368  | 0.0532 | 0.2498 | 0.0033 | 0.7859 | 1450 | 22.22 | 1442 | 13.10 | 1437 | 17.19 | 0.9  |
| 17DL04-1-47 | 260  | 180  | 154   | 1.17 | 38.5   | 0.1001 | 0.0012 | 3.9143  | 0.0715 | 0.2838 | 0.0041 | 0.7952 | 1628 | 22.22 | 1617 | 14.82 | 1610 | 20.72 | 1.1  |
| 17DL04-1-48 | 296  | 232  | 166   | 1.40 | 0.0000 | 0.0957 | 0.0012 | 3.6007  | 0.0652 | 0.2736 | 0.0047 | 0.9419 | 1543 | 22.38 | 1550 | 14.43 | 1559 | 23.63 | -1.0 |
| 17DL04-1-49 | 418  | 303  | 252   | 1.20 | 19.4   | 0.0989 | 0.0010 | 3.7741  | 0.0713 | 0.2766 | 0.0044 | 0.8338 | 1606 | 23.15 | 1587 | 15.19 | 1574 | 22.00 | 2.0  |
| 17DL04-1-50 | 237  | 135  | 218   | 0.62 | 18.2   | 0.1055 | 0.0010 | 4.4718  | 0.0763 | 0.3079 | 0.0049 | 0.9346 | 1724 | 17.44 | 1726 | 14.21 | 1730 | 24.23 | -0.4 |
| 17DL04-1-52 | 384  | 367  | 331   | 1.11 | 4.87   | 0.0784 | 0.0007 | 2.2056  | 0.0408 | 0.2038 | 0.0032 | 0.8434 | 1158 | 18.05 | 1183 | 12.95 | 1196 | 17.04 | -3.1 |
| 17DL04-1-53 | 235  | 133  | 212   | 0.63 | 4.16   | 0.1066 | 0.0011 | 4.6072  | 0.0858 | 0.3136 | 0.0053 | 0.9094 | 1743 | 18.68 | 1751 | 15.59 | 1759 | 26.09 | -0.9 |
| 17DL04-1-54 | 175  | 128  | 81.6  | 1.57 | 16.2   | 0.0970 | 0.0015 | 3.7592  | 0.0665 | 0.2819 | 0.0042 | 0.8342 | 1569 | 28.39 | 1584 | 14.24 | 1601 | 20.95 | -2.0 |
| 17DL04-1-56 | 898  | 472  | 564   | 0.84 | 0.0000 | 0.1198 | 0.0008 | 5.9709  | 0.1079 | 0.3621 | 0.0069 | 1.0592 | 1954 | 11.27 | 1972 | 15.77 | 1992 | 32.81 | -1.9 |
| 17DL04-1-57 | 142  | 90.0 | 92.8  | 0.97 | 0.0000 | 0.1061 | 0.0012 | 4.3047  | 0.0706 | 0.2941 | 0.0039 | 0.8075 | 1800 | 20.06 | 1694 | 13.57 | 1662 | 19.43 | 8.3  |
| 17DL04-1-58 | 130  | 72.9 | 86.1  | 0.85 | 0.0000 | 0.1126 | 0.0012 | 5.1808  | 0.0947 | 0.3344 | 0.0060 | 0.9762 | 1843 | 13.89 | 1849 | 15.61 | 1859 | 28.85 | -0.9 |
| 17DL04-1-59 | 194  | 136  | 120   | 1.13 | 1.79   | 0.1002 | 0.0012 | 3.9724  | 0.0778 | 0.2875 | 0.0046 | 0.8110 | 1628 | 22.68 | 1629 | 15.94 | 1629 | 22.89 | 0.0  |
| 17DL04-1-60 | 223  | 151  | 156   | 0.97 | 4.04   | 0.0973 | 0.0009 | 3.7592  | 0.0659 | 0.2803 | 0.0046 | 0.9404 | 1574 | 12.19 | 1584 | 14.11 | 1593 | 23.29 | -1.2 |
| 17DL04-1-61 | 690  | 339  | 151   | 2.25 | 4.37   | 0.1664 | 0.0016 | 10.8965 | 0.2198 | 0.4748 | 0.0086 | 0.8932 | 2521 | 16.82 | 2514 | 18.84 | 2504 | 37.42 | 0.7  |
| 17DL04-1-63 | 1018 | 765  | 539   | 1.42 | 13.2   | 0.1013 | 0.0011 | 3.6962  | 0.0560 | 0.2645 | 0.0034 | 0.8582 | 1650 | 20.06 | 1571 | 12.15 | 1513 | 17.54 | 9.1  |
| 17DL04-1-64 | 219  | 124  | 178   | 0.70 | 26.2   | 0.0968 | 0.0009 | 3.9918  | 0.0668 | 0.2989 | 0.0043 | 0.8666 | 1565 | 18.52 | 1633 | 13.64 | 1686 | 21.55 | -7.2 |
| 17DL04-1-65 | 241  | 168  | 167   | 1.00 | 0.0000 | 0.0916 | 0.0010 | 3.3858  | 0.0480 | 0.2679 | 0.0030 | 0.7833 | 1461 | 20.06 | 1501 | 11.15 | 1530 | 15.14 | -4.5 |
| 17DL04-1-66 | 244  | 195  | 157   | 1.24 | 14.9   | 0.0913 | 0.0012 | 3.0603  | 0.0612 | 0.2427 | 0.0036 | 0.7349 | 1454 | 25.47 | 1423 | 15.33 | 1401 | 18.51 | 3.8  |
| 17DL04-1-67 | 215  | 146  | 144   | 1.01 | 0.0000 | 0.1003 | 0.0011 | 3.9112  | 0.0761 | 0.2826 | 0.0048 | 0.8668 | 1631 | 21.14 | 1616 | 15.78 | 1604 | 23.98 | 1.7  |
| 17DL04-1-68 | 326  | 214  | 183   | 1.17 | 0.0000 | 0.1047 | 0.0011 | 4.2563  | 0.0744 | 0.2945 | 0.0042 | 0.8071 | 1709 | 13.89 | 1685 | 14.42 | 1664 | 20.71 | 2.7  |
| 17DL04-1-69 | 293  | 324  | 109   | 2.98 | 3.30   | 0.0800 | 0.0013 | 2.0270  | 0.0436 | 0.1837 | 0.0028 | 0.6990 | 1198 | 31.94 | 1125 | 14.64 | 1087 | 15.05 | 10.2 |
| 17DL04-1-70 | 271  | 203  | 105   | 1.94 | 14.0   | 0.0974 | 0.0011 | 3.7489  | 0.0721 | 0.2791 | 0.0048 | 0.8972 | 1576 | 22.22 | 1582 | 15.45 | 1587 | 24.28 | -0.7 |
| 17DL04-1-71 | 666  | 437  | 341   | 1.28 | 0.0000 | 0.1045 | 0.0009 | 4.3777  | 0.0818 | 0.3039 | 0.0056 | 0.9822 | 1706 | 10.34 | 1708 | 15.48 | 1710 | 27.58 | -0.3 |
| 17DL04-1-73 | 166  | 119  | 100.7 | 1.18 | 0.0000 | 0.0974 | 0.0014 | 3.5997  | 0.0711 | 0.2680 | 0.0042 | 0.7962 | 1576 | 26.39 | 1549 | 15.74 | 1530 | 21.45 | 3.0  |
| 17DL04-1-74 | 382  | 293  | 361   | 0.81 | 3.2034 | 0.0864 | 0.0012 | 2.7671  | 0.0386 | 0.2321 | 0.0031 | 0.9485 | 1348 | 25.62 | 1347 | 10.45 | 1346 | 16.09 | 0.2  |
| 17DL04-1-75 | 113  | 104  | 120   | 0.87 | 0.0000 | 0.0772 | 0.0010 | 2.0948  | 0.0398 | 0.1967 | 0.0028 | 0.7586 | 1125 | 25.93 | 1147 | 13.08 | 1158 | 15.28 | -2.8 |
| 17DL04-1-76 | 165  | 135  | 187   | 0.72 | 15.6   | 0.0796 | 0.0009 | 2.3692  | 0.0448 | 0.2159 | 0.0036 | 0.8834 | 1187 | 22.22 | 1233 | 13.54 | 1260 | 19.15 | -5.8 |
| 17DL04-1-77 | 254  | 249  | 199   | 1.25 | 0.0000 | 0.0787 | 0.0010 | 2.1644  | 0.0398 | 0.1994 | 0.0029 | 0.7942 | 1165 | 25.92 | 1170 | 12.81 | 1172 | 15.68 | -0.6 |
| 17DL04-1-78 | 174  | 150  | 126   | 1.19 | 0.0000 | 0.0866 | 0.0015 | 2.6037  | 0.0585 | 0.2178 | 0.0026 | 0.5356 | 1351 | 33.80 | 1302 | 16.50 | 1270 | 13.89 | 6.4  |
| 17DL04-1-79 | 132  | 98.4 | 60.9  | 1.62 | 18.8   | 0.0961 | 0.0016 | 3.5788  | 0.0707 | 0.2711 | 0.0047 | 0.8714 | 1550 | 32.56 | 1545 | 15.71 | 1546 | 23.68 | 0.3  |
| 17DL04-1-80 | 211  | 114  | 185   | 0.62 | 51.2   | 0.1074 | 0.0010 | 4.6443  | 0.0820 | 0.3135 | 0.0051 | 0.9166 | 1767 | 17.44 | 1757 | 14.79 | 1758 | 24.91 | 0.5  |
| 17DL04-1-81 | 512  | 337  | 258   | 1.31 | 0.0000 | 0.1058 | 0.0011 | 4.4565  | 0.0801 | 0.3054 | 0.0046 | 0.8355 | 1728 | 18.52 | 1723 | 14.96 | 1718 | 22.67 | 0.6  |
| 17DL04-1-82 | 282  | 151  | 244   | 0.62 | 0.0000 | 0.1074 | 0.0010 | 4.6118  | 0.0711 | 0.3119 | 0.0049 | 1.0233 | 1767 | 16.36 | 1751 | 12.91 | 1750 | 24.19 | 0.9  |
| 17DL04-1-83 | 451  | 475  | 164   | 2.89 | 22.2   | 0.0781 | 0.0009 | 2.1094  | 0.0397 | 0.1959 | 0.0031 | 0.8432 | 1150 | 24.08 | 1152 | 12.98 | 1153 | 16.75 | -0.3 |
| 17DL04-1-84 | 402  | 321  | 171   | 1.87 | 40.2   | 0.0957 | 0.0011 | 3.2774  | 0.0700 | 0.2479 | 0.0043 | 0.8119 | 1543 | 22.38 | 1476 | 16.64 | 1428 | 22.21 | 8.0  |
| 17DL04-1-85 | 357  | 258  | 235   | 1.10 | 43.4   | 0.0963 | 0.0011 | 3.5838  | 0.0634 | 0.2697 | 0.0038 | 0.7962 | 1555 | 15.74 | 1546 | 14.08 | 1539 | 19.30 | 1.0  |
| 17DL04-1-86 | 265  | 169  | 157   | 1.08 | 0.0000 | 0.1069 | 0.0013 | 4.5040  | 0.0755 | 0.3058 | 0.0041 | 0.8084 | 1747 | 22.22 | 1732 | 13.99 | 1720 | 20.49 | 1.6  |
| 17DL04-1-87 | 224  | 153  | 147   | 1.04 | 37.6   | 0.0966 | 0.0013 | 3.7145  | 0.0691 | 0.2790 | 0.0038 | 0.7401 | 1559 | 19.44 | 1575 | 14.92 | 1586 | 19.38 | -1.7 |
| 17DL04-1-88 | 117  | 89.5 | 58.7  | 1.52 | 0.0000 | 0.0957 | 0.0015 | 3.5370  | 0.0669 | 0.2685 | 0.0037 | 0.7197 | 1543 | 25.00 | 1536 | 15.00 | 1533 | 18.58 | 0.6  |
| 17DL04-1-89 | 205  | 149  | 163   | 0.92 | 13.2   | 0.0953 | 0.0015 | 3.4492  | 0.0794 | 0.2631 | 0.0049 | 0.8127 | 1533 | 27.93 | 1516 | 18.14 | 1506 | 25.13 | 1.8  |
| 17DL04-1-90 | 274  | 229  | 516   | 0.44 | 20.4   | 0.0779 | 0.0009 | 1.9065  | 0.0355 | 0.1774 | 0.0025 | 0.7675 | 1146 | 23.31 | 1083 | 12.43 | 1053 | 13.90 | 8.9  |
| 17DL04-1-91 | 101  | 100  | 120   | 0.83 | 0.0000 | 0.0768 | 0.0012 | 1.9363  | 0.0376 | 0.1829 | 0.0025 | 0.7076 | 1117 | 30.09 | 1094 | 13.03 | 1083 | 13.72 | 3.1  |

|                                                  |      |      |      |      |        |        |        |         |        |        |        |        |      |       |      |       |      |       |      |
|--------------------------------------------------|------|------|------|------|--------|--------|--------|---------|--------|--------|--------|--------|------|-------|------|-------|------|-------|------|
| 17DL04-1-92                                      | 208  | 195  | 161  | 1.22 | 0.0000 | 0.0801 | 0.0010 | 2.3051  | 0.0495 | 0.2087 | 0.0039 | 0.8601 | 1267 | 25.92 | 1214 | 15.24 | 1222 | 20.59 | 3.7  |
| 17DL04-1-93                                      | 242  | 177  | 148  | 1.20 | 0.0000 | 0.0956 | 0.0014 | 3.5496  | 0.0849 | 0.2688 | 0.0045 | 0.7031 | 1540 | 23.15 | 1538 | 18.98 | 1535 | 22.98 | 0.3  |
| 17DL04-1-94                                      | 822  | 708  | 237  | 2.99 | 0.0000 | 0.0939 | 0.0010 | 3.3227  | 0.0660 | 0.2564 | 0.0042 | 0.8174 | 1506 | 18.98 | 1486 | 15.53 | 1471 | 21.37 | 2.3  |
| 17DL04-1-95                                      | 93   | 59.7 | 92.3 | 0.65 | 0.0000 | 0.0985 | 0.0012 | 3.6864  | 0.0622 | 0.2711 | 0.0031 | 0.6782 | 1598 | 23.92 | 1568 | 13.52 | 1546 | 15.76 | 3.3  |
| 17DL04-1-96                                      | 168  | 110  | 133  | 0.82 | 41.8   | 0.0989 | 0.0012 | 3.8873  | 0.0714 | 0.2852 | 0.0043 | 0.8296 | 1603 | 22.22 | 1611 | 14.87 | 1617 | 21.81 | -0.9 |
| 17DL04-1-97                                      | 349  | 208  | 360  | 0.58 | 0.0000 | 0.0966 | 0.0009 | 3.7287  | 0.0609 | 0.2798 | 0.0041 | 0.8927 | 1561 | 17.13 | 1578 | 13.13 | 1590 | 20.58 | -1.8 |
| 17DL04-1-98                                      | 120  | 79.9 | 68.8 | 1.16 | 0.0000 | 0.0966 | 0.0015 | 3.8007  | 0.0709 | 0.2855 | 0.0037 | 0.7000 | 1561 | 29.63 | 1593 | 15.04 | 1619 | 18.72 | -3.6 |
| 17DL04-1-99                                      | 121  | 87.9 | 62.1 | 1.42 | 1.12   | 0.0965 | 0.0015 | 3.7583  | 0.0856 | 0.2818 | 0.0044 | 0.6904 | 1558 | 29.94 | 1584 | 18.29 | 1600 | 22.30 | -2.6 |
| 17DL04-1-100                                     | 182  | 127  | 111  | 1.15 | 0.0000 | 0.0997 | 0.0013 | 3.8809  | 0.0718 | 0.2819 | 0.0041 | 0.7858 | 1620 | 24.08 | 1610 | 14.97 | 1601 | 20.62 | 1.2  |
| Rejected analyses (discordant > 10%, error > 5%) |      |      |      |      |        |        |        |         |        |        |        |        |      |       |      |       |      |       |      |
| 17DL04-1-05                                      | 216  | 222  | 122  | 1.83 | 0.0000 | 0.0812 | 0.0029 | 2.1857  | 0.0822 | 0.1951 | 0.0028 | 0.3854 | 1228 | 63.89 | 1176 | 26.20 | 1149 | 15.26 | 6.8  |
| 17DL04-1-26                                      | 594  | 611  | 506  | 1.21 | 5.95   | 0.0801 | 0.0009 | 1.9187  | 0.0300 | 0.1735 | 0.0019 | 0.7167 | 1267 | 27.93 | 1088 | 10.47 | 1031 | 10.70 | 22.8 |
| 17DL04-1-27                                      | 412  | 327  | 163  | 2.01 | 0.0000 | 0.0988 | 0.0012 | 3.5847  | 0.0807 | 0.2628 | 0.0045 | 0.7554 | 2000 | 23.76 | 1546 | 17.91 | 1504 | 22.83 | 33.0 |
| 17DL04-1-33                                      | 978  | 1073 | 669  | 1.60 | 0.0000 | 0.0784 | 0.0010 | 1.8615  | 0.0380 | 0.1722 | 0.0028 | 0.8097 | 1167 | 24.84 | 1068 | 13.50 | 1024 | 15.65 | 13.9 |
| 17DL04-1-51                                      | 135  | 86.8 | 64.7 | 1.34 | 44.2   | 0.1042 | 0.0033 | 4.3807  | 0.1481 | 0.3048 | 0.0048 | 0.4690 | 1702 | 58.18 | 1709 | 27.97 | 1715 | 23.90 | -0.8 |
| 17DL04-1-55                                      | 250  | 180  | 271  | 0.66 | 0.0000 | 0.0933 | 0.0010 | 2.9822  | 0.0430 | 0.2319 | 0.0031 | 0.9294 | 1494 | 18.98 | 1403 | 10.99 | 1345 | 16.26 | 11.1 |
| 17DL04-1-62                                      | 208  | 135  | 168  | 0.81 | 0.0000 | 0.0988 | 0.0010 | 3.9018  | 0.0705 | 0.2864 | 0.0046 | 0.8837 | 2000 | 18.67 | 1614 | 14.65 | 1623 | 22.94 | 23.2 |
| 17DL04-1-72                                      | 397  | 284  | 204  | 1.39 | 0.0000 | 0.0987 | 0.0012 | 3.7146  | 0.0607 | 0.2726 | 0.0036 | 0.8075 | 2000 | 16.51 | 1575 | 13.12 | 1554 | 18.24 | 28.7 |
| Sample17DL05-1 (38°51'18.06"N , 121°32'05.19"E)  |      |      |      |      |        |        |        |         |        |        |        |        |      |       |      |       |      |       |      |
| Detrital zircons                                 |      |      |      |      |        |        |        |         |        |        |        |        |      |       |      |       |      |       |      |
| 17DL05-1.1-01                                    | 266  | 176  | 197  | 0.89 | 0.0000 | 0.0977 | 0.0012 | 3.7449  | 0.0698 | 0.2774 | 0.0043 | 0.8226 | 1581 | 23.92 | 1581 | 14.98 | 1578 | 21.48 | 0.2  |
| 17DL05-1.1-02                                    | 208  | 199  | 210  | 0.95 | 5.6294 | 0.0817 | 0.0015 | 2.2023  | 0.0517 | 0.1954 | 0.0037 | 0.8061 | 1239 | 2.93  | 1182 | 16.41 | 1151 | 19.95 | 7.7  |
| 17DL05-1.1-03                                    | 223  | 218  | 165  | 1.32 | 0.0000 | 0.0795 | 0.0015 | 2.2357  | 0.0496 | 0.2039 | 0.0032 | 0.6963 | 1187 | 35.95 | 1192 | 15.60 | 1196 | 16.89 | -0.8 |
| 17DL05-1.1-04                                    | 300  | 193  | 205  | 0.94 | 17.7   | 0.1005 | 0.0013 | 4.1290  | 0.0820 | 0.2976 | 0.0049 | 0.8308 | 1635 | 23.76 | 1660 | 16.26 | 1680 | 24.40 | -2.6 |
| 17DL05-1.1-05                                    | 293  | 182  | 207  | 0.88 | 4.40   | 0.0997 | 0.0014 | 4.1399  | 0.0792 | 0.3012 | 0.0043 | 0.7537 | 1618 | 26.54 | 1662 | 15.69 | 1697 | 21.54 | -4.7 |
| 17DL05-1.1-06                                    | 159  | 95.1 | 152  | 0.63 | 0.0000 | 0.0992 | 0.0015 | 3.9592  | 0.0906 | 0.2900 | 0.0057 | 0.8635 | 1609 | 27.78 | 1626 | 18.58 | 1641 | 28.65 | -2.0 |
| 17DL05-1.1-07                                    | 190  | 130  | 98   | 1.33 | 0.0000 | 0.0990 | 0.0016 | 3.9023  | 0.0732 | 0.2863 | 0.0036 | 0.6718 | 1606 | 29.63 | 1614 | 15.20 | 1623 | 18.10 | -1.1 |
| 17DL05-1.1-08                                    | 345  | 246  | 239  | 1.03 | 0.0000 | 0.0908 | 0.0013 | 3.3555  | 0.0675 | 0.2681 | 0.0040 | 0.7338 | 1443 | 28.09 | 1494 | 15.76 | 1531 | 20.13 | -5.8 |
| 17DL05-1.1-09                                    | 331  | 151  | 236  | 0.64 | 0.0000 | 0.1212 | 0.0015 | 6.2546  | 0.1130 | 0.3745 | 0.0051 | 0.7603 | 1973 | 22.22 | 2012 | 15.88 | 2050 | 24.16 | -3.8 |
| 17DL05-1.1-10                                    | 216  | 143  | 161  | 0.88 | 0.0000 | 0.0977 | 0.0017 | 3.8688  | 0.0920 | 0.2869 | 0.0043 | 0.6241 | 1581 | 31.48 | 1607 | 19.21 | 1626 | 21.33 | -2.8 |
| 17DL05-1.1-11                                    | 164  | 105  | 110  | 0.96 | 0.0000 | 0.1017 | 0.0018 | 4.0806  | 0.0869 | 0.2915 | 0.0042 | 0.6719 | 1657 | 27.01 | 1650 | 17.40 | 1649 | 20.83 | 0.5  |
| 17DL05-1.1-12                                    | 247  | 227  | 259  | 0.88 | 0.71   | 0.0802 | 0.0012 | 2.2094  | 0.0469 | 0.2002 | 0.0033 | 0.7874 | 1267 | 28.55 | 1184 | 14.85 | 1177 | 17.97 | 7.7  |
| 17DL05-1.1-13                                    | 219  | 196  | 221  | 0.89 | 10.0   | 0.0808 | 0.0014 | 2.2530  | 0.0525 | 0.2023 | 0.0032 | 0.6871 | 1217 | 33.48 | 1198 | 16.42 | 1188 | 17.40 | 2.4  |
| 17DL05-1.1-14                                    | 259  | 106  | 90.2 | 1.17 | 0.0000 | 0.1650 | 0.0022 | 11.4331 | 0.2220 | 0.5029 | 0.0075 | 0.7699 | 2509 | 22.22 | 2559 | 18.21 | 2626 | 32.27 | -4.4 |
| 17DL05-1.1-15                                    | 1284 | 601  | 227  | 2.65 | 0.0000 | 0.1613 | 0.0017 | 10.5579 | 0.1992 | 0.4744 | 0.0068 | 0.7556 | 2469 | 18.21 | 2485 | 17.58 | 2503 | 29.60 | -1.4 |
| 17DL05-1.1-16                                    | 344  | 339  | 202  | 1.68 | 16.2   | 0.0805 | 0.0014 | 2.1674  | 0.0462 | 0.1954 | 0.0026 | 0.6272 | 1209 | 33.33 | 1171 | 14.84 | 1150 | 14.11 | 5.1  |
| 17DL05-1.1-17                                    | 459  | 180  | 541  | 0.33 | 0.0000 | 0.1151 | 0.0013 | 5.6399  | 0.1251 | 0.3554 | 0.0066 | 0.8404 | 1881 | 20.21 | 1922 | 19.18 | 1960 | 31.53 | -4.1 |
| 17DL05-1.1-18                                    | 236  | 150  | 190  | 0.79 | 0.0000 | 0.0977 | 0.0014 | 3.7373  | 0.0682 | 0.2774 | 0.0035 | 0.6891 | 1581 | 27.62 | 1579 | 14.67 | 1578 | 17.64 | 0.2  |
| 17DL05-1.1-19                                    | 180  | 43.4 | 291  | 0.15 | 5.91   | 0.1191 | 0.0016 | 6.2172  | 0.1221 | 0.3791 | 0.0066 | 0.8814 | 1943 | 24.08 | 2007 | 17.24 | 2072 | 30.70 | -6.2 |
| 17DL05-1.1-20                                    | 121  | 80.0 | 85.5 | 0.94 | 1.45   | 0.0995 | 0.0020 | 3.8914  | 0.0958 | 0.2836 | 0.0042 | 0.5972 | 1617 | 38.42 | 1612 | 19.91 | 1610 | 20.95 | 0.4  |



|               |       |      |      |      |        |        |        |         |        |        |        |        |      |       |      |       |      |       |      |
|---------------|-------|------|------|------|--------|--------|--------|---------|--------|--------|--------|--------|------|-------|------|-------|------|-------|------|
| 17DL05-1.1-21 | 234   | 98.6 | 148  | 0.67 | 0.0000 | 0.1370 | 0.0020 | 7.9685  | 0.2080 | 0.4216 | 0.0093 | 0.8415 | 2191 | 24.85 | 2227 | 23.60 | 2268 | 42.01 | -3.4 |
| 17DL05-1.1-22 | 707   | 454  | 295  | 1.54 | 0.0000 | 0.1042 | 0.0015 | 4.4269  | 0.0809 | 0.3079 | 0.0041 | 0.7283 | 1702 | 25.93 | 1717 | 15.19 | 1730 | 20.23 | -1.6 |
| 17DL05-1.1-23 | 234   | 230  | 186  | 1.24 | 17.3   | 0.0764 | 0.0014 | 2.0494  | 0.0419 | 0.1949 | 0.0026 | 0.6541 | 1106 | 4.63  | 1132 | 13.97 | 1148 | 14.07 | -3.7 |
| 17DL05-1.1-24 | 309   | 132  | 386  | 0.34 | 4.03   | 0.1076 | 0.0013 | 4.9196  | 0.0903 | 0.3317 | 0.0057 | 0.9307 | 1761 | 21.14 | 1806 | 15.54 | 1847 | 27.45 | -4.6 |
| 17DL05-1.1-25 | 438   | 180  | 196  | 0.92 | 0.0000 | 0.1509 | 0.0018 | 9.5956  | 0.1678 | 0.4613 | 0.0071 | 0.8813 | 2367 | 19.75 | 2397 | 16.16 | 2445 | 31.38 | -3.2 |
| 17DL05-1.1-26 | 133   | 90.1 | 69.8 | 1.29 | 16.6   | 0.1022 | 0.0020 | 3.9677  | 0.0815 | 0.2821 | 0.0040 | 0.6899 | 1665 | 35.50 | 1628 | 16.69 | 1602 | 20.12 | 3.9  |
| 17DL05-1.1-27 | 253   | 165  | 167  | 0.99 | 0.0000 | 0.0972 | 0.0015 | 3.8513  | 0.0762 | 0.2876 | 0.0042 | 0.7389 | 1570 | 29.32 | 1604 | 15.98 | 1629 | 21.06 | -3.6 |
| 17DL05-1.1-28 | 156   | 138  | 161  | 0.86 | 0.0000 | 0.0785 | 0.0013 | 2.2285  | 0.0475 | 0.2060 | 0.0034 | 0.7720 | 1159 | 31.48 | 1190 | 14.95 | 1208 | 18.12 | -4.0 |
| 17DL05-1.1-29 | 151   | 128  | 97.2 | 1.32 | 0.0000 | 0.0860 | 0.0020 | 2.6503  | 0.0711 | 0.2239 | 0.0035 | 0.5785 | 1339 | 41.67 | 1315 | 19.80 | 1302 | 18.32 | 2.8  |
| 17DL05-1.1-30 | 156   | 61.0 | 211  | 0.29 | 16.5   | 0.1113 | 0.0017 | 5.0290  | 0.1074 | 0.3273 | 0.0050 | 0.7218 | 1821 | 27.78 | 1824 | 18.12 | 1825 | 24.51 | -0.2 |
| 17DL05-1.1-31 | 182   | 93.6 | 141  | 0.66 | 12.8   | 0.1095 | 0.0017 | 4.8579  | 0.0988 | 0.3215 | 0.0049 | 0.7449 | 1792 | 27.78 | 1795 | 17.17 | 1797 | 23.78 | -0.3 |
| 17DL05-1.1-32 | 92.94 | 2.54 | 464  | 0.01 | 0.0000 | 0.0790 | 0.0010 | 2.2165  | 0.0416 | 0.2034 | 0.0031 | 0.8093 | 1172 | 25.93 | 1186 | 13.16 | 1194 | 16.57 | -1.8 |
| 17DL05-1.1-33 | 608   | 432  | 732  | 0.59 | 0.0000 | 0.0839 | 0.0010 | 2.6889  | 0.0538 | 0.2319 | 0.0034 | 0.7254 | 1300 | 23.46 | 1325 | 14.83 | 1344 | 17.61 | -3.3 |
| 17DL05-1.1-34 | 293   | 164  | 191  | 0.86 | 0.96   | 0.1067 | 0.0015 | 4.6707  | 0.0766 | 0.3177 | 0.0040 | 0.7628 | 1743 | 26.08 | 1762 | 13.77 | 1779 | 19.48 | -2.0 |
| 17DL05-1.1-35 | 492   | 507  | 206  | 2.46 | 0.0000 | 0.0757 | 0.0012 | 2.0752  | 0.0410 | 0.1987 | 0.0028 | 0.7198 | 1089 | 32.56 | 1141 | 13.57 | 1168 | 15.21 | -6.8 |
| 17DL05-1.1-36 | 273   | 150  | 225  | 0.67 | 0.0000 | 0.1004 | 0.0013 | 4.2297  | 0.0660 | 0.3054 | 0.0035 | 0.7381 | 1632 | 25.15 | 1680 | 12.86 | 1718 | 17.39 | -5.0 |
| 17DL05-1.1-37 | 135   | 123  | 113  | 1.09 | 0.0000 | 0.0793 | 0.0017 | 2.2809  | 0.0592 | 0.2085 | 0.0034 | 0.6357 | 1189 | 42.13 | 1206 | 18.35 | 1221 | 18.37 | -2.6 |
| 17DL05-1.1-38 | 307   | 227  | 168  | 1.36 | 0.0000 | 0.0939 | 0.0015 | 3.3984  | 0.0715 | 0.2621 | 0.0039 | 0.7014 | 1507 | 29.63 | 1504 | 16.53 | 1501 | 19.77 | 0.4  |
| 17DL05-1.1-39 | 608   | 355  | 365  | 0.97 | 0.0000 | 0.1077 | 0.0013 | 4.7015  | 0.0826 | 0.3164 | 0.0044 | 0.7874 | 1761 | 22.23 | 1768 | 14.75 | 1772 | 21.45 | -0.6 |
| 17DL05-1.1-40 | 104   | 97.7 | 77.9 | 1.25 | 30.1   | 0.0796 | 0.0020 | 2.2272  | 0.0614 | 0.2035 | 0.0037 | 0.6639 | 1187 | 48.14 | 1190 | 19.34 | 1194 | 19.96 | -0.6 |
| 17DL05-1.1-41 | 219   | 133  | 149  | 0.89 | 11.0   | 0.1015 | 0.0016 | 4.1491  | 0.0811 | 0.2965 | 0.0046 | 0.7918 | 1654 | 23.92 | 1664 | 16.02 | 1674 | 22.82 | -1.2 |
| 17DL05-1.1-42 | 343   | 205  | 146  | 1.41 | 0.0000 | 0.1087 | 0.0015 | 4.8968  | 0.0857 | 0.3265 | 0.0042 | 0.7379 | 1777 | 24.23 | 1802 | 14.81 | 1821 | 20.52 | -2.4 |
| 17DL05-1.1-43 | 278   | 165  | 192  | 0.86 | 16.3   | 0.0990 | 0.0015 | 4.0994  | 0.0845 | 0.3002 | 0.0048 | 0.7726 | 1606 | 27.47 | 1654 | 16.86 | 1693 | 23.72 | -5.1 |
| 17DL05-1.1-44 | 242   | 143  | 112  | 1.28 | 0.0000 | 0.1068 | 0.0015 | 4.7651  | 0.0906 | 0.3235 | 0.0046 | 0.7541 | 1746 | 25.93 | 1779 | 16.00 | 1807 | 22.60 | -3.3 |
| 17DL05-1.1-45 | 455   | 315  | 183  | 1.72 | 0.22   | 0.0995 | 0.0014 | 3.9078  | 0.0760 | 0.2846 | 0.0041 | 0.7426 | 1615 | 25.93 | 1615 | 15.77 | 1615 | 20.66 | 0.0  |
| 17DL05-1.1-46 | 131   | 82.9 | 97.1 | 0.85 | 8.19   | 0.0974 | 0.0016 | 3.6910  | 0.0755 | 0.2745 | 0.0037 | 0.6591 | 1576 | 29.78 | 1569 | 16.38 | 1564 | 18.75 | 0.8  |
| 17DL05-1.1-47 | 229   | 76.1 | 129  | 0.59 | 0.0000 | 0.1653 | 0.0019 | 11.0928 | 0.1945 | 0.4863 | 0.0069 | 0.8125 | 2511 | 19.75 | 2531 | 16.42 | 2555 | 30.08 | -1.7 |
| 17DL05-1.1-48 | 152   | 90.5 | 184  | 0.49 | 0.00   | 0.0912 | 0.0014 | 3.2723  | 0.0741 | 0.2601 | 0.0045 | 0.7662 | 1452 | 29.94 | 1474 | 17.65 | 1491 | 23.12 | -2.6 |
| 17DL05-1.1-49 | 328   | 296  | 274  | 1.08 | 0.00   | 0.0799 | 0.0013 | 2.1691  | 0.0495 | 0.1970 | 0.0033 | 0.7368 | 1194 | 32.25 | 1171 | 15.86 | 1159 | 17.83 | 3.1  |
| 17DL05-1.1-50 | 221.4 | 8.59 | 1034 | 0.01 | 0.0000 | 0.0782 | 0.0010 | 2.2860  | 0.0480 | 0.2122 | 0.0040 | 0.9025 | 1152 | 24.07 | 1208 | 14.86 | 1240 | 21.40 | -7.2 |
| 17DL05-1.1-51 | 367   | 223  | 262  | 0.85 | 22.2   | 0.0985 | 0.0013 | 3.9180  | 0.0735 | 0.2888 | 0.0048 | 0.8816 | 1598 | 24.23 | 1617 | 15.21 | 1635 | 23.89 | -2.3 |
| 17DL05-1.1-53 | 451   | 447  | 237  | 1.88 | 0.0000 | 0.0755 | 0.0013 | 2.0317  | 0.0399 | 0.1955 | 0.0026 | 0.6729 | 1081 | 29.16 | 1126 | 13.38 | 1151 | 13.94 | -6.1 |
| 17DL05-1.1-55 | 231   | 213  | 202  | 1.05 | 0.0000 | 0.0798 | 0.0013 | 2.1823  | 0.0446 | 0.1985 | 0.0027 | 0.6696 | 1192 | 33.33 | 1175 | 14.25 | 1167 | 14.62 | 2.1  |
| 17DL05-1.1-56 | 187   | 109  | 177  | 0.62 | 17.1   | 0.0992 | 0.0014 | 3.8377  | 0.0694 | 0.2811 | 0.0043 | 0.8444 | 1609 | 25.92 | 1601 | 14.61 | 1597 | 21.63 | 0.8  |
| 17DL05-1.1-57 | 130   | 93.3 | 65.7 | 1.42 | 0.0000 | 0.0943 | 0.0019 | 3.5715  | 0.0786 | 0.2751 | 0.0036 | 0.5886 | 1515 | 37.81 | 1543 | 17.49 | 1566 | 18.04 | -3.3 |
| 17DL05-1.1-58 | 585   | 318  | 439  | 0.73 | 0.0000 | 0.1047 | 0.0012 | 4.5947  | 0.0870 | 0.3180 | 0.0049 | 0.8076 | 1710 | 21.76 | 1748 | 15.83 | 1780 | 23.81 | -4.0 |
| 17DL05-1.1-59 | 137   | 78.6 | 160  | 0.49 | 0.0000 | 0.0987 | 0.0017 | 3.6876  | 0.0757 | 0.2713 | 0.0039 | 0.6973 | 1599 | 31.48 | 1569 | 16.42 | 1548 | 19.70 | 3.3  |
| 17DL05-1.1-60 | 149   | 66.2 | 31.6 | 2.09 | 0.0000 | 0.1706 | 0.0032 | 11.2141 | 0.3014 | 0.4765 | 0.0087 | 0.6796 | 2565 | 31.48 | 2541 | 25.12 | 2512 | 38.03 | 2.1  |
| 17DL05-1.1-61 | 156   | 103  | 117  | 0.88 | 0.0000 | 0.0967 | 0.0017 | 3.6622  | 0.0882 | 0.2744 | 0.0046 | 0.6922 | 1561 | 33.33 | 1563 | 19.24 | 1563 | 23.15 | -0.1 |
| 17DL05-1.1-62 | 129   | 82.3 | 94.6 | 0.87 | 0.0000 | 0.1019 | 0.0018 | 3.8524  | 0.0709 | 0.2747 | 0.0040 | 0.7978 | 1659 | 31.64 | 1604 | 14.87 | 1564 | 20.41 | 6.0  |
| 17DL05-1.1-63 | 110.0 | 12.1 | 507  | 0.02 | 0.0000 | 0.0793 | 0.0010 | 2.1629  | 0.0364 | 0.1976 | 0.0025 | 0.7433 | 1189 | 24.53 | 1169 | 11.72 | 1162 | 13.32 | 2.3  |
| 17DL05-1.1-64 | 279   | 198  | 160  | 1.24 | 4.27   | 0.0979 | 0.0016 | 3.6761  | 0.0710 | 0.2721 | 0.0037 | 0.6980 | 1585 | 29.63 | 1566 | 15.45 | 1551 | 18.61 | 2.2  |

|                                                  |       |      |      |      |        |        |        |         |        |        |        |        |      |       |      |       |      |       |       |
|--------------------------------------------------|-------|------|------|------|--------|--------|--------|---------|--------|--------|--------|--------|------|-------|------|-------|------|-------|-------|
| 17DL05-1.1-65                                    | 31.92 | 1.35 | 160  | 0.01 | 3.88   | 0.0818 | 0.0014 | 2.2112  | 0.0467 | 0.1955 | 0.0027 | 0.6430 | 1243 | 31.94 | 1185 | 14.78 | 1151 | 14.32 | 7.9   |
| 17DL05-1.1-66                                    | 129   | 88.2 | 75.5 | 1.17 | 0.0000 | 0.0982 | 0.0019 | 3.8009  | 0.0923 | 0.2801 | 0.0044 | 0.6536 | 1591 | 35.95 | 1593 | 19.55 | 1592 | 22.41 | -0.1  |
| 17DL05-1.1-67                                    | 351   | 243  | 231  | 1.05 | 2.66   | 0.0979 | 0.0013 | 3.6052  | 0.0598 | 0.2666 | 0.0034 | 0.7694 | 1584 | 25.62 | 1551 | 13.24 | 1523 | 17.35 | 4.0   |
| 17DL05-1.1-68                                    | 244   | 156  | 160  | 0.97 | 0.0000 | 0.1051 | 0.0016 | 4.1231  | 0.0757 | 0.2841 | 0.0042 | 0.8096 | 1717 | 28.08 | 1659 | 15.04 | 1612 | 21.21 | 6.5   |
| 17DL05-1.1-69                                    | 171   | 119  | 123  | 0.97 | 0.0000 | 0.1003 | 0.0019 | 3.6621  | 0.0884 | 0.2638 | 0.0040 | 0.6304 | 1629 | 35.18 | 1563 | 19.28 | 1509 | 20.49 | 7.9   |
| 17DL05-1.1-70                                    | 255   | 175  | 129  | 1.36 | 0.0000 | 0.1040 | 0.0019 | 4.1194  | 0.1010 | 0.2857 | 0.0045 | 0.6363 | 1698 | 33.34 | 1658 | 20.07 | 1620 | 22.37 | 4.8   |
| 17DL05-1.1-71                                    | 343   | 70.1 | 468  | 0.15 | 0.0000 | 0.1520 | 0.0017 | 8.7301  | 0.1446 | 0.4154 | 0.0066 | 0.9613 | 2368 | 18.83 | 2310 | 15.17 | 2239 | 30.14 | 5.7   |
| 17DL05-1.1-72                                    | 115   | 107  | 116  | 0.93 | 0.0000 | 0.0808 | 0.0018 | 2.1277  | 0.0479 | 0.1906 | 0.0024 | 0.5511 | 1217 | 43.36 | 1158 | 15.57 | 1125 | 12.82 | 8.2   |
| 17DL05-1.1-73                                    | 251   | 108  | 347  | 0.31 | 4.85   | 0.1062 | 0.0013 | 4.4285  | 0.0756 | 0.3014 | 0.0043 | 0.8428 | 1735 | 26.39 | 1718 | 14.19 | 1698 | 21.50 | 2.2   |
| 17DL05-1.1-74                                    | 134   | 78.7 | 92.6 | 0.85 | 0.0000 | 0.1065 | 0.0018 | 4.4893  | 0.0865 | 0.3056 | 0.0049 | 0.8371 | 1740 | 31.48 | 1729 | 16.04 | 1719 | 24.35 | 1.2   |
| 17DL05-1.1-75                                    | 196   | 146  | 84.9 | 1.72 | 4.03   | 0.0992 | 0.0018 | 3.6781  | 0.0873 | 0.2677 | 0.0038 | 0.6056 | 1609 | 33.33 | 1567 | 18.97 | 1529 | 19.58 | 5.2   |
| 17DL05-1.1-76                                    | 261   | 139  | 224  | 0.62 | 0.0000 | 0.1085 | 0.0013 | 4.8705  | 0.0966 | 0.3253 | 0.0061 | 0.9432 | 1774 | 20.84 | 1797 | 16.75 | 1816 | 29.62 | -2.3  |
| 17DL05-1.1-77                                    | 200   | 86.4 | 173  | 0.50 | 10.9   | 0.1288 | 0.0014 | 6.4302  | 0.1029 | 0.3614 | 0.0051 | 0.8832 | 2083 | 19.60 | 2036 | 14.13 | 1989 | 24.21 | 4.8   |
| 17DL05-1.1-78                                    | 306   | 202  | 201  | 1.01 | 0.0000 | 0.1031 | 0.0015 | 4.0743  | 0.0913 | 0.2856 | 0.0046 | 0.7203 | 1681 | 27.78 | 1649 | 18.31 | 1620 | 23.14 | 3.8   |
| 17DL05-1.1-79                                    | 462   | 274  | 335  | 0.82 | 0.0000 | 0.1062 | 0.0012 | 4.5195  | 0.0687 | 0.3083 | 0.0043 | 0.9234 | 1735 | 26.08 | 1735 | 12.70 | 1733 | 21.36 | 0.2   |
| 17DL05-1.1-80                                    | 506   | 248  | 363  | 0.68 | 14.2   | 0.1197 | 0.0015 | 6.0981  | 0.1636 | 0.3676 | 0.0081 | 0.8244 | 1952 | 22.22 | 1990 | 23.44 | 2018 | 38.34 | -3.3  |
| 17DL05-1.1-81                                    | 337   | 217  | 203  | 1.07 | 0.0000 | 0.1009 | 0.0015 | 4.1087  | 0.0752 | 0.2955 | 0.0043 | 0.8013 | 1640 | 32.41 | 1656 | 14.98 | 1669 | 21.58 | -1.7  |
| 17DL05-1.1-82                                    | 277   | 192  | 155  | 1.24 | 15.55  | 0.1005 | 0.0016 | 3.9059  | 0.0754 | 0.2817 | 0.0039 | 0.7226 | 1635 | 30.71 | 1615 | 15.65 | 1600 | 19.79 | 2.2   |
| 17DL05-1.1-83                                    | 232   | 216  | 231  | 0.94 | 0.0000 | 0.0780 | 0.0014 | 2.0920  | 0.0432 | 0.1944 | 0.0027 | 0.6809 | 1147 | 30.56 | 1146 | 14.19 | 1145 | 14.75 | 0.2   |
| 17DL05-1.1-84                                    | 409   | 286  | 166  | 1.72 | 4.75   | 0.1032 | 0.0016 | 4.0957  | 0.0678 | 0.2881 | 0.0040 | 0.8358 | 1683 | 27.78 | 1653 | 13.56 | 1632 | 19.97 | 3.2   |
| 17DL05-1.1-85                                    | 140   | 141  | 115  | 1.23 | 0.0000 | 0.0752 | 0.0013 | 1.9758  | 0.0373 | 0.1908 | 0.0028 | 0.7883 | 1076 | 35.18 | 1107 | 12.76 | 1126 | 15.39 | -4.4  |
| 17DL05-1.1-86                                    | 131   | 87.6 | 107  | 0.82 | 5.57   | 0.0960 | 0.0016 | 3.5605  | 0.0746 | 0.2685 | 0.0035 | 0.6206 | 1550 | 31.64 | 1541 | 16.64 | 1533 | 17.76 | 1.1   |
| 17DL05-1.1-87                                    | 151   | 144  | 157  | 0.92 | 0.00   | 0.0771 | 0.0014 | 1.9983  | 0.0460 | 0.1876 | 0.0028 | 0.6373 | 1124 | 37.04 | 1115 | 15.60 | 1108 | 14.95 | 1.4   |
| 17DL05-1.1-88                                    | 236   | 223  | 197  | 1.14 | 3.3068 | 0.0792 | 0.0016 | 2.1587  | 0.0521 | 0.1975 | 0.0029 | 0.5989 | 1177 | 36.57 | 1168 | 16.75 | 1162 | 15.37 | 1.3   |
| 17DL05-1.1-89                                    | 138   | 95.0 | 99.5 | 0.95 | 0.0000 | 0.1014 | 0.0018 | 3.7005  | 0.0799 | 0.2642 | 0.0039 | 0.6816 | 1650 | 32.56 | 1571 | 17.29 | 1511 | 19.84 | 9.2   |
| 17DL05-1.1-90                                    | 230   | 89.2 | 305  | 0.29 | 0.0000 | 0.1144 | 0.0015 | 5.2427  | 0.0970 | 0.3319 | 0.0052 | 0.8488 | 1872 | 23.30 | 1860 | 15.82 | 1847 | 25.24 | 1.3   |
| 17DL05-1.1-91                                    | 347   | 141  | 126  | 1.12 | 18.7   | 0.1650 | 0.0021 | 10.9000 | 0.1938 | 0.4785 | 0.0072 | 0.8467 | 2509 | 20.98 | 2515 | 16.63 | 2521 | 31.45 | -0.5  |
| 17DL05-1.1-92                                    | 519   | 489  | 331  | 1.48 | 0.0000 | 0.0787 | 0.0012 | 2.2480  | 0.0426 | 0.2070 | 0.0027 | 0.6999 | 1165 | 25.00 | 1196 | 13.35 | 1213 | 14.68 | -3.9  |
| 17DL05-1.1-93                                    | 187   | 124  | 143  | 0.87 | 35.7   | 0.1009 | 0.0019 | 3.7718  | 0.0872 | 0.2718 | 0.0053 | 0.8503 | 1640 | 35.18 | 1587 | 18.58 | 1550 | 27.09 | 5.8   |
| 17DL05-1.1-94                                    | 168   | 168  | 133  | 1.26 | 9.14   | 0.0800 | 0.0016 | 2.1498  | 0.0512 | 0.1949 | 0.0028 | 0.6119 | 1196 | 34.25 | 1165 | 16.53 | 1148 | 15.34 | 4.2   |
| 17DL05-1.1-95                                    | 185   | 126  | 129  | 0.98 | 0.0000 | 0.0985 | 0.0017 | 3.7480  | 0.0824 | 0.2759 | 0.0044 | 0.7260 | 1598 | 31.94 | 1582 | 17.65 | 1571 | 22.26 | 1.8   |
| 17DL05-1.1-96                                    | 257   | 143  | 224  | 0.64 | 0.0000 | 0.1064 | 0.0012 | 4.5259  | 0.0781 | 0.3083 | 0.0042 | 0.7973 | 1739 | 22.07 | 1736 | 14.40 | 1732 | 20.92 | 0.4   |
| 17DL05-1.1-97                                    | 288   | 244  | 341  | 0.72 | 0.0000 | 0.0810 | 0.0011 | 2.2991  | 0.0462 | 0.2058 | 0.0032 | 0.7814 | 1220 | 26.39 | 1212 | 14.24 | 1207 | 17.28 | 1.1   |
| 17DL05-1.1-98                                    | 276   | 108  | 105  | 1.03 | 0.0000 | 0.1689 | 0.0020 | 11.1669 | 0.2209 | 0.4789 | 0.0075 | 0.7951 | 2547 | 20.37 | 2537 | 18.52 | 2523 | 32.87 | 1.0   |
| 17DL05-1.1-99                                    | 204   | 125  | 120  | 1.04 | 12.2   | 0.1086 | 0.0018 | 4.5836  | 0.0849 | 0.3065 | 0.0040 | 0.7098 | 1776 | 29.63 | 1746 | 15.48 | 1723 | 19.90 | 3.1   |
| 17DL05-1.1-100                                   | 194   | 137  | 137  | 1.00 | 19.0   | 0.0960 | 0.0018 | 3.5945  | 0.0791 | 0.2717 | 0.0038 | 0.6340 | 1547 | 30.56 | 1548 | 17.50 | 1550 | 19.23 | -0.2  |
| Rejected analyses (discordant > 10%, error > 5%) |       |      |      |      |        |        |        |         |        |        |        |        |      |       |      |       |      |       |       |
| 17DL05-1.1-52                                    | 942   | 920  | 413  | 2.23 | 27.2   | 0.0763 | 0.0011 | 2.2216  | 0.0406 | 0.2111 | 0.0026 | 0.6843 | 1103 | 27.78 | 1188 | 12.81 | 1235 | 14.05 | -10.7 |
| 17DL05-1.1-54                                    | 127   | 117  | 121  | 0.97 | 10.0   | 0.0726 | 0.0014 | 1.9865  | 0.0464 | 0.1985 | 0.0028 | 0.6090 | 1011 | 38.59 | 1111 | 15.80 | 1167 | 15.21 | -13.4 |

**Sample17DL07-1 (39°00'59.56"N , 121°47'23.48"E)**  
*Detrital zircons*

|             |     |      |      |      |        |        |        |         |        |        |        |        |      |       |      |       |      |       |       |
|-------------|-----|------|------|------|--------|--------|--------|---------|--------|--------|--------|--------|------|-------|------|-------|------|-------|-------|
| 17DL07-1-01 | 281 | 128  | 441  | 0.29 | 18.7   | 0.1019 | 0.0009 | 4.1641  | 0.0799 | 0.2966 | 0.0055 | 0.9645 | 1658 | 16.51 | 1667 | 15.75 | 1674 | 27.31 | -1.0  |
| 17DL07-1-02 | 217 | 83.3 | 362  | 0.23 | 0.0000 | 0.1140 | 0.0011 | 4.7219  | 0.0723 | 0.3004 | 0.0043 | 0.9439 | 1865 | 17.28 | 1771 | 12.89 | 1693 | 21.54 | 10.1  |
| 17DL07-1-03 | 190 | 154  | 263  | 0.59 | 2.49   | 0.0829 | 0.0008 | 2.5176  | 0.0523 | 0.2203 | 0.0044 | 0.9577 | 1278 | 18.52 | 1277 | 15.12 | 1284 | 23.16 | -0.4  |
| 17DL07-1-04 | 137 | 136  | 135  | 1.01 | 0.0000 | 0.0798 | 0.0010 | 2.2263  | 0.0487 | 0.2022 | 0.0038 | 0.8540 | 1194 | 24.07 | 1189 | 15.34 | 1187 | 20.25 | 0.6   |
| 17DL07-1-05 | 176 | 101  | 128  | 0.79 | 0.0000 | 0.1120 | 0.0012 | 5.2695  | 0.0889 | 0.3413 | 0.0046 | 0.8041 | 1831 | 18.68 | 1864 | 14.45 | 1893 | 22.27 | -3.3  |
| 17DL07-1-06 | 388 | 329  | 271  | 1.21 | 19.1   | 0.0880 | 0.0008 | 2.9518  | 0.0571 | 0.2433 | 0.0042 | 0.8863 | 1383 | 23.15 | 1395 | 14.71 | 1404 | 21.65 | -1.5  |
| 17DL07-1-07 | 192 | 119  | 164  | 0.72 | 9.87   | 0.1005 | 0.0008 | 4.1379  | 0.0676 | 0.2988 | 0.0045 | 0.9236 | 1633 | 16.51 | 1662 | 13.41 | 1686 | 22.41 | -3.1  |
| 17DL07-1-08 | 179 | 102  | 173  | 0.59 | 0.0000 | 0.1093 | 0.0010 | 4.5709  | 0.0755 | 0.3033 | 0.0044 | 0.8686 | 1788 | 16.67 | 1744 | 13.81 | 1708 | 21.55 | 4.7   |
| 17DL07-1-09 | 457 | 205  | 196  | 1.05 | 11.2   | 0.1608 | 0.0013 | 10.2028 | 0.1878 | 0.4600 | 0.0076 | 0.9007 | 2465 | 14.97 | 2453 | 17.10 | 2440 | 33.69 | 1.0   |
| 17DL07-1-10 | 337 | 231  | 263  | 0.88 | 0.0000 | 0.0993 | 0.0009 | 3.8549  | 0.0784 | 0.2815 | 0.0050 | 0.8667 | 1610 | 16.67 | 1604 | 16.43 | 1599 | 24.97 | 0.7   |
| 17DL07-1-11 | 213 | 148  | 159  | 0.93 | 41.6   | 0.0993 | 0.0010 | 3.8023  | 0.0751 | 0.2779 | 0.0049 | 0.8859 | 1611 | 17.44 | 1593 | 15.91 | 1581 | 24.53 | 1.9   |
| 17DL07-1-12 | 324 | 313  | 297  | 1.05 | 0.0000 | 0.0802 | 0.0009 | 2.2993  | 0.0512 | 0.2077 | 0.0035 | 0.7559 | 1267 | 22.22 | 1212 | 15.78 | 1216 | 18.67 | 4.1   |
| 17DL07-1-13 | 111 | 81.2 | 106  | 0.76 | 16.0   | 0.0906 | 0.0012 | 3.1999  | 0.0715 | 0.2568 | 0.0052 | 0.9000 | 1439 | 24.85 | 1457 | 17.31 | 1474 | 26.50 | -2.4  |
| 17DL07-1-14 | 246 | 167  | 318  | 0.53 | 17.4   | 0.0892 | 0.0010 | 3.0476  | 0.0569 | 0.2477 | 0.0034 | 0.7254 | 1409 | 20.83 | 1420 | 14.31 | 1427 | 17.36 | -1.2  |
| 17DL07-1-15 | 509 | 334  | 313  | 1.06 | 15.1   | 0.1018 | 0.0008 | 4.2067  | 0.0682 | 0.2999 | 0.0046 | 0.9383 | 1658 | 14.35 | 1675 | 13.35 | 1691 | 22.64 | -2.0  |
| 17DL07-1-16 | 107 | 105  | 97.6 | 1.07 | 45.7   | 0.0794 | 0.0013 | 2.1334  | 0.0449 | 0.1954 | 0.0032 | 0.7694 | 1181 | 31.48 | 1160 | 14.58 | 1151 | 17.09 | 2.6   |
| 17DL07-1-17 | 182 | 125  | 138  | 0.91 | 0.0000 | 0.1006 | 0.0014 | 3.7104  | 0.0633 | 0.2682 | 0.0038 | 0.8342 | 1635 | 25.92 | 1574 | 13.69 | 1532 | 19.43 | 6.8   |
| 17DL07-1-18 | 199 | 236  | 131  | 1.80 | 0.32   | 0.0770 | 0.0012 | 1.8984  | 0.0413 | 0.1795 | 0.0035 | 0.9013 | 1120 | 25.00 | 1081 | 14.48 | 1064 | 19.24 | 5.3   |
| 17DL07-1-19 | 155 | 147  | 197  | 0.75 | 0.0000 | 0.0775 | 0.0010 | 2.0184  | 0.0421 | 0.1890 | 0.0031 | 0.7886 | 1144 | 25.93 | 1122 | 14.20 | 1116 | 16.88 | 2.6   |
| 17DL07-1-20 | 209 | 145  | 143  | 1.01 | 11.2   | 0.0983 | 0.0012 | 3.8212  | 0.0841 | 0.2817 | 0.0048 | 0.7785 | 1592 | 22.53 | 1597 | 17.74 | 1600 | 24.29 | -0.5  |
| 17DL07-1-21 | 412 | 248  | 356  | 0.70 | 10.1   | 0.1038 | 0.0009 | 4.3402  | 0.0871 | 0.3035 | 0.0057 | 0.9440 | 1694 | 16.36 | 1701 | 16.60 | 1708 | 28.44 | -0.8  |
| 17DL07-1-23 | 245 | 179  | 165  | 1.09 | 0.0000 | 0.0976 | 0.0010 | 3.8320  | 0.0721 | 0.2850 | 0.0047 | 0.8786 | 1589 | 18.52 | 1599 | 15.19 | 1617 | 23.65 | -1.7  |
| 17DL07-1-25 | 195 | 140  | 88.5 | 1.58 | 24.2   | 0.1006 | 0.0012 | 4.0929  | 0.0909 | 0.2953 | 0.0055 | 0.8389 | 1635 | 22.22 | 1653 | 18.15 | 1668 | 27.38 | -2.0  |
| 17DL07-1-26 | 137 | 71.9 | 145  | 0.50 | 20.5   | 0.1077 | 0.0011 | 4.7271  | 0.0775 | 0.3189 | 0.0050 | 0.9514 | 1761 | 22.69 | 1772 | 13.79 | 1784 | 24.33 | -1.3  |
| 17DL07-1-27 | 578 | 248  | 171  | 1.45 | 0.0000 | 0.1805 | 0.0014 | 12.1426 | 0.1937 | 0.4882 | 0.0067 | 0.8580 | 2657 | 12.96 | 2615 | 15.07 | 2563 | 28.98 | 3.7   |
| 17DL07-1-28 | 111 | 86.0 | 66.5 | 1.29 | 11.70  | 0.0967 | 0.0018 | 3.4853  | 0.0807 | 0.2626 | 0.0046 | 0.7640 | 1561 | 35.50 | 1524 | 18.29 | 1503 | 23.71 | 3.9   |
| 17DL07-1-29 | 97  | 75.5 | 200  | 0.38 | 16.4   | 0.0766 | 0.0010 | 2.0232  | 0.0403 | 0.1917 | 0.0030 | 0.7744 | 1122 | 24.85 | 1123 | 13.55 | 1131 | 16.00 | -0.7  |
| 17DL07-1-30 | 153 | 108  | 113  | 0.95 | 20.1   | 0.0975 | 0.0015 | 3.7918  | 0.0839 | 0.2823 | 0.0045 | 0.7143 | 1577 | 29.01 | 1591 | 17.81 | 1603 | 22.45 | -1.6  |
| 17DL07-1-31 | 231 | 61.8 | 374  | 0.17 | 12.6   | 0.1190 | 0.0010 | 6.0103  | 0.1144 | 0.3667 | 0.0064 | 0.9138 | 1943 | 19.44 | 1977 | 16.62 | 2014 | 30.10 | -3.5  |
| 17DL07-1-32 | 148 | 99.2 | 36.4 | 2.73 | 0.0000 | 0.1197 | 0.0023 | 5.6741  | 0.1555 | 0.3436 | 0.0062 | 0.6633 | 1954 | 34.42 | 1927 | 23.69 | 1904 | 29.98 | 2.6   |
| 17DL07-1-33 | 420 | 253  | 202  | 1.25 | 4.38   | 0.1123 | 0.0010 | 5.2849  | 0.0927 | 0.3416 | 0.0050 | 0.8308 | 1837 | 16.52 | 1866 | 15.02 | 1894 | 23.93 | -3.0  |
| 17DL07-1-34 | 336 | 206  | 263  | 0.78 | 0.0000 | 0.1036 | 0.0011 | 4.5128  | 0.0854 | 0.3168 | 0.0055 | 0.9200 | 1700 | 19.91 | 1733 | 15.78 | 1774 | 27.03 | -4.2  |
| 17DL07-1-35 | 162 | 116  | 200  | 0.58 | 0.0000 | 0.0890 | 0.0011 | 2.9096  | 0.0609 | 0.2372 | 0.0038 | 0.7625 | 1403 | 23.61 | 1384 | 15.84 | 1372 | 19.73 | 2.3   |
| 17DL07-1-36 | 193 | 124  | 181  | 0.69 | 0.0000 | 0.0984 | 0.0011 | 3.8436  | 0.0748 | 0.2839 | 0.0047 | 0.8525 | 1594 | 20.83 | 1602 | 15.73 | 1611 | 23.68 | -1.0  |
| 17DL07-1-38 | 544 | 335  | 360  | 0.93 | 0.0000 | 0.1043 | 0.0009 | 4.4530  | 0.0801 | 0.3097 | 0.0046 | 0.8326 | 1703 | 15.12 | 1722 | 14.95 | 1739 | 22.84 | -2.1  |
| 17DL07-1-39 | 296 | 288  | 168  | 1.71 | 0.00   | 0.0780 | 0.0018 | 2.3625  | 0.0716 | 0.2196 | 0.0040 | 0.5939 | 1147 | 44.91 | 1231 | 21.65 | 1280 | 20.92 | -10.4 |
| 17DL07-1-40 | 102 | 75.6 | 125  | 0.61 | 0.0000 | 0.0882 | 0.0012 | 2.8711  | 0.0556 | 0.2371 | 0.0041 | 0.9019 | 1387 | 25.93 | 1374 | 14.62 | 1372 | 21.60 | 1.1   |
| 17DL07-1-41 | 214 | 103  | 52.7 | 1.95 | 0.0000 | 0.1624 | 0.0016 | 10.1161 | 0.1671 | 0.4527 | 0.0064 | 0.8612 | 2481 | 16.52 | 2445 | 15.35 | 2407 | 28.60 | 3.1   |
| 17DL07-1-42 | 75  | 50.7 | 58.3 | 0.87 | 17.3   | 0.1034 | 0.0016 | 4.0110  | 0.0979 | 0.2815 | 0.0049 | 0.7070 | 1687 | 28.24 | 1636 | 19.87 | 1599 | 24.45 | 5.5   |
| 17DL07-1-43 | 198 | 135  | 204  | 0.66 | 0.0000 | 0.0959 | 0.0011 | 3.4646  | 0.0639 | 0.2621 | 0.0035 | 0.7242 | 1546 | 20.68 | 1519 | 14.56 | 1501 | 17.89 | 3.0   |
| 17DL07-1-44 | 883 | 672  | 543  | 1.24 | 45.8   | 0.0998 | 0.0009 | 3.6094  | 0.0575 | 0.2626 | 0.0039 | 0.9343 | 1621 | 17.75 | 1552 | 12.72 | 1503 | 19.98 | 7.8   |
| 17DL07-1-45 | 262 | 118  | 294  | 0.40 | 0.0000 | 0.1209 | 0.0017 | 5.6541  | 0.0796 | 0.3414 | 0.0051 | 1.0562 | 1969 | 25.31 | 1924 | 12.22 | 1893 | 24.43 | 4.0   |

|             |       |      |      |      |        |        |        |         |        |        |        |        |      |       |      |       |      |       |      |
|-------------|-------|------|------|------|--------|--------|--------|---------|--------|--------|--------|--------|------|-------|------|-------|------|-------|------|
| 17DL07-1-46 | 189   | 137  | 124  | 1.11 | 5.40   | 0.0981 | 0.0010 | 3.7263  | 0.0711 | 0.2756 | 0.0044 | 0.8306 | 1591 | 19.91 | 1577 | 15.31 | 1569 | 22.09 | 1.4  |
| 17DL07-1-47 | 354   | 234  | 281  | 0.84 | 0.0000 | 0.1013 | 0.0009 | 4.1205  | 0.0832 | 0.2950 | 0.0050 | 0.8340 | 1648 | 16.67 | 1658 | 16.54 | 1666 | 24.75 | -1.1 |
| 17DL07-1-48 | 465   | 322  | 656  | 0.49 | 13.5   | 0.0869 | 0.0009 | 2.8199  | 0.0484 | 0.2357 | 0.0035 | 0.8625 | 1358 | 25.00 | 1361 | 12.90 | 1364 | 18.22 | -0.5 |
| 17DL07-1-49 | 139   | 88.9 | 66.9 | 1.33 | 2.4    | 0.1115 | 0.0024 | 5.0956  | 0.1515 | 0.3316 | 0.0061 | 0.6173 | 1833 | 39.81 | 1835 | 25.27 | 1846 | 29.48 | -0.7 |
| 17DL07-1-50 | 311   | 174  | 141  | 1.23 | 1.49   | 0.1217 | 0.0017 | 6.6029  | 0.1676 | 0.3934 | 0.0079 | 0.7897 | 1983 | 19.91 | 2060 | 22.42 | 2139 | 36.50 | -7.3 |
| 17DL07-1-51 | 222   | 184  | 125  | 1.48 | 11.4   | 0.0931 | 0.0015 | 3.2337  | 0.0694 | 0.2524 | 0.0041 | 0.7582 | 1500 | 30.71 | 1465 | 16.68 | 1451 | 21.17 | 3.4  |
| 17DL07-1-52 | 236   | 188  | 139  | 1.36 | 21.4   | 0.0943 | 0.0015 | 3.5534  | 0.0828 | 0.2735 | 0.0051 | 0.7931 | 1517 | 31.33 | 1539 | 18.49 | 1559 | 25.59 | -2.7 |
| 17DL07-1-53 | 329   | 251  | 171  | 1.47 | 0.0000 | 0.0983 | 0.0014 | 3.8894  | 0.0810 | 0.2871 | 0.0047 | 0.7836 | 1592 | 25.93 | 1611 | 16.86 | 1627 | 23.49 | -2.1 |
| 17DL07-1-54 | 240   | 169  | 157  | 1.07 | 0.0000 | 0.1007 | 0.0012 | 4.1031  | 0.0788 | 0.2952 | 0.0041 | 0.7308 | 1637 | 21.91 | 1655 | 15.72 | 1667 | 20.64 | -1.8 |
| 17DL07-1-55 | 185   | 128  | 146  | 0.88 | 0.00   | 0.1011 | 0.0014 | 3.7613  | 0.0683 | 0.2700 | 0.0040 | 0.8063 | 1644 | 25.31 | 1585 | 14.61 | 1541 | 20.09 | 6.7  |
| 17DL07-1-56 | 124   | 97.8 | 74.7 | 1.31 | 16.9   | 0.0930 | 0.0014 | 3.3814  | 0.0623 | 0.2643 | 0.0040 | 0.8179 | 1489 | 28.24 | 1500 | 14.48 | 1512 | 20.32 | -1.5 |
| 17DL07-1-57 | 253   | 155  | 241  | 0.64 | 3.00   | 0.1007 | 0.0011 | 4.1533  | 0.0891 | 0.2984 | 0.0051 | 0.8024 | 1639 | 19.91 | 1665 | 17.59 | 1684 | 25.52 | -2.7 |
| 17DL07-1-58 | 229   | 158  | 155  | 1.02 | 35.7   | 0.0979 | 0.0012 | 3.8979  | 0.0691 | 0.2886 | 0.0039 | 0.7605 | 1584 | 22.99 | 1613 | 14.37 | 1635 | 19.49 | -3.1 |
| 17DL07-1-59 | 316   | 266  | 539  | 0.49 | 0.0000 | 0.0751 | 0.0007 | 2.0640  | 0.0375 | 0.1991 | 0.0033 | 0.9040 | 1072 | 23.15 | 1137 | 12.45 | 1170 | 17.59 | -8.4 |
| 17DL07-1-60 | 103   | 101  | 93.9 | 1.08 | 0.0000 | 0.0763 | 0.0013 | 2.0578  | 0.0455 | 0.1957 | 0.0033 | 0.7559 | 1103 | 1.70  | 1135 | 15.12 | 1152 | 17.64 | -4.3 |
| 17DL07-1-61 | 133   | 97.5 | 94.1 | 1.04 | 0.0000 | 0.0954 | 0.0013 | 3.5963  | 0.0849 | 0.2731 | 0.0050 | 0.7710 | 1536 | 26.39 | 1549 | 18.79 | 1556 | 25.19 | -1.3 |
| 17DL07-1-62 | 69.1  | 47.7 | 77.8 | 0.61 | 12.1   | 0.0902 | 0.0015 | 3.1471  | 0.0673 | 0.2535 | 0.0043 | 0.7872 | 1429 | 31.48 | 1444 | 16.51 | 1456 | 21.96 | -1.8 |
| 17DL07-1-63 | 268   | 198  | 175  | 1.13 | 24.4   | 0.0964 | 0.0011 | 3.6897  | 0.0608 | 0.2779 | 0.0042 | 0.9244 | 1555 | 15.90 | 1569 | 13.20 | 1581 | 21.36 | -1.6 |
| 17DL07-1-64 | 123   | 104  | 137  | 0.76 | 0.0000 | 0.0864 | 0.0013 | 2.5639  | 0.0575 | 0.2153 | 0.0035 | 0.7181 | 1346 | 29.63 | 1290 | 16.41 | 1257 | 18.41 | 7.1  |
| 17DL07-1-65 | 120   | 72.4 | 188  | 0.38 | 0.0000 | 0.0892 | 0.0009 | 3.1167  | 0.0505 | 0.2534 | 0.0034 | 0.8287 | 1409 | 19.75 | 1437 | 12.50 | 1456 | 17.52 | -3.2 |
| 17DL07-1-66 | 99    | 73.1 | 57.3 | 1.28 | 1.91   | 0.0968 | 0.0015 | 3.6120  | 0.0698 | 0.2709 | 0.0035 | 0.6607 | 1563 | 29.93 | 1552 | 15.41 | 1546 | 17.57 | 1.1  |
| 17DL07-1-67 | 156   | 92.8 | 85.0 | 1.09 | 0.0000 | 0.1134 | 0.0013 | 5.3075  | 0.1003 | 0.3393 | 0.0051 | 0.7995 | 1855 | 20.37 | 1870 | 16.20 | 1883 | 24.70 | -1.5 |
| 17DL07-1-68 | 258   | 95.2 | 164  | 0.58 | 0.0000 | 0.1614 | 0.0014 | 10.4427 | 0.1627 | 0.4693 | 0.0063 | 0.8585 | 2470 | 14.82 | 2475 | 14.54 | 2480 | 27.58 | -0.4 |
| 17DL07-1-69 | 131   | 96.3 | 153  | 0.63 | 27.7   | 0.0891 | 0.0011 | 2.9478  | 0.0493 | 0.2403 | 0.0033 | 0.8226 | 1406 | 24.08 | 1394 | 12.70 | 1388 | 17.18 | 1.3  |
| 17DL07-1-70 | 511   | 323  | 290  | 1.12 | 0.0000 | 0.1053 | 0.0011 | 4.5365  | 0.0733 | 0.3128 | 0.0043 | 0.8551 | 1720 | 19.91 | 1738 | 13.50 | 1755 | 21.25 | -1.9 |
| 17DL07-1-71 | 107.1 | 37.9 | 323  | 0.12 | 42.7   | 0.0886 | 0.0018 | 3.1616  | 0.1485 | 0.2535 | 0.0081 | 0.6823 | 1398 | 34.26 | 1448 | 36.25 | 1457 | 41.80 | -4.0 |
| 17DL07-1-72 | 138   | 91.4 | 115  | 0.80 | 0.0000 | 0.0991 | 0.0013 | 3.8884  | 0.0743 | 0.2854 | 0.0048 | 0.8876 | 1607 | 24.23 | 1611 | 15.48 | 1619 | 24.31 | -0.7 |
| 17DL07-1-73 | 122   | 70.5 | 154  | 0.46 | 16.8   | 0.0989 | 0.0013 | 3.7590  | 0.0731 | 0.2756 | 0.0038 | 0.7160 | 1606 | 23.92 | 1584 | 15.63 | 1569 | 19.41 | 2.3  |
| 17DL07-1-75 | 170   | 187  | 122  | 1.53 | 0.0000 | 0.0780 | 0.0013 | 2.0154  | 0.0398 | 0.1877 | 0.0023 | 0.6157 | 1148 | 30.56 | 1121 | 13.41 | 1109 | 12.39 | 3.5  |
| 17DL07-1-76 | 224   | 143  | 136  | 1.06 | 18.0   | 0.1038 | 0.0011 | 4.3025  | 0.0820 | 0.3003 | 0.0042 | 0.7424 | 1694 | 20.37 | 1694 | 15.74 | 1693 | 21.08 | 0.1  |
| 17DL07-1-77 | 139   | 90.8 | 116  | 0.78 | 0.86   | 0.1022 | 0.0016 | 4.0114  | 0.0783 | 0.2850 | 0.0039 | 0.6939 | 1665 | 28.86 | 1637 | 15.90 | 1617 | 19.38 | 3.0  |
| 17DL07-1-78 | 283   | 190  | 149  | 1.27 | 4.90   | 0.1051 | 0.0012 | 4.3793  | 0.0784 | 0.3034 | 0.0052 | 0.9547 | 1717 | 20.68 | 1708 | 14.85 | 1708 | 25.67 | 0.5  |
| 17DL07-1-79 | 211   | 120  | 195  | 0.61 | 0.0000 | 0.1030 | 0.0011 | 4.3234  | 0.0821 | 0.3045 | 0.0047 | 0.8164 | 1680 | 19.76 | 1698 | 15.71 | 1714 | 23.35 | -2.0 |
| 17DL07-1-80 | 110   | 100  | 105  | 0.95 | 7.49   | 0.0795 | 0.0012 | 2.2836  | 0.0510 | 0.2083 | 0.0032 | 0.6967 | 1187 | 30.71 | 1207 | 15.81 | 1220 | 17.32 | -2.7 |
| 17DL07-1-81 | 113   | 87.0 | 127  | 0.68 | 0.0000 | 0.0839 | 0.0013 | 2.7226  | 0.0573 | 0.2353 | 0.0033 | 0.6599 | 1300 | 29.63 | 1335 | 15.65 | 1362 | 17.07 | -4.6 |
| 17DL07-1-82 | 127   | 67.6 | 142  | 0.48 | 0.0000 | 0.1072 | 0.0015 | 4.2719  | 0.0725 | 0.2893 | 0.0032 | 0.6420 | 1754 | 24.54 | 1688 | 14.02 | 1638 | 15.79 | 7.1  |
| 17DL07-1-83 | 215   | 131  | 202  | 0.65 | 0.0000 | 0.0976 | 0.0011 | 4.0059  | 0.0622 | 0.2983 | 0.0040 | 0.8667 | 1589 | 20.37 | 1635 | 12.66 | 1683 | 19.94 | -5.6 |
| 17DL07-1-84 | 298   | 211  | 165  | 1.28 | 1.93   | 0.0993 | 0.0011 | 3.9170  | 0.0653 | 0.2870 | 0.0047 | 0.9738 | 1613 | 20.37 | 1617 | 13.53 | 1626 | 23.35 | -0.8 |
| 17DL07-1-85 | 401   | 253  | 188  | 1.35 | 6.87   | 0.1067 | 0.0011 | 4.8180  | 0.0783 | 0.3277 | 0.0043 | 0.8001 | 1744 | 19.60 | 1788 | 13.72 | 1827 | 20.71 | -4.5 |
| 17DL07-1-86 | 261   | 176  | 121  | 1.45 | 10.6   | 0.1092 | 0.0013 | 4.9463  | 0.0984 | 0.3289 | 0.0055 | 0.8379 | 1787 | 22.23 | 1810 | 16.85 | 1833 | 26.62 | -2.5 |
| 17DL07-1-87 | 154   | 112  | 95.2 | 1.18 | 0.0000 | 0.0951 | 0.0013 | 3.6086  | 0.0675 | 0.2755 | 0.0036 | 0.7022 | 1529 | 24.23 | 1551 | 14.92 | 1569 | 18.32 | -2.5 |
| 17DL07-1-88 | 347   | 168  | 99.7 | 1.69 | 59.4   | 0.1550 | 0.0015 | 9.3503  | 0.1929 | 0.4377 | 0.0079 | 0.8768 | 2402 | 15.59 | 2373 | 18.99 | 2340 | 35.53 | 2.6  |

|                                                  |       |       |       |      |        |        |        |        |        |        |        |        |      |       |      |       |      |       |      |
|--------------------------------------------------|-------|-------|-------|------|--------|--------|--------|--------|--------|--------|--------|--------|------|-------|------|-------|------|-------|------|
| 17DL07-1-89                                      | 280   | 252   | 196   | 1.28 | 0.0000 | 0.0860 | 0.0010 | 2.7095 | 0.0570 | 0.2286 | 0.0039 | 0.8083 | 1339 | 23.31 | 1331 | 15.64 | 1327 | 20.42 | 0.9  |
| 17DL07-1-90                                      | 264   | 165   | 173   | 0.95 | 7.07   | 0.1071 | 0.0011 | 4.5970 | 0.0927 | 0.3111 | 0.0051 | 0.8074 | 1752 | 19.14 | 1749 | 16.85 | 1746 | 24.91 | 0.3  |
| 17DL07-1-91                                      | 336   | 238   | 181   | 1.32 | 0.0000 | 0.1023 | 0.0010 | 4.0987 | 0.0791 | 0.2911 | 0.0052 | 0.9273 | 1666 | 18.52 | 1654 | 15.78 | 1647 | 26.01 | 1.1  |
| 17DL07-1-92                                      | 135   | 88.8  | 182   | 0.49 | 0.0000 | 0.0896 | 0.0010 | 3.0334 | 0.0588 | 0.2457 | 0.0042 | 0.8796 | 1418 | 21.61 | 1416 | 14.83 | 1416 | 21.69 | 0.1  |
| 17DL07-1-93                                      | 196   | 149   | 109   | 1.37 | 0.0000 | 0.1014 | 0.0014 | 3.7534 | 0.0680 | 0.2686 | 0.0035 | 0.7162 | 1650 | 25.77 | 1583 | 14.57 | 1534 | 17.74 | 7.6  |
| 17DL07-1-94                                      | 86    | 77.3  | 84.2  | 0.92 | 17.4   | 0.0820 | 0.0013 | 2.3659 | 0.0518 | 0.2097 | 0.0038 | 0.8264 | 1256 | 31.49 | 1232 | 15.66 | 1227 | 20.24 | 2.3  |
| 17DL07-1-95                                      | 31.79 | 0.64  | 171   | 0.00 | 0.19   | 0.0782 | 0.0012 | 2.0736 | 0.0382 | 0.1924 | 0.0024 | 0.6773 | 1154 | 28.55 | 1140 | 12.63 | 1134 | 12.98 | 1.7  |
| 17DL07-1-96                                      | 189   | 109   | 172   | 0.63 | 25.5   | 0.1074 | 0.0011 | 4.4830 | 0.0726 | 0.3030 | 0.0046 | 0.9426 | 1767 | 18.52 | 1728 | 13.49 | 1706 | 22.89 | 3.6  |
| 17DL07-1-97                                      | 306   | 235   | 167   | 1.40 | 1.45   | 0.0972 | 0.0010 | 3.6298 | 0.0646 | 0.2709 | 0.0043 | 0.8894 | 1572 | 19.60 | 1556 | 14.21 | 1545 | 21.78 | 1.7  |
| 17DL07-1-98                                      | 188   | 122   | 145   | 0.84 | 8.39   | 0.1022 | 0.0011 | 4.0408 | 0.0613 | 0.2869 | 0.0040 | 0.9249 | 1665 | 14.35 | 1642 | 12.40 | 1626 | 20.19 | 2.4  |
| 17DL07-1-99                                      | 152   | 128   | 101.2 | 1.27 | 44.3   | 0.0900 | 0.0014 | 2.9476 | 0.0595 | 0.2377 | 0.0035 | 0.7384 | 1425 | 29.94 | 1394 | 15.34 | 1375 | 18.47 | 3.7  |
| 17DL07-1-100                                     | 56.7  | 43.2  | 47.3  | 0.91 | 40.2   | 0.0947 | 0.0018 | 3.1992 | 0.0841 | 0.2447 | 0.0044 | 0.6858 | 1524 | 35.34 | 1457 | 20.37 | 1411 | 22.87 | 8.0  |
| Rejected analyses (discordant > 10%, error > 5%) |       |       |       |      |        |        |        |        |        |        |        |        |      |       |      |       |      |       |      |
| 17DL07-1-22                                      | 266.3 | 55.2  | 952   | 0.06 | 10.5   | 0.1027 | 0.0009 | 3.6388 | 0.0938 | 0.2565 | 0.0058 | 0.8756 | 1674 | 20.84 | 1558 | 20.55 | 1472 | 29.70 | 13.7 |
| 17DL07-1-24                                      | 488   | 333   | 312   | 1.07 | 0.0000 | 0.0987 | 0.0008 | 3.9322 | 0.0761 | 0.2888 | 0.0049 | 0.8796 | 2000 | 14.81 | 1620 | 15.71 | 1636 | 24.61 | 22.3 |
| 17DL07-1-37                                      | 387   | 302   | 253   | 1.19 | 0.0000 | 0.0984 | 0.0021 | 3.2256 | 0.0720 | 0.2382 | 0.0040 | 0.7541 | 1595 | 40.58 | 1463 | 17.32 | 1377 | 20.88 | 15.8 |
| 17DL07-1-74                                      | 360   | 223   | 329   | 0.68 | 17.1   | 0.0988 | 0.0010 | 4.0449 | 0.0725 | 0.2973 | 0.0046 | 0.8681 | 2000 | 18.52 | 1643 | 14.64 | 1678 | 23.01 | 19.2 |
| Sample17DL09-1 (39°09'16.73"N , 122°08'57.20"E)  |       |       |       |      |        |        |        |        |        |        |        |        |      |       |      |       |      |       |      |
| Detrital zircons                                 |       |       |       |      |        |        |        |        |        |        |        |        |      |       |      |       |      |       |      |
| 17DL09-1.1-01                                    | 194   | 96.0  | 201   | 0.48 | 0.0000 | 0.1096 | 0.0015 | 4.8805 | 0.0963 | 0.3222 | 0.0051 | 0.7974 | 1794 | 24.85 | 1799 | 16.67 | 1801 | 24.74 | -0.3 |
| 17DL09-1.1-02                                    | 154   | 115.0 | 106.7 | 1.08 | 0.0000 | 0.0983 | 0.0018 | 3.6138 | 0.0768 | 0.2665 | 0.0040 | 0.7000 | 1591 | 29.47 | 1553 | 16.93 | 1523 | 20.19 | 4.5  |
| 17DL09-1.1-03                                    | 201   | 108.5 | 141.4 | 0.77 | 16.44  | 0.1283 | 0.0052 | 6.2051 | 0.3147 | 0.3470 | 0.0051 | 0.2872 | 2076 | 38.73 | 2005 | 44.37 | 1920 | 24.22 | 8.1  |
| 17DL09-1.1-04                                    | 775   | 561   | 292   | 1.92 | 0.0000 | 0.1016 | 0.0013 | 4.1759 | 0.0767 | 0.2973 | 0.0042 | 0.7686 | 1654 | 22.68 | 1669 | 15.08 | 1678 | 20.87 | -1.4 |
| 17DL09-1.1-05                                    | 179   | 124.2 | 207   | 0.60 | 17.7   | 0.0925 | 0.0015 | 3.3033 | 0.0812 | 0.2578 | 0.0039 | 0.6166 | 1480 | 26.85 | 1482 | 19.19 | 1479 | 20.05 | 0.1  |
| 17DL09-1.1-06                                    | 65.2  | 32.4  | 81.6  | 0.40 | 7.36   | 0.1067 | 0.0022 | 4.2472 | 0.0979 | 0.2884 | 0.0040 | 0.5987 | 1744 | 37.65 | 1683 | 18.97 | 1633 | 19.92 | 6.8  |
| 17DL09-1.1-07                                    | 162   | 155.6 | 161.6 | 0.96 | 5.08   | 0.0846 | 0.0013 | 2.4256 | 0.0505 | 0.2076 | 0.0031 | 0.7205 | 1306 | 30.09 | 1250 | 14.99 | 1216 | 16.63 | 7.4  |
| 17DL09-1.1-08                                    | 278   | 155.0 | 249   | 0.62 | 0.0000 | 0.1090 | 0.0014 | 4.9313 | 0.0892 | 0.3279 | 0.0050 | 0.8387 | 1783 | 23.77 | 1808 | 15.32 | 1828 | 24.18 | -2.5 |
| 17DL09-1.1-09                                    | 351   | 275   | 292   | 0.94 | 18.03  | 0.0939 | 0.0013 | 3.3239 | 0.0611 | 0.2564 | 0.0035 | 0.7416 | 1506 | 26.70 | 1487 | 14.39 | 1471 | 17.96 | 2.4  |
| 17DL09-1.1-10                                    | 179   | 141.2 | 69.9  | 2.02 | 28.4   | 0.1028 | 0.0023 | 4.0045 | 0.0903 | 0.2825 | 0.0039 | 0.6180 | 1676 | 40.90 | 1635 | 18.35 | 1604 | 19.80 | 4.5  |
| 17DL09-1.-11                                     | 142   | 129.6 | 100.7 | 1.29 | 0.0000 | 0.0852 | 0.0021 | 2.6717 | 0.0720 | 0.2273 | 0.0035 | 0.5658 | 1320 | 46.61 | 1321 | 19.92 | 1321 | 18.21 | 0.0  |
| 17DL09-1.-12                                     | 249   | 196   | 124.9 | 1.57 | 0.0000 | 0.1019 | 0.0020 | 3.7871 | 0.0800 | 0.2694 | 0.0035 | 0.6133 | 1659 | 30.56 | 1590 | 17.00 | 1538 | 17.73 | 7.9  |
| 17DL09-1.-14                                     | 153   | 169   | 135.1 | 1.25 | 38.0   | 0.0779 | 0.0021 | 1.9635 | 0.0575 | 0.1828 | 0.0030 | 0.5661 | 1144 | 47.68 | 1103 | 19.73 | 1082 | 16.54 | 5.7  |
| 17DL09-1.-15                                     | 98.2  | 79.7  | 72.4  | 1.10 | 0.0000 | 0.0932 | 0.0019 | 3.1367 | 0.0659 | 0.2438 | 0.0027 | 0.5259 | 1492 | 37.81 | 1442 | 16.21 | 1407 | 13.98 | 6.0  |
| 17DL09-1.-16                                     | 193   | 124.9 | 146.5 | 0.85 | 0.0000 | 0.1051 | 0.0016 | 4.3034 | 0.0811 | 0.2967 | 0.0045 | 0.8079 | 1717 | 28.08 | 1694 | 15.58 | 1675 | 22.49 | 2.5  |
| 17DL09-1.-17                                     | 405   | 360   | 186   | 1.94 | 0.0000 | 0.0916 | 0.0015 | 3.1885 | 0.0662 | 0.2523 | 0.0041 | 0.7851 | 1458 | 30.10 | 1454 | 16.07 | 1450 | 21.17 | 0.6  |
| 17DL09-1.-18                                     | 312   | 229   | 171.9 | 1.33 | 9.16   | 0.1062 | 0.0015 | 4.2298 | 0.0772 | 0.2882 | 0.0038 | 0.7277 | 1800 | 25.93 | 1680 | 15.04 | 1633 | 19.19 | 10.3 |
| 17DL09-1.-19                                     | 183   | 117.1 | 142.0 | 0.82 | 0.0000 | 0.1035 | 0.0015 | 4.2695 | 0.0790 | 0.2987 | 0.0043 | 0.7743 | 1687 | 26.70 | 1688 | 15.26 | 1685 | 21.25 | 0.1  |
| 17DL09-1.-20                                     | 213   | 185   | 144.9 | 1.28 | 0.0000 | 0.0907 | 0.0015 | 2.9974 | 0.0694 | 0.2386 | 0.0037 | 0.6750 | 1440 | 31.48 | 1407 | 17.65 | 1379 | 19.42 | 4.4  |
| 17DL09-1.1-21                                    | 111.6 | 87.5  | 116.3 | 0.75 | 0.0000 | 0.0887 | 0.0017 | 2.9208 | 0.0715 | 0.2379 | 0.0037 | 0.6282 | 1398 | 35.96 | 1387 | 18.55 | 1376 | 19.07 | 1.6  |
| 17DL09-1.1-22                                    | 246   | 178.5 | 159.8 | 1.12 | 0.0000 | 0.0996 | 0.0015 | 3.9038 | 0.0764 | 0.2840 | 0.0045 | 0.8130 | 1617 | 27.77 | 1614 | 15.85 | 1612 | 22.69 | 0.3  |
| 17DL09-1.1-23                                    | 82.7  | 59.7  | 47.4  | 1.26 | 0.0000 | 0.1044 | 0.0027 | 4.2783 | 0.1369 | 0.2969 | 0.0058 | 0.6151 | 1706 | 46.76 | 1689 | 26.36 | 1676 | 29.06 | 1.8  |

|               |       |       |       |      |        |        |        |         |        |        |        |        |      |       |      |       |      |       |      |
|---------------|-------|-------|-------|------|--------|--------|--------|---------|--------|--------|--------|--------|------|-------|------|-------|------|-------|------|
| 17DL09-1.1-24 | 339   | 281   | 171.1 | 1.64 | 0.0000 | 0.0964 | 0.0016 | 3.4939  | 0.0740 | 0.2626 | 0.0039 | 0.7002 | 1555 | 31.64 | 1526 | 16.76 | 1503 | 19.91 | 3.5  |
| 17DL09-1.1-25 | 108.0 | 80.6  | 63.2  | 1.27 | 0.0000 | 0.1020 | 0.0020 | 3.9795  | 0.0972 | 0.2826 | 0.0046 | 0.6728 | 1661 | 32.41 | 1630 | 19.84 | 1605 | 23.35 | 3.5  |
| 17DL09-1.1-27 | 124   | 104.5 | 89.0  | 1.17 | 0.0000 | 0.0919 | 0.0020 | 3.0949  | 0.0819 | 0.2438 | 0.0037 | 0.5801 | 1465 | 36.57 | 1431 | 20.34 | 1406 | 19.42 | 4.2  |
| 17DL09-1.1-28 | 285   | 176.5 | 237   | 0.74 | 0.0000 | 0.1055 | 0.0014 | 4.4481  | 0.0877 | 0.3056 | 0.0050 | 0.8258 | 1724 | 23.92 | 1721 | 16.40 | 1719 | 24.60 | 0.3  |
| 17DL09-1.1-29 | 167   | 125.3 | 112.5 | 1.11 | 0.0000 | 0.0990 | 0.0017 | 3.8011  | 0.0882 | 0.2782 | 0.0047 | 0.7324 | 1606 | 31.48 | 1593 | 18.68 | 1582 | 23.85 | 1.5  |
| 17DL09-1.1-30 | 486   | 399   | 231   | 1.73 | 0.0000 | 0.0964 | 0.0016 | 3.6330  | 0.0853 | 0.2734 | 0.0051 | 0.7873 | 1567 | 31.33 | 1557 | 18.72 | 1558 | 25.58 | 0.6  |
| 17DL09-1.1-31 | 145   | 109.5 | 151.3 | 0.72 | 0.0000 | 0.0953 | 0.0022 | 3.2404  | 0.0950 | 0.2461 | 0.0039 | 0.5406 | 1544 | 38.12 | 1467 | 22.77 | 1418 | 20.20 | 8.9  |
| 17DL09-1.1-32 | 202   | 160.4 | 148.5 | 1.08 | 0.90   | 0.0959 | 0.0014 | 3.5076  | 0.0762 | 0.2653 | 0.0046 | 0.7909 | 1546 | 28.09 | 1529 | 17.19 | 1517 | 23.24 | 1.9  |
| 17DL09-1.1-33 | 395   | 151.5 | 256   | 0.59 | 0.0000 | 0.1558 | 0.0026 | 9.7487  | 0.2563 | 0.4511 | 0.0075 | 0.6328 | 2411 | 27.62 | 2411 | 24.27 | 2400 | 33.37 | 0.4  |
| 17DL09-1.1-34 | 178   | 83.6  | 232   | 0.36 | 6.48   | 0.1095 | 0.0017 | 4.6532  | 0.0882 | 0.3081 | 0.0039 | 0.6699 | 1791 | 28.86 | 1759 | 15.89 | 1731 | 19.31 | 3.4  |
| 17DL09-1.1-35 | 179   | 137.6 | 128.4 | 1.07 | 0.0000 | 0.0987 | 0.0017 | 3.6848  | 0.0727 | 0.2709 | 0.0035 | 0.6512 | 1600 | 31.64 | 1568 | 15.80 | 1545 | 17.68 | 3.5  |
| 17DL09-1.1-36 | 424   | 395   | 630   | 0.63 | 8.22   | 0.0774 | 0.0010 | 2.0664  | 0.0371 | 0.1935 | 0.0026 | 0.7522 | 1131 | 30.56 | 1138 | 12.31 | 1140 | 14.13 | -0.8 |
| 17DL09-1.1-37 | 189   | 160.3 | 310   | 0.52 | 37.7   | 0.0778 | 0.0012 | 2.1546  | 0.0392 | 0.2013 | 0.0031 | 0.8469 | 1143 | 31.02 | 1167 | 12.66 | 1182 | 16.68 | -3.4 |
| 17DL09-1.1-38 | 207   | 102.2 | 72.4  | 1.41 | 0.0000 | 0.1580 | 0.0023 | 9.5736  | 0.2040 | 0.4392 | 0.0075 | 0.8019 | 2435 | 25.77 | 2395 | 19.66 | 2347 | 33.64 | 3.7  |
| 17DL09-1.1-39 | 208   | 157.8 | 123.4 | 1.28 | 4.7788 | 0.0972 | 0.0021 | 3.6998  | 0.0956 | 0.2756 | 0.0037 | 0.5155 | 1572 | 41.82 | 1571 | 20.68 | 1569 | 18.57 | 0.2  |
| 17DL09-1.1-40 | 312   | 211   | 194   | 1.09 | 12.61  | 0.1057 | 0.0016 | 4.3666  | 0.0819 | 0.2999 | 0.0044 | 0.7753 | 1728 | 27.93 | 1706 | 15.54 | 1691 | 21.65 | 2.2  |
| 17DL09-1.1-41 | 190   | 129.5 | 159.4 | 0.81 | 45.1   | 0.0966 | 0.0016 | 3.7213  | 0.0721 | 0.2795 | 0.0039 | 0.7176 | 1561 | 31.02 | 1576 | 15.54 | 1589 | 19.59 | -1.7 |
| 17DL09-1.1-42 | 157   | 154.7 | 150.1 | 1.03 | 48.1   | 0.0776 | 0.0012 | 2.1829  | 0.0477 | 0.2038 | 0.0031 | 0.6981 | 1136 | 31.48 | 1176 | 15.24 | 1196 | 16.67 | -5.0 |
| 17DL09-1.1-43 | 251   | 155.4 | 211   | 0.74 | 55.8   | 0.1041 | 0.0016 | 4.3759  | 0.0967 | 0.3048 | 0.0053 | 0.7898 | 1698 | 29.17 | 1708 | 18.29 | 1715 | 26.29 | -1.0 |
| 17DL09-1.1-44 | 257   | 323   | 103.5 | 3.12 | 0.0000 | 0.0769 | 0.0020 | 1.9549  | 0.0512 | 0.1849 | 0.0030 | 0.6222 | 1120 | 18.06 | 1100 | 17.62 | 1094 | 16.41 | 2.4  |
| 17DL09-1.1-45 | 366   | 129.1 | 238   | 0.54 | 0.0000 | 0.1716 | 0.0020 | 11.4260 | 0.2019 | 0.4829 | 0.0070 | 0.8249 | 2573 | 20.84 | 2559 | 16.59 | 2540 | 30.64 | 1.3  |
| 17DL09-1.1-46 | 319   | 258   | 239   | 1.08 | 28.9   | 0.0930 | 0.0014 | 3.2165  | 0.0657 | 0.2509 | 0.0039 | 0.7514 | 1487 | 29.47 | 1461 | 15.85 | 1443 | 19.86 | 3.1  |
| 17DL09-1.1-47 | 249   | 190   | 181.7 | 1.05 | 26.8   | 0.0966 | 0.0016 | 3.5315  | 0.0701 | 0.2651 | 0.0035 | 0.6632 | 1561 | 31.48 | 1534 | 15.74 | 1516 | 17.80 | 3.0  |
| 17DL09-1.1-49 | 157   | 106.9 | 194   | 0.55 | 16.89  | 0.0901 | 0.0016 | 3.1951  | 0.0660 | 0.2576 | 0.0037 | 0.7025 | 1428 | 33.34 | 1456 | 16.02 | 1478 | 19.19 | -3.4 |
| 17DL09-1.1-50 | 100.9 | 62.1  | 85.7  | 0.72 | 0.0000 | 0.1110 | 0.0024 | 4.6102  | 0.1088 | 0.3012 | 0.0038 | 0.5364 | 1817 | 38.58 | 1751 | 19.73 | 1697 | 18.92 | 7.0  |
| 17DL09-1.1-51 | 248   | 185   | 160.5 | 1.15 | 0.0000 | 0.0972 | 0.0017 | 3.6893  | 0.0693 | 0.2756 | 0.0037 | 0.7179 | 1572 | 31.78 | 1569 | 15.03 | 1569 | 18.79 | 0.2  |
| 17DL09-1.1-52 | 45.15 | 0.53  | 234   | 0.00 | 35.6   | 0.0800 | 0.0015 | 2.0743  | 0.0473 | 0.1878 | 0.0024 | 0.5681 | 1198 | 37.03 | 1140 | 15.64 | 1109 | 13.21 | 8.0  |
| 17DL09-1.1-53 | 87.5  | 69.0  | 66.2  | 1.04 | 12.38  | 0.0977 | 0.0025 | 3.4940  | 0.0958 | 0.2598 | 0.0039 | 0.5436 | 1581 | 47.84 | 1526 | 21.68 | 1489 | 19.84 | 6.2  |
| 17DL09-1.1-55 | 229   | 172.1 | 135.3 | 1.27 | 0.0000 | 0.0970 | 0.0016 | 3.7046  | 0.0744 | 0.2772 | 0.0036 | 0.6550 | 1566 | 26.85 | 1572 | 16.09 | 1577 | 18.42 | -0.7 |
| 17DL09-1.1-56 | 197   | 136.8 | 97.7  | 1.40 | 9.61   | 0.1080 | 0.0027 | 4.6886  | 0.1240 | 0.3161 | 0.0054 | 0.6415 | 1766 | 44.91 | 1765 | 22.16 | 1771 | 26.28 | -0.3 |
| 17DL09-1.1-57 | 247   | 270   | 174.7 | 1.55 | 0.00   | 0.0771 | 0.0016 | 2.0153  | 0.0450 | 0.1900 | 0.0025 | 0.5827 | 1124 | 42.60 | 1121 | 15.17 | 1121 | 13.40 | 0.3  |
| 17DL09-1.1-58 | 292   | 199   | 222   | 0.90 | 8.77   | 0.1006 | 0.0013 | 3.9618  | 0.0694 | 0.2858 | 0.0038 | 0.7622 | 1635 | 24.68 | 1626 | 14.25 | 1621 | 19.15 | 0.9  |
| 17DL09-1.1-59 | 283   | 284   | 244   | 1.16 | 45.0   | 0.0813 | 0.0014 | 2.2341  | 0.0508 | 0.1990 | 0.0030 | 0.6577 | 1231 | 31.94 | 1192 | 15.98 | 1170 | 16.02 | 5.3  |
| 17DL09-1.1-60 | 219   | 220   | 210   | 1.04 | 7.63   | 0.0765 | 0.0014 | 2.0415  | 0.0447 | 0.1937 | 0.0027 | 0.6447 | 1109 | 38.12 | 1129 | 14.93 | 1142 | 14.77 | -2.8 |
| 17DL09-1.1-61 | 140   | 79.9  | 107.1 | 0.75 | 0.0000 | 0.1134 | 0.0020 | 5.0444  | 0.1080 | 0.3228 | 0.0047 | 0.6836 | 1855 | 26.70 | 1827 | 18.18 | 1803 | 23.04 | 2.9  |
| 17DL09-1.1-62 | 276   | 181.9 | 235   | 0.77 | 1.43   | 0.1011 | 0.0015 | 3.9958  | 0.0750 | 0.2870 | 0.0041 | 0.7585 | 1644 | 27.78 | 1633 | 15.28 | 1627 | 20.48 | 1.1  |
| 17DL09-1.1-63 | 178   | 125.8 | 147.7 | 0.85 | 4.85   | 0.1011 | 0.0018 | 3.8113  | 0.0840 | 0.2736 | 0.0040 | 0.6635 | 1656 | 34.72 | 1595 | 17.76 | 1559 | 20.27 | 6.2  |
| 17DL09-1.1-64 | 290   | 212   | 241   | 0.88 | 0.00   | 0.0937 | 0.0020 | 3.4198  | 0.0688 | 0.2654 | 0.0034 | 0.6393 | 1502 | 40.74 | 1509 | 15.84 | 1517 | 17.41 | -1.0 |
| 17DL09-1.1-65 | 213   | 146.0 | 134.2 | 1.09 | 19.7   | 0.1076 | 0.0018 | 4.4202  | 0.0922 | 0.2979 | 0.0040 | 0.6414 | 1758 | 29.94 | 1716 | 17.32 | 1681 | 19.83 | 4.6  |
| 17DL09-1.1-66 | 370   | 302   | 184.7 | 1.63 | 0.0000 | 0.1014 | 0.0015 | 3.7690  | 0.0699 | 0.2697 | 0.0037 | 0.7442 | 1650 | 21.76 | 1586 | 14.93 | 1539 | 18.93 | 7.2  |
| 17DL09-1.1-67 | 180   | 189   | 157.1 | 1.20 | 18.8   | 0.0817 | 0.0016 | 2.2194  | 0.0613 | 0.1963 | 0.0030 | 0.5457 | 1239 | 38.27 | 1187 | 19.36 | 1155 | 15.96 | 7.2  |
| 17DL09-1.1-68 | 259   | 206   | 178.7 | 1.15 | 37.7   | 0.0962 | 0.0016 | 3.4440  | 0.0785 | 0.2596 | 0.0042 | 0.7075 | 1554 | 31.33 | 1514 | 17.97 | 1488 | 21.44 | 4.4  |

|                                                  |       |       |       |      |        |        |        |         |        |        |        |        |      |       |      |       |      |       |      |
|--------------------------------------------------|-------|-------|-------|------|--------|--------|--------|---------|--------|--------|--------|--------|------|-------|------|-------|------|-------|------|
| 17DL09-1.1-69                                    | 628   | 749   | 256   | 2.93 | 1.24   | 0.0791 | 0.0012 | 2.0827  | 0.0411 | 0.1909 | 0.0025 | 0.6525 | 1176 | 31.02 | 1143 | 13.56 | 1126 | 13.32 | 4.4  |
| 17DL09-1.1-70                                    | 195   | 204   | 192   | 1.06 | 0.0000 | 0.0795 | 0.0016 | 2.1483  | 0.0505 | 0.1965 | 0.0034 | 0.7305 | 1183 | 38.89 | 1164 | 16.29 | 1157 | 18.18 | 2.3  |
| 17DL09-1.1-71                                    | 472   | 350   | 305   | 1.15 | 0.0000 | 0.0982 | 0.0016 | 3.7371  | 0.0687 | 0.2765 | 0.0036 | 0.6998 | 1591 | 31.02 | 1579 | 14.77 | 1574 | 17.99 | 1.1  |
| 17DL09-1.1-73                                    | 157   | 159.0 | 171.9 | 0.92 | 3.82   | 0.0791 | 0.0016 | 2.1401  | 0.0473 | 0.1965 | 0.0026 | 0.5928 | 1176 | 34.26 | 1162 | 15.33 | 1157 | 13.90 | 1.7  |
| 17DL09-1.1-74                                    | 326   | 215   | 172.9 | 1.24 | 2.52   | 0.1128 | 0.0016 | 5.0364  | 0.0991 | 0.3238 | 0.0046 | 0.7252 | 1856 | 24.85 | 1825 | 16.71 | 1808 | 22.52 | 2.6  |
| 17DL09-1.1-76                                    | 83.3  | 58.2  | 55.7  | 1.05 | 0.0000 | 0.0995 | 0.0024 | 3.9067  | 0.1110 | 0.2850 | 0.0042 | 0.5161 | 1615 | 46.29 | 1615 | 23.00 | 1616 | 20.99 | -0.1 |
| 17DL09-1.1-77                                    | 177   | 125.6 | 81.6  | 1.54 | 0.0000 | 0.1034 | 0.0023 | 4.4246  | 0.1177 | 0.3104 | 0.0043 | 0.5159 | 1687 | 35.03 | 1717 | 22.06 | 1742 | 20.97 | -3.2 |
| 17DL09-1.1-78                                    | 107.4 | 72.1  | 111.2 | 0.65 | 0.0000 | 0.0938 | 0.0016 | 3.5584  | 0.0677 | 0.2756 | 0.0030 | 0.5663 | 1503 | 32.72 | 1540 | 15.11 | 1569 | 15.02 | -4.2 |
| 17DL09-1.1-79                                    | 130   | 99.2  | 98.9  | 1.00 | 0.0000 | 0.0965 | 0.0018 | 3.5485  | 0.0959 | 0.2661 | 0.0042 | 0.5904 | 1558 | 36.27 | 1538 | 21.43 | 1521 | 21.63 | 2.4  |
| 17DL09-1.1-81                                    | 331   | 142.9 | 138.7 | 1.03 | 0.0000 | 0.1617 | 0.0021 | 10.5760 | 0.2088 | 0.4748 | 0.0074 | 0.7911 | 2473 | 22.22 | 2487 | 18.39 | 2505 | 32.44 | -1.3 |
| 17DL09-1.1-82                                    | 174   | 134.3 | 109.1 | 1.23 | 10.80  | 0.0933 | 0.0016 | 3.5636  | 0.0765 | 0.2772 | 0.0037 | 0.6198 | 1494 | 33.34 | 1541 | 17.04 | 1577 | 18.62 | -5.3 |
| 17DL09-1.1-83                                    | 132   | 91.7  | 96.6  | 0.95 | 0.0000 | 0.0963 | 0.0017 | 3.8085  | 0.0824 | 0.2868 | 0.0035 | 0.5714 | 1554 | 32.87 | 1595 | 17.43 | 1626 | 17.77 | -4.4 |
| 17DL09-1.1-84                                    | 290   | 231   | 131.7 | 1.75 | 24.3   | 0.0978 | 0.0016 | 3.8153  | 0.0811 | 0.2830 | 0.0037 | 0.6174 | 1583 | 31.17 | 1596 | 17.15 | 1607 | 18.69 | -1.5 |
| 17DL09-1.1-85                                    | 337   | 205   | 220   | 0.93 | 5.68   | 0.1069 | 0.0014 | 4.7976  | 0.0838 | 0.3260 | 0.0043 | 0.7634 | 1747 | 25.16 | 1784 | 14.72 | 1819 | 21.15 | -4.0 |
| 17DL09-1.1-86                                    | 101.7 | 96.7  | 102.1 | 0.95 | 8.80   | 0.0784 | 0.0017 | 2.2776  | 0.0535 | 0.2114 | 0.0029 | 0.5852 | 1167 | 38.73 | 1205 | 16.61 | 1236 | 15.49 | -5.6 |
| 17DL09-1.1-88                                    | 202   | 201   | 191   | 1.05 | 0.0000 | 0.0791 | 0.0013 | 2.2158  | 0.0509 | 0.2028 | 0.0027 | 0.5694 | 1176 | 33.33 | 1186 | 16.08 | 1190 | 14.22 | -1.2 |
| 17DL09-1.1-89                                    | 170   | 136.4 | 90.1  | 1.51 | 0.0000 | 0.0949 | 0.0017 | 3.5723  | 0.0966 | 0.2720 | 0.0049 | 0.6638 | 1528 | 33.34 | 1543 | 21.49 | 1551 | 24.77 | -1.5 |
| 17DL09-1.1-90                                    | 300   | 221   | 178   | 1.24 | 0.0000 | 0.0997 | 0.0014 | 3.9470  | 0.0739 | 0.2873 | 0.0040 | 0.7421 | 1618 | 24.54 | 1623 | 15.22 | 1628 | 20.02 | -0.6 |
| 17DL09-1.1-91                                    | 151   | 111.0 | 100.4 | 1.11 | 0.0000 | 0.0997 | 0.0017 | 3.8505  | 0.0806 | 0.2803 | 0.0040 | 0.6739 | 1618 | 31.48 | 1603 | 16.91 | 1593 | 19.93 | 1.5  |
| 17DL09-1.1-92                                    | 293   | 215   | 146.2 | 1.47 | 15.22  | 0.1038 | 0.0016 | 4.3023  | 0.0883 | 0.3006 | 0.0044 | 0.7198 | 1694 | 28.24 | 1694 | 16.94 | 1695 | 22.03 | 0.0  |
| 17DL09-1.1-93                                    | 226   | 154.0 | 147.9 | 1.04 | 0.0000 | 0.1055 | 0.0014 | 4.3651  | 0.0840 | 0.2999 | 0.0047 | 0.8083 | 1724 | 23.76 | 1706 | 15.94 | 1691 | 23.16 | 2.0  |
| 17DL09-1.1-94                                    | 224   | 191   | 340   | 0.56 | 0.0000 | 0.0785 | 0.0010 | 2.2296  | 0.0444 | 0.2056 | 0.0031 | 0.7463 | 1159 | 19.44 | 1190 | 13.98 | 1205 | 16.35 | -3.9 |
| 17DL09-1.1-95                                    | 153   | 100.9 | 141.0 | 0.72 | 0.0000 | 0.0978 | 0.0015 | 3.7986  | 0.0783 | 0.2812 | 0.0040 | 0.6940 | 1583 | 28.39 | 1592 | 16.60 | 1597 | 20.25 | -0.9 |
| 17DL09-1.1-96                                    | 207   | 140.2 | 111.9 | 1.25 | 17.3   | 0.1063 | 0.0013 | 4.5562  | 0.0794 | 0.3102 | 0.0042 | 0.7724 | 1739 | 22.22 | 1741 | 14.56 | 1742 | 20.57 | -0.2 |
| 17DL09-1.1-97                                    | 256   | 137.8 | 224   | 0.62 | 6.44   | 0.1099 | 0.0013 | 4.9565  | 0.0786 | 0.3267 | 0.0044 | 0.8420 | 1798 | 22.06 | 1812 | 13.46 | 1822 | 21.23 | -1.3 |
| 17DL09-1.1-98                                    | 135   | 89.6  | 83.9  | 1.07 | 1.55   | 0.1072 | 0.0021 | 4.4308  | 0.0962 | 0.2998 | 0.0045 | 0.6885 | 1752 | 35.34 | 1718 | 18.02 | 1690 | 22.24 | 3.6  |
| 17DL09-1.1-99                                    | 147   | 157.8 | 116.9 | 1.35 | 11.04  | 0.0776 | 0.0015 | 2.1104  | 0.0491 | 0.1967 | 0.0028 | 0.6093 | 1137 | 37.35 | 1152 | 16.04 | 1157 | 15.03 | -1.8 |
| 17DL09-1.1-100                                   | 131   | 82.6  | 95.6  | 0.86 | 0.0000 | 0.1061 | 0.0018 | 4.5224  | 0.0996 | 0.3087 | 0.0050 | 0.7386 | 1800 | 31.33 | 1735 | 18.35 | 1734 | 24.74 | 3.8  |
| Rejected analyses (discordant > 10%, error > 5%) |       |       |       |      |        |        |        |         |        |        |        |        |      |       |      |       |      |       |      |
| 17DL09-1.-13                                     | 66.5  | 48.9  | 33.8  | 1.45 | 20.04  | 0.1110 | 0.0049 | 4.3399  | 0.1838 | 0.2840 | 0.0042 | 0.3501 | 1817 | 47.22 | 1701 | 34.97 | 1611 | 21.16 | 12.7 |
| 17DL09-1.1-26                                    | 70.5  | 76.6  | 71.8  | 1.07 | 35.2   | 0.0790 | 0.0024 | 2.0732  | 0.0682 | 0.1908 | 0.0036 | 0.5674 | 1172 | 60.65 | 1140 | 22.55 | 1126 | 19.30 | 4.1  |
| 17DL09-1.1-48                                    | 150   | 91.0  | 104.2 | 0.87 | 37.15  | 0.1016 | 0.0039 | 4.5176  | 0.1786 | 0.3223 | 0.0045 | 0.3517 | 1654 | 71.45 | 1734 | 32.89 | 1801 | 21.87 | -8.2 |
| 17DL09-1.1-54                                    | 179   | 207   | 68.2  | 3.03 | 26.08  | 0.0751 | 0.0027 | 2.0410  | 0.0856 | 0.1966 | 0.0036 | 0.4344 | 1072 | 72.23 | 1129 | 28.58 | 1157 | 19.30 | -7.3 |
| 17DL09-1.1-72                                    | 140   | 137.6 | 108.5 | 1.27 | 0.00   | 0.0846 | 0.0029 | 2.5701  | 0.0947 | 0.2203 | 0.0031 | 0.3856 | 1306 | 66.67 | 1292 | 26.96 | 1283 | 16.56 | 1.7  |
| 17DL09-1.1-75                                    | 199   | 144.3 | 81.8  | 1.77 | 0.0000 | 0.1069 | 0.0033 | 4.4612  | 0.1494 | 0.3024 | 0.0034 | 0.3404 | 1747 | 51.08 | 1724 | 27.81 | 1703 | 17.09 | 2.6  |
| 17DL09-1.1-80                                    | 145   | 101.6 | 104.9 | 0.97 | 0.0000 | 0.0988 | 0.0017 | 3.8908  | 0.0793 | 0.2862 | 0.0038 | 0.6590 | 2000 | 33.33 | 1612 | 16.51 | 1623 | 19.30 | 23.3 |
| 17DL09-1.1-87                                    | 56.5  | 58.9  | 56.2  | 1.05 | 0.0000 | 0.0757 | 0.0024 | 2.0165  | 0.0625 | 0.1945 | 0.0030 | 0.4943 | 1087 | 58.34 | 1121 | 21.06 | 1146 | 16.09 | -5.1 |

**Sample17DC01-1 (39°18'08"N , 122°30'50"E)**

*Detrital zircons*

|             |     |       |       |      |      |        |        |        |        |        |        |        |      |       |      |       |      |       |      |
|-------------|-----|-------|-------|------|------|--------|--------|--------|--------|--------|--------|--------|------|-------|------|-------|------|-------|------|
| 17DC01-1-01 | 185 | 129.0 | 159.4 | 0.81 | 28.2 | 0.0927 | 0.0016 | 3.3849 | 0.0931 | 0.2639 | 0.0051 | 0.7039 | 1483 | 31.94 | 1501 | 21.58 | 1510 | 26.07 | -1.8 |
|-------------|-----|-------|-------|------|------|--------|--------|--------|--------|--------|--------|--------|------|-------|------|-------|------|-------|------|

|              |       |       |       |      |        |        |        |         |        |        |        |        |      |       |      |       |      |       |      |
|--------------|-------|-------|-------|------|--------|--------|--------|---------|--------|--------|--------|--------|------|-------|------|-------|------|-------|------|
| 17DC01-1-02  | 128.0 | 77.4  | 159.8 | 0.48 | 0.0000 | 0.0961 | 0.0017 | 3.4590  | 0.0804 | 0.2608 | 0.0043 | 0.7062 | 1551 | 32.87 | 1518 | 18.33 | 1494 | 21.90 | 3.8  |
| 17DC01-1-03  | 233   | 155.6 | 182.2 | 0.85 | 0.0000 | 0.1030 | 0.0019 | 3.8841  | 0.0792 | 0.2736 | 0.0036 | 0.6479 | 1680 | 28.86 | 1610 | 16.50 | 1559 | 18.31 | 7.7  |
| 17DC01-1-04  | 279   | 270   | 243   | 1.11 | 115.9  | 0.0791 | 0.0013 | 2.1450  | 0.0440 | 0.1967 | 0.0029 | 0.7235 | 1176 | 31.94 | 1163 | 14.24 | 1158 | 15.75 | 1.6  |
| 17DC01-1-06  | 371   | 221   | 275   | 0.80 | 0.0000 | 0.1071 | 0.0014 | 4.5826  | 0.0865 | 0.3102 | 0.0045 | 0.7614 | 1750 | 22.69 | 1746 | 15.78 | 1742 | 21.95 | 0.5  |
| 17DC01-1-07  | 159.2 | 72.1  | 192   | 0.38 | 171.1  | 0.1088 | 0.0015 | 4.7354  | 0.0898 | 0.3154 | 0.0042 | 0.7032 | 1779 | 25.77 | 1774 | 15.94 | 1767 | 20.63 | 0.7  |
| 17DC01-1-08  | 121.7 | 47.0  | 64.6  | 0.73 | 98.9   | 0.1653 | 0.0028 | 10.3948 | 0.2082 | 0.4561 | 0.0057 | 0.6211 | 2510 | 28.70 | 2471 | 18.63 | 2422 | 25.15 | 3.6  |
| 17DC01-1-09  | 253   | 162.8 | 232   | 0.70 | 0.0000 | 0.1023 | 0.0014 | 3.9430  | 0.0723 | 0.2796 | 0.0039 | 0.7544 | 1666 | 25.93 | 1623 | 14.90 | 1589 | 19.51 | 4.9  |
| 17DC01-1-10  | 322   | 307   | 233   | 1.32 | 0.0000 | 0.0848 | 0.0016 | 2.5037  | 0.0568 | 0.2140 | 0.0031 | 0.6420 | 1322 | 35.65 | 1273 | 16.47 | 1250 | 16.55 | 5.8  |
| 17DC01-1-100 | 183   | 126.5 | 119.0 | 1.06 | 0.0000 | 0.0997 | 0.0020 | 3.7977  | 0.0931 | 0.2759 | 0.0045 | 0.6646 | 1618 | 38.73 | 1592 | 19.74 | 1571 | 22.73 | 3.0  |
| 17DC01-1-11  | 265   | 257   | 241   | 1.07 | 0.0000 | 0.0819 | 0.0014 | 2.2345  | 0.0514 | 0.1975 | 0.0028 | 0.6125 | 1243 | 34.11 | 1192 | 16.15 | 1162 | 14.98 | 7.0  |
| 17DC01-1-12  | 161   | 101.5 | 108.4 | 0.94 | 668    | 0.0984 | 0.0019 | 3.7679  | 0.0834 | 0.2777 | 0.0033 | 0.5430 | 1594 | 32.41 | 1586 | 17.78 | 1580 | 16.85 | 0.9  |
| 17DC01-1-13  | 292   | 204.5 | 209.2 | 0.98 | 0.0000 | 0.1013 | 0.0018 | 3.8445  | 0.0797 | 0.2756 | 0.0040 | 0.6925 | 1648 | 31.64 | 1602 | 16.74 | 1569 | 20.01 | 5.0  |
| 17DC01-1-14  | 243   | 160.8 | 180.4 | 0.89 | 121.5  | 0.0995 | 0.0019 | 4.0835  | 0.0890 | 0.2980 | 0.0041 | 0.6368 | 1615 | 30.71 | 1651 | 17.82 | 1682 | 20.57 | -4.0 |
| 17DC01-1-15  | 166   | 122.0 | 89.1  | 1.37 | 0.0000 | 0.1006 | 0.0020 | 3.8399  | 0.0879 | 0.2778 | 0.0050 | 0.7822 | 1635 | 37.03 | 1601 | 18.48 | 1580 | 25.12 | 3.5  |
| 17DC01-1-16  | 179   | 98.8  | 130.9 | 0.75 | 471    | 0.1101 | 0.0017 | 4.8680  | 0.0954 | 0.3207 | 0.0046 | 0.7394 | 1811 | 27.47 | 1797 | 16.55 | 1793 | 22.70 | 1.0  |
| 17DC01-1-17  | 362   | 241   | 277   | 0.87 | 0.0000 | 0.1017 | 0.0017 | 4.0466  | 0.0852 | 0.2889 | 0.0045 | 0.7461 | 1657 | 31.33 | 1644 | 17.19 | 1636 | 22.72 | 1.3  |
| 17DC01-1-18  | 357   | 211   | 230   | 0.92 | 102.9  | 0.1144 | 0.0017 | 5.3024  | 0.1122 | 0.3359 | 0.0050 | 0.7080 | 1872 | 27.32 | 1869 | 18.12 | 1867 | 24.30 | 0.3  |
| 17DC01-1-20  | 236   | 182.1 | 277   | 0.66 | 0.0000 | 0.0862 | 0.0015 | 2.7632  | 0.0627 | 0.2325 | 0.0035 | 0.6678 | 1343 | 33.33 | 1346 | 16.95 | 1347 | 18.45 | -0.4 |
| 17DC01-1-21  | 357   | 304   | 407   | 0.75 | 507    | 0.0819 | 0.0012 | 2.3604  | 0.0533 | 0.2088 | 0.0033 | 0.6949 | 1243 | 29.63 | 1231 | 16.12 | 1222 | 17.48 | 1.7  |
| 17DC01-1-22  | 181   | 134.1 | 91.3  | 1.47 | 0.0000 | 0.0987 | 0.0023 | 3.8509  | 0.1014 | 0.2836 | 0.0046 | 0.6135 | 1599 | 44.13 | 1603 | 21.26 | 1610 | 23.03 | -0.7 |
| 17DC01-1-23  | 329   | 314   | 320   | 0.98 | 0.0000 | 0.0807 | 0.0014 | 2.2603  | 0.0519 | 0.2036 | 0.0038 | 0.8121 | 1215 | 29.47 | 1200 | 16.17 | 1195 | 20.33 | 1.7  |
| 17DC01-1-24  | 157   | 107.1 | 117.7 | 0.91 | 0.0000 | 0.0996 | 0.0021 | 3.7718  | 0.0800 | 0.2753 | 0.0036 | 0.6158 | 1618 | 34.26 | 1587 | 17.05 | 1567 | 18.19 | 3.2  |
| 17DC01-1-25  | 532   | 392   | 355   | 1.11 | 47.3   | 0.1000 | 0.0013 | 3.7023  | 0.0657 | 0.2687 | 0.0036 | 0.7619 | 1633 | 25.46 | 1572 | 14.23 | 1534 | 18.48 | 6.5  |
| 17DC01-1-26  | 291   | 186.9 | 227   | 0.82 | 0.0000 | 0.0970 | 0.0015 | 3.9415  | 0.0825 | 0.2947 | 0.0044 | 0.7050 | 1569 | 28.55 | 1622 | 17.00 | 1665 | 21.68 | -5.8 |
| 17DC01-1-27  | 348   | 188.6 | 300   | 0.63 | 91.0   | 0.1072 | 0.0014 | 4.6890  | 0.0958 | 0.3169 | 0.0046 | 0.7049 | 1754 | 24.69 | 1765 | 17.14 | 1774 | 22.36 | -1.2 |
| 17DC01-1-28  | 334   | 301   | 334   | 0.90 | 256    | 0.0773 | 0.0013 | 2.2042  | 0.0523 | 0.2074 | 0.0043 | 0.8665 | 1131 | 35.19 | 1182 | 16.60 | 1215 | 22.79 | -6.9 |
| 17DC01-1-29  | 319   | 210   | 223   | 0.94 | 0.0000 | 0.0984 | 0.0016 | 3.9200  | 0.0911 | 0.2892 | 0.0054 | 0.7961 | 1595 | 30.40 | 1618 | 18.84 | 1638 | 26.78 | -2.6 |
| 17DC01-1-30  | 192   | 118.9 | 148.5 | 0.80 | 0.0000 | 0.1063 | 0.0020 | 4.3616  | 0.1037 | 0.2979 | 0.0047 | 0.6666 | 1739 | 35.03 | 1705 | 19.67 | 1681 | 23.47 | 3.4  |
| 17DC01-1-31  | 287   | 190.5 | 198.1 | 0.96 | 0.0000 | 0.0983 | 0.0016 | 3.9704  | 0.0817 | 0.2933 | 0.0048 | 0.8005 | 1592 | 29.32 | 1628 | 16.72 | 1658 | 24.08 | -4.0 |
| 17DC01-1-32  | 297   | 212.9 | 124.2 | 1.71 | 284    | 0.0974 | 0.0021 | 3.8150  | 0.0950 | 0.2846 | 0.0048 | 0.6825 | 1576 | 36.11 | 1596 | 20.06 | 1614 | 24.28 | -2.4 |
| 17DC01-1-33  | 214   | 114.4 | 177.3 | 0.65 | 94.5   | 0.1071 | 0.0018 | 4.8045  | 0.0874 | 0.3261 | 0.0050 | 0.8443 | 1752 | 30.25 | 1786 | 15.33 | 1819 | 24.36 | -3.7 |
| 17DC01-1-34  | 190   | 137.3 | 128.7 | 1.07 | 0.0000 | 0.0985 | 0.0017 | 3.5874  | 0.0774 | 0.2637 | 0.0034 | 0.5960 | 1596 | 31.48 | 1547 | 17.16 | 1509 | 17.32 | 5.8  |
| 17DC01-1-36  | 284   | 252   | 277   | 0.91 | 487    | 0.0822 | 0.0015 | 2.3678  | 0.0530 | 0.2092 | 0.0037 | 0.7830 | 1250 | 34.73 | 1233 | 15.99 | 1225 | 19.54 | 2.1  |
| 17DC01-1-37  | 490   | 346   | 212   | 1.63 | 0.0000 | 0.1001 | 0.0016 | 4.1388  | 0.0858 | 0.2998 | 0.0045 | 0.7184 | 1625 | 30.40 | 1662 | 17.00 | 1690 | 22.17 | -3.9 |
| 17DC01-1-38  | 264   | 209   | 169.7 | 1.23 | 384    | 0.0929 | 0.0021 | 3.0204  | 0.0876 | 0.2345 | 0.0031 | 0.4517 | 1487 | 43.06 | 1413 | 22.14 | 1358 | 16.05 | 9.5  |
| 17DC01-1-39  | 219.2 | 53.3  | 357   | 0.15 | 162.8  | 0.1218 | 0.0017 | 6.1418  | 0.1227 | 0.3654 | 0.0061 | 0.8367 | 1983 | 24.38 | 1996 | 17.50 | 2007 | 28.85 | -1.2 |
| 17DC01-1-40  | 63.8  | 35.1  | 97.8  | 0.36 | 0.0000 | 0.0934 | 0.0021 | 3.2575  | 0.0795 | 0.2529 | 0.0036 | 0.5862 | 1498 | 42.59 | 1471 | 19.00 | 1454 | 18.64 | 3.1  |
| 17DC01-1-42  | 192   | 117.1 | 132.2 | 0.89 | 0.0000 | 0.1000 | 0.0018 | 4.1273  | 0.0810 | 0.2995 | 0.0041 | 0.6928 | 1624 | 33.79 | 1660 | 16.08 | 1689 | 20.22 | -3.8 |
| 17DC01-1-43  | 181   | 75.5  | 210   | 0.36 | 219    | 0.1121 | 0.0017 | 4.9920  | 0.0983 | 0.3227 | 0.0050 | 0.7926 | 1835 | 27.47 | 1818 | 16.71 | 1803 | 24.58 | 1.8  |
| 17DC01-1-44  | 242   | 148.3 | 86.5  | 1.71 | 234    | 0.1144 | 0.0023 | 5.4152  | 0.1385 | 0.3430 | 0.0057 | 0.6484 | 1869 | 36.42 | 1887 | 21.95 | 1901 | 27.32 | -1.7 |
| 17DC01-1-45  | 197   | 123.3 | 176.3 | 0.70 | 0.0000 | 0.0984 | 0.0017 | 3.6585  | 0.0725 | 0.2692 | 0.0029 | 0.5450 | 1594 | 31.48 | 1562 | 15.83 | 1537 | 14.79 | 3.8  |
| 17DC01-1-46  | 209   | 142.5 | 212   | 0.67 | 158.6  | 0.0923 | 0.0016 | 3.2978  | 0.0694 | 0.2588 | 0.0035 | 0.6470 | 1474 | 31.48 | 1481 | 16.43 | 1484 | 18.06 | -0.7 |



|             |       |       |       |      |        |        |        |         |        |        |        |        |      |       |      |       |      |       |      |
|-------------|-------|-------|-------|------|--------|--------|--------|---------|--------|--------|--------|--------|------|-------|------|-------|------|-------|------|
| 17DC01-1-47 | 330   | 232   | 175.4 | 1.32 | 0.0000 | 0.0952 | 0.0015 | 3.7740  | 0.0878 | 0.2873 | 0.0052 | 0.7740 | 1532 | 30.41 | 1587 | 18.70 | 1628 | 25.92 | -5.9 |
| 17DC01-1-48 | 241   | 127.2 | 196.3 | 0.65 | 74.0   | 0.1094 | 0.0017 | 4.8918  | 0.0969 | 0.3245 | 0.0051 | 0.7957 | 1789 | 27.62 | 1801 | 16.75 | 1812 | 24.92 | -1.3 |
| 17DC01-1-49 | 283   | 135.1 | 287   | 0.47 | 0.0000 | 0.1063 | 0.0015 | 4.9127  | 0.1031 | 0.3354 | 0.0062 | 0.8785 | 1739 | 27.01 | 1804 | 17.74 | 1864 | 29.86 | -6.7 |
| 17DC01-1-50 | 153.2 | 30.2  | 402   | 0.08 | 5.34   | 0.0990 | 0.0012 | 3.9053  | 0.0763 | 0.2854 | 0.0040 | 0.7093 | 1606 | 22.38 | 1615 | 15.84 | 1618 | 19.86 | -0.8 |
| 17DC01-1-51 | 369   | 397   | 157.3 | 2.53 | 0.0000 | 0.0769 | 0.0018 | 2.1443  | 0.0667 | 0.2020 | 0.0038 | 0.5971 | 1118 | 15.74 | 1163 | 21.55 | 1186 | 20.13 | -5.7 |
| 17DC01-1-52 | 155   | 109.5 | 152.2 | 0.72 | 0.0000 | 0.0901 | 0.0019 | 3.0725  | 0.0747 | 0.2476 | 0.0034 | 0.5675 | 1428 | 39.66 | 1426 | 18.66 | 1426 | 17.68 | 0.1  |
| 17DC01-1-53 | 358   | 333   | 184.8 | 1.80 | 0.0000 | 0.0847 | 0.0016 | 2.4893  | 0.0520 | 0.2134 | 0.0025 | 0.5578 | 1309 | 37.04 | 1269 | 15.16 | 1247 | 13.23 | 5.0  |
| 17DC01-1-54 | 117.2 | 73.5  | 83.9  | 0.88 | 0.0000 | 0.0994 | 0.0021 | 4.1517  | 0.1036 | 0.3031 | 0.0044 | 0.5863 | 1614 | 38.89 | 1665 | 20.46 | 1707 | 21.96 | -5.4 |
| 17DC01-1-56 | 124.7 | 77.0  | 120.8 | 0.64 | 347    | 0.0919 | 0.0017 | 3.2663  | 0.0650 | 0.2586 | 0.0034 | 0.6687 | 1465 | 35.18 | 1473 | 15.51 | 1483 | 17.65 | -1.2 |
| 17DC01-1-57 | 329   | 185.8 | 160.4 | 1.16 | 0.0000 | 0.1096 | 0.0018 | 5.2455  | 0.1060 | 0.3484 | 0.0056 | 0.7937 | 1794 | 35.34 | 1860 | 17.28 | 1927 | 26.73 | -6.9 |
| 17DC01-1-58 | 203   | 112.6 | 156.2 | 0.72 | 0.0000 | 0.1050 | 0.0017 | 4.6728  | 0.0945 | 0.3234 | 0.0043 | 0.6620 | 1715 | 29.94 | 1762 | 16.96 | 1806 | 21.12 | -5.1 |
| 17DC01-1-59 | 376   | 267   | 106.7 | 2.50 | 0.0000 | 0.1024 | 0.0021 | 4.4011  | 0.1066 | 0.3139 | 0.0063 | 0.8329 | 1669 | 37.81 | 1713 | 20.07 | 1760 | 31.08 | -5.2 |
| 17DC01-1-61 | 676   | 283   | 231   | 1.22 | 181    | 0.1599 | 0.0021 | 10.5162 | 0.1855 | 0.4780 | 0.0060 | 0.7079 | 2454 | 21.91 | 2481 | 16.44 | 2518 | 26.07 | -2.6 |
| 17DC01-1-63 | 821   | 622   | 343   | 1.81 | 143.9  | 0.0940 | 0.0012 | 3.5858  | 0.0726 | 0.2775 | 0.0046 | 0.8179 | 1507 | 24.23 | 1546 | 16.10 | 1579 | 23.19 | -4.5 |
| 17DC01-1-64 | 388   | 222   | 333   | 0.67 | 493    | 0.0985 | 0.0013 | 4.0354  | 0.0841 | 0.2976 | 0.0048 | 0.7814 | 1595 | 24.07 | 1641 | 17.00 | 1679 | 24.09 | -5.0 |
| 17DC01-1-65 | 372   | 267   | 122.7 | 2.17 | 66.5   | 0.1035 | 0.0016 | 4.0899  | 0.0789 | 0.2870 | 0.0037 | 0.6607 | 1688 | 27.78 | 1652 | 15.79 | 1627 | 18.35 | 3.8  |
| 17DC01-1-67 | 222   | 149.0 | 160.1 | 0.93 | 160.7  | 0.0983 | 0.0019 | 3.8098  | 0.0822 | 0.2818 | 0.0040 | 0.6519 | 1594 | 30.71 | 1595 | 17.39 | 1600 | 19.96 | -0.4 |
| 17DC01-1-68 | 235   | 157.0 | 122.8 | 1.28 | 620    | 0.0995 | 0.0018 | 3.9539  | 0.0853 | 0.2885 | 0.0037 | 0.5901 | 1615 | 34.72 | 1625 | 17.52 | 1634 | 18.40 | -1.2 |
| 17DC01-1-69 | 181   | 105.5 | 269   | 0.39 | 55.5   | 0.0906 | 0.0015 | 3.1930  | 0.0714 | 0.2556 | 0.0036 | 0.6355 | 1439 | 32.87 | 1455 | 17.33 | 1467 | 18.67 | -1.9 |
| 17DC01-1-71 | 183   | 115.4 | 86.5  | 1.33 | 22.8   | 0.1102 | 0.0019 | 4.9361  | 0.1188 | 0.3245 | 0.0049 | 0.6304 | 1802 | 32.88 | 1808 | 20.36 | 1812 | 23.99 | -0.5 |
| 17DC01-1-72 | 242   | 233   | 220   | 1.06 | 299    | 0.0792 | 0.0014 | 2.1171  | 0.0433 | 0.1940 | 0.0026 | 0.6612 | 1177 | 35.18 | 1154 | 14.12 | 1143 | 14.17 | 3.0  |
| 17DC01-1-73 | 468   | 305   | 301   | 1.02 | 253    | 0.1007 | 0.0013 | 4.1024  | 0.0758 | 0.2960 | 0.0049 | 0.8895 | 1637 | 24.07 | 1655 | 15.12 | 1672 | 24.21 | -2.1 |
| 17DC01-1-74 | 195   | 99.8  | 179.9 | 0.55 | 138.0  | 0.1111 | 0.0020 | 5.1156  | 0.1243 | 0.3337 | 0.0053 | 0.6538 | 1818 | 33.33 | 1839 | 20.68 | 1856 | 25.65 | -2.1 |
| 17DC01-1-75 | 122.9 | 76.5  | 94.3  | 0.81 | 390    | 0.0999 | 0.0020 | 3.9350  | 0.0836 | 0.2862 | 0.0039 | 0.6392 | 1622 | 36.72 | 1621 | 17.23 | 1622 | 19.49 | 0.0  |
| 17DC01-1-76 | 44.1  | 13.98 | 102.2 | 0.14 | 129.3  | 0.0850 | 0.0017 | 2.6418  | 0.0575 | 0.2261 | 0.0034 | 0.6931 | 1317 | 38.89 | 1312 | 16.06 | 1314 | 17.95 | 0.2  |
| 17DC01-1-77 | 208   | 170.0 | 301   | 0.56 | 0.0000 | 0.0797 | 0.0015 | 2.2695  | 0.0537 | 0.2062 | 0.0030 | 0.6125 | 1191 | 35.64 | 1203 | 16.70 | 1209 | 15.99 | -1.5 |
| 17DC01-1-78 | 274   | 178.9 | 189.8 | 0.94 | 205    | 0.0974 | 0.0017 | 3.9513  | 0.0961 | 0.2943 | 0.0050 | 0.7039 | 1576 | 34.41 | 1624 | 19.74 | 1663 | 25.11 | -5.2 |
| 17DC01-1-79 | 87.3  | 63.3  | 62.4  | 1.02 | 59.0   | 0.0925 | 0.0026 | 3.3248  | 0.1078 | 0.2611 | 0.0045 | 0.5353 | 1480 | 49.08 | 1487 | 25.32 | 1495 | 23.17 | -1.1 |
| 17DC01-1-80 | 211   | 143.5 | 153.6 | 0.93 | 252    | 0.0957 | 0.0018 | 3.5660  | 0.0844 | 0.2699 | 0.0043 | 0.6679 | 1543 | 33.80 | 1542 | 18.79 | 1540 | 21.67 | 0.1  |
| 17DC01-1-81 | 178   | 85.1  | 166.7 | 0.51 | 166.0  | 0.1068 | 0.0019 | 5.0571  | 0.1120 | 0.3433 | 0.0052 | 0.6777 | 1747 | 33.34 | 1829 | 18.81 | 1902 | 24.74 | -8.2 |
| 17DC01-1-82 | 119.0 | 76.6  | 82.6  | 0.93 | 0.0000 | 0.1018 | 0.0023 | 4.0482  | 0.0922 | 0.2889 | 0.0039 | 0.5935 | 1658 | 40.90 | 1644 | 18.59 | 1636 | 19.56 | 1.3  |
| 17DC01-1-84 | 338   | 269   | 495   | 0.54 | 174.3  | 0.0777 | 0.0012 | 2.1916  | 0.0433 | 0.2043 | 0.0028 | 0.6821 | 1139 | 29.63 | 1178 | 13.78 | 1199 | 14.74 | -5.0 |
| 17DC01-1-85 | 381   | 220   | 255   | 0.86 | 216    | 0.1065 | 0.0015 | 4.7350  | 0.1028 | 0.3220 | 0.0050 | 0.7189 | 1740 | 26.54 | 1773 | 18.24 | 1799 | 24.52 | -3.3 |
| 17DC01-1-86 | 137   | 83.2  | 86.0  | 0.97 | 0.0000 | 0.1083 | 0.0026 | 4.6576  | 0.1304 | 0.3117 | 0.0046 | 0.5291 | 1770 | 42.75 | 1760 | 23.43 | 1749 | 22.71 | 1.2  |
| 17DC01-1-87 | 178   | 99.0  | 129.4 | 0.77 | 282    | 0.1089 | 0.0018 | 4.6878  | 0.0996 | 0.3121 | 0.0045 | 0.6821 | 1781 | 29.63 | 1765 | 17.83 | 1751 | 22.25 | 1.7  |
| 17DC01-1-88 | 265   | 165.3 | 196   | 0.84 | 60.2   | 0.1006 | 0.0015 | 4.1807  | 0.1141 | 0.3008 | 0.0063 | 0.7702 | 1635 | 27.78 | 1670 | 22.40 | 1695 | 31.36 | -3.5 |
| 17DC01-1-89 | 231   | 146.0 | 157.8 | 0.93 | 168.1  | 0.0985 | 0.0019 | 3.9966  | 0.0926 | 0.2944 | 0.0045 | 0.6543 | 1598 | 35.65 | 1634 | 18.85 | 1664 | 22.24 | -3.9 |
| 17DC01-1-90 | 147   | 91.2  | 108.3 | 0.84 | 433    | 0.0974 | 0.0019 | 3.8473  | 0.0885 | 0.2868 | 0.0043 | 0.6516 | 1576 | 38.12 | 1603 | 18.56 | 1626 | 21.54 | -3.1 |
| 17DC01-1-91 | 571   | 275   | 574   | 0.48 | 0.0000 | 0.1098 | 0.0014 | 5.0674  | 0.1038 | 0.3345 | 0.0057 | 0.8257 | 1795 | 22.84 | 1831 | 17.42 | 1860 | 27.35 | -3.5 |
| 17DC01-1-93 | 239   | 156.0 | 172.8 | 0.90 | 295    | 0.0949 | 0.0018 | 3.7709  | 0.0782 | 0.2886 | 0.0040 | 0.6690 | 1526 | 36.73 | 1587 | 16.68 | 1635 | 20.05 | -6.7 |
| 17DC01-1-94 | 600   | 574   | 531   | 1.08 | 0.0000 | 0.0783 | 0.0010 | 2.1738  | 0.0378 | 0.2012 | 0.0030 | 0.8437 | 1155 | 28.70 | 1173 | 12.13 | 1182 | 15.87 | -2.2 |
| 17DC01-1-95 | 204   | 136.5 | 137.4 | 0.99 | 0.0000 | 0.1011 | 0.0019 | 4.0756  | 0.1090 | 0.2909 | 0.0041 | 0.5235 | 1656 | 35.03 | 1649 | 21.84 | 1646 | 20.36 | 0.6  |

|                                                  |       |       |       |      |          |        |        |         |        |        |        |        |      |       |      |       |      |       |       |
|--------------------------------------------------|-------|-------|-------|------|----------|--------|--------|---------|--------|--------|--------|--------|------|-------|------|-------|------|-------|-------|
| 17DC01-1-96                                      | 185   | 87.8  | 202   | 0.43 | 0.0000   | 0.1113 | 0.0019 | 5.0256  | 0.0937 | 0.3275 | 0.0041 | 0.6645 | 1821 | 30.41 | 1824 | 15.84 | 1826 | 19.73 | -0.3  |
| 17DC01-1-97                                      | 161   | 46.6  | 59.9  | 0.78 | 0.0000   | 0.2414 | 0.0032 | 21.0593 | 0.3859 | 0.6315 | 0.0088 | 0.7564 | 3129 | 20.52 | 3141 | 17.89 | 3156 | 34.63 | -0.8  |
| 17DC01-1-98                                      | 82.5  | 53.5  | 41.1  | 1.30 | 0.0000   | 0.1042 | 0.0031 | 4.4300  | 0.1392 | 0.3081 | 0.0043 | 0.4426 | 1702 | 49.23 | 1718 | 26.06 | 1731 | 21.14 | -1.7  |
| 17DC01-1-99                                      | 271   | 167.6 | 134.1 | 1.25 | 559      | 0.1059 | 0.0020 | 4.6366  | 0.1104 | 0.3167 | 0.0045 | 0.5932 | 1731 | 35.34 | 1756 | 19.92 | 1774 | 21.91 | -2.4  |
| Rejected analyses (discordant > 10%, error > 5%) |       |       |       |      |          |        |        |         |        |        |        |        |      |       |      |       |      |       |       |
| 17DC01-1-05                                      | 185   | 136.7 | 111.0 | 1.23 | 129.6    | 0.1027 | 0.0025 | 3.5461  | 0.1119 | 0.2499 | 0.0040 | 0.5044 | 1674 | 46.30 | 1538 | 25.01 | 1438 | 20.53 | 16.4  |
| 17DC01-1-19                                      | 145   | 145.8 | 81.9  | 1.78 | 201.6    | 0.0809 | 0.0022 | 2.2832  | 0.0737 | 0.2045 | 0.0033 | 0.4937 | 1220 | 53.70 | 1207 | 22.81 | 1200 | 17.46 | 1.7   |
| 17DC01-1-35                                      | 214   | 151.6 | 144.0 | 1.05 | 107.4    | 0.0988 | 0.0018 | 3.7199  | 0.0772 | 0.2730 | 0.0035 | 0.6134 | 2000 | 33.33 | 1576 | 16.65 | 1556 | 17.62 | 28.5  |
| 17DC01-1-41                                      | 158   | 150.1 | 128.2 | 1.17 | 115.6    | 0.0777 | 0.0021 | 2.1667  | 0.0631 | 0.2020 | 0.0029 | 0.4934 | 1140 | 52.31 | 1170 | 20.24 | 1186 | 15.57 | -3.9  |
| 17DC01-1-55                                      | 110.3 | 98.4  | 107.1 | 0.92 | 0.0000   | 0.0786 | 0.0023 | 2.2470  | 0.0774 | 0.2073 | 0.0034 | 0.4771 | 1161 | 59.26 | 1196 | 24.23 | 1214 | 18.21 | -4.4  |
| 17DC01-1-60                                      | 126.1 | 117.4 | 110.1 | 1.07 | 18.2786  | 0.0737 | 0.0018 | 2.1275  | 0.0664 | 0.2095 | 0.0041 | 0.6275 | 1035 | 49.23 | 1158 | 21.56 | 1226 | 21.87 | -15.6 |
| 17DC01-1-62                                      | 323   | 330   | 157.9 | 2.09 | 634      | 0.0760 | 0.0018 | 2.1201  | 0.0578 | 0.2029 | 0.0030 | 0.5476 | 1095 | 43.52 | 1155 | 18.83 | 1191 | 16.25 | -8.0  |
| 17DC01-1-66                                      | 138   | 133.8 | 112.9 | 1.19 | 45.3     | 0.0760 | 0.0020 | 2.0172  | 0.0548 | 0.1937 | 0.0031 | 0.5986 | 1096 | 51.85 | 1121 | 18.45 | 1142 | 17.02 | -4.0  |
| 17DC01-1-70                                      | 82.0  | 54.7  | 51.1  | 1.07 | 0.0000   | 0.1030 | 0.0028 | 4.1063  | 0.1216 | 0.2898 | 0.0043 | 0.5040 | 1680 | 50.62 | 1656 | 24.20 | 1641 | 21.63 | 2.4   |
| 17DC01-1-83                                      | 376   | 289.5 | 141.8 | 2.04 | 270.9035 | 0.1089 | 0.0031 | 4.1616  | 0.0933 | 0.2776 | 0.0065 | 1.0472 | 1783 | 51.54 | 1666 | 18.39 | 1579 | 32.90 | 12.9  |
| 17DC01-1-92                                      | 70.9  | 52.6  | 77.5  | 0.68 | 0.0000   | 0.0874 | 0.0024 | 2.8394  | 0.0928 | 0.2354 | 0.0039 | 0.5074 | 1369 | 53.71 | 1366 | 24.57 | 1363 | 20.39 | 0.4   |
| Sample17DC02-1 (39°16'41.77"N , 122°36'22.46"E)  |       |       |       |      |          |        |        |         |        |        |        |        |      |       |      |       |      |       |       |
| Detrital zircons                                 |       |       |       |      |          |        |        |         |        |        |        |        |      |       |      |       |      |       |       |
| 17DC02-1-01                                      | 51.09 | 1.51  | 266   | 0.01 | 12.7     | 0.0797 | 0.0011 | 2.2015  | 0.0455 | 0.2003 | 0.0033 | 0.7983 | 1189 | 27.78 | 1182 | 14.45 | 1177 | 17.75 | 1.0   |
| 17DC02-1-02                                      | 113   | 101.6 | 117.2 | 0.87 | 0.0000   | 0.0798 | 0.0015 | 2.1419  | 0.0432 | 0.1950 | 0.0029 | 0.7254 | 1192 | 37.50 | 1162 | 13.99 | 1149 | 15.41 | 3.7   |
| 17DC02-1-03                                      | 500   | 410   | 621   | 0.66 | 0.0000   | 0.0789 | 0.0010 | 2.2212  | 0.0451 | 0.2041 | 0.0035 | 0.8408 | 1169 | 25.15 | 1188 | 14.24 | 1197 | 18.66 | -2.4  |
| 17DC02-1-04                                      | 160   | 102.0 | 125.0 | 0.82 | 3.81     | 0.0967 | 0.0016 | 3.6148  | 0.0589 | 0.2715 | 0.0034 | 0.7666 | 1561 | 30.09 | 1553 | 13.00 | 1549 | 17.22 | 0.8   |
| 17DC02-1-05                                      | 250   | 160   | 190   | 0.84 | 2.07     | 0.0976 | 0.0012 | 3.7289  | 0.0738 | 0.2769 | 0.0048 | 0.8762 | 1589 | 17.74 | 1578 | 15.89 | 1576 | 24.27 | 0.8   |
| 17DC02-1-06                                      | 197   | 149   | 145.8 | 1.02 | 7.05     | 0.0892 | 0.0014 | 2.9348  | 0.0625 | 0.2384 | 0.0038 | 0.7432 | 1409 | 23.92 | 1391 | 16.14 | 1378 | 19.64 | 2.2   |
| 17DC02-1-07                                      | 358   | 280   | 247   | 1.14 | 0.0000   | 0.0871 | 0.0012 | 2.9111  | 0.0560 | 0.2421 | 0.0036 | 0.7829 | 1363 | 25.93 | 1385 | 14.58 | 1398 | 18.96 | -2.5  |
| 17DC02-1-08                                      | 158   | 137.5 | 185   | 0.74 | 0.0000   | 0.0776 | 0.0012 | 2.1302  | 0.0425 | 0.1990 | 0.0031 | 0.7916 | 1136 | 30.40 | 1159 | 13.81 | 1170 | 16.91 | -2.9  |
| 17DC02-1-09                                      | 279   | 163   | 129.6 | 1.25 | 0.0000   | 0.1070 | 0.0016 | 4.9117  | 0.1326 | 0.3321 | 0.0072 | 0.8071 | 1750 | 27.63 | 1804 | 22.81 | 1848 | 35.03 | -5.3  |
| 17DC02-1-10                                      | 285   | 183   | 228   | 0.80 | 0.0000   | 0.0923 | 0.0014 | 3.5566  | 0.0754 | 0.2790 | 0.0047 | 0.7962 | 1476 | 23.30 | 1540 | 16.83 | 1586 | 23.74 | -7.0  |
| 17DC02-1-100                                     | 412   | 182   | 532   | 0.34 | 2.09     | 0.1070 | 0.0012 | 4.6142  | 0.0974 | 0.3122 | 0.0055 | 0.8348 | 1750 | 22.22 | 1752 | 17.66 | 1752 | 27.05 | -0.1  |
| 17DC02-1-11                                      | 279   | 163   | 374   | 0.43 | 12.8     | 0.0902 | 0.0012 | 3.2127  | 0.0663 | 0.2581 | 0.0043 | 0.8095 | 1429 | 26.24 | 1460 | 16.02 | 1480 | 22.12 | -3.5  |
| 17DC02-1-12                                      | 250   | 174   | 187   | 0.93 | 0.0000   | 0.0929 | 0.0013 | 3.3477  | 0.0672 | 0.2610 | 0.0041 | 0.7915 | 1487 | 27.16 | 1492 | 15.73 | 1495 | 21.22 | -0.5  |
| 17DC02-1-14                                      | 487   | 273   | 251   | 1.09 | 0.0000   | 0.1114 | 0.0013 | 5.1921  | 0.0890 | 0.3374 | 0.0045 | 0.7852 | 1833 | 20.68 | 1851 | 14.65 | 1874 | 21.91 | -2.2  |
| 17DC02-1-15                                      | 137   | 105.2 | 119.5 | 0.88 | 9.29     | 0.0859 | 0.0016 | 2.7367  | 0.0638 | 0.2307 | 0.0032 | 0.5977 | 1336 | 36.27 | 1338 | 17.36 | 1338 | 16.85 | -0.1  |
| 17DC02-1-16                                      | 222   | 115.8 | 182   | 0.64 | 11.94    | 0.1088 | 0.0014 | 4.8970  | 0.0807 | 0.3263 | 0.0044 | 0.8263 | 1780 | 18.36 | 1802 | 13.96 | 1820 | 21.63 | -2.2  |
| 17DC02-1-17                                      | 183   | 112.3 | 91.6  | 1.23 | 30.7     | 0.1053 | 0.0017 | 4.5863  | 0.0974 | 0.3157 | 0.0046 | 0.6912 | 1720 | 25.00 | 1747 | 17.74 | 1769 | 22.72 | -2.7  |
| 17DC02-1-18                                      | 203   | 130.0 | 105.9 | 1.23 | 1.28     | 0.1026 | 0.0016 | 4.1925  | 0.0892 | 0.2963 | 0.0049 | 0.7797 | 1672 | 29.47 | 1673 | 17.47 | 1673 | 24.45 | -0.1  |
| 17DC02-1-19                                      | 74.8  | 68.7  | 71.5  | 0.96 | 11.1     | 0.0783 | 0.0016 | 2.0889  | 0.0478 | 0.1934 | 0.0027 | 0.6018 | 1155 | 38.89 | 1145 | 15.73 | 1140 | 14.40 | 1.3   |
| 17DC02-1-20                                      | 212   | 135.3 | 169   | 0.80 | 0.0000   | 0.0970 | 0.0014 | 3.7172  | 0.0780 | 0.2773 | 0.0040 | 0.6856 | 1569 | 26.08 | 1575 | 16.82 | 1578 | 20.14 | -0.6  |
| 17DC02-1-21                                      | 106.3 | 67.4  | 103.8 | 0.65 | 0.0000   | 0.0929 | 0.0016 | 3.3269  | 0.0744 | 0.2597 | 0.0040 | 0.6852 | 1487 | 32.25 | 1487 | 17.48 | 1488 | 20.37 | -0.1  |
| 17DC02-1-22                                      | 87.6  | 59.4  | 122.6 | 0.48 | 8.54     | 0.0855 | 0.0017 | 2.7399  | 0.0711 | 0.2325 | 0.0038 | 0.6338 | 1328 | 38.89 | 1339 | 19.33 | 1348 | 20.02 | -1.5  |

|             |      |       |       |      |        |        |        |         |        |        |        |        |      |       |      |       |      |       |      |
|-------------|------|-------|-------|------|--------|--------|--------|---------|--------|--------|--------|--------|------|-------|------|-------|------|-------|------|
| 17DC02-1-23 | 176  | 113.9 | 186   | 0.61 | 0.0000 | 0.0918 | 0.0013 | 3.2467  | 0.0663 | 0.2564 | 0.0040 | 0.7724 | 1463 | 32.25 | 1468 | 15.89 | 1471 | 20.77 | -0.6 |
| 17DC02-1-24 | 215  | 133.0 | 142.1 | 0.94 | 0.0000 | 0.1004 | 0.0015 | 4.0753  | 0.0811 | 0.2940 | 0.0041 | 0.6937 | 1631 | 26.39 | 1649 | 16.26 | 1661 | 20.24 | -1.8 |
| 17DC02-1-25 | 94.7 | 85.0  | 76.8  | 1.11 | 0.0000 | 0.0790 | 0.0019 | 2.1504  | 0.0593 | 0.1975 | 0.0029 | 0.5335 | 1172 | 48.15 | 1165 | 19.11 | 1162 | 15.64 | 0.9  |
| 17DC02-1-26 | 380  | 170   | 105.8 | 1.61 | 13.0   | 0.1573 | 0.0020 | 9.6126  | 0.1948 | 0.4431 | 0.0081 | 0.8994 | 2428 | 21.29 | 2398 | 18.71 | 2364 | 36.11 | 2.7  |
| 17DC02-1-27 | 144  | 89.9  | 100.4 | 0.90 | 0.84   | 0.1001 | 0.0016 | 3.8969  | 0.0730 | 0.2821 | 0.0035 | 0.6546 | 1628 | 29.63 | 1613 | 15.18 | 1602 | 17.41 | 1.6  |
| 17DC02-1-28 | 271  | 120.8 | 338   | 0.36 | 10.84  | 0.1059 | 0.0011 | 4.5918  | 0.0838 | 0.3139 | 0.0049 | 0.8513 | 1731 | 13.89 | 1748 | 15.27 | 1760 | 23.95 | -1.6 |
| 17DC02-1-29 | 97   | 54.7  | 38.5  | 1.42 | 0.0000 | 0.1199 | 0.0026 | 5.6684  | 0.1318 | 0.3431 | 0.0049 | 0.6098 | 1955 | 38.89 | 1927 | 20.11 | 1901 | 23.36 | 2.8  |
| 17DC02-1-30 | 93.6 | 63.4  | 70.1  | 0.91 | 2.69   | 0.0946 | 0.0017 | 3.5343  | 0.0860 | 0.2704 | 0.0046 | 0.6945 | 1521 | 33.18 | 1535 | 19.29 | 1543 | 23.21 | -1.4 |
| 17DC02-1-31 | 274  | 210   | 403   | 0.52 | 0.0000 | 0.0798 | 0.0009 | 2.2256  | 0.0457 | 0.2019 | 0.0037 | 0.8985 | 1194 | 23.30 | 1189 | 14.40 | 1186 | 19.98 | 0.7  |
| 17DC02-1-32 | 296  | 266   | 246   | 1.08 | 0.0000 | 0.0799 | 0.0012 | 2.2374  | 0.0439 | 0.2030 | 0.0032 | 0.7920 | 1195 | 30.40 | 1193 | 13.79 | 1191 | 16.91 | 0.4  |
| 17DC02-1-33 | 208  | 128.0 | 192   | 0.67 | 0.0000 | 0.0953 | 0.0013 | 3.6248  | 0.0705 | 0.2752 | 0.0042 | 0.7760 | 1544 | 25.77 | 1555 | 15.51 | 1567 | 21.01 | -1.4 |
| 17DC02-1-34 | 138  | 64.3  | 127.6 | 0.50 | 8.93   | 0.1135 | 0.0014 | 5.2334  | 0.0946 | 0.3341 | 0.0050 | 0.8220 | 1857 | 23.30 | 1858 | 15.46 | 1858 | 24.00 | 0.0  |
| 17DC02-1-35 | 142  | 67.0  | 100.2 | 0.67 | 0.0000 | 0.1205 | 0.0014 | 6.0020  | 0.1040 | 0.3607 | 0.0053 | 0.8480 | 1965 | 20.99 | 1976 | 15.15 | 1986 | 25.14 | -1.0 |
| 17DC02-1-36 | 168  | 130.6 | 112.6 | 1.16 | 1.58   | 0.0889 | 0.0015 | 2.9845  | 0.0625 | 0.2431 | 0.0034 | 0.6628 | 1403 | 31.48 | 1404 | 15.97 | 1403 | 17.52 | 0.0  |
| 17DC02-1-37 | 65.9 | 38.0  | 100.9 | 0.38 | 5.41   | 0.0911 | 0.0016 | 3.1350  | 0.0685 | 0.2497 | 0.0041 | 0.7566 | 1450 | 33.34 | 1441 | 16.85 | 1437 | 21.31 | 0.9  |
| 17DC02-1-38 | 149  | 98.9  | 132.3 | 0.75 | 27.0   | 0.0940 | 0.0014 | 3.4887  | 0.0728 | 0.2692 | 0.0048 | 0.8612 | 1509 | 28.40 | 1525 | 16.49 | 1537 | 24.57 | -1.8 |
| 17DC02-1-39 | 136  | 101.1 | 126.8 | 0.80 | 9.38   | 0.0878 | 0.0015 | 2.8703  | 0.0598 | 0.2369 | 0.0035 | 0.7096 | 1389 | 31.95 | 1374 | 15.70 | 1370 | 18.25 | 1.4  |
| 17DC02-1-40 | 171  | 140.1 | 202   | 0.69 | 2.40   | 0.0806 | 0.0011 | 2.3132  | 0.0471 | 0.2078 | 0.0032 | 0.7554 | 1213 | 27.78 | 1216 | 14.47 | 1217 | 17.08 | -0.3 |
| 17DC02-1-41 | 215  | 118.3 | 314   | 0.38 | 27.2   | 0.0922 | 0.0012 | 3.2524  | 0.0625 | 0.2552 | 0.0035 | 0.7179 | 1472 | 24.07 | 1470 | 14.96 | 1465 | 18.10 | 0.5  |
| 17DC02-1-42 | 311  | 187   | 146.4 | 1.28 | 0.0000 | 0.1104 | 0.0013 | 4.9535  | 0.0907 | 0.3248 | 0.0049 | 0.8220 | 1806 | 20.52 | 1811 | 15.52 | 1813 | 23.81 | -0.4 |
| 17DC02-1-43 | 241  | 116.8 | 269   | 0.43 | 9.26   | 0.1060 | 0.0012 | 4.6250  | 0.0696 | 0.3164 | 0.0041 | 0.8648 | 1732 | 21.76 | 1754 | 12.62 | 1772 | 20.18 | -2.3 |
| 17DC02-1-44 | 144  | 115.2 | 137.2 | 0.84 | 20.1   | 0.0819 | 0.0016 | 2.4224  | 0.0522 | 0.2147 | 0.0030 | 0.6392 | 1243 | 37.81 | 1249 | 15.52 | 1254 | 15.72 | -0.9 |
| 17DC02-1-45 | 165  | 96.4  | 173   | 0.56 | 0.0000 | 0.0948 | 0.0013 | 3.6020  | 0.0674 | 0.2758 | 0.0048 | 0.9257 | 1524 | 25.77 | 1550 | 14.92 | 1570 | 24.17 | -2.9 |
| 17DC02-1-46 | 654  | 669   | 352   | 1.90 | 0.0000 | 0.0755 | 0.0011 | 1.9673  | 0.0334 | 0.1890 | 0.0024 | 0.7374 | 1083 | 28.55 | 1104 | 11.44 | 1116 | 12.83 | -2.9 |
| 17DC02-1-47 | 244  | 188   | 126.3 | 1.49 | 0.0000 | 0.0907 | 0.0014 | 3.2509  | 0.0721 | 0.2593 | 0.0039 | 0.6709 | 1443 | 29.63 | 1469 | 17.26 | 1486 | 19.78 | -2.9 |
| 17DC02-1-48 | 188  | 111.3 | 297   | 0.37 | 0.0000 | 0.0872 | 0.0013 | 2.8964  | 0.0525 | 0.2409 | 0.0035 | 0.7930 | 1366 | 27.78 | 1381 | 13.71 | 1391 | 18.00 | -1.8 |
| 17DC02-1-49 | 182  | 116.0 | 125.3 | 0.93 | 1.8048 | 0.1014 | 0.0017 | 4.1106  | 0.0955 | 0.2934 | 0.0044 | 0.6460 | 1650 | 30.09 | 1656 | 19.00 | 1658 | 21.95 | -0.5 |
| 17DC02-1-50 | 126  | 70.8  | 85.2  | 0.83 | 0.0000 | 0.1073 | 0.0018 | 4.7485  | 0.1004 | 0.3209 | 0.0049 | 0.7219 | 1755 | 30.41 | 1776 | 17.77 | 1794 | 23.92 | -2.2 |
| 17DC02-1-51 | 325  | 183   | 234   | 0.78 | 3.71   | 0.1017 | 0.0014 | 4.4791  | 0.0837 | 0.3193 | 0.0048 | 0.7981 | 1655 | 25.16 | 1727 | 15.56 | 1786 | 23.30 | -7.4 |
| 17DC02-1-52 | 222  | 140.9 | 149.2 | 0.94 | 0.0000 | 0.0978 | 0.0014 | 3.9682  | 0.0757 | 0.2938 | 0.0042 | 0.7458 | 1583 | 21.30 | 1628 | 15.51 | 1661 | 20.85 | -4.7 |
| 17DC02-1-53 | 235  | 214   | 195   | 1.10 | 0.0000 | 0.0789 | 0.0014 | 2.3206  | 0.0576 | 0.2137 | 0.0045 | 0.8531 | 1169 | 29.16 | 1219 | 17.62 | 1249 | 24.03 | -6.4 |
| 17DC02-1-54 | 263  | 148.0 | 117.7 | 1.26 | 0.0000 | 0.1133 | 0.0018 | 5.4913  | 0.1086 | 0.3515 | 0.0054 | 0.7707 | 1854 | 23.61 | 1899 | 17.04 | 1942 | 25.58 | -4.5 |
| 17DC02-1-55 | 400  | 277   | 318   | 0.87 | 8.52   | 0.0929 | 0.0011 | 3.3698  | 0.0545 | 0.2630 | 0.0040 | 0.9370 | 1487 | 22.22 | 1497 | 12.70 | 1505 | 20.34 | -1.2 |
| 17DC02-1-56 | 350  | 272   | 410   | 0.66 | 15.0   | 0.0810 | 0.0010 | 2.4390  | 0.0448 | 0.2180 | 0.0033 | 0.8327 | 1221 | 22.99 | 1254 | 13.25 | 1271 | 17.65 | -3.9 |
| 17DC02-1-57 | 1058 | 384   | 227   | 1.69 | 0.0000 | 0.1982 | 0.0020 | 15.8746 | 0.2789 | 0.5795 | 0.0088 | 0.8671 | 2813 | 16.05 | 2869 | 16.90 | 2947 | 36.07 | -4.5 |
| 17DC02-1-58 | 163  | 96.8  | 117.9 | 0.82 | 20.0   | 0.1037 | 0.0015 | 4.3933  | 0.0781 | 0.3070 | 0.0045 | 0.8221 | 1692 | 27.78 | 1711 | 14.75 | 1726 | 22.15 | -2.0 |
| 17DC02-1-59 | 174  | 74.8  | 231   | 0.32 | 9.79   | 0.1042 | 0.0015 | 4.5450  | 0.0859 | 0.3161 | 0.0052 | 0.8650 | 1700 | 25.93 | 1739 | 15.78 | 1770 | 25.34 | -4.0 |
| 17DC02-1-60 | 99.2 | 73.4  | 111.6 | 0.66 | 0.0000 | 0.0849 | 0.0016 | 2.6757  | 0.0566 | 0.2285 | 0.0034 | 0.7095 | 1313 | 36.57 | 1322 | 15.66 | 1327 | 18.01 | -1.0 |
| 17DC02-1-61 | 294  | 177   | 234   | 0.76 | 11.35  | 0.0997 | 0.0014 | 4.0589  | 0.0867 | 0.2946 | 0.0054 | 0.8655 | 1620 | 24.84 | 1646 | 17.43 | 1664 | 27.13 | -2.6 |
| 17DC02-1-62 | 206  | 84.8  | 185   | 0.46 | 0.0000 | 0.1243 | 0.0015 | 6.3695  | 0.1220 | 0.3709 | 0.0063 | 0.8842 | 2020 | 21.14 | 2028 | 16.86 | 2034 | 29.55 | -0.7 |
| 17DC02-1-63 | 989  | 707   | 506   | 1.40 | 13.91  | 0.0947 | 0.0011 | 3.5944  | 0.0671 | 0.2746 | 0.0041 | 0.8083 | 1521 | 22.53 | 1548 | 14.87 | 1564 | 20.97 | -2.7 |
| 17DC02-1-64 | 167  | 84.3  | 137.0 | 0.61 | 4.83   | 0.1167 | 0.0015 | 5.3797  | 0.1017 | 0.3337 | 0.0054 | 0.8631 | 1906 | 22.22 | 1882 | 16.24 | 1856 | 26.34 | 2.7  |

|                                                  |       |       |       |      |        |        |        |         |        |        |        |        |      |       |      |       |      |       |      |
|--------------------------------------------------|-------|-------|-------|------|--------|--------|--------|---------|--------|--------|--------|--------|------|-------|------|-------|------|-------|------|
| 17DC02-1-65                                      | 299   | 95.5  | 282   | 0.34 | 0.0000 | 0.1421 | 0.0015 | 7.9101  | 0.1779 | 0.4025 | 0.0083 | 0.9116 | 2254 | 18.67 | 2221 | 20.33 | 2180 | 37.95 | 3.4  |
| 17DC02-1-66                                      | 790   | 621   | 276   | 2.25 | 0.0000 | 0.0935 | 0.0012 | 3.5057  | 0.0762 | 0.2714 | 0.0049 | 0.8249 | 1498 | 24.84 | 1529 | 17.20 | 1548 | 24.68 | -3.2 |
| 17DC02-1-67                                      | 139   | 61.6  | 107.9 | 0.57 | 0.0000 | 0.1253 | 0.0016 | 6.3602  | 0.1237 | 0.3674 | 0.0059 | 0.8267 | 2032 | 22.22 | 2027 | 17.11 | 2017 | 27.86 | 0.8  |
| 17DC02-1-68                                      | 188   | 179   | 151.1 | 1.18 | 18.0   | 0.0781 | 0.0015 | 2.1351  | 0.0565 | 0.1975 | 0.0035 | 0.6611 | 1150 | 32.41 | 1160 | 18.32 | 1162 | 18.62 | -1.0 |
| 17DC02-1-69                                      | 167   | 111.5 | 91.4  | 1.22 | 0.0000 | 0.1017 | 0.0015 | 4.0778  | 0.0897 | 0.2905 | 0.0057 | 0.8942 | 1657 | 27.32 | 1650 | 17.98 | 1644 | 28.57 | 0.8  |
| 17DC02-1-70                                      | 123.5 | 59.2  | 138.0 | 0.43 | 0.0000 | 0.1063 | 0.0015 | 4.6369  | 0.0985 | 0.3156 | 0.0054 | 0.8031 | 1739 | 27.31 | 1756 | 17.79 | 1768 | 26.40 | -1.7 |
| 17DC02-1-71                                      | 202   | 76.5  | 100.5 | 0.76 | 0.00   | 0.1611 | 0.0022 | 10.4237 | 0.1987 | 0.4691 | 0.0082 | 0.9227 | 2478 | 23.15 | 2473 | 17.74 | 2480 | 36.22 | -0.1 |
| 17DC02-1-72                                      | 627   | 378   | 566   | 0.67 | 7.34   | 0.0964 | 0.0011 | 3.8051  | 0.0758 | 0.2859 | 0.0053 | 0.9295 | 1555 | 15.74 | 1594 | 16.05 | 1621 | 26.54 | -4.1 |
| 17DC02-1-73                                      | 271   | 227   | 305   | 0.74 | 7.86   | 0.0795 | 0.0011 | 2.2868  | 0.0445 | 0.2080 | 0.0031 | 0.7588 | 1187 | 27.31 | 1208 | 13.78 | 1218 | 16.41 | -2.5 |
| 17DC02-1-74                                      | 97.4  | 70.0  | 86.2  | 0.81 | 21.2   | 0.0882 | 0.0015 | 3.0214  | 0.0667 | 0.2483 | 0.0042 | 0.7725 | 1387 | 33.34 | 1413 | 16.87 | 1430 | 21.88 | -3.0 |
| 17DC02-1-75                                      | 226   | 146.0 | 223   | 0.65 | 0.0000 | 0.0900 | 0.0012 | 3.1845  | 0.0588 | 0.2563 | 0.0039 | 0.8251 | 1426 | 25.93 | 1453 | 14.31 | 1471 | 20.07 | -3.1 |
| 17DC02-1-76                                      | 91.4  | 65.5  | 58.4  | 1.12 | 0.0000 | 0.0956 | 0.0018 | 3.4917  | 0.0794 | 0.2648 | 0.0044 | 0.7328 | 1540 | 35.19 | 1525 | 17.98 | 1514 | 22.50 | 1.7  |
| 17DC02-1-77                                      | 202   | 132.4 | 105.7 | 1.25 | 21.7   | 0.1026 | 0.0015 | 4.1245  | 0.0803 | 0.2914 | 0.0049 | 0.8560 | 1672 | 27.17 | 1659 | 15.96 | 1649 | 24.27 | 1.4  |
| 17DC02-1-78                                      | 484   | 295   | 71.4  | 4.13 | 16.7   | 0.1258 | 0.0018 | 6.3151  | 0.1307 | 0.3636 | 0.0063 | 0.8338 | 2040 | 25.31 | 2021 | 18.19 | 1999 | 29.68 | 2.0  |
| 17DC02-1-79                                      | 112   | 76.6  | 68.8  | 1.11 | 3.45   | 0.0974 | 0.0021 | 3.7448  | 0.1001 | 0.2781 | 0.0044 | 0.5966 | 1576 | 34.72 | 1581 | 21.44 | 1582 | 22.38 | -0.4 |
| 17DC02-1-80                                      | 95.5  | 92.7  | 88.5  | 1.05 | 0.0000 | 0.0786 | 0.0019 | 2.0749  | 0.0645 | 0.1910 | 0.0039 | 0.6484 | 1163 | 43.98 | 1141 | 21.32 | 1127 | 20.85 | 3.2  |
| 17DC02-1-81                                      | 277   | 259   | 327   | 0.79 | 3.09   | 0.0748 | 0.0010 | 1.9043  | 0.0406 | 0.1845 | 0.0032 | 0.8177 | 1061 | 32.41 | 1083 | 14.20 | 1092 | 17.50 | -2.8 |
| 17DC02-1-82                                      | 231   | 106.6 | 101.5 | 1.05 | 0.0000 | 0.1344 | 0.0018 | 7.5666  | 0.1368 | 0.4078 | 0.0056 | 0.7652 | 2157 | 23.77 | 2181 | 16.28 | 2205 | 25.86 | -2.2 |
| 17DC02-1-83                                      | 180   | 116.5 | 120.5 | 0.97 | 14.1   | 0.0991 | 0.0015 | 3.8980  | 0.0813 | 0.2850 | 0.0044 | 0.7350 | 1607 | 23.15 | 1613 | 16.88 | 1616 | 21.92 | -0.6 |
| 17DC02-1-84                                      | 528   | 284   | 241   | 1.18 | 19.0   | 0.1206 | 0.0014 | 5.8977  | 0.1290 | 0.3542 | 0.0067 | 0.8643 | 1966 | 20.37 | 1961 | 19.04 | 1955 | 31.90 | 0.6  |
| 17DC02-1-85                                      | 297   | 272   | 273   | 0.99 | 7.77   | 0.0810 | 0.0011 | 2.2355  | 0.0457 | 0.2001 | 0.0033 | 0.8107 | 1233 | 27.78 | 1192 | 14.36 | 1176 | 17.81 | 4.9  |
| 17DC02-1-86                                      | 249   | 170   | 164   | 1.04 | 8.06   | 0.0984 | 0.0015 | 3.7064  | 0.0788 | 0.2735 | 0.0049 | 0.8364 | 1594 | 27.78 | 1573 | 17.02 | 1559 | 24.62 | 2.3  |
| 17DC02-1-87                                      | 534   | 234   | 125.1 | 1.87 | 3.45   | 0.1752 | 0.0021 | 11.3610 | 0.2327 | 0.4698 | 0.0071 | 0.7401 | 2609 | 20.37 | 2553 | 19.19 | 2483 | 31.26 | 5.1  |
| 17DC02-1-88                                      | 145   | 76.2  | 87.6  | 0.87 | 5.15   | 0.1101 | 0.0017 | 5.1802  | 0.1068 | 0.3413 | 0.0052 | 0.7341 | 1811 | 27.47 | 1849 | 17.59 | 1893 | 24.85 | -4.3 |
| 17DC02-1-89                                      | 148   | 94.3  | 300   | 0.31 | 10.65  | 0.0817 | 0.0012 | 2.3476  | 0.0486 | 0.2085 | 0.0031 | 0.7195 | 1239 | 28.24 | 1227 | 14.75 | 1221 | 16.56 | 1.5  |
| 17DC02-1-90                                      | 134   | 94.9  | 94.7  | 1.00 | 0.0000 | 0.0950 | 0.0016 | 3.7087  | 0.0989 | 0.2834 | 0.0059 | 0.7805 | 1528 | 33.18 | 1573 | 21.35 | 1609 | 29.64 | -5.0 |
| 17DC02-1-91                                      | 142   | 72.0  | 140.1 | 0.51 | 0.0000 | 0.1102 | 0.0016 | 4.7842  | 0.1076 | 0.3152 | 0.0054 | 0.7623 | 1802 | 26.39 | 1782 | 18.92 | 1766 | 26.50 | 2.0  |
| 17DC02-1-92                                      | 50.68 | 1.00  | 249   | 0.00 | 3.37   | 0.0805 | 0.0011 | 2.2635  | 0.0407 | 0.2044 | 0.0029 | 0.7833 | 1209 | 27.00 | 1201 | 12.70 | 1199 | 15.43 | 0.9  |
| 17DC02-1-93                                      | 75.74 | 2.94  | 369   | 0.01 | 0.0000 | 0.0794 | 0.0010 | 2.2203  | 0.0438 | 0.2029 | 0.0033 | 0.8213 | 1183 | 25.46 | 1187 | 13.85 | 1191 | 17.64 | -0.6 |
| 17DC02-1-94                                      | 63.0  | 37.3  | 62.7  | 0.59 | 0.0000 | 0.0998 | 0.0021 | 3.8443  | 0.0983 | 0.2797 | 0.0046 | 0.6369 | 1621 | 38.89 | 1602 | 20.63 | 1590 | 22.96 | 1.9  |
| 17DC02-1-95                                      | 616   | 411   | 384   | 1.07 | 0.0000 | 0.0998 | 0.0012 | 4.0322  | 0.0771 | 0.2933 | 0.0051 | 0.9037 | 1621 | 22.22 | 1641 | 15.60 | 1658 | 25.28 | -2.2 |
| 17DC02-1-96                                      | 126   | 77.0  | 72.5  | 1.06 | 0.0000 | 0.1126 | 0.0019 | 4.8013  | 0.1051 | 0.3092 | 0.0047 | 0.6875 | 1842 | 29.79 | 1785 | 18.44 | 1737 | 22.94 | 6.1  |
| 17DC02-1-97                                      | 624   | 370   | 477   | 0.78 | 0.0000 | 0.1088 | 0.0012 | 4.6467  | 0.1033 | 0.3099 | 0.0066 | 0.9510 | 1780 | 19.29 | 1758 | 18.61 | 1740 | 32.25 | 2.3  |
| 17DC02-1-99                                      | 317   | 226   | 176   | 1.28 | 0.0000 | 0.0992 | 0.0015 | 3.7365  | 0.0783 | 0.2731 | 0.0042 | 0.7416 | 1609 | 28.39 | 1579 | 16.81 | 1557 | 21.50 | 3.4  |
| Rejected analyses (discordant > 10%, error > 5%) |       |       |       |      |        |        |        |         |        |        |        |        |      |       |      |       |      |       |      |
| 17DC02-1-13                                      | 266   | 160   | 188   | 0.85 | 0.0000 | 0.0987 | 0.0013 | 4.1126  | 0.0785 | 0.3017 | 0.0044 | 0.7692 | 2000 | 24.53 | 1657 | 15.63 | 1700 | 21.96 | 17.7 |
| 17DC02-1-98                                      | 147   | 102.6 | 312   | 0.33 | 0.0000 | 0.0802 | 0.0011 | 2.1470  | 0.0411 | 0.1943 | 0.0029 | 0.7927 | 1267 | 28.55 | 1164 | 13.29 | 1145 | 15.93 | 10.6 |
| Sample17DC03-1 (39°17'09.92"N , 122°37'53.19"E)  |       |       |       |      |        |        |        |         |        |        |        |        |      |       |      |       |      |       |      |
| Detrital zircons                                 |       |       |       |      |        |        |        |         |        |        |        |        |      |       |      |       |      |       |      |
| 17DC03-1-01                                      | 153   | 24.7  | 251   | 0.10 | 26.9   | 0.1111 | 0.0020 | 5.1644  | 0.1133 | 0.3362 | 0.0049 | 0.6580 | 1818 | 32.56 | 1847 | 18.70 | 1868 | 23.42 | -2.7 |
| 17DC03-1-02                                      | 170   | 109.4 | 137.9 | 0.79 | 114.3  | 0.0965 | 0.0020 | 3.7481  | 0.0871 | 0.2811 | 0.0039 | 0.5997 | 1558 | 38.89 | 1582 | 18.66 | 1597 | 19.73 | -2.5 |

|             |       |       |       |      |        |        |        |        |        |        |        |        |      |       |      |       |      |       |      |
|-------------|-------|-------|-------|------|--------|--------|--------|--------|--------|--------|--------|--------|------|-------|------|-------|------|-------|------|
| 17DC03-1-04 | 426   | 288   | 289   | 1.00 | 12.39  | 0.0995 | 0.0014 | 4.0535 | 0.0817 | 0.2943 | 0.0043 | 0.7192 | 1617 | 27.01 | 1645 | 16.46 | 1663 | 21.27 | -2.8 |
| 17DC03-1-05 | 164   | 162.3 | 149.5 | 1.09 | 64.4   | 0.0777 | 0.0019 | 2.2420 | 0.0657 | 0.2088 | 0.0037 | 0.5987 | 1139 | 43.98 | 1194 | 20.59 | 1222 | 19.54 | -6.8 |
| 17DC03-1-06 | 377   | 279   | 157.7 | 1.77 | 0.0000 | 0.1066 | 0.0017 | 4.5815 | 0.1061 | 0.3108 | 0.0054 | 0.7558 | 1743 | 25.00 | 1746 | 19.35 | 1745 | 26.79 | -0.1 |
| 17DC03-1-07 | 331   | 213   | 237   | 0.90 | 150.7  | 0.1010 | 0.0015 | 4.2639 | 0.0919 | 0.3050 | 0.0049 | 0.7448 | 1644 | 27.78 | 1686 | 17.76 | 1716 | 24.20 | -4.2 |
| 17DC03-1-08 | 87.1  | 87.5  | 49.4  | 1.77 | 0.0000 | 0.0778 | 0.0028 | 2.2360 | 0.0801 | 0.2091 | 0.0040 | 0.5395 | 1143 | 39.81 | 1192 | 25.13 | 1224 | 21.54 | -6.6 |
| 17DC03-1-09 | 231   | 167.2 | 139.4 | 1.20 | 103.0  | 0.0969 | 0.0020 | 3.7949 | 0.0886 | 0.2837 | 0.0042 | 0.6295 | 1565 | 39.50 | 1592 | 18.79 | 1610 | 20.95 | -2.8 |
| 17DC03-1-10 | 254   | 263   | 169.8 | 1.55 | 0.0000 | 0.0765 | 0.0015 | 2.1383 | 0.0525 | 0.2018 | 0.0027 | 0.5493 | 1107 | 6.48  | 1161 | 17.00 | 1185 | 14.60 | -6.6 |
| 17DC03-1-11 | 102.0 | 62.6  | 96.2  | 0.65 | 0.0000 | 0.0947 | 0.0021 | 3.6892 | 0.0915 | 0.2823 | 0.0044 | 0.6274 | 1521 | 41.20 | 1569 | 19.83 | 1603 | 22.09 | -5.1 |
| 17DC03-1-12 | 108.2 | 68.4  | 87.1  | 0.79 | 0.0000 | 0.0968 | 0.0022 | 3.8882 | 0.1069 | 0.2913 | 0.0054 | 0.6683 | 1563 | 43.67 | 1611 | 22.23 | 1648 | 26.72 | -5.2 |
| 17DC03-1-13 | 175   | 121.9 | 116.7 | 1.04 | 0.0000 | 0.0940 | 0.0019 | 3.6845 | 0.0839 | 0.2837 | 0.0039 | 0.5986 | 1509 | 38.12 | 1568 | 18.22 | 1610 | 19.45 | -6.3 |
| 17DC03-1-14 | 141   | 94.6  | 79.7  | 1.19 | 46.6   | 0.1009 | 0.0026 | 4.1257 | 0.1147 | 0.2957 | 0.0038 | 0.4679 | 1643 | 46.76 | 1659 | 22.75 | 1670 | 19.16 | -1.6 |
| 17DC03-1-15 | 261   | 258   | 215   | 1.20 | 172.9  | 0.0770 | 0.0013 | 2.1397 | 0.0476 | 0.2010 | 0.0030 | 0.6600 | 1122 | 34.11 | 1162 | 15.42 | 1181 | 15.86 | -5.0 |
| 17DC03-1-16 | 397   | 206   | 345   | 0.60 | 0.0000 | 0.1076 | 0.0013 | 5.0336 | 0.0834 | 0.3391 | 0.0050 | 0.8929 | 1761 | 23.31 | 1825 | 14.09 | 1882 | 24.17 | -6.4 |
| 17DC03-1-17 | 218   | 213   | 149.4 | 1.43 | 0.00   | 0.0786 | 0.0018 | 2.2732 | 0.0586 | 0.2094 | 0.0028 | 0.5175 | 1163 | 44.44 | 1204 | 18.19 | 1226 | 14.90 | -5.1 |
| 17DC03-1-18 | 197   | 158.4 | 92.7  | 1.71 | 0.0000 | 0.0905 | 0.0021 | 3.2870 | 0.0868 | 0.2633 | 0.0039 | 0.5605 | 1436 | 44.60 | 1478 | 20.58 | 1507 | 19.90 | -4.7 |
| 17DC03-1-19 | 241   | 174.4 | 169.0 | 1.03 | 47.3   | 0.0934 | 0.0022 | 3.5378 | 0.0894 | 0.2751 | 0.0038 | 0.5448 | 1495 | 44.60 | 1536 | 20.03 | 1567 | 19.16 | -4.5 |
| 17DC03-1-20 | 105.9 | 94.4  | 112.0 | 0.84 | 0.0000 | 0.0833 | 0.0023 | 2.4178 | 0.0781 | 0.2098 | 0.0033 | 0.4815 | 1277 | 48.00 | 1248 | 23.22 | 1228 | 17.40 | 4.1  |
| 17DC03-1-22 | 148   | 109.2 | 126.5 | 0.86 | 0.0000 | 0.0930 | 0.0021 | 3.3842 | 0.0975 | 0.2634 | 0.0043 | 0.5710 | 1487 | 36.27 | 1501 | 22.60 | 1507 | 22.12 | -1.4 |
| 17DC03-1-24 | 228   | 118.4 | 202   | 0.59 | 42.3   | 0.1088 | 0.0016 | 5.0196 | 0.1102 | 0.3342 | 0.0051 | 0.6909 | 1780 | 26.70 | 1823 | 18.63 | 1858 | 24.51 | -4.2 |
| 17DC03-1-25 | 748   | 600   | 452   | 1.33 | 0.0000 | 0.0928 | 0.0013 | 3.3254 | 0.0700 | 0.2596 | 0.0042 | 0.7622 | 1484 | 25.93 | 1487 | 16.47 | 1488 | 21.34 | -0.2 |
| 17DC03-1-26 | 456   | 292   | 362   | 0.81 | 0.0000 | 0.0977 | 0.0012 | 3.9253 | 0.0744 | 0.2915 | 0.0045 | 0.8122 | 1580 | 17.74 | 1619 | 15.38 | 1649 | 22.42 | -4.2 |
| 17DC03-1-27 | 268   | 164.9 | 173.4 | 0.95 | 0.0000 | 0.1027 | 0.0016 | 4.5025 | 0.0818 | 0.3185 | 0.0044 | 0.7529 | 1673 | 29.01 | 1731 | 15.14 | 1783 | 21.32 | -6.1 |
| 17DC03-1-28 | 266   | 269   | 165.0 | 1.63 | 112.3  | 0.0808 | 0.0016 | 2.2986 | 0.0525 | 0.2067 | 0.0032 | 0.6741 | 1218 | 34.26 | 1212 | 16.17 | 1211 | 17.01 | 0.5  |
| 17DC03-1-29 | 338   | 164.0 | 361   | 0.45 | 30.7   | 0.1095 | 0.0014 | 4.9737 | 0.0946 | 0.3295 | 0.0051 | 0.8214 | 1792 | 22.53 | 1815 | 16.13 | 1836 | 24.98 | -2.4 |
| 17DC03-1-30 | 886   | 436   | 856   | 0.51 | 60.3   | 0.1091 | 0.0012 | 5.0108 | 0.0880 | 0.3333 | 0.0049 | 0.8432 | 1784 | 20.37 | 1821 | 14.91 | 1854 | 23.87 | -3.8 |
| 17DC03-1-31 | 325   | 179.8 | 248   | 0.73 | 59.3   | 0.1072 | 0.0017 | 4.9908 | 0.1055 | 0.3385 | 0.0059 | 0.8184 | 1752 | 27.93 | 1818 | 17.92 | 1879 | 28.21 | -6.8 |
| 17DC03-1-33 | 239   | 236   | 179.3 | 1.32 | 0.0000 | 0.0770 | 0.0015 | 2.1216 | 0.0469 | 0.2007 | 0.0033 | 0.7436 | 1120 | 40.74 | 1156 | 15.29 | 1179 | 17.73 | -5.0 |
| 17DC03-1-34 | 323   | 239   | 133.9 | 1.79 | 88.4   | 0.0952 | 0.0018 | 3.7776 | 0.0862 | 0.2882 | 0.0041 | 0.6239 | 1531 | 37.04 | 1588 | 18.36 | 1632 | 20.55 | -6.2 |
| 17DC03-1-35 | 189   | 106.4 | 161.1 | 0.66 | 0.0000 | 0.1039 | 0.0017 | 4.6029 | 0.1005 | 0.3221 | 0.0055 | 0.7793 | 1695 | 30.40 | 1750 | 18.24 | 1800 | 26.73 | -5.8 |
| 17DC03-1-36 | 303   | 201   | 181.0 | 1.11 | 80.5   | 0.0988 | 0.0014 | 3.9372 | 0.0697 | 0.2893 | 0.0039 | 0.7606 | 1602 | 25.77 | 1621 | 14.38 | 1638 | 19.50 | -2.2 |
| 17DC03-1-37 | 187   | 142.7 | 125.3 | 1.14 | 40.8   | 0.0905 | 0.0018 | 3.2599 | 0.0782 | 0.2618 | 0.0043 | 0.6800 | 1436 | 37.50 | 1472 | 18.66 | 1499 | 21.83 | -4.2 |
| 17DC03-1-38 | 224   | 154.1 | 207   | 0.74 | 0.0000 | 0.0929 | 0.0015 | 3.3515 | 0.0757 | 0.2615 | 0.0042 | 0.7066 | 1487 | 29.63 | 1493 | 17.70 | 1497 | 21.35 | -0.7 |
| 17DC03-1-39 | 165   | 165.2 | 110.8 | 1.49 | 90.3   | 0.0794 | 0.0018 | 2.2738 | 0.0540 | 0.2081 | 0.0028 | 0.5763 | 1183 | 44.44 | 1204 | 16.77 | 1219 | 15.21 | -2.9 |
| 17DC03-1-41 | 272   | 175.4 | 197   | 0.89 | 0.0000 | 0.0976 | 0.0015 | 3.9888 | 0.0903 | 0.2973 | 0.0061 | 0.9131 | 1589 | 29.63 | 1632 | 18.40 | 1678 | 30.54 | -5.3 |
| 17DC03-1-42 | 127   | 87.9  | 91.6  | 0.96 | 0.0000 | 0.0967 | 0.0019 | 3.6754 | 0.0786 | 0.2768 | 0.0043 | 0.7204 | 1561 | 37.19 | 1566 | 17.10 | 1575 | 21.55 | -0.9 |
| 17DC03-1-43 | 144.7 | 66.5  | 207   | 0.32 | 0.0000 | 0.1031 | 0.0015 | 4.2805 | 0.0879 | 0.3021 | 0.0054 | 0.8688 | 1681 | 27.78 | 1690 | 16.95 | 1702 | 26.71 | -1.2 |
| 17DC03-1-44 | 179   | 176.8 | 138.2 | 1.28 | 0.0000 | 0.0777 | 0.0018 | 2.1410 | 0.0586 | 0.2002 | 0.0032 | 0.5765 | 1139 | 41.67 | 1162 | 18.95 | 1176 | 16.97 | -3.2 |
| 17DC03-1-45 | 384   | 303   | 202   | 1.50 | 0.0000 | 0.0983 | 0.0015 | 3.7913 | 0.0836 | 0.2796 | 0.0044 | 0.7129 | 1594 | 28.24 | 1591 | 17.75 | 1589 | 22.16 | 0.3  |
| 17DC03-1-47 | 358   | 268   | 206   | 1.30 | 0.0000 | 0.0928 | 0.0016 | 3.2944 | 0.0677 | 0.2578 | 0.0036 | 0.6820 | 1484 | 31.48 | 1480 | 16.05 | 1479 | 18.55 | 0.4  |
| 17DC03-1-48 | 315   | 149.3 | 295   | 0.51 | 110.5  | 0.1151 | 0.0015 | 5.4148 | 0.1011 | 0.3410 | 0.0043 | 0.6692 | 1883 | 24.07 | 1887 | 16.05 | 1892 | 20.50 | -0.4 |
| 17DC03-1-49 | 211   | 106.7 | 205   | 0.52 | 44.0   | 0.1072 | 0.0017 | 4.8263 | 0.1019 | 0.3270 | 0.0053 | 0.7690 | 1754 | 28.55 | 1789 | 17.80 | 1824 | 25.81 | -3.9 |
| 17DC03-1-50 | 190   | 127.4 | 150.4 | 0.85 | 108.9  | 0.0997 | 0.0019 | 3.8382 | 0.0874 | 0.2799 | 0.0044 | 0.6851 | 1618 | 35.18 | 1601 | 18.36 | 1591 | 22.00 | 1.7  |

|             |       |       |       |      |        |        |        |        |        |        |        |        |      |       |      |       |      |       |      |
|-------------|-------|-------|-------|------|--------|--------|--------|--------|--------|--------|--------|--------|------|-------|------|-------|------|-------|------|
| 17DC03-1-51 | 419   | 243   | 318   | 0.76 | 48.7   | 0.1048 | 0.0017 | 4.4985 | 0.1014 | 0.3118 | 0.0053 | 0.7509 | 1710 | 29.63 | 1731 | 18.77 | 1750 | 25.97 | -2.3 |
| 17DC03-1-52 | 344   | 195   | 272   | 0.71 | 0.0000 | 0.1073 | 0.0014 | 4.6781 | 0.0908 | 0.3166 | 0.0050 | 0.8059 | 1754 | 23.00 | 1763 | 16.28 | 1773 | 24.27 | -1.1 |
| 17DC03-1-53 | 222   | 151.4 | 113.8 | 1.33 | 0.0000 | 0.0996 | 0.0019 | 3.9764 | 0.0911 | 0.2901 | 0.0041 | 0.6206 | 1617 | 34.88 | 1629 | 18.63 | 1642 | 20.64 | -1.5 |
| 17DC03-1-54 | 347   | 234   | 236   | 0.99 | 0.0000 | 0.0962 | 0.0014 | 3.8492 | 0.0857 | 0.2903 | 0.0048 | 0.7504 | 1554 | 27.78 | 1603 | 17.97 | 1643 | 24.23 | -5.4 |
| 17DC03-1-55 | 332   | 240   | 199   | 1.20 | 0.0000 | 0.0976 | 0.0018 | 3.7195 | 0.0800 | 0.2772 | 0.0040 | 0.6662 | 1589 | 34.72 | 1576 | 17.25 | 1577 | 20.07 | 0.7  |
| 17DC03-1-56 | 335   | 156.7 | 406   | 0.39 | 0.0000 | 0.1078 | 0.0015 | 4.8609 | 0.1140 | 0.3276 | 0.0063 | 0.8188 | 1765 | 24.85 | 1796 | 19.78 | 1827 | 30.54 | -3.4 |
| 17DC03-1-57 | 297   | 222   | 152.1 | 1.46 | 64.9   | 0.0985 | 0.0017 | 3.7405 | 0.0767 | 0.2767 | 0.0046 | 0.8021 | 1598 | 31.94 | 1580 | 16.47 | 1575 | 23.01 | 1.5  |
| 17DC03-1-58 | 248   | 147.7 | 215   | 0.69 | 48.6   | 0.0988 | 0.0016 | 4.0662 | 0.0741 | 0.2997 | 0.0042 | 0.7771 | 1602 | 29.78 | 1648 | 14.90 | 1690 | 21.08 | -5.2 |
| 17DC03-1-59 | 234   | 125.6 | 198   | 0.63 | 0.0000 | 0.1072 | 0.0013 | 4.7654 | 0.0919 | 0.3229 | 0.0049 | 0.7913 | 1754 | 22.22 | 1779 | 16.22 | 1804 | 24.02 | -2.8 |
| 17DC03-1-60 | 428   | 250   | 280   | 0.89 | 0.0000 | 0.1060 | 0.0016 | 4.7769 | 0.1061 | 0.3274 | 0.0054 | 0.7480 | 1731 | 26.39 | 1781 | 18.69 | 1826 | 26.44 | -5.2 |
| 17DC03-1-61 | 614   | 457   | 378   | 1.21 | 8.62   | 0.0918 | 0.0013 | 3.4119 | 0.0792 | 0.2696 | 0.0046 | 0.7303 | 1463 | 25.93 | 1507 | 18.27 | 1539 | 23.23 | -5.0 |
| 17DC03-1-62 | 339   | 343   | 230   | 1.49 | 0.0000 | 0.0773 | 0.0014 | 2.1194 | 0.0440 | 0.1998 | 0.0032 | 0.7626 | 1129 | 35.19 | 1155 | 14.34 | 1174 | 17.00 | -3.8 |
| 17DC03-1-63 | 349   | 185   | 216   | 0.86 | 88.1   | 0.1129 | 0.0014 | 5.5775 | 0.1202 | 0.3585 | 0.0059 | 0.7649 | 1847 | 18.06 | 1913 | 18.61 | 1975 | 28.07 | -6.5 |
| 17DC03-1-64 | 151   | 123.4 | 169.6 | 0.73 | 113.7  | 0.0800 | 0.0016 | 2.3408 | 0.0611 | 0.2124 | 0.0035 | 0.6322 | 1198 | 34.25 | 1225 | 18.58 | 1242 | 18.64 | -3.5 |
| 17DC03-1-65 | 177   | 99.7  | 163.2 | 0.61 | 81.6   | 0.1023 | 0.0015 | 4.3017 | 0.0890 | 0.3055 | 0.0048 | 0.7572 | 1666 | 27.78 | 1694 | 17.08 | 1719 | 23.65 | -3.0 |
| 17DC03-1-66 | 105.7 | 96.5  | 97.0  | 1.00 | 0.0000 | 0.0785 | 0.0016 | 2.1798 | 0.0558 | 0.2018 | 0.0036 | 0.7055 | 1161 | 39.35 | 1175 | 17.82 | 1185 | 19.55 | -2.0 |
| 17DC03-1-67 | 384   | 255   | 291   | 0.87 | 0.0000 | 0.0966 | 0.0012 | 3.7752 | 0.0857 | 0.2836 | 0.0054 | 0.8380 | 1561 | 23.92 | 1587 | 18.25 | 1609 | 27.11 | -3.0 |
| 17DC03-1-68 | 197   | 126.6 | 103.3 | 1.23 | 0.0000 | 0.1020 | 0.0017 | 4.2003 | 0.0913 | 0.2989 | 0.0043 | 0.6691 | 1661 | 31.48 | 1674 | 17.87 | 1686 | 21.60 | -1.5 |
| 17DC03-1-69 | 268   | 165.0 | 186   | 0.88 | 0.0000 | 0.1057 | 0.0016 | 4.4520 | 0.0937 | 0.3060 | 0.0053 | 0.8171 | 1728 | 27.62 | 1722 | 17.50 | 1721 | 26.01 | 0.4  |
| 17DC03-1-70 | 880   | 737   | 405   | 1.82 | 0.0000 | 0.0850 | 0.0012 | 2.9464 | 0.0783 | 0.2513 | 0.0057 | 0.8558 | 1317 | 28.08 | 1394 | 20.18 | 1445 | 29.47 | -8.9 |
| 17DC03-1-71 | 155   | 93.5  | 160.6 | 0.58 | 35.3   | 0.0923 | 0.0017 | 3.4896 | 0.0723 | 0.2743 | 0.0034 | 0.6060 | 1476 | 34.72 | 1525 | 16.38 | 1562 | 17.44 | -5.5 |
| 17DC03-1-73 | 262   | 173.7 | 147.6 | 1.18 | 47.0   | 0.0982 | 0.0016 | 4.0011 | 0.0836 | 0.2955 | 0.0040 | 0.6429 | 1591 | 29.63 | 1634 | 17.01 | 1669 | 19.77 | -4.7 |
| 17DC03-1-74 | 274   | 188   | 213   | 0.88 | 0.0000 | 0.0892 | 0.0015 | 3.3507 | 0.0626 | 0.2734 | 0.0039 | 0.7708 | 1409 | 31.64 | 1493 | 14.64 | 1558 | 19.94 | -9.5 |
| 17DC03-1-75 | 111.8 | 72.1  | 102.7 | 0.70 | 48.7   | 0.0926 | 0.0018 | 3.4064 | 0.0759 | 0.2670 | 0.0036 | 0.6068 | 1480 | 36.57 | 1506 | 17.52 | 1526 | 18.39 | -3.0 |
| 17DC03-1-76 | 214   | 169.3 | 134.0 | 1.26 | 0.0000 | 0.0868 | 0.0014 | 3.0433 | 0.0648 | 0.2545 | 0.0038 | 0.6923 | 1367 | 32.25 | 1419 | 16.31 | 1461 | 19.30 | -6.5 |
| 17DC03-1-77 | 165   | 112.3 | 100.1 | 1.12 | 0.0000 | 0.0996 | 0.0020 | 3.9957 | 0.0879 | 0.2926 | 0.0051 | 0.7844 | 1617 | 32.41 | 1633 | 17.91 | 1654 | 25.21 | -2.3 |
| 17DC03-1-78 | 194   | 132.7 | 94.7  | 1.40 | 64.1   | 0.0981 | 0.0019 | 3.8933 | 0.0863 | 0.2885 | 0.0041 | 0.6400 | 1591 | 35.64 | 1612 | 17.94 | 1634 | 20.49 | -2.6 |
| 17DC03-1-79 | 201   | 80.8  | 258   | 0.31 | 124.0  | 0.1088 | 0.0017 | 5.1622 | 0.1024 | 0.3448 | 0.0049 | 0.7179 | 1789 | 29.63 | 1846 | 16.92 | 1910 | 23.56 | -6.3 |
| 17DC03-1-80 | 348   | 216   | 233   | 0.92 | 0.0000 | 0.1000 | 0.0014 | 4.2651 | 0.0849 | 0.3093 | 0.0042 | 0.6796 | 1625 | 26.39 | 1687 | 16.41 | 1737 | 20.62 | -6.5 |
| 17DC03-1-81 | 297   | 177.1 | 205   | 0.87 | 0.0000 | 0.1068 | 0.0015 | 4.8043 | 0.1211 | 0.3266 | 0.0068 | 0.8283 | 1746 | 24.85 | 1786 | 21.21 | 1822 | 33.14 | -4.2 |
| 17DC03-1-82 | 113.7 | 68.1  | 95.6  | 0.71 | 8.5477 | 0.1037 | 0.0019 | 4.3066 | 0.0943 | 0.3016 | 0.0042 | 0.6309 | 1691 | 33.18 | 1695 | 18.07 | 1699 | 20.65 | -0.5 |
| 17DC03-1-84 | 299   | 174.0 | 246   | 0.71 | 42.2   | 0.1079 | 0.0016 | 4.8234 | 0.1106 | 0.3251 | 0.0067 | 0.9037 | 1765 | 26.08 | 1789 | 19.32 | 1814 | 32.79 | -2.7 |
| 17DC03-1-85 | 237   | 99.7  | 232   | 0.43 | 0.0000 | 0.1211 | 0.0015 | 6.1900 | 0.1234 | 0.3712 | 0.0063 | 0.8572 | 1972 | 22.06 | 2003 | 17.48 | 2035 | 29.84 | -3.1 |
| 17DC03-1-86 | 363   | 309   | 153.3 | 2.02 | 20.83  | 0.0920 | 0.0020 | 3.2377 | 0.0837 | 0.2553 | 0.0034 | 0.5126 | 1533 | 42.44 | 1466 | 20.07 | 1466 | 17.39 | 4.6  |
| 17DC03-1-87 | 208   | 126.7 | 147.1 | 0.86 | 0.0000 | 0.1050 | 0.0018 | 4.4710 | 0.1040 | 0.3085 | 0.0044 | 0.6194 | 1715 | 31.48 | 1726 | 19.34 | 1733 | 21.93 | -1.1 |
| 17DC03-1-88 | 124   | 80.1  | 80.0  | 1.00 | 0.0000 | 0.0996 | 0.0018 | 4.2263 | 0.0907 | 0.3085 | 0.0047 | 0.7163 | 1617 | 33.33 | 1679 | 17.65 | 1733 | 23.38 | -6.7 |
| 17DC03-1-89 | 133   | 93.0  | 82.9  | 1.12 | 0.0000 | 0.0993 | 0.0020 | 3.8537 | 0.0843 | 0.2822 | 0.0039 | 0.6260 | 1611 | 38.89 | 1604 | 17.68 | 1602 | 19.46 | 0.5  |
| 17DC03-1-90 | 224   | 121.5 | 178.4 | 0.68 | 154.3  | 0.1081 | 0.0015 | 4.8119 | 0.0998 | 0.3232 | 0.0059 | 0.8812 | 1769 | 24.69 | 1787 | 17.48 | 1806 | 28.80 | -2.1 |
| 17DC03-1-91 | 115.9 | 76.4  | 94.2  | 0.81 | 37.4   | 0.0999 | 0.0024 | 3.8454 | 0.1086 | 0.2792 | 0.0045 | 0.5748 | 1633 | 38.42 | 1602 | 22.79 | 1587 | 22.86 | 2.9  |
| 17DC03-1-92 | 164   | 104.5 | 97.1  | 1.08 | 152.9  | 0.1059 | 0.0023 | 4.5928 | 0.1308 | 0.3133 | 0.0043 | 0.4771 | 1731 | 34.41 | 1748 | 23.77 | 1757 | 20.92 | -1.5 |
| 17DC03-1-93 | 336   | 216   | 349   | 0.62 | 0.0000 | 0.0997 | 0.0013 | 3.7762 | 0.0758 | 0.2747 | 0.0044 | 0.7911 | 1618 | 24.07 | 1588 | 16.15 | 1565 | 22.08 | 3.4  |
| 17DC03-1-94 | 284   | 203   | 284   | 0.71 | 107.0  | 0.0912 | 0.0014 | 3.2183 | 0.0615 | 0.2565 | 0.0044 | 0.8899 | 1451 | 23.15 | 1462 | 14.84 | 1472 | 22.40 | -1.4 |

|                                                  |      |       |       |      |        |        |        |         |        |        |        |        |      |       |      |       |      |       |       |
|--------------------------------------------------|------|-------|-------|------|--------|--------|--------|---------|--------|--------|--------|--------|------|-------|------|-------|------|-------|-------|
| 17DC03-1-95                                      | 237  | 115.4 | 247   | 0.47 | 28.1   | 0.1085 | 0.0013 | 4.8228  | 0.0877 | 0.3222 | 0.0048 | 0.8170 | 1776 | 21.15 | 1789 | 15.34 | 1800 | 23.36 | -1.4  |
| 17DC03-1-96                                      | 256  | 177.9 | 196   | 0.91 | 0.0000 | 0.0971 | 0.0014 | 3.6168  | 0.0655 | 0.2703 | 0.0036 | 0.7263 | 1569 | 27.78 | 1553 | 14.45 | 1542 | 18.07 | 1.7   |
| 17DC03-1-97                                      | 232  | 156.0 | 192   | 0.81 | 230    | 0.0985 | 0.0016 | 3.7056  | 0.0742 | 0.2735 | 0.0045 | 0.8129 | 1595 | 30.40 | 1573 | 16.04 | 1559 | 22.54 | 2.4   |
| 17DC03-1-98                                      | 144  | 113.9 | 100.0 | 1.14 | 0.0000 | 0.0927 | 0.0017 | 3.2260  | 0.0685 | 0.2527 | 0.0035 | 0.6475 | 1481 | 30.55 | 1463 | 16.50 | 1452 | 17.91 | 1.9   |
| 17DC03-1-99                                      | 235  | 130.4 | 192   | 0.68 | 0.0000 | 0.1069 | 0.0015 | 4.7953  | 0.0827 | 0.3254 | 0.0042 | 0.7487 | 1747 | 25.31 | 1784 | 14.54 | 1816 | 20.46 | -3.8  |
| 17DC03-1-100                                     | 162  | 130.9 | 81.4  | 1.61 | 21.8   | 0.0976 | 0.0023 | 3.6023  | 0.0922 | 0.2679 | 0.0038 | 0.5498 | 1589 | 44.44 | 1550 | 20.37 | 1530 | 19.18 | 3.8   |
| Rejected analyses (discordant > 10%, error > 5%) |      |       |       |      |        |        |        |         |        |        |        |        |      |       |      |       |      |       |       |
| 17DC03-1-03                                      | 73.2 | 57.8  | 73.2  | 0.79 | 0.0000 | 0.0897 | 0.0024 | 2.8602  | 0.0900 | 0.2300 | 0.0033 | 0.4602 | 1420 | 50.77 | 1371 | 23.68 | 1334 | 17.47 | 6.4   |
| 17DC03-1-21                                      | 346  | 181.0 | 371   | 0.49 | 0.0000 | 0.1007 | 0.0017 | 4.7910  | 0.1509 | 0.3447 | 0.0090 | 0.8250 | 1639 | 35.65 | 1783 | 26.49 | 1909 | 42.95 | -14.2 |
| 17DC03-1-23                                      | 98.6 | 105.8 | 81.4  | 1.30 | 0.0000 | 0.0743 | 0.0027 | 1.9613  | 0.0694 | 0.1924 | 0.0024 | 0.3547 | 1050 | 75.15 | 1102 | 23.80 | 1134 | 13.06 | -7.4  |
| 17DC03-1-32                                      | 151  | 141.2 | 142.6 | 0.99 | 48.6   | 0.0808 | 0.0020 | 2.3230  | 0.0642 | 0.2090 | 0.0030 | 0.5266 | 1217 | 49.53 | 1219 | 19.64 | 1223 | 16.24 | -0.6  |
| 17DC03-1-40                                      | 202  | 148.9 | 50.2  | 2.97 | 164.6  | 0.1003 | 0.0030 | 4.2486  | 0.1471 | 0.3073 | 0.0051 | 0.4746 | 1629 | 55.56 | 1683 | 28.48 | 1727 | 24.92 | -5.7  |
| 17DC03-1-46                                      | 75.6 | 60.6  | 44.9  | 1.35 | 0.0000 | 0.0878 | 0.0029 | 3.1204  | 0.1006 | 0.2600 | 0.0043 | 0.5126 | 1389 | 60.19 | 1438 | 24.80 | 1490 | 22.00 | -6.8  |
| 17DC03-1-72                                      | 325  | 195   | 226   | 0.86 | 0.0000 | 0.0965 | 0.0015 | 4.1589  | 0.0966 | 0.3123 | 0.0056 | 0.7767 | 1558 | 27.78 | 1666 | 19.05 | 1752 | 27.70 | -11.1 |
| 17DC03-1-83                                      | 166  | 97.8  | 72.7  | 1.35 | 38.8   | 0.1069 | 0.0033 | 4.8085  | 0.1398 | 0.3269 | 0.0047 | 0.4942 | 1747 | 51.69 | 1786 | 24.47 | 1823 | 22.85 | -4.2  |
| Sample FC57-1 (39°39'28"N , 122.9883°59'18"E)    |      |       |       |      |        |        |        |         |        |        |        |        |      |       |      |       |      |       |       |
| Detrital zircons                                 |      |       |       |      |        |        |        |         |        |        |        |        |      |       |      |       |      |       |       |
| FC57-1-01                                        | 133  | 104   | 91.4  | 1.14 | 7.3    | 0.0921 | 0.0015 | 2.9522  | 0.0653 | 0.2322 | 0.0035 | 0.6748 | 1469 | 30.40 | 1395 | 16.80 | 1346 | 18.14 | 9.2   |
| FC57-1-02                                        | 83   | 76.2  | 98.6  | 0.77 | 19.2   | 0.0788 | 0.0013 | 2.0593  | 0.0506 | 0.1893 | 0.0034 | 0.7321 | 1169 | 27.31 | 1135 | 16.82 | 1118 | 18.48 | 4.6   |
| FC57-1-03                                        | 135  | 144   | 92.6  | 1.56 | 21.0   | 0.0756 | 0.0014 | 1.8640  | 0.0415 | 0.1790 | 0.0028 | 0.7018 | 1085 | 33.18 | 1068 | 14.74 | 1061 | 15.31 | 2.2   |
| FC57-1-06                                        | 424  | 144   | 259   | 0.56 | 13.0   | 0.1776 | 0.0014 | 11.8003 | 0.2214 | 0.4808 | 0.0077 | 0.8552 | 2631 | 13.27 | 2589 | 17.65 | 2531 | 33.61 | 4.0   |
| FC57-1-07                                        | 125  | 121   | 101.2 | 1.19 | 19.2   | 0.0802 | 0.0012 | 2.2176  | 0.0468 | 0.2002 | 0.0030 | 0.7115 | 1203 | 28.86 | 1187 | 14.79 | 1176 | 16.16 | 2.3   |
| FC57-1-08                                        | 107  | 105   | 137   | 0.77 | 0.0000 | 0.0734 | 0.0011 | 1.8363  | 0.0385 | 0.1814 | 0.0030 | 0.7802 | 1028 | 31.48 | 1059 | 13.79 | 1075 | 16.19 | -4.4  |
| FC57-1-09                                        | 285  | 108   | 141   | 0.77 | 2.09   | 0.1761 | 0.0014 | 10.9118 | 0.1471 | 0.4492 | 0.0057 | 0.9491 | 2616 | 14.05 | 2516 | 12.66 | 2392 | 25.61 | 9.4   |
| FC57-1-11                                        | 146  | 137   | 150   | 0.91 | 16.4   | 0.0797 | 0.0011 | 2.1845  | 0.0438 | 0.1991 | 0.0034 | 0.8554 | 1191 | 27.78 | 1176 | 13.99 | 1170 | 18.36 | 1.8   |
| FC57-1-12                                        | 78   | 80.6  | 61.8  | 1.30 | 27.7   | 0.0781 | 0.0015 | 1.9557  | 0.0480 | 0.1815 | 0.0029 | 0.6540 | 1150 | 32.41 | 1100 | 16.51 | 1075 | 15.91 | 6.9   |
| FC57-1-13                                        | 107  | 69.2  | 57.0  | 1.21 | 0.0000 | 0.1075 | 0.0017 | 4.3231  | 0.1265 | 0.2925 | 0.0079 | 0.9284 | 1758 | 29.63 | 1698 | 24.16 | 1654 | 39.64 | 6.3   |
| FC57-1-14                                        | 75   | 64.8  | 54.3  | 1.19 | 0.0000 | 0.0856 | 0.0017 | 2.6250  | 0.0679 | 0.2225 | 0.0040 | 0.7036 | 1331 | 34.26 | 1308 | 19.04 | 1295 | 21.37 | 2.8   |
| FC57-1-15                                        | 182  | 102   | 283   | 0.36 | 18.5   | 0.0903 | 0.0008 | 3.0975  | 0.0544 | 0.2487 | 0.0036 | 0.8358 | 1431 | 17.75 | 1432 | 13.51 | 1432 | 18.85 | 0.0   |
| FC57-1-16                                        | 143  | 76.1  | 145   | 0.52 | 0.0000 | 0.1033 | 0.0012 | 4.3447  | 0.0758 | 0.3053 | 0.0043 | 0.7978 | 1684 | 21.76 | 1702 | 14.45 | 1718 | 21.01 | -2.0  |
| FC57-1-17                                        | 269  | 253   | 219   | 1.15 | 0.0000 | 0.0799 | 0.0010 | 2.3201  | 0.0585 | 0.2106 | 0.0045 | 0.8514 | 1195 | 24.07 | 1218 | 17.92 | 1232 | 24.10 | -3.0  |
| FC57-1-18                                        | 115  | 93.0  | 100   | 0.93 | 0.0000 | 0.0842 | 0.0013 | 2.5790  | 0.0595 | 0.2218 | 0.0035 | 0.6772 | 1298 | 25.00 | 1295 | 16.92 | 1291 | 18.31 | 0.5   |
| FC57-1-19                                        | 182  | 117   | 111   | 1.05 | 0.0000 | 0.1018 | 0.0012 | 4.1508  | 0.0850 | 0.2959 | 0.0046 | 0.7634 | 1657 | 22.23 | 1664 | 16.79 | 1671 | 23.02 | -0.8  |
| FC57-1-20                                        | 85   | 78.0  | 78.3  | 1.00 | 0.2001 | 0.0791 | 0.0013 | 2.1885  | 0.0528 | 0.2009 | 0.0036 | 0.7467 | 1176 | 33.33 | 1177 | 16.82 | 1180 | 19.43 | -0.4  |
| FC57-1-21                                        | 256  | 171   | 310   | 0.55 | 0.89   | 0.0904 | 0.0008 | 2.9395  | 0.0506 | 0.2360 | 0.0035 | 0.8564 | 1435 | 17.44 | 1392 | 13.07 | 1366 | 18.15 | 5.1   |
| FC57-1-24                                        | 79   | 40.7  | 49.2  | 0.83 | 13.2   | 0.1183 | 0.0019 | 5.6522  | 0.1021 | 0.3482 | 0.0056 | 0.8889 | 1931 | 28.55 | 1924 | 15.64 | 1926 | 26.76 | 0.3   |
| FC57-1-25                                        | 173  | 123   | 89.3  | 1.37 | 0.0000 | 0.0958 | 0.0012 | 3.6731  | 0.0746 | 0.2787 | 0.0054 | 0.9551 | 1544 | 23.00 | 1566 | 16.25 | 1585 | 27.27 | -2.6  |
| FC57-1-26                                        | 137  | 77.4  | 79.9  | 0.97 | 0.0000 | 0.1118 | 0.0015 | 5.1395  | 0.1185 | 0.3329 | 0.0060 | 0.7816 | 1829 | 24.08 | 1843 | 19.64 | 1852 | 29.03 | -1.2  |
| FC57-1-27                                        | 235  | 116   | 237   | 0.49 | 0.0000 | 0.1076 | 0.0009 | 4.6863  | 0.0962 | 0.3155 | 0.0058 | 0.9017 | 1759 | 16.21 | 1765 | 17.22 | 1768 | 28.63 | -0.5  |
| FC57-1-28                                        | 119  | 57.5  | 134   | 0.43 | 20.4   | 0.1070 | 0.0011 | 4.5547  | 0.0857 | 0.3087 | 0.0054 | 0.9336 | 1750 | 18.52 | 1741 | 15.72 | 1734 | 26.73 | 0.9   |
| FC57-1-29                                        | 251  | 178   | 122   | 1.45 | 38.1   | 0.0954 | 0.0010 | 3.6548  | 0.0700 | 0.2780 | 0.0049 | 0.9277 | 1544 | 20.38 | 1562 | 15.30 | 1582 | 24.92 | -2.3  |

|           |      |      |      |      |        |        |        |         |        |        |        |        |      |       |      |       |      |       |      |
|-----------|------|------|------|------|--------|--------|--------|---------|--------|--------|--------|--------|------|-------|------|-------|------|-------|------|
| FC57-1-30 | 257  | 158  | 110  | 1.44 | 0.0000 | 0.1157 | 0.0013 | 5.2476  | 0.1111 | 0.3285 | 0.0060 | 0.8634 | 1891 | 25.00 | 1860 | 18.09 | 1831 | 29.14 | 3.3  |
| FC57-1-31 | 145  | 75.3 | 144  | 0.52 | 0.0000 | 0.1026 | 0.0012 | 4.3224  | 0.0770 | 0.3058 | 0.0051 | 0.9444 | 1672 | 22.23 | 1698 | 14.73 | 1720 | 25.41 | -2.8 |
| FC57-1-32 | 133  | 100  | 97   | 1.03 | 11.5   | 0.0904 | 0.0013 | 3.0219  | 0.0543 | 0.2427 | 0.0037 | 0.8517 | 1433 | 27.32 | 1413 | 13.74 | 1401 | 19.28 | 2.3  |
| FC57-1-33 | 236  | 91.4 | 40.8 | 2.24 | 4.59   | 0.1815 | 0.0020 | 13.3778 | 0.2766 | 0.5330 | 0.0089 | 0.8058 | 2733 | 18.52 | 2707 | 19.62 | 2754 | 37.37 | -0.8 |
| FC57-1-34 | 70.7 | 44.2 | 113  | 0.39 | 0.0000 | 0.0848 | 0.0009 | 2.7073  | 0.0503 | 0.2316 | 0.0038 | 0.8914 | 1310 | 21.45 | 1330 | 13.82 | 1343 | 20.11 | -2.5 |
| FC57-1-35 | 455  | 270  | 225  | 1.20 | 17.9   | 0.1112 | 0.0010 | 5.0795  | 0.0962 | 0.3309 | 0.0058 | 0.9190 | 1820 | 16.98 | 1833 | 16.11 | 1843 | 27.90 | -1.2 |
| FC57-1-36 | 67.4 | 50.6 | 114  | 0.45 | 1.5    | 0.0792 | 0.0013 | 2.2245  | 0.0476 | 0.2040 | 0.0034 | 0.7875 | 1177 | 31.48 | 1189 | 15.03 | 1197 | 18.44 | -1.6 |
| FC57-1-37 | 135  | 69.7 | 126  | 0.55 | 0.0000 | 0.1082 | 0.0011 | 4.7492  | 0.0861 | 0.3178 | 0.0047 | 0.8105 | 1769 | 18.52 | 1776 | 15.25 | 1779 | 22.86 | -0.5 |
| FC57-1-38 | 110  | 79.7 | 54.6 | 1.46 | 5.90   | 0.0978 | 0.0014 | 3.7239  | 0.0738 | 0.2763 | 0.0043 | 0.7840 | 1583 | 27.78 | 1577 | 15.91 | 1573 | 21.71 | 0.7  |
| FC57-1-39 | 97   | 80.6 | 105  | 0.77 | 26.3   | 0.0823 | 0.0011 | 2.4615  | 0.0568 | 0.2168 | 0.0042 | 0.8316 | 1254 | 27.32 | 1261 | 16.69 | 1265 | 22.06 | -0.9 |
| FC57-1-40 | 855  | 672  | 213  | 3.16 | 0.0000 | 0.0917 | 0.0010 | 3.4280  | 0.0645 | 0.2711 | 0.0047 | 0.9155 | 1462 | 20.37 | 1511 | 14.82 | 1546 | 23.69 | -5.5 |
| FC57-1-41 | 309  | 252  | 141  | 1.78 | 0.0000 | 0.0915 | 0.0012 | 3.2217  | 0.0663 | 0.2552 | 0.0044 | 0.8379 | 1457 | 25.15 | 1462 | 15.98 | 1465 | 22.62 | -0.5 |
| FC57-1-42 | 321  | 184  | 213  | 0.86 | 0.0000 | 0.1092 | 0.0010 | 4.9493  | 0.0980 | 0.3287 | 0.0061 | 0.9320 | 1787 | 17.13 | 1811 | 16.77 | 1832 | 29.44 | -2.5 |
| FC57-1-43 | 148  | 105  | 233  | 0.45 | 12.4   | 0.0809 | 0.0009 | 2.3985  | 0.0414 | 0.2152 | 0.0033 | 0.8796 | 1220 | 23.30 | 1242 | 12.40 | 1256 | 17.34 | -2.9 |
| FC57-1-44 | 159  | 152  | 144  | 1.06 | 0.0000 | 0.0765 | 0.0011 | 2.0727  | 0.0413 | 0.1965 | 0.0031 | 0.7856 | 1109 | 29.63 | 1140 | 13.68 | 1157 | 16.59 | -4.1 |
| FC57-1-45 | 44.8 | 31.4 | 82.3 | 0.38 | 9.25   | 0.0794 | 0.0012 | 2.3073  | 0.0439 | 0.2108 | 0.0029 | 0.7189 | 1183 | 30.71 | 1215 | 13.51 | 1233 | 15.37 | -4.0 |
| FC57-1-46 | 329  | 187  | 201  | 0.93 | 15.4   | 0.1089 | 0.0010 | 4.7116  | 0.0908 | 0.3134 | 0.0053 | 0.8715 | 1781 | 16.67 | 1769 | 16.19 | 1757 | 25.86 | 1.4  |
| FC57-1-47 | 140  | 117  | 113  | 1.03 | 11.0   | 0.0836 | 0.0011 | 2.4476  | 0.0483 | 0.2124 | 0.0036 | 0.8543 | 1283 | 25.93 | 1257 | 14.26 | 1242 | 19.06 | 3.3  |
| FC57-1-48 | 246  | 160  | 225  | 0.71 | 0.0000 | 0.0923 | 0.0009 | 3.2947  | 0.0590 | 0.2590 | 0.0043 | 0.9356 | 1473 | 19.29 | 1480 | 13.99 | 1485 | 22.24 | -0.8 |
| FC57-1-49 | 225  | 95.3 | 55.8 | 1.71 | 0.97   | 0.1724 | 0.0023 | 10.9662 | 0.1921 | 0.4616 | 0.0069 | 0.8555 | 2581 | 22.22 | 2520 | 16.39 | 2446 | 30.54 | 5.5  |
| FC57-1-51 | 72   | 68.9 | 99   | 0.69 | 11.3   | 0.0732 | 0.0015 | 1.6877  | 0.0414 | 0.1669 | 0.0024 | 0.5865 | 1020 | 36.11 | 1004 | 15.64 | 995  | 13.27 | 2.6  |
| FC57-1-52 | 111  | 91.6 | 129  | 0.71 | 0.0000 | 0.0799 | 0.0011 | 2.2207  | 0.0424 | 0.2017 | 0.0033 | 0.8605 | 1195 | 32.41 | 1188 | 13.39 | 1184 | 17.78 | 0.9  |
| FC57-1-53 | 217  | 213  | 240  | 0.88 | 0.0000 | 0.0768 | 0.0009 | 1.9161  | 0.0353 | 0.1807 | 0.0028 | 0.8320 | 1117 | 22.23 | 1087 | 12.31 | 1071 | 15.13 | 4.3  |
| FC57-1-54 | 107  | 58.4 | 307  | 0.19 | 0.0000 | 0.0767 | 0.0008 | 2.0412  | 0.0439 | 0.1927 | 0.0034 | 0.8234 | 1114 | 26.39 | 1129 | 14.69 | 1136 | 18.46 | -1.9 |
| FC57-1-55 | 303  | 217  | 192  | 1.13 | 0.0000 | 0.0968 | 0.0010 | 3.4598  | 0.0687 | 0.2591 | 0.0047 | 0.9040 | 1565 | 19.60 | 1518 | 15.67 | 1485 | 23.82 | 5.4  |
| FC57-1-56 | 368  | 222  | 164  | 1.35 | 8.64   | 0.1114 | 0.0011 | 4.9167  | 0.0910 | 0.3208 | 0.0061 | 1.0215 | 1822 | 16.82 | 1805 | 15.67 | 1794 | 29.62 | 1.6  |
| FC57-1-57 | 586  | 249  | 122  | 2.04 | 0.0000 | 0.1840 | 0.0015 | 12.6854 | 0.2173 | 0.4998 | 0.0077 | 0.9016 | 2700 | 13.89 | 2657 | 16.22 | 2613 | 33.21 | 3.3  |
| FC57-1-58 | 108  | 72.5 | 115  | 0.63 | 17.0   | 0.0881 | 0.0011 | 2.9097  | 0.0515 | 0.2398 | 0.0034 | 0.7973 | 1384 | 25.16 | 1384 | 13.42 | 1386 | 17.63 | -0.2 |
| FC57-1-59 | 43.4 | 31.4 | 41.5 | 0.76 | 0.0000 | 0.0882 | 0.0018 | 2.8660  | 0.0756 | 0.2353 | 0.0038 | 0.6061 | 1387 | 38.89 | 1373 | 19.88 | 1362 | 19.65 | 1.8  |
| FC57-1-60 | 354  | 191  | 364  | 0.52 | 7.35   | 0.1033 | 0.0010 | 3.8396  | 0.0553 | 0.2695 | 0.0031 | 0.7950 | 1685 | 11.88 | 1601 | 11.66 | 1538 | 15.70 | 9.5  |
| FC57-1-61 | 126  | 104  | 132  | 0.79 | 0.0000 | 0.0808 | 0.0010 | 2.3595  | 0.0499 | 0.2117 | 0.0037 | 0.8201 | 1218 | 24.07 | 1230 | 15.09 | 1238 | 19.53 | -1.7 |
| FC57-1-62 | 64.7 | 42.2 | 76.8 | 0.55 | 33.4   | 0.0909 | 0.0014 | 3.0300  | 0.0652 | 0.2415 | 0.0032 | 0.6224 | 1456 | 30.71 | 1415 | 16.47 | 1395 | 16.83 | 4.4  |
| FC57-1-63 | 191  | 151  | 363  | 0.41 | 10.6   | 0.0755 | 0.0009 | 1.9580  | 0.0428 | 0.1881 | 0.0035 | 0.8515 | 1083 | 23.30 | 1101 | 14.71 | 1111 | 19.01 | -2.5 |
| FC57-1-64 | 141  | 113  | 225  | 0.50 | 0.0000 | 0.0781 | 0.0010 | 2.1122  | 0.0551 | 0.1957 | 0.0036 | 0.6987 | 1150 | 24.54 | 1153 | 18.00 | 1152 | 19.25 | -0.2 |
| FC57-1-65 | 183  | 80.3 | 211  | 0.38 | 13.1   | 0.1120 | 0.0011 | 4.9969  | 0.0871 | 0.3237 | 0.0048 | 0.8592 | 1833 | 16.52 | 1819 | 14.80 | 1808 | 23.63 | 1.4  |
| FC57-1-67 | 76   | 50.9 | 65.6 | 0.78 | 0.0000 | 0.0924 | 0.0013 | 3.3570  | 0.0617 | 0.2640 | 0.0037 | 0.7648 | 1476 | 27.16 | 1494 | 14.42 | 1510 | 18.95 | -2.3 |
| FC57-1-68 | 105  | 107  | 129  | 0.83 | 0.0000 | 0.0749 | 0.0015 | 1.7594  | 0.0439 | 0.1705 | 0.0026 | 0.6147 | 1065 | 35.03 | 1031 | 16.18 | 1015 | 14.42 | 4.9  |
| FC57-1-69 | 160  | 145  | 135  | 1.07 | 23.5   | 0.0831 | 0.0012 | 2.3285  | 0.0455 | 0.2035 | 0.0032 | 0.8009 | 1272 | 22.07 | 1221 | 13.91 | 1194 | 17.07 | 6.5  |
| FC57-1-70 | 65.0 | 45.7 | 56.2 | 0.81 | 0.0000 | 0.0952 | 0.0018 | 3.2713  | 0.0773 | 0.2498 | 0.0041 | 0.6866 | 1531 | 34.88 | 1474 | 18.41 | 1437 | 20.93 | 6.6  |
| FC57-1-71 | 181  | 124  | 233  | 0.53 | 7.91   | 0.0916 | 0.0010 | 3.0048  | 0.0507 | 0.2386 | 0.0039 | 0.9600 | 1458 | 20.37 | 1409 | 12.88 | 1379 | 20.11 | 5.7  |
| FC57-1-72 | 172  | 118  | 103  | 1.14 | 23.5   | 0.0975 | 0.0014 | 3.5953  | 0.0865 | 0.2668 | 0.0044 | 0.6784 | 1577 | 26.23 | 1548 | 19.13 | 1524 | 22.16 | 3.4  |
| FC57-1-73 | 109  | 52.2 | 93.6 | 0.56 | 0.0000 | 0.1149 | 0.0013 | 5.1831  | 0.0942 | 0.3276 | 0.0053 | 0.8919 | 1880 | 20.22 | 1850 | 15.52 | 1827 | 25.81 | 2.9  |



|                                                  |      |      |      |      |        |        |        |         |        |        |        |        |      |       |      |       |      |       |       |
|--------------------------------------------------|------|------|------|------|--------|--------|--------|---------|--------|--------|--------|--------|------|-------|------|-------|------|-------|-------|
| FC57-1-74                                        | 103  | 73.4 | 63.2 | 1.16 | 4.07   | 0.0939 | 0.0015 | 3.3132  | 0.0641 | 0.2562 | 0.0036 | 0.7351 | 1506 | 29.63 | 1484 | 15.13 | 1471 | 18.73 | 2.4   |
| FC57-1-75                                        | 31.3 | 24.1 | 42.9 | 0.56 | 0.0000 | 0.0820 | 0.0019 | 2.2506  | 0.0547 | 0.1995 | 0.0028 | 0.5760 | 1256 | 16.67 | 1197 | 17.11 | 1173 | 15.03 | 7.1   |
| FC57-1-77                                        | 97   | 67.9 | 98   | 0.69 | 0.0000 | 0.0915 | 0.0015 | 3.0509  | 0.0648 | 0.2422 | 0.0040 | 0.7861 | 1457 | 30.87 | 1420 | 16.28 | 1398 | 21.01 | 4.2   |
| FC57-1-78                                        | 311  | 135  | 114  | 1.18 | 46.5   | 0.1506 | 0.0014 | 9.1166  | 0.1766 | 0.4393 | 0.0083 | 0.9712 | 2354 | 16.05 | 2350 | 17.80 | 2348 | 37.04 | 0.3   |
| FC57-1-79                                        | 150  | 151  | 86.2 | 1.75 | 0.0000 | 0.0775 | 0.0012 | 2.0187  | 0.0472 | 0.1887 | 0.0032 | 0.7334 | 1144 | 31.02 | 1122 | 15.88 | 1114 | 17.54 | 2.7   |
| FC57-1-80                                        | 221  | 158  | 204  | 0.78 | 16.2   | 0.0885 | 0.0011 | 2.8250  | 0.0476 | 0.2316 | 0.0033 | 0.8446 | 1394 | 22.22 | 1362 | 12.68 | 1343 | 17.27 | 3.9   |
| FC57-1-81                                        | 177  | 125  | 73.1 | 1.71 | 0.0000 | 0.0968 | 0.0013 | 3.6723  | 0.0707 | 0.2753 | 0.0042 | 0.7960 | 1563 | 24.23 | 1565 | 15.40 | 1568 | 21.33 | -0.3  |
| FC57-1-82                                        | 171  | 90.4 | 192  | 0.47 | 0.0000 | 0.0980 | 0.0011 | 3.8647  | 0.0665 | 0.2864 | 0.0049 | 0.9883 | 1587 | 19.29 | 1606 | 13.93 | 1623 | 24.43 | -2.2  |
| FC57-1-83                                        | 108  | 67.1 | 125  | 0.54 | 0.0000 | 0.0929 | 0.0012 | 3.2571  | 0.0648 | 0.2543 | 0.0044 | 0.8620 | 1487 | 23.77 | 1471 | 15.48 | 1460 | 22.41 | 1.8   |
| FC57-1-84                                        | 392  | 374  | 212  | 1.77 | 0.0000 | 0.0829 | 0.0010 | 2.4022  | 0.0450 | 0.2101 | 0.0034 | 0.8590 | 1278 | 22.22 | 1243 | 13.46 | 1229 | 18.03 | 3.9   |
| FC57-1-85                                        | 58.2 | 40.7 | 50.3 | 0.81 | 3.96   | 0.0911 | 0.0017 | 3.1672  | 0.0845 | 0.2520 | 0.0046 | 0.6811 | 1450 | 35.65 | 1449 | 20.60 | 1449 | 23.58 | 0.1   |
| FC57-1-86                                        | 129  | 95.4 | 83.0 | 1.15 | 0.0000 | 0.0963 | 0.0014 | 3.4045  | 0.0614 | 0.2574 | 0.0042 | 0.9092 | 1554 | 28.08 | 1505 | 14.20 | 1477 | 21.66 | 5.2   |
| FC57-1-87                                        | 185  | 73.0 | 223  | 0.33 | 21.5   | 0.1163 | 0.0012 | 5.2376  | 0.0837 | 0.3270 | 0.0051 | 0.9674 | 1900 | 18.52 | 1859 | 13.69 | 1824 | 24.58 | 4.2   |
| FC57-1-88                                        | 167  | 79.0 | 168  | 0.47 | 7.57   | 0.1113 | 0.0012 | 4.9243  | 0.0834 | 0.3216 | 0.0056 | 1.0208 | 1820 | 14.05 | 1806 | 14.34 | 1797 | 27.13 | 1.3   |
| FC57-1-89                                        | 267  | 248  | 234  | 1.06 | 0.0000 | 0.0804 | 0.0010 | 2.2740  | 0.0484 | 0.2054 | 0.0039 | 0.8845 | 1206 | 25.16 | 1204 | 15.04 | 1204 | 20.69 | 0.1   |
| FC57-1-90                                        | 94   | 66.9 | 67.2 | 1.00 | 0.0000 | 0.0966 | 0.0012 | 3.4780  | 0.0671 | 0.2616 | 0.0046 | 0.9047 | 1559 | 19.44 | 1522 | 15.24 | 1498 | 23.33 | 4.1   |
| FC57-1-91                                        | 180  | 131  | 137  | 0.96 | 0.0000 | 0.0905 | 0.0011 | 3.1890  | 0.0660 | 0.2558 | 0.0047 | 0.8789 | 1435 | 22.38 | 1454 | 16.02 | 1469 | 23.89 | -2.3  |
| FC57-1-92                                        | 190  | 64.4 | 76.1 | 0.85 | 0.0000 | 0.1862 | 0.0019 | 13.4429 | 0.2332 | 0.5238 | 0.0078 | 0.8614 | 2708 | 16.67 | 2711 | 16.50 | 2715 | 33.15 | -0.3  |
| FC57-1-93                                        | 350  | 270  | 199  | 1.36 | 0.0000 | 0.0913 | 0.0009 | 3.1346  | 0.0555 | 0.2492 | 0.0041 | 0.9243 | 1454 | 18.52 | 1441 | 13.65 | 1434 | 21.04 | 1.3   |
| FC57-1-94                                        | 90   | 90.4 | 102  | 0.89 | 27.6   | 0.0750 | 0.0012 | 1.8680  | 0.0335 | 0.1814 | 0.0028 | 0.8741 | 1069 | 32.87 | 1070 | 11.90 | 1075 | 15.55 | -0.5  |
| FC57-1-95                                        | 88   | 93.2 | 80.8 | 1.15 | 3.89   | 0.0738 | 0.0013 | 1.8188  | 0.0441 | 0.1784 | 0.0026 | 0.6078 | 1037 | 30.56 | 1052 | 15.91 | 1058 | 14.40 | -2.0  |
| FC57-1-96                                        | 76   | 71.6 | 73.2 | 0.98 | 15.3   | 0.0796 | 0.0014 | 2.1361  | 0.0565 | 0.1940 | 0.0031 | 0.6075 | 1188 | 34.10 | 1161 | 18.30 | 1143 | 16.83 | 4.0   |
| FC57-1-97                                        | 90   | 75.4 | 81.7 | 0.92 | 8.36   | 0.0829 | 0.0011 | 2.5111  | 0.0421 | 0.2198 | 0.0026 | 0.7032 | 1278 | 25.93 | 1275 | 12.22 | 1281 | 13.73 | -0.3  |
| FC57-1-98                                        | 352  | 270  | 208  | 1.30 | 0.0000 | 0.1011 | 0.0012 | 3.6222  | 0.0756 | 0.2617 | 0.0060 | 1.0958 | 1644 | 21.91 | 1554 | 16.65 | 1499 | 30.61 | 9.7   |
| FC57-1-99                                        | 127  | 88.0 | 144  | 0.61 | 0.0000 | 0.0889 | 0.0012 | 3.0388  | 0.0580 | 0.2482 | 0.0039 | 0.8308 | 1403 | 25.15 | 1417 | 14.62 | 1429 | 20.35 | -1.9  |
| FC57-1-100                                       | 197  | 151  | 122  | 1.23 | 30.8   | 0.0922 | 0.0014 | 2.9935  | 0.0609 | 0.2356 | 0.0033 | 0.6965 | 1472 | 29.63 | 1406 | 15.52 | 1364 | 17.44 | 8.0   |
| Rejected analyses (discordant > 10%, error > 5%) |      |      |      |      |        |        |        |         |        |        |        |        |      |       |      |       |      |       |       |
| FC57-1-04                                        | 243  | 170  | 245  | 0.69 | 180    | 0.1449 | 0.0034 | 2.3366  | 0.1148 | 0.1159 | 0.0038 | 0.6711 | 2287 | 36.11 | 1223 | 34.93 | 707  | 22.07 | 223.6 |
| FC57-1-05                                        | 46.3 | 41.3 | 38.0 | 1.08 | 2.9    | 0.0855 | 0.0022 | 2.3023  | 0.0686 | 0.1952 | 0.0031 | 0.5414 | 1328 | 50.31 | 1213 | 21.10 | 1149 | 16.98 | 15.5  |
| FC57-1-10                                        | 37.6 | 35.2 | 42.8 | 0.82 | 0.0000 | 0.0767 | 0.0021 | 1.8878  | 0.0576 | 0.1784 | 0.0024 | 0.4378 | 1115 | 54.79 | 1077 | 20.28 | 1058 | 13.06 | 5.3   |
| FC57-1-22                                        | 58.9 | 59.7 | 41.3 | 1.45 | 5.63   | 0.0772 | 0.0019 | 2.0542  | 0.0624 | 0.1940 | 0.0039 | 0.6630 | 1126 | 50.00 | 1134 | 20.77 | 1143 | 21.12 | -1.5  |
| FC57-1-23                                        | 101  | 87.1 | 115  | 0.75 | 4.87   | 0.0849 | 0.0017 | 2.2489  | 0.0527 | 0.1931 | 0.0035 | 0.7651 | 1322 | 38.43 | 1196 | 16.48 | 1138 | 18.70 | 16.2  |
| FC57-1-50                                        | 240  | 193  | 110  | 1.76 | 41.8   | 0.0941 | 0.0014 | 3.0320  | 0.0569 | 0.2335 | 0.0034 | 0.7823 | 1522 | 27.93 | 1416 | 14.36 | 1353 | 17.93 | 12.5  |
| FC57-1-66                                        | 436  | 338  | 190  | 1.77 | 0.0000 | 0.0986 | 0.0010 | 3.3409  | 0.0542 | 0.2459 | 0.0034 | 0.8414 | 1598 | 13.89 | 1491 | 12.71 | 1417 | 17.37 | 12.8  |
| FC57-1-76                                        | 245  | 233  | 107  | 2.17 | 11.8   | 0.0837 | 0.0014 | 2.2658  | 0.0464 | 0.1964 | 0.0026 | 0.6535 | 1284 | 31.48 | 1202 | 14.45 | 1156 | 14.18 | 11.1  |

**Sample 17TH-02-01 (41°44'27.67"N , 126° 01'32.48"E)**

|                         |     |      |      |      |        |        |        |        |        |        |        |        |      |       |      |       |      |       |      |
|-------------------------|-----|------|------|------|--------|--------|--------|--------|--------|--------|--------|--------|------|-------|------|-------|------|-------|------|
| <i>Detrital zircons</i> |     |      |      |      |        |        |        |        |        |        |        |        |      |       |      |       |      |       |      |
| 17TH-02-01-01           | 216 | 133  | 130  | 1.02 | 0.0000 | 0.1012 | 0.0022 | 3.9862 | 0.0843 | 0.2859 | 0.0056 | 0.9272 | 1656 | 40.74 | 1631 | 17.20 | 1621 | 28.11 | 2.1  |
| 17TH-02-01-04           | 125 | 71.6 | 97.7 | 0.73 | 42.6   | 0.0979 | 0.0019 | 3.7887 | 0.0789 | 0.2808 | 0.0059 | 1.0049 | 1585 | 36.73 | 1590 | 16.76 | 1595 | 29.57 | -0.6 |
| 17TH-02-01-05           | 291 | 178  | 188  | 0.95 | 0.0000 | 0.0958 | 0.0016 | 3.6981 | 0.0812 | 0.2796 | 0.0060 | 0.9743 | 1544 | 32.56 | 1571 | 17.58 | 1589 | 30.13 | -2.9 |
| 17TH-02-01-06           | 300 | 189  | 141  | 1.34 | 2.57   | 0.0990 | 0.0022 | 3.8205 | 0.0801 | 0.2802 | 0.0059 | 1.0025 | 1606 | 45.37 | 1597 | 16.91 | 1592 | 29.67 | 0.9  |

|               |      |      |      |      |        |        |        |         |        |        |        |        |      |       |      |       |      |       |      |
|---------------|------|------|------|------|--------|--------|--------|---------|--------|--------|--------|--------|------|-------|------|-------|------|-------|------|
| 17TH-02-01-07 | 176  | 101  | 119  | 0.85 | 0.0000 | 0.0965 | 0.0018 | 3.7255  | 0.0718 | 0.2796 | 0.0049 | 0.9161 | 1567 | 34.88 | 1577 | 15.47 | 1589 | 24.89 | -1.4 |
| 17TH-02-01-08 | 240  | 136  | 175  | 0.78 | 0.0000 | 0.1070 | 0.0024 | 4.6016  | 0.1198 | 0.3119 | 0.0071 | 0.8734 | 1750 | 42.44 | 1750 | 21.76 | 1750 | 34.88 | 0.0  |
| 17TH-02-01-09 | 1378 | 798  | 551  | 1.45 | 7.70   | 0.1067 | 0.0022 | 4.9054  | 0.1235 | 0.3329 | 0.0080 | 0.9569 | 1744 | 38.89 | 1803 | 21.27 | 1852 | 38.80 | -5.9 |
| 17TH-02-01-10 | 206  | 132  | 99   | 1.33 | 0.0000 | 0.0934 | 0.0022 | 3.4998  | 0.0991 | 0.2707 | 0.0057 | 0.7381 | 1498 | 43.37 | 1527 | 22.39 | 1544 | 28.72 | -3.0 |
| 17TH-02-01-11 | 258  | 93   | 101  | 0.92 | 0.0000 | 0.1631 | 0.0039 | 10.1358 | 0.2466 | 0.4500 | 0.0106 | 0.9696 | 2489 | 39.82 | 2447 | 22.55 | 2395 | 47.21 | 3.9  |
| 17TH-02-01-12 | 510  | 330  | 212  | 1.55 | 0.00   | 0.0998 | 0.0022 | 3.9886  | 0.0882 | 0.2913 | 0.0079 | 1.2327 | 1620 | 36.11 | 1632 | 17.98 | 1648 | 39.63 | -1.7 |
| 17TH-02-01-14 | 227  | 200  | 192  | 1.04 | 5.06   | 0.0815 | 0.0019 | 2.2977  | 0.0625 | 0.2040 | 0.0045 | 0.8038 | 1233 | 44.91 | 1212 | 19.27 | 1197 | 23.90 | 3.0  |
| 17TH-02-01-15 | 339  | 185  | 244  | 0.76 | 0.0000 | 0.1061 | 0.0020 | 4.5343  | 0.1292 | 0.3096 | 0.0088 | 1.0026 | 1800 | 34.41 | 1737 | 23.73 | 1739 | 43.53 | 3.5  |
| 17TH-02-01-16 | 264  | 93.8 | 346  | 0.27 | 14.4   | 0.1098 | 0.0022 | 4.9794  | 0.0968 | 0.3290 | 0.0062 | 0.9710 | 1796 | 36.42 | 1816 | 16.48 | 1834 | 30.13 | -2.1 |
| 17TH-02-01-18 | 139  | 123  | 93.2 | 1.32 | 33.0   | 0.0783 | 0.0014 | 2.2477  | 0.0516 | 0.2076 | 0.0043 | 0.8963 | 1155 | 35.19 | 1196 | 16.16 | 1216 | 22.82 | -5.0 |
| 17TH-02-01-19 | 265  | 171  | 181  | 0.94 | 45.5   | 0.0956 | 0.0020 | 3.5304  | 0.0756 | 0.2686 | 0.0067 | 1.1598 | 1543 | 39.35 | 1534 | 16.97 | 1534 | 33.91 | 0.6  |
| 17TH-02-01-21 | 629  | 408  | 323  | 1.26 | 40.0   | 0.0990 | 0.0019 | 3.9036  | 0.0883 | 0.2861 | 0.0065 | 1.0075 | 1606 | 37.04 | 1614 | 18.32 | 1622 | 32.69 | -1.0 |
| 17TH-02-01-22 | 568  | 331  | 412  | 0.80 | 0.0000 | 0.0987 | 0.0021 | 3.8327  | 0.0831 | 0.2833 | 0.0078 | 1.2614 | 1599 | 38.89 | 1600 | 17.50 | 1608 | 38.95 | -0.6 |
| 17TH-02-01-23 | 91   | 50.1 | 64.0 | 0.78 | 38.2   | 0.1010 | 0.0024 | 4.0570  | 0.0927 | 0.2920 | 0.0062 | 0.9252 | 1643 | 43.05 | 1646 | 18.65 | 1651 | 30.82 | -0.5 |
| 17TH-02-01-24 | 247  | 127  | 181  | 0.70 | 0.0000 | 0.1117 | 0.0023 | 4.9891  | 0.1142 | 0.3234 | 0.0058 | 0.7879 | 1828 | 38.12 | 1817 | 19.40 | 1806 | 28.43 | 1.2  |
| 17TH-02-01-25 | 295  | 182  | 213  | 0.86 | 18.6   | 0.0999 | 0.0019 | 3.7101  | 0.0989 | 0.2680 | 0.0050 | 0.7033 | 1622 | 35.18 | 1574 | 21.34 | 1531 | 25.55 | 5.9  |
| 17TH-02-01-26 | 256  | 125  | 203  | 0.61 | 0.0000 | 0.1081 | 0.0025 | 4.8868  | 0.1360 | 0.3285 | 0.0089 | 0.9739 | 1769 | 42.60 | 1800 | 23.50 | 1831 | 43.23 | -3.4 |
| 17TH-02-01-27 | 128  | 73.1 | 105  | 0.70 | 15.7   | 0.1004 | 0.0018 | 4.0693  | 0.0700 | 0.2943 | 0.0058 | 1.1464 | 1632 | 33.48 | 1648 | 14.06 | 1663 | 28.91 | -1.9 |
| 17TH-02-01-28 | 189  | 130  | 85.3 | 1.52 | 0.0000 | 0.0976 | 0.0021 | 3.8093  | 0.0806 | 0.2833 | 0.0057 | 0.9444 | 1589 | 40.74 | 1595 | 17.05 | 1608 | 28.45 | -1.2 |
| 17TH-02-01-29 | 156  | 136  | 118  | 1.15 | 27.8   | 0.0787 | 0.0018 | 2.1774  | 0.0601 | 0.2008 | 0.0048 | 0.8655 | 1165 | 46.30 | 1174 | 19.23 | 1180 | 25.78 | -1.3 |
| 17TH-02-01-30 | 415  | 278  | 248  | 1.12 | 24.4   | 0.1028 | 0.0024 | 4.0124  | 0.1015 | 0.2830 | 0.0066 | 0.9263 | 1676 | 42.90 | 1637 | 20.58 | 1606 | 33.32 | 4.3  |
| 17TH-02-01-31 | 135  | 115  | 107  | 1.07 | 5.66   | 0.0821 | 0.0019 | 2.3501  | 0.0619 | 0.2078 | 0.0047 | 0.8650 | 1256 | 46.30 | 1228 | 18.79 | 1217 | 25.29 | 3.2  |
| 17TH-02-01-32 | 110  | 68.0 | 71.7 | 0.95 | 29.2   | 0.1010 | 0.0026 | 4.0219  | 0.1141 | 0.2885 | 0.0061 | 0.7474 | 1643 | 46.76 | 1639 | 23.10 | 1634 | 30.62 | 0.5  |
| 17TH-02-01-33 | 743  | 463  | 496  | 0.93 | 0.0000 | 0.0982 | 0.0020 | 3.8632  | 0.1009 | 0.2853 | 0.0076 | 1.0155 | 1591 | 38.58 | 1606 | 21.10 | 1618 | 37.98 | -1.7 |
| 17TH-02-01-34 | 142  | 123  | 120  | 1.03 | 16.1   | 0.0788 | 0.0016 | 2.1199  | 0.0506 | 0.1947 | 0.0042 | 0.9006 | 1169 | 40.74 | 1155 | 16.48 | 1147 | 22.58 | 1.9  |
| 17TH-02-01-35 | 186  | 70.3 | 118  | 0.60 | 0.0000 | 0.1385 | 0.0027 | 8.1740  | 0.1963 | 0.4274 | 0.0097 | 0.9432 | 2209 | 33.33 | 2250 | 21.79 | 2294 | 43.75 | -3.7 |
| 17TH-02-01-36 | 252  | 173  | 102  | 1.69 | 0.0000 | 0.0996 | 0.0022 | 3.8008  | 0.0921 | 0.2762 | 0.0056 | 0.8406 | 1617 | 40.74 | 1593 | 19.51 | 1572 | 28.43 | 2.8  |
| 17TH-02-01-37 | 138  | 88.9 | 88.3 | 1.01 | 9.69   | 0.0955 | 0.0018 | 3.6803  | 0.0946 | 0.2781 | 0.0058 | 0.8123 | 1539 | 35.81 | 1567 | 20.55 | 1582 | 29.29 | -2.7 |
| 17TH-02-01-38 | 223  | 205  | 196  | 1.05 | 0.0000 | 0.0776 | 0.0019 | 2.1517  | 0.0760 | 0.1998 | 0.0052 | 0.7429 | 1139 | 48.15 | 1166 | 24.49 | 1174 | 28.17 | -3.0 |
| 17TH-02-01-39 | 156  | 139  | 125  | 1.11 | 0.0000 | 0.0768 | 0.0018 | 2.1165  | 0.0483 | 0.2002 | 0.0047 | 1.0401 | 1117 | 14.35 | 1154 | 15.75 | 1176 | 25.52 | -5.1 |
| 17TH-02-01-40 | 68   | 58.7 | 58.8 | 1.00 | 0.0000 | 0.0791 | 0.0024 | 2.2023  | 0.0598 | 0.2025 | 0.0049 | 0.8938 | 1176 | 58.18 | 1182 | 18.99 | 1189 | 26.37 | -1.1 |
| 17TH-02-01-41 | 323  | 194  | 205  | 0.95 | 13.4   | 0.1018 | 0.0028 | 3.9295  | 0.1139 | 0.2797 | 0.0082 | 1.0124 | 1658 | 51.39 | 1620 | 23.49 | 1590 | 41.36 | 4.3  |
| 17TH-02-01-42 | 206  | 182  | 162  | 1.12 | 10.8   | 0.0788 | 0.0017 | 2.1755  | 0.0550 | 0.1998 | 0.0045 | 0.8937 | 1166 | 42.59 | 1173 | 17.61 | 1174 | 24.28 | -0.7 |
| 17TH-02-01-43 | 281  | 171  | 218  | 0.78 | 0.0000 | 0.0976 | 0.0024 | 3.5311  | 0.0811 | 0.2621 | 0.0048 | 0.7916 | 1589 | 46.45 | 1534 | 18.19 | 1501 | 24.34 | 5.9  |
| 17TH-02-01-44 | 285  | 160  | 234  | 0.68 | 7.19   | 0.1044 | 0.0019 | 4.0620  | 0.0951 | 0.2816 | 0.0064 | 0.9651 | 1706 | 34.42 | 1647 | 19.10 | 1599 | 32.00 | 6.6  |
| 17TH-02-01-45 | 216  | 144  | 116  | 1.24 | 0.0000 | 0.1007 | 0.0020 | 3.8151  | 0.0885 | 0.2752 | 0.0071 | 1.1118 | 1636 | 36.26 | 1596 | 18.69 | 1567 | 35.88 | 4.4  |
| 17TH-02-01-47 | 427  | 265  | 264  | 1.00 | 0.0000 | 0.0988 | 0.0018 | 3.8471  | 0.0949 | 0.2819 | 0.0066 | 0.9526 | 1602 | 34.10 | 1603 | 19.90 | 1601 | 33.32 | 0.1  |
| 17TH-02-01-48 | 132  | 84.6 | 84.3 | 1.00 | 1.89   | 0.0971 | 0.0021 | 3.7707  | 0.0949 | 0.2821 | 0.0074 | 1.0351 | 1569 | 40.28 | 1587 | 20.23 | 1602 | 36.97 | -2.0 |
| 17TH-02-01-49 | 127  | 81.8 | 73.0 | 1.12 | 0.0000 | 0.0982 | 0.0022 | 3.8184  | 0.0889 | 0.2819 | 0.0058 | 0.8784 | 1591 | 40.74 | 1597 | 18.76 | 1601 | 29.01 | -0.6 |
| 17TH-02-01-50 | 344  | 163  | 266  | 0.61 | 0.00   | 0.1112 | 0.0022 | 5.1735  | 0.1317 | 0.3372 | 0.0080 | 0.9366 | 1820 | 35.65 | 1848 | 21.70 | 1873 | 38.77 | -2.8 |
| 17TH-02-01-51 | 124  | 104  | 114  | 0.91 | 0.82   | 0.0795 | 0.0017 | 2.1459  | 0.0561 | 0.1959 | 0.0048 | 0.9445 | 1187 | 42.59 | 1164 | 18.11 | 1153 | 26.06 | 2.9  |
| 17TH-02-01-52 | 186  | 95.5 | 164  | 0.58 | 1.19   | 0.1026 | 0.0022 | 4.1713  | 0.1015 | 0.2958 | 0.0075 | 1.0466 | 1672 | 45.37 | 1668 | 19.96 | 1671 | 37.49 | 0.1  |

|                                                  |       |      |       |      |        |        |        |         |        |        |        |        |      |       |      |       |      |       |      |
|--------------------------------------------------|-------|------|-------|------|--------|--------|--------|---------|--------|--------|--------|--------|------|-------|------|-------|------|-------|------|
| 17TH-02-01-53                                    | 260   | 143  | 175   | 0.82 | 0.0000 | 0.1097 | 0.0020 | 4.7663  | 0.1043 | 0.3146 | 0.0062 | 0.8936 | 1795 | 33.18 | 1779 | 18.41 | 1763 | 30.18 | 1.8  |
| 17TH-02-01-54                                    | 181   | 124  | 72.3  | 1.72 | 0.0000 | 0.0999 | 0.0021 | 3.9025  | 0.1063 | 0.2834 | 0.0074 | 0.9579 | 1622 | 38.89 | 1614 | 22.05 | 1608 | 37.17 | 0.8  |
| 17TH-02-01-55                                    | 214   | 144  | 250   | 0.58 | 0.0000 | 0.0851 | 0.0016 | 2.6958  | 0.0607 | 0.2303 | 0.0057 | 1.1006 | 1317 | 37.03 | 1327 | 16.70 | 1336 | 29.90 | -1.4 |
| 17TH-02-01-56                                    | 211   | 149  | 172   | 0.87 | 0.0000 | 0.0933 | 0.0018 | 3.3033  | 0.0870 | 0.2561 | 0.0059 | 0.8687 | 1494 | 35.80 | 1482 | 20.54 | 1470 | 30.07 | 1.7  |
| 17TH-02-01-57                                    | 96    | 40.3 | 24.6  | 1.64 | 0.0000 | 0.1646 | 0.0039 | 10.9352 | 0.2569 | 0.4834 | 0.0114 | 1.0058 | 2503 | 40.13 | 2518 | 21.92 | 2542 | 49.65 | -1.5 |
| 17TH-02-01-58                                    | 133   | 71.3 | 95.0  | 0.75 | 34.1   | 0.1097 | 0.0024 | 4.8135  | 0.1418 | 0.3184 | 0.0088 | 0.9391 | 1794 | 39.20 | 1787 | 24.80 | 1782 | 43.08 | 0.7  |
| 17TH-02-01-59                                    | 259   | 161  | 125   | 1.29 | 0.0000 | 0.1023 | 0.0020 | 4.1960  | 0.0975 | 0.2975 | 0.0070 | 1.0096 | 1666 | 35.18 | 1673 | 19.09 | 1679 | 34.71 | -0.8 |
| 17TH-02-01-60                                    | 686   | 288  | 145   | 1.99 | 0.0000 | 0.1669 | 0.0038 | 10.9033 | 0.3008 | 0.4731 | 0.0106 | 0.8136 | 2528 | 38.58 | 2515 | 25.71 | 2497 | 46.49 | 1.2  |
| 17TH-02-01-61                                    | 370   | 368  | 253   | 1.46 | 0.0000 | 0.0785 | 0.0017 | 2.0758  | 0.0437 | 0.1922 | 0.0043 | 1.0578 | 1161 | 75.00 | 1141 | 14.44 | 1133 | 23.14 | 2.5  |
| 17TH-02-01-62                                    | 328   | 146  | 230   | 0.63 | 0.0000 | 0.1254 | 0.0025 | 6.3517  | 0.1321 | 0.3679 | 0.0080 | 1.0505 | 2035 | 35.18 | 2026 | 18.29 | 2019 | 37.88 | 0.8  |
| 17TH-02-01-64                                    | 94    | 63.8 | 31.9  | 2.00 | 0.0000 | 0.1063 | 0.0024 | 4.2282  | 0.1230 | 0.2886 | 0.0072 | 0.8633 | 1737 | 47.22 | 1680 | 23.92 | 1635 | 36.28 | 6.3  |
| 17TH-02-01-66                                    | 152   | 132  | 139   | 0.95 | 0.0000 | 0.0822 | 0.0018 | 2.3454  | 0.0612 | 0.2073 | 0.0048 | 0.8820 | 1250 | 44.44 | 1226 | 18.60 | 1214 | 25.50 | 2.9  |
| 17TH-02-01-67                                    | 130   | 61.9 | 84.5  | 0.73 | 0.0000 | 0.1152 | 0.0023 | 5.9035  | 0.1566 | 0.3715 | 0.0095 | 0.9594 | 1884 | 36.88 | 1962 | 23.07 | 2036 | 44.44 | -7.5 |
| 17TH-02-01-69                                    | 159   | 137  | 162   | 0.85 | 6.04   | 0.0794 | 0.0018 | 2.2181  | 0.0567 | 0.2023 | 0.0034 | 0.6642 | 1183 | 41.66 | 1187 | 17.90 | 1188 | 18.41 | -0.4 |
| 17TH-02-01-70                                    | 241   | 184  | 120   | 1.53 | 14.1   | 0.0935 | 0.0018 | 3.5114  | 0.0946 | 0.2718 | 0.0061 | 0.8315 | 1498 | 41.51 | 1530 | 21.31 | 1550 | 30.87 | -3.3 |
| 17TH-02-01-71                                    | 278   | 193  | 123   | 1.57 | 18.7   | 0.1025 | 0.0024 | 4.0544  | 0.1072 | 0.2875 | 0.0071 | 0.9346 | 1670 | 43.52 | 1645 | 21.56 | 1629 | 35.58 | 2.5  |
| 17TH-02-01-72                                    | 195   | 187  | 183   | 1.02 | 8.29   | 0.0787 | 0.0016 | 2.1839  | 0.0588 | 0.2011 | 0.0046 | 0.8427 | 1165 | 40.74 | 1176 | 18.75 | 1181 | 24.48 | -1.4 |
| 17TH-02-01-73                                    | 183   | 113  | 134   | 0.84 | 0.0000 | 0.1000 | 0.0023 | 4.0405  | 0.1179 | 0.2933 | 0.0076 | 0.8855 | 1625 | 48.30 | 1642 | 23.77 | 1658 | 37.77 | -2.0 |
| 17TH-02-01-74                                    | 342   | 370  | 200   | 1.85 | 27.5   | 0.0751 | 0.0021 | 1.8736  | 0.0597 | 0.1814 | 0.0068 | 1.1770 | 1072 | 57.41 | 1072 | 21.10 | 1074 | 37.11 | -0.2 |
| 17TH-02-01-76                                    | 851   | 634  | 238   | 2.66 | 0.0000 | 0.1034 | 0.0027 | 3.9708  | 0.0834 | 0.2801 | 0.0074 | 1.2553 | 1687 | 47.07 | 1628 | 17.07 | 1592 | 37.19 | 6.0  |
| 17TH-02-01-77                                    | 284   | 177  | 195   | 0.91 | 0.0000 | 0.1020 | 0.0025 | 4.1154  | 0.1325 | 0.2923 | 0.0076 | 0.8089 | 1661 | 46.30 | 1657 | 26.33 | 1653 | 37.98 | 0.5  |
| 17TH-02-01-78                                    | 223   | 138  | 174   | 0.79 | 41.0   | 0.1002 | 0.0021 | 4.0576  | 0.0993 | 0.2933 | 0.0066 | 0.9198 | 1629 | 37.80 | 1646 | 19.98 | 1658 | 32.93 | -1.8 |
| 17TH-02-01-80                                    | 264   | 170  | 172   | 0.99 | 46.6   | 0.1047 | 0.0043 | 4.1677  | 0.2108 | 0.2865 | 0.0066 | 0.4537 | 1710 | 75.31 | 1668 | 41.44 | 1624 | 32.96 | 5.3  |
| 17TH-02-01-81                                    | 503   | 375  | 244   | 1.53 | 0.0000 | 0.0986 | 0.0023 | 3.8740  | 0.1120 | 0.2849 | 0.0073 | 0.8805 | 1598 | 44.44 | 1608 | 23.37 | 1616 | 36.41 | -1.1 |
| 17TH-02-01-82                                    | 285   | 179  | 187   | 0.96 | 33.1   | 0.1103 | 0.0036 | 4.7100  | 0.1602 | 0.3095 | 0.0070 | 0.6622 | 1806 | 60.96 | 1769 | 28.51 | 1738 | 34.32 | 3.9  |
| 17TH-02-01-83                                    | 271   | 177  | 203   | 0.87 | 0.0000 | 0.0958 | 0.0028 | 3.6267  | 0.1035 | 0.2742 | 0.0055 | 0.7033 | 1546 | 49.23 | 1555 | 22.74 | 1562 | 27.86 | -1.0 |
| 17TH-02-01-84                                    | 587   | 426  | 336   | 1.27 | 2.88   | 0.0971 | 0.0021 | 3.6323  | 0.0864 | 0.2720 | 0.0069 | 1.0623 | 1569 | 40.89 | 1557 | 18.97 | 1551 | 34.85 | 1.2  |
| 17TH-02-01-85                                    | 245   | 161  | 178   | 0.90 | 23.9   | 0.0981 | 0.0022 | 3.7113  | 0.1133 | 0.2753 | 0.0091 | 1.0869 | 1589 | 42.59 | 1574 | 24.44 | 1568 | 46.18 | 1.3  |
| 17TH-02-01-86                                    | 324   | 177  | 240   | 0.74 | 52.6   | 0.1069 | 0.0021 | 4.7058  | 0.0976 | 0.3190 | 0.0059 | 0.8995 | 1747 | 36.27 | 1768 | 17.41 | 1785 | 29.09 | -2.1 |
| 17TH-02-01-88                                    | 195   | 118  | 100.2 | 1.18 | 2.56   | 0.0986 | 0.0028 | 4.2677  | 0.1509 | 0.3129 | 0.0080 | 0.7214 | 1598 | 52.00 | 1687 | 29.12 | 1755 | 39.21 | -8.9 |
| 17TH-02-01-90                                    | 163   | 120  | 99.4  | 1.21 | 2.95   | 0.0909 | 0.0019 | 3.1243  | 0.0814 | 0.2485 | 0.0048 | 0.7415 | 1444 | 38.89 | 1439 | 20.06 | 1431 | 24.79 | 0.9  |
| 17TH-02-01-91                                    | 189   | 205  | 198   | 1.03 | 44.8   | 0.1105 | 0.0037 | 4.4329  | 0.1208 | 0.2924 | 0.0094 | 1.1855 | 1809 | 93.68 | 1719 | 22.61 | 1653 | 47.12 | 9.4  |
| 17TH-02-01-92                                    | 342   | 235  | 257   | 0.91 | 0.0000 | 0.0889 | 0.0021 | 2.9950  | 0.0995 | 0.2446 | 0.0078 | 0.9561 | 1411 | 44.45 | 1406 | 25.31 | 1410 | 40.25 | 0.1  |
| 17TH-02-01-94                                    | 250   | 210  | 228   | 0.92 | 22.3   | 0.0788 | 0.0016 | 2.2457  | 0.0427 | 0.2071 | 0.0040 | 1.0101 | 1166 | 39.97 | 1195 | 13.39 | 1213 | 21.27 | -3.9 |
| 17TH-02-01-95                                    | 440   | 308  | 328   | 0.94 | 34.0   | 0.1018 | 0.0021 | 3.7264  | 0.0984 | 0.2651 | 0.0062 | 0.8814 | 1657 | 37.04 | 1577 | 21.16 | 1516 | 31.44 | 9.3  |
| 17TH-02-01-98                                    | 141.3 | 23.8 | 311   | 0.08 | 0.0000 | 0.1058 | 0.0022 | 4.7661  | 0.1068 | 0.3273 | 0.0076 | 1.0318 | 1728 | 38.89 | 1779 | 18.84 | 1825 | 36.75 | -5.3 |
| 17TH-02-01-99                                    | 180   | 129  | 253   | 0.51 | 0.0000 | 0.0804 | 0.0023 | 2.2431  | 0.0821 | 0.2018 | 0.0052 | 0.7103 | 1207 | 56.32 | 1195 | 25.70 | 1185 | 28.13 | 1.9  |
| Rejected analyses (discordant > 10%, error > 5%) |       |      |       |      |        |        |        |         |        |        |        |        |      |       |      |       |      |       |      |
| 17TH-02-01-02                                    | 243   | 232  | 487   | 0.48 | 38.5   | 0.0903 | 0.0027 | 2.4864  | 0.1117 | 0.1991 | 0.0070 | 0.7866 | 1431 | 57.26 | 1268 | 32.55 | 1170 | 37.83 | 22.3 |
| 17TH-02-01-03                                    | 393   | 273  | 383   | 0.71 | 10.4   | 0.0889 | 0.0017 | 2.6576  | 0.0543 | 0.2168 | 0.0042 | 0.9565 | 1411 | 37.04 | 1317 | 15.11 | 1265 | 22.47 | 11.5 |
| 17TH-02-01-13                                    | 104   | 96.3 | 65.4  | 1.47 | 15.2   | 0.0871 | 0.0042 | 2.2596  | 0.1651 | 0.1864 | 0.0077 | 0.5638 | 1363 | 87.97 | 1200 | 51.44 | 1102 | 41.74 | 23.6 |
| 17TH-02-01-17                                    | 348   | 425  | 465   | 0.91 | 16.1   | 0.0853 | 0.0020 | 2.0674  | 0.0713 | 0.1753 | 0.0050 | 0.8220 | 1324 | 46.14 | 1138 | 23.60 | 1041 | 27.25 | 27.1 |

|                |     |      |     |      |        |        |        |        |        |        |        |        |      |       |      |       |      |       |      |
|----------------|-----|------|-----|------|--------|--------|--------|--------|--------|--------|--------|--------|------|-------|------|-------|------|-------|------|
| 17TH-02-01-20  | 744 | 660  | 304 | 2.17 | 47.8   | 0.0988 | 0.0024 | 3.0236 | 0.1126 | 0.2224 | 0.0082 | 0.9952 | 2000 | 50.46 | 1414 | 28.43 | 1295 | 43.48 | 54.5 |
| 17TH-02-01-46  | 387 | 191  | 320 | 0.60 | 21.4   | 0.1117 | 0.0026 | 4.4699 | 0.1314 | 0.2900 | 0.0077 | 0.8990 | 1828 | 40.90 | 1725 | 24.42 | 1642 | 38.32 | 11.4 |
| 17TH-02-01-63  | 364 | 300  | 288 | 1.04 | 0.0000 | 0.0997 | 0.0022 | 3.1379 | 0.0925 | 0.2284 | 0.0069 | 1.0280 | 1620 | 36.11 | 1442 | 22.72 | 1326 | 36.34 | 22.2 |
| 17TH-02-01-65  | 485 | 342  | 407 | 0.84 | 0.0000 | 0.0968 | 0.0025 | 3.2490 | 0.1407 | 0.2424 | 0.0083 | 0.7913 | 1565 | 49.23 | 1469 | 33.63 | 1399 | 43.09 | 11.8 |
| 17TH-02-01-68  | 475 | 352  | 479 | 0.73 | 24.9   | 0.1052 | 0.0024 | 3.6746 | 0.1159 | 0.2531 | 0.0065 | 0.8145 | 1718 | 42.59 | 1566 | 25.20 | 1454 | 33.46 | 18.1 |
| 17TH-02-01-75  | 406 | 305  | 611 | 0.50 | 13.9   | 0.1016 | 0.0026 | 2.7769 | 0.2023 | 0.1958 | 0.0118 | 0.8248 | 1654 | 48.15 | 1349 | 54.40 | 1153 | 63.43 | 43.5 |
| 17TH-02-01-79  | 689 | 689  | 527 | 1.31 | 56.5   | 0.1003 | 0.0022 | 2.8342 | 0.0791 | 0.2049 | 0.0055 | 0.9558 | 1629 | 42.43 | 1365 | 20.96 | 1202 | 29.24 | 35.6 |
| 17TH-02-01-87  | 251 | 337  | 404 | 0.83 | 25.9   | 0.0844 | 0.0026 | 2.0448 | 0.1023 | 0.1760 | 0.0094 | 1.0623 | 1302 | 60.96 | 1131 | 34.14 | 1045 | 51.31 | 24.5 |
| 17TH-02-01-89  | 616 | 442  | 534 | 0.83 | 47.2   | 0.0951 | 0.0020 | 3.0207 | 0.0960 | 0.2305 | 0.0075 | 1.0227 | 1531 | 34.42 | 1413 | 24.25 | 1337 | 39.24 | 14.5 |
| 17TH-02-01-93  | 612 | 475  | 470 | 1.01 | 34.3   | 0.0951 | 0.0035 | 2.8379 | 0.1464 | 0.2162 | 0.0090 | 0.8107 | 1531 | 68.52 | 1366 | 38.74 | 1262 | 47.92 | 21.4 |
| 17TH-02-01-96  | 539 | 717  | 407 | 1.76 | 89.7   | 0.1035 | 0.0028 | 3.3460 | 0.1647 | 0.2382 | 0.0142 | 1.2113 | 1687 | 49.69 | 1492 | 38.50 | 1377 | 73.96 | 22.5 |
| 17TH-02-01-97  | 698 | 1151 | 491 | 2.35 | 61.0   | 0.0997 | 0.0024 | 2.4059 | 0.1447 | 0.1748 | 0.0104 | 0.9857 | 1620 | 44.13 | 1244 | 43.13 | 1039 | 56.86 | 56.0 |
| 17TH-02-01-100 | 380 | 209  | 546 | 0.38 | 41.9   | 0.0968 | 0.0022 | 3.0522 | 0.1080 | 0.2282 | 0.0073 | 0.9071 | 1565 | 42.75 | 1421 | 27.08 | 1325 | 38.46 | 18.1 |

Sample 17TH-09-01 (41°41'38.00"N, 126° 09'11.62"E)

*Detrital zircons*

|               |      |       |      |      |        |        |        |         |        |        |        |        |      |       |      |       |      |       |      |
|---------------|------|-------|------|------|--------|--------|--------|---------|--------|--------|--------|--------|------|-------|------|-------|------|-------|------|
| 17TH-09-01-03 | 244  | 182   | 103  | 1.76 | 0.74   | 0.0803 | 0.0015 | 2.1120  | 0.0361 | 0.1914 | 0.0048 | 1.4818 | 1203 | 35.18 | 1153 | 11.80 | 1129 | 26.22 | 6.6  |
| 17TH-09-01-08 | 151  | 70.1  | 73.4 | 0.96 | 10.6   | 0.1012 | 0.0018 | 4.0317  | 0.1019 | 0.2890 | 0.0061 | 0.8285 | 1656 | 33.34 | 1641 | 20.59 | 1636 | 30.27 | 1.2  |
| 17TH-09-01-09 | 137  | 61.2  | 98   | 0.63 | 2.2082 | 0.0912 | 0.0013 | 3.3178  | 0.0694 | 0.2635 | 0.0044 | 0.7907 | 1450 | 21.76 | 1485 | 16.36 | 1508 | 22.27 | -3.8 |
| 17TH-09-01-10 | 219  | 74.2  | 147  | 0.50 | 4.73   | 0.1084 | 0.0011 | 4.8865  | 0.0916 | 0.3266 | 0.0058 | 0.9512 | 1773 | 18.52 | 1800 | 15.85 | 1822 | 28.31 | -2.7 |
| 17TH-09-01-13 | 150  | 143   | 146  | 0.98 | 1.88   | 0.0768 | 0.0011 | 1.9359  | 0.0407 | 0.1827 | 0.0037 | 0.9526 | 1117 | 29.63 | 1094 | 14.11 | 1082 | 19.97 | 3.2  |
| 17TH-09-01-14 | 104  | 67.1  | 70.9 | 0.95 | 0.9428 | 0.0775 | 0.0015 | 2.2176  | 0.0377 | 0.2084 | 0.0042 | 1.1909 | 1144 | 38.89 | 1187 | 11.92 | 1220 | 22.50 | -6.2 |
| 17TH-09-01-15 | 271  | 134   | 169  | 0.80 | 0.0000 | 0.0896 | 0.0009 | 3.1965  | 0.0502 | 0.2585 | 0.0042 | 1.0304 | 1417 | 20.37 | 1456 | 12.19 | 1482 | 21.45 | -4.4 |
| 17TH-09-01-17 | 95   | 46.2  | 27.4 | 1.69 | 4.26   | 0.0947 | 0.0018 | 3.7396  | 0.0900 | 0.2855 | 0.0037 | 0.5425 | 1521 | 39.82 | 1580 | 19.32 | 1619 | 18.72 | -6.0 |
| 17TH-09-01-18 | 148  | 74.6  | 116  | 0.64 | 0.0000 | 0.0919 | 0.0016 | 3.2973  | 0.0534 | 0.2604 | 0.0040 | 0.9563 | 1465 | 32.87 | 1480 | 12.66 | 1492 | 20.64 | -1.8 |
| 17TH-09-01-21 | 296  | 195   | 175  | 1.11 | 7.8    | 0.0848 | 0.0015 | 2.4377  | 0.0508 | 0.2083 | 0.0040 | 0.9268 | 1311 | 35.18 | 1254 | 15.03 | 1220 | 21.48 | 7.5  |
| 17TH-09-01-23 | 132  | 81.7  | 168  | 0.49 | 7.91   | 0.1073 | 0.0013 | 4.2463  | 0.1074 | 0.2871 | 0.0074 | 1.0207 | 1754 | 22.38 | 1683 | 20.83 | 1627 | 37.15 | 7.8  |
| 17TH-09-01-24 | 259  | 112   | 212  | 0.53 | 0.0000 | 0.0928 | 0.0012 | 3.4439  | 0.0841 | 0.2686 | 0.0058 | 0.8819 | 1484 | 24.07 | 1514 | 19.25 | 1534 | 29.42 | -3.2 |
| 17TH-09-01-26 | 75.1 | 16.8  | 54.1 | 0.31 | 0.0000 | 0.1444 | 0.0018 | 8.6406  | 0.1601 | 0.4335 | 0.0073 | 0.9130 | 2281 | 21.91 | 2301 | 16.93 | 2322 | 32.99 | -1.8 |
| 17TH-09-01-28 | 185  | 141   | 66.2 | 2.14 | 14.7   | 0.0782 | 0.0015 | 2.2269  | 0.0487 | 0.2067 | 0.0036 | 0.8069 | 1154 | 38.43 | 1190 | 15.33 | 1211 | 19.48 | -4.7 |
| 17TH-09-01-29 | 333  | 96.5  | 136  | 0.71 | 9.31   | 0.1520 | 0.0018 | 9.7006  | 0.1970 | 0.4623 | 0.0085 | 0.9068 | 2369 | 19.29 | 2407 | 18.76 | 2450 | 37.55 | -3.3 |
| 17TH-09-01-34 | 169  | 122   | 85.0 | 1.43 | 3.97   | 0.0789 | 0.0009 | 2.1813  | 0.0337 | 0.2004 | 0.0032 | 1.0370 | 1172 | 24.07 | 1175 | 10.80 | 1177 | 17.27 | -0.4 |
| 17TH-09-01-37 | 283  | 199   | 142  | 1.40 | 0.0000 | 0.0803 | 0.0012 | 2.2371  | 0.0438 | 0.2018 | 0.0034 | 0.8699 | 1203 | 27.78 | 1193 | 13.78 | 1185 | 18.47 | 1.5  |
| 17TH-09-01-39 | 163  | 106   | 124  | 0.86 | 0.0000 | 0.0826 | 0.0020 | 2.2678  | 0.0629 | 0.1985 | 0.0028 | 0.5162 | 1259 | 46.30 | 1202 | 19.57 | 1167 | 15.31 | 7.8  |
| 17TH-09-01-40 | 183  | 101.5 | 70.5 | 1.44 | 8.58   | 0.0935 | 0.0014 | 3.2697  | 0.0738 | 0.2528 | 0.0046 | 0.7979 | 1499 | 27.78 | 1474 | 17.59 | 1453 | 23.45 | 3.2  |
| 17TH-09-01-41 | 99   | 73.5  | 29.7 | 2.48 | 0.0000 | 0.0761 | 0.0016 | 1.9013  | 0.0446 | 0.1812 | 0.0030 | 0.7041 | 1098 | 43.06 | 1082 | 15.64 | 1073 | 16.36 | 2.3  |
| 17TH-09-01-42 | 93   | 62.2  | 48.1 | 1.29 | 4.89   | 0.0795 | 0.0012 | 2.1908  | 0.0447 | 0.1997 | 0.0039 | 0.9552 | 1187 | 30.71 | 1178 | 14.24 | 1174 | 20.92 | 1.1  |
| 17TH-09-01-43 | 225  | 101.7 | 151  | 0.67 | 3.44   | 0.1038 | 0.0014 | 4.1684  | 0.0748 | 0.2915 | 0.0053 | 1.0208 | 1692 | 19.60 | 1668 | 14.74 | 1649 | 26.66 | 2.6  |
| 17TH-09-01-45 | 851  | 214   | 207  | 1.04 | 0.0000 | 0.2556 | 0.0027 | 21.1340 | 0.3967 | 0.5988 | 0.0096 | 0.8536 | 3219 | 16.36 | 3145 | 18.32 | 3025 | 38.72 | 6.4  |
| 17TH-09-01-47 | 67   | 35.4  | 45.3 | 0.78 | 3.00   | 0.0901 | 0.0021 | 3.0451  | 0.0890 | 0.2450 | 0.0043 | 0.5943 | 1428 | 45.53 | 1419 | 22.35 | 1413 | 22.04 | 1.1  |
| 17TH-09-01-51 | 141  | 68.8  | 77.1 | 0.89 | 0.0000 | 0.0950 | 0.0015 | 3.6498  | 0.0636 | 0.2794 | 0.0044 | 0.9079 | 1528 | 34.26 | 1560 | 13.93 | 1589 | 22.29 | -3.8 |
| 17TH-09-01-52 | 153  | 64.8  | 86.9 | 0.75 | 0.0000 | 0.1043 | 0.0028 | 4.1895  | 0.1100 | 0.2932 | 0.0117 | 1.5246 | 1702 | 49.23 | 1672 | 21.56 | 1658 | 58.54 | 2.7  |

|                                                  |      |       |       |      |        |        |        |         |        |        |        |        |      |        |      |       |      |       |       |
|--------------------------------------------------|------|-------|-------|------|--------|--------|--------|---------|--------|--------|--------|--------|------|--------|------|-------|------|-------|-------|
| 17TH-09-01-55                                    | 333  | 202   | 110   | 1.84 | 0.0000 | 0.1068 | 0.0013 | 4.1325  | 0.0708 | 0.2812 | 0.0049 | 1.0120 | 1746 | 22.22  | 1661 | 14.06 | 1597 | 24.56 | 9.3   |
| 17TH-09-01-57                                    | 112  | 73.8  | 62.9  | 1.17 | 22.7   | 0.0824 | 0.0010 | 2.3962  | 0.0401 | 0.2110 | 0.0031 | 0.8689 | 1255 | 24.08  | 1241 | 12.03 | 1234 | 16.36 | 1.7   |
| 17TH-09-01-58                                    | 56.3 | 42.2  | 27.1  | 1.56 | 0.0000 | 0.0804 | 0.0019 | 2.1741  | 0.0658 | 0.1960 | 0.0041 | 0.6874 | 1207 | 46.29  | 1173 | 21.06 | 1154 | 21.98 | 4.6   |
| 17TH-09-01-59                                    | 263  | 138   | 157   | 0.88 | 21.0   | 0.0997 | 0.0017 | 3.8624  | 0.0699 | 0.2819 | 0.0051 | 0.9964 | 1620 | 31.63  | 1606 | 14.63 | 1601 | 25.56 | 1.2   |
| 17TH-09-01-62                                    | 78   | 53.2  | 43.1  | 1.23 | 4.04   | 0.0785 | 0.0019 | 2.2280  | 0.0475 | 0.2067 | 0.0038 | 0.8593 | 1161 | 43.52  | 1190 | 14.96 | 1211 | 20.24 | -4.2  |
| 17TH-09-01-64                                    | 107  | 74    | 61.5  | 1.20 | 0.0000 | 0.0778 | 0.0015 | 2.2138  | 0.0463 | 0.2066 | 0.0039 | 0.8990 | 1143 | 37.50  | 1185 | 14.66 | 1211 | 20.78 | -5.6  |
| 17TH-09-01-67                                    | 122  | 73.7  | 100.2 | 0.74 | 11.6   | 0.0836 | 0.0015 | 2.5468  | 0.0544 | 0.2212 | 0.0043 | 0.9055 | 1283 | 34.42  | 1286 | 15.60 | 1288 | 22.59 | -0.4  |
| 17TH-09-01-68                                    | 237  | 100.2 | 184   | 0.54 | 13.6   | 0.1070 | 0.0015 | 4.5862  | 0.1079 | 0.3107 | 0.0080 | 1.0942 | 1750 | 25.93  | 1747 | 19.66 | 1744 | 39.37 | 0.3   |
| 17TH-09-01-69                                    | 136  | 47.6  | 234   | 0.20 | 0.67   | 0.0960 | 0.0011 | 3.6154  | 0.0593 | 0.2727 | 0.0038 | 0.8603 | 1547 | 21.45  | 1553 | 13.10 | 1554 | 19.52 | -0.5  |
| 17TH-09-01-71                                    | 74   | 49.6  | 30.2  | 1.64 | 2.22   | 0.0833 | 0.0024 | 2.4195  | 0.0743 | 0.2109 | 0.0051 | 0.7815 | 1277 | 56.02  | 1248 | 22.07 | 1233 | 26.93 | 3.5   |
| 17TH-09-01-73                                    | 239  | 165   | 165   | 1.00 | 0.0000 | 0.0791 | 0.0010 | 2.3434  | 0.0531 | 0.2148 | 0.0049 | 1.0057 | 1174 | 24.07  | 1226 | 16.15 | 1254 | 25.98 | -6.4  |
| 17TH-09-01-75                                    | 118  | 83.7  | 158   | 0.53 | 11.4   | 0.0748 | 0.0013 | 1.8356  | 0.0348 | 0.1784 | 0.0036 | 1.0584 | 1063 | 35.19  | 1058 | 12.47 | 1058 | 19.57 | 0.4   |
| 17TH-09-01-76                                    | 97   | 44.7  | 47.3  | 0.95 | 3.34   | 0.0969 | 0.0015 | 4.0140  | 0.1030 | 0.2998 | 0.0062 | 0.8060 | 1565 | 29.47  | 1637 | 20.88 | 1690 | 30.76 | -7.4  |
| 17TH-09-01-78                                    | 234  | 138   | 94.6  | 1.45 | 13.6   | 0.1041 | 0.0021 | 4.2708  | 0.1249 | 0.2972 | 0.0070 | 0.8097 | 1699 | 37.35  | 1688 | 24.08 | 1677 | 34.97 | 1.3   |
| 17TH-09-01-80                                    | 99   | 61.4  | 92.7  | 0.66 | 18.7   | 0.0798 | 0.0019 | 2.1839  | 0.0550 | 0.1984 | 0.0030 | 0.6041 | 1191 | 45.21  | 1176 | 17.56 | 1167 | 16.26 | 2.0   |
| 17TH-09-01-89                                    | 255  | 71.8  | 91.2  | 0.79 | 3.53   | 0.1630 | 0.0020 | 10.8434 | 0.1729 | 0.4818 | 0.0069 | 0.9033 | 2487 | 21.46  | 2510 | 14.92 | 2535 | 30.21 | -1.9  |
| 17TH-09-01-90                                    | 191  | 98.2  | 141   | 0.70 | 0.0000 | 0.1117 | 0.0020 | 4.6915  | 0.1045 | 0.3049 | 0.0066 | 0.9662 | 1828 | 32.10  | 1766 | 18.69 | 1716 | 32.44 | 6.5   |
| 17TH-09-01-102                                   | 84   | 67.4  | 110   | 0.61 | 0.0000 | 0.0824 | 0.0014 | 2.2331  | 0.0437 | 0.1966 | 0.0024 | 0.6269 | 1257 | 26.86  | 1191 | 13.76 | 1157 | 13.01 | 8.7   |
| 17TH-09-01-103                                   | 190  | 196   | 136   | 1.44 | 0.0000 | 0.0803 | 0.0013 | 2.0577  | 0.0412 | 0.1860 | 0.0026 | 0.6987 | 1206 | 31.48  | 1135 | 13.71 | 1100 | 14.16 | 9.6   |
| 17TH-09-01-108                                   | 206  | 142   | 92.9  | 1.53 | 25.1   | 0.0993 | 0.0018 | 3.4803  | 0.0670 | 0.2546 | 0.0033 | 0.6716 | 1610 | 34.10  | 1523 | 15.21 | 1462 | 16.92 | 10.1  |
| 17TH-09-01-114                                   | 403  | 241   | 311   | 0.77 | 26.0   | 0.1148 | 0.0013 | 4.8679  | 0.0794 | 0.3074 | 0.0037 | 0.7282 | 1876 | 20.37  | 1797 | 13.79 | 1728 | 18.02 | 8.6   |
| 17TH-09-01-115                                   | 113  | 81.6  | 113   | 0.72 | 24.1   | 0.0859 | 0.0011 | 2.6679  | 0.0412 | 0.2252 | 0.0021 | 0.5960 | 1400 | 25.16  | 1320 | 11.45 | 1309 | 10.94 | 6.9   |
| 17TH-09-01-119                                   | 163  | 144   | 168   | 0.85 | 8.15   | 0.0812 | 0.0012 | 2.2094  | 0.0457 | 0.1974 | 0.0030 | 0.7458 | 1228 | 30.71  | 1184 | 14.49 | 1161 | 16.42 | 5.7   |
| 17TH-09-01-120                                   | 135  | 129   | 115   | 1.12 | 19.7   | 0.0784 | 0.0017 | 2.0355  | 0.0531 | 0.1886 | 0.0033 | 0.6770 | 1167 | 37.96  | 1127 | 17.76 | 1114 | 18.06 | 4.7   |
| 17TH-09-01-123                                   | 230  | 217   | 229   | 0.95 | 0.0000 | 0.0937 | 0.0011 | 3.1463  | 0.0519 | 0.2441 | 0.0039 | 0.9797 | 1502 | 22.68  | 1444 | 12.75 | 1408 | 20.47 | 6.7   |
| 17TH-09-01-126                                   | 67   | 70.1  | 44.9  | 1.56 | 9.8    | 0.0754 | 0.0017 | 1.9115  | 0.0491 | 0.1839 | 0.0028 | 0.5882 | 1080 | 44.44  | 1085 | 17.15 | 1088 | 15.15 | -0.8  |
| 17TH-09-01-128                                   | 200  | 189   | 149   | 1.27 | 0.0000 | 0.0781 | 0.0017 | 2.0004  | 0.0372 | 0.1860 | 0.0027 | 0.7720 | 1150 | 42.13  | 1116 | 12.63 | 1100 | 14.55 | 4.6   |
| 17TH-09-01-130                                   | 280  | 237   | 383   | 0.62 | 0.0000 | 0.0796 | 0.0012 | 2.0418  | 0.0428 | 0.1859 | 0.0030 | 0.7741 | 1187 | 25.46  | 1130 | 14.32 | 1099 | 16.42 | 8.0   |
| 17TH-09-01-131                                   | 186  | 181   | 138   | 1.31 | 38.4   | 0.0793 | 0.0012 | 2.0444  | 0.0379 | 0.1870 | 0.0026 | 0.7485 | 1189 | 29.63  | 1130 | 12.67 | 1105 | 14.11 | 7.6   |
| 17TH-09-01-132                                   | 200  | 222   | 105   | 2.11 | 0.0000 | 0.0770 | 0.0013 | 1.9307  | 0.0350 | 0.1820 | 0.0023 | 0.6858 | 1120 | 34.11  | 1092 | 12.16 | 1078 | 12.36 | 3.9   |
| 17TH-09-01-135                                   | 181  | 156   | 117   | 1.34 | 0.0000 | 0.0868 | 0.0018 | 2.5930  | 0.0537 | 0.2169 | 0.0028 | 0.6246 | 1355 | 38.89  | 1299 | 15.21 | 1266 | 14.89 | 7.1   |
| 17TH-09-01-138                                   | 363  | 219   | 143   | 1.53 | 0.0000 | 0.1105 | 0.0014 | 4.8246  | 0.0929 | 0.3162 | 0.0047 | 0.7635 | 1809 | 23.30  | 1789 | 16.25 | 1771 | 22.80 | 2.1   |
| Rejected analyses (discordant > 10%, error > 5%) |      |       |       |      |        |        |        |         |        |        |        |        |      |        |      |       |      |       |       |
| 17TH-09-01-01                                    | 484  | 446   | 321   | 1.39 | 3.72   | 0.0780 | 0.0010 | 1.7096  | 0.0725 | 0.1579 | 0.0057 | 0.8529 | 1146 | 26.39  | 1012 | 27.18 | 945  | 31.80 | 21.3  |
| 17TH-09-01-02                                    | 123  | 74.5  | 67.0  | 1.11 | 6.5    | 0.1114 | 0.0022 | 4.2933  | 0.0865 | 0.2803 | 0.0058 | 1.0247 | 1822 | 35.34  | 1692 | 16.63 | 1593 | 29.14 | 14.4  |
| 17TH-09-01-04                                    | 263  | 179   | 162   | 1.10 | 5.37   | 0.0844 | 0.0013 | 2.2929  | 0.0443 | 0.1970 | 0.0036 | 0.9427 | 1302 | 30.10  | 1210 | 13.69 | 1159 | 19.34 | 12.3  |
| 17TH-09-01-05                                    | 460  | 779   | 590   | 1.32 | 20.5   | 0.0771 | 0.0011 | 0.9127  | 0.0384 | 0.0856 | 0.0031 | 0.8621 | 1124 | 28.55  | 658  | 20.39 | 530  | 18.45 | 112.2 |
| 17TH-09-01-06                                    | 244  | 234   | 78    | 3.02 | 0.00   | 0.1037 | 0.0010 | 3.1806  | 0.0992 | 0.2219 | 0.0063 | 0.9113 | 1700 | 18.37  | 1452 | 24.12 | 1292 | 33.29 | 31.6  |
| 17TH-09-01-07                                    | 305  | 304   | 269   | 1.13 | 15.6   | 0.0838 | 0.0018 | 1.8355  | 0.0872 | 0.1573 | 0.0052 | 0.6898 | 1287 | 36.27  | 1058 | 31.25 | 942  | 28.73 | 36.6  |
| 17TH-09-01-11                                    | 143  | 85.5  | 68.7  | 1.24 | 31.6   | 0.1284 | 0.0081 | 3.7666  | 0.3062 | 0.2061 | 0.0051 | 0.3038 | 2077 | 111.42 | 1586 | 65.24 | 1208 | 27.21 | 72.0  |
| 17TH-09-01-12                                    | 545  | 330   | 238   | 1.38 | 14.4   | 0.1471 | 0.0016 | 6.3660  | 0.1423 | 0.3137 | 0.0071 | 1.0108 | 2313 | 18.83  | 2028 | 19.67 | 1759 | 34.79 | 31.5  |
| 17TH-09-01-16                                    | 572  | 845   | 383   | 2.21 | 19.2   | 0.1078 | 0.0019 | 2.3258  | 0.0927 | 0.1571 | 0.0074 | 1.1835 | 1765 | 31.64  | 1220 | 28.30 | 940  | 41.26 | 87.7  |

|               |      |     |       |      |        |        |        |         |        |        |        |        |      |         |      |       |      |       |       |
|---------------|------|-----|-------|------|--------|--------|--------|---------|--------|--------|--------|--------|------|---------|------|-------|------|-------|-------|
| 17TH-09-01-19 | 519  | 262 | 131   | 2.00 | 8.5275 | 0.2309 | 0.0026 | 14.7378 | 0.3211 | 0.4616 | 0.0091 | 0.9010 | 3058 | 18.52   | 2798 | 20.81 | 2447 | 40.00 | 25.0  |
| 17TH-09-01-20 | 457  | 449 | 214   | 2.10 | 3.47   | 0.0811 | 0.0011 | 1.7561  | 0.0623 | 0.1564 | 0.0049 | 0.8820 | 1225 | 27.77   | 1029 | 22.98 | 937  | 27.30 | 30.8  |
| 17TH-09-01-22 | 286  | 646 | 347   | 1.86 | 26.1   | 0.0838 | 0.0019 | 1.4232  | 0.0428 | 0.1230 | 0.0027 | 0.7254 | 1288 | 43.98   | 899  | 17.94 | 748  | 15.40 | 72.3  |
| 17TH-09-01-25 | 325  | 353 | 216   | 1.63 | 27.2   | 0.0859 | 0.0014 | 2.2263  | 0.0588 | 0.1878 | 0.0043 | 0.8618 | 1400 | 31.48   | 1189 | 18.52 | 1110 | 23.21 | 26.2  |
| 17TH-09-01-27 | 212  | 105 | 105   | 0.99 | 5.38   | 0.1126 | 0.0019 | 4.5473  | 0.0869 | 0.2934 | 0.0059 | 1.0539 | 1843 | 31.02   | 1740 | 15.96 | 1659 | 29.48 | 11.1  |
| 17TH-09-01-30 | 205  | 189 | 191   | 0.99 | 11.8   | 0.0984 | 0.0016 | 3.0857  | 0.0837 | 0.2274 | 0.0060 | 0.9680 | 1594 | 29.78   | 1429 | 20.83 | 1321 | 31.37 | 20.7  |
| 17TH-09-01-31 | 210  | 141 | 247   | 0.57 | 0.0000 | 0.0785 | 0.0012 | 1.8439  | 0.0744 | 0.1689 | 0.0056 | 0.8147 | 1161 | 29.63   | 1061 | 26.59 | 1006 | 30.65 | 15.4  |
| 17TH-09-01-32 | 346  | 259 | 276   | 0.94 | 3.81   | 0.0923 | 0.0023 | 2.7253  | 0.1196 | 0.2128 | 0.0065 | 0.6913 | 1474 | 47.38   | 1335 | 32.62 | 1244 | 34.33 | 18.5  |
| 17TH-09-01-33 | 451  | 417 | 217   | 1.92 | 20.05  | 0.0972 | 0.0022 | 2.5174  | 0.1062 | 0.1861 | 0.0048 | 0.6052 | 1572 | 42.59   | 1277 | 30.67 | 1100 | 25.83 | 42.9  |
| 17TH-09-01-35 | 333  | 230 | 202   | 1.14 | 15.2   | 0.1047 | 0.0012 | 3.9021  | 0.1400 | 0.2704 | 0.0102 | 1.0557 | 1710 | 21.76   | 1614 | 29.03 | 1543 | 51.98 | 10.8  |
| 17TH-09-01-36 | 458  | 194 | 179   | 1.08 | 24.6   | 0.1690 | 0.0021 | 9.1242  | 0.2631 | 0.3910 | 0.0110 | 0.9719 | 2548 | 20.83   | 2351 | 26.43 | 2127 | 50.79 | 19.8  |
| 17TH-09-01-38 | 333  | 266 | 339   | 0.79 | 1.54   | 0.0813 | 0.0012 | 1.9892  | 0.0576 | 0.1775 | 0.0054 | 1.0595 | 1229 | 29.93   | 1112 | 19.58 | 1053 | 29.82 | 16.7  |
| 17TH-09-01-44 | 199  | 364 | 355   | 1.02 | 3.89   | 0.1015 | 0.0014 | 2.7746  | 0.1077 | 0.1967 | 0.0063 | 0.8261 | 1654 | 24.54   | 1349 | 29.00 | 1157 | 33.99 | 42.9  |
| 17TH-09-01-46 | 236  | 166 | 91.8  | 1.80 | 10.00  | 0.0956 | 0.0016 | 3.0495  | 0.0750 | 0.2317 | 0.0054 | 0.9419 | 1543 | 31.64   | 1420 | 18.83 | 1343 | 28.11 | 14.8  |
| 17TH-09-01-49 | 311  | 190 | 166   | 1.15 | 1.42   | 0.1422 | 0.0016 | 6.8571  | 0.1733 | 0.3511 | 0.0099 | 1.1138 | 2254 | 19.29   | 2093 | 22.45 | 1940 | 47.18 | 16.2  |
| 17TH-09-01-50 | 591  | 518 | 327   | 1.58 | 27.0   | 0.1817 | 0.0018 | 7.5806  | 0.2388 | 0.3029 | 0.0094 | 0.9851 | 2668 | 15.28   | 2183 | 28.29 | 1706 | 46.51 | 56.4  |
| 17TH-09-01-53 | 193  | 248 | 139   | 1.78 | 0.0000 | 0.0897 | 0.0015 | 2.4287  | 0.0760 | 0.1959 | 0.0048 | 0.7833 | 1420 | 31.17   | 1251 | 22.52 | 1153 | 25.89 | 23.1  |
| 17TH-09-01-54 | 266  | 269 | 188   | 1.43 | 3.62   | 0.0956 | 0.0011 | 2.8453  | 0.0709 | 0.2165 | 0.0056 | 1.0429 | 1540 | 21.61   | 1368 | 18.74 | 1263 | 29.82 | 21.9  |
| 17TH-09-01-56 | 268  | 218 | 151   | 1.44 | 19.5   | 0.1055 | 0.0031 | 3.1254  | 0.0832 | 0.2158 | 0.0033 | 0.5664 | 1724 | 49.54   | 1439 | 20.50 | 1259 | 17.26 | 36.9  |
| 17TH-09-01-60 | 472  | 464 | 198   | 2.35 | 0.00   | 0.0808 | 0.0009 | 1.9707  | 0.0338 | 0.1770 | 0.0025 | 0.8148 | 1217 | 22.22   | 1106 | 11.58 | 1050 | 13.56 | 15.8  |
| 17TH-09-01-61 | 226  | 278 | 319   | 0.87 | 6.88   | 0.0748 | 0.0013 | 1.4997  | 0.0399 | 0.1452 | 0.0029 | 0.7550 | 1065 | 33.33   | 930  | 16.24 | 874  | 16.44 | 21.8  |
| 17TH-09-01-63 | 294  | 289 | 158   | 1.83 | 37.5   | 0.0893 | 0.0019 | 2.5916  | 0.0486 | 0.2107 | 0.0042 | 1.0519 | 1411 | 41.52   | 1298 | 13.76 | 1233 | 22.13 | 14.5  |
| 17TH-09-01-65 | 203  | 143 | 98.6  | 1.45 | 31.9   | 0.0920 | 0.0025 | 2.4744  | 0.0822 | 0.1944 | 0.0030 | 0.4598 | 1533 | 51.85   | 1265 | 24.04 | 1145 | 16.04 | 33.9  |
| 17TH-09-01-66 | 173  | 386 | 150   | 2.57 | 35.7   | 0.1075 | 0.0053 | 1.9511  | 0.0718 | 0.1332 | 0.0032 | 0.6502 | 1767 | 89.67   | 1099 | 24.71 | 806  | 18.13 | 119.2 |
| 17TH-09-01-70 | 414  | 319 | 274   | 1.16 | 13.7   | 0.1239 | 0.0027 | 3.5497  | 0.1018 | 0.2073 | 0.0041 | 0.6914 | 2013 | 37.50   | 1538 | 22.75 | 1215 | 21.97 | 65.7  |
| 17TH-09-01-72 | 359  | 387 | 353   | 1.10 | 39.5   | 0.1080 | 0.0029 | 2.1071  | 0.0544 | 0.1428 | 0.0051 | 1.3748 | 1766 | 48.92   | 1151 | 17.79 | 861  | 28.59 | 105.2 |
| 17TH-09-01-74 | 37.6 | 124 | 156   | 0.80 | 0.0000 | 0.0557 | 0.0019 | 0.3002  | 0.0132 | 0.0389 | 0.0008 | 0.4437 | 443  | 75.92   | 267  | 10.32 | 246  | 4.71  | 80.1  |
| 17TH-09-01-77 | 399  | 269 | 200   | 1.34 | 10.25  | 0.1012 | 0.0024 | 3.5441  | 0.0817 | 0.2551 | 0.0068 | 1.1623 | 1647 | -154.48 | 1537 | 18.29 | 1465 | 35.13 | 12.4  |
| 17TH-09-01-79 | 127  | 118 | 134   | 0.88 | 5.94   | 0.0841 | 0.0036 | 2.1005  | 0.1004 | 0.1806 | 0.0036 | 0.4177 | 1295 | 82.56   | 1149 | 32.89 | 1070 | 19.69 | 21.0  |
| 17TH-09-01-81 | 200  | 324 | 158   | 2.05 | 7.6    | 0.0795 | 0.0018 | 1.5141  | 0.0464 | 0.1387 | 0.0058 | 1.3611 | 1185 | 44.44   | 936  | 18.74 | 837  | 32.74 | 41.5  |
| 17TH-09-01-82 | 286  | 248 | 231   | 1.08 | 25.8   | 0.0945 | 0.0018 | 2.7900  | 0.0651 | 0.2144 | 0.0052 | 1.0486 | 1518 | 35.34   | 1353 | 17.46 | 1252 | 27.86 | 21.2  |
| 17TH-09-01-83 | 346  | 403 | 288   | 1.40 | 12.77  | 0.0962 | 0.0017 | 2.6210  | 0.0770 | 0.1976 | 0.0056 | 0.9653 | 1554 | 34.72   | 1307 | 21.62 | 1162 | 30.18 | 33.7  |
| 17TH-09-01-84 | 349  | 345 | 230   | 1.50 | 4.63   | 0.0848 | 0.0014 | 2.3209  | 0.0571 | 0.1983 | 0.0042 | 0.8543 | 1322 | 31.48   | 1219 | 17.48 | 1166 | 22.43 | 13.4  |
| 17TH-09-01-85 | 522  | 706 | 431   | 1.64 | 25.4   | 0.1087 | 0.0018 | 2.9936  | 0.0816 | 0.1997 | 0.0048 | 0.8898 | 1777 | 31.33   | 1406 | 20.77 | 1174 | 26.03 | 51.5  |
| 17TH-09-01-86 | 132  | 171 | 99.2  | 1.72 | 5.12   | 0.0793 | 0.0011 | 1.8728  | 0.0490 | 0.1717 | 0.0048 | 1.0737 | 1189 | 25.92   | 1072 | 17.34 | 1021 | 26.54 | 16.4  |
| 17TH-09-01-87 | 118  | 400 | 436   | 0.92 | 16.3   | 0.0574 | 0.0016 | 0.3040  | 0.0088 | 0.0386 | 0.0010 | 0.8869 | 506  | 61.11   | 269  | 6.87  | 244  | 6.16  | 107.3 |
| 17TH-09-01-88 | 269  | 174 | 156   | 1.11 | 11.2   | 0.1090 | 0.0021 | 3.9928  | 0.0859 | 0.2666 | 0.0062 | 1.0829 | 1783 | 34.88   | 1633 | 17.50 | 1523 | 31.60 | 17.1  |
| 17TH-09-01-91 | 378  | 543 | 354   | 1.53 | 4.39   | 0.1021 | 0.0012 | 2.4709  | 0.0898 | 0.1749 | 0.0058 | 0.9199 | 1662 | 20.53   | 1264 | 26.29 | 1039 | 32.09 | 59.9  |
| 17TH-09-01-92 | 210  | 200 | 127   | 1.58 | 0.10   | 0.0785 | 0.0015 | 1.7283  | 0.0351 | 0.1597 | 0.0026 | 0.7907 | 1161 | 37.04   | 1019 | 13.09 | 955  | 14.27 | 21.6  |
| 17TH-09-01-93 | 216  | 149 | 102.2 | 1.46 | 13.4   | 0.1014 | 0.0016 | 3.4275  | 0.0841 | 0.2444 | 0.0045 | 0.7556 | 1650 | 29.48   | 1511 | 19.31 | 1410 | 23.49 | 17.1  |
| 17TH-09-01-94 | 285  | 195 | 128   | 1.52 | 0.98   | 0.0999 | 0.0018 | 3.3731  | 0.1038 | 0.2450 | 0.0077 | 1.0236 | 1633 | 33.33   | 1498 | 24.12 | 1413 | 39.95 | 15.6  |
| 17TH-09-01-95 | 186  | 136 | 107   | 1.26 | 14.0   | 0.0892 | 0.0012 | 2.6594  | 0.0485 | 0.2159 | 0.0032 | 0.8235 | 1409 | 25.77   | 1317 | 13.48 | 1260 | 17.19 | 11.8  |

|                |      |      |      |      |        |        |        |         |        |        |        |        |      |       |      |       |      |       |       |
|----------------|------|------|------|------|--------|--------|--------|---------|--------|--------|--------|--------|------|-------|------|-------|------|-------|-------|
| 17TH-09-01-96  | 112  | 74.8 | 86.6 | 0.86 | 6.25   | 0.0868 | 0.0020 | 2.3878  | 0.0594 | 0.1995 | 0.0033 | 0.6691 | 1367 | 44.75 | 1239 | 17.82 | 1172 | 17.85 | 16.6  |
| 17TH-09-01-97  | 235  | 161  | 195  | 0.83 | 7.34   | 0.0880 | 0.0013 | 2.5113  | 0.0550 | 0.2071 | 0.0050 | 1.0969 | 1383 | 28.24 | 1275 | 15.92 | 1213 | 26.56 | 14.0  |
| 17TH-09-01-98  | 439  | 358  | 313  | 1.14 | 15.0   | 0.0800 | 0.0013 | 1.8704  | 0.0446 | 0.1698 | 0.0049 | 1.1988 | 1196 | 31.48 | 1071 | 15.80 | 1011 | 26.76 | 18.3  |
| 17TH-09-01-99  | 434  | 526  | 241  | 2.18 | 0.0000 | 0.0883 | 0.0017 | 2.1980  | 0.0813 | 0.1817 | 0.0073 | 1.0891 | 1391 | 38.12 | 1180 | 25.83 | 1076 | 39.93 | 29.2  |
| 17TH-09-01-100 | 33.6 | 110  | 185  | 0.59 | 0.0000 | 0.0531 | 0.0012 | 0.2653  | 0.0060 | 0.0363 | 0.0006 | 0.6979 | 332  | 51.85 | 239  | 4.79  | 230  | 3.55  | 44.2  |
| 17TH-09-01-101 | 107  | 134  | 133  | 1.01 | 3.35   | 0.0926 | 0.0017 | 2.0970  | 0.0377 | 0.1645 | 0.0031 | 1.0443 | 1481 | 29.47 | 1148 | 12.38 | 982  | 17.11 | 50.8  |
| 17TH-09-01-104 | 343  | 177  | 152  | 1.16 | 91.2   | 0.1898 | 0.0021 | 11.8358 | 0.1860 | 0.4541 | 0.0093 | 1.2993 | 2743 | 17.13 | 2591 | 14.82 | 2413 | 41.12 | 13.6  |
| 17TH-09-01-105 | 160  | 199  | 196  | 1.02 | 0.0000 | 0.0913 | 0.0013 | 2.8124  | 0.0423 | 0.2236 | 0.0024 | 0.7127 | 1454 | 27.01 | 1359 | 11.31 | 1301 | 12.66 | 11.7  |
| 17TH-09-01-106 | 253  | 184  | 198  | 0.93 | 27.2   | 0.1204 | 0.0016 | 4.3269  | 0.1328 | 0.2626 | 0.0089 | 1.1070 | 1962 | 22.99 | 1698 | 25.34 | 1503 | 45.57 | 30.5  |
| 17TH-09-01-107 | 158  | 168  | 97.5 | 1.72 | 0.0000 | 0.0782 | 0.0015 | 1.8902  | 0.0449 | 0.1754 | 0.0029 | 0.6935 | 1154 | 34.26 | 1078 | 15.81 | 1042 | 15.87 | 10.7  |
| 17TH-09-01-109 | 230  | 171  | 176  | 0.97 | 25.9   | 0.0971 | 0.0012 | 3.0094  | 0.0645 | 0.2251 | 0.0055 | 1.1448 | 1569 | 24.07 | 1410 | 16.35 | 1309 | 29.06 | 19.9  |
| 17TH-09-01-110 | 393  | 130  | 234  | 0.56 | 29.5   | 0.2878 | 0.0028 | 20.2119 | 0.3525 | 0.5091 | 0.0081 | 0.9101 | 3406 | 14.94 | 3102 | 17.01 | 2653 | 34.55 | 28.4  |
| 17TH-09-01-111 | 273  | 182  | 207  | 0.88 | 88.5   | 0.1169 | 0.0025 | 4.7039  | 0.0832 | 0.2923 | 0.0041 | 0.7953 | 1909 | 37.19 | 1768 | 14.86 | 1653 | 20.53 | 15.5  |
| 17TH-09-01-112 | 378  | 708  | 901  | 0.79 | 96.9   | 0.0819 | 0.0017 | 1.0765  | 0.0811 | 0.0933 | 0.0051 | 0.7277 | 1243 | 8.34  | 742  | 39.66 | 575  | 30.17 | 116.0 |
| 17TH-09-01-113 | 146  | 536  | 522  | 1.03 | 0.0000 | 0.0854 | 0.0016 | 1.4500  | 0.0302 | 0.1233 | 0.0020 | 0.7949 | 1325 | 36.27 | 910  | 12.53 | 750  | 11.72 | 76.7  |
| 17TH-09-01-116 | 166  | 132  | 89.0 | 1.48 | 16.7   | 0.1072 | 0.0018 | 3.6801  | 0.0560 | 0.2498 | 0.0036 | 0.9594 | 1754 | 30.87 | 1567 | 12.20 | 1438 | 18.84 | 22.0  |
| 17TH-09-01-117 | 183  | 143  | 164  | 0.87 | 6.75   | 0.0949 | 0.0015 | 2.9449  | 0.0648 | 0.2255 | 0.0046 | 0.9223 | 1526 | 28.24 | 1394 | 16.70 | 1311 | 24.08 | 16.4  |
| 17TH-09-01-118 | 188  | 186  | 130  | 1.43 | 5.27   | 0.0822 | 0.0021 | 2.0115  | 0.0503 | 0.1776 | 0.0026 | 0.5746 | 1251 | 16.51 | 1119 | 16.98 | 1054 | 13.99 | 18.7  |
| 17TH-09-01-121 | 225  | 282  | 261  | 1.08 | 69.2   | 0.0918 | 0.0015 | 2.5111  | 0.0876 | 0.1981 | 0.0054 | 0.7820 | 1463 | 31.48 | 1275 | 25.34 | 1165 | 29.08 | 25.5  |
| 17TH-09-01-122 | 129  | 82.1 | 410  | 0.20 | 0.0000 | 0.0810 | 0.0010 | 1.9376  | 0.0387 | 0.1731 | 0.0021 | 0.6102 | 1233 | 24.53 | 1094 | 13.39 | 1029 | 11.61 | 19.8  |
| 17TH-09-01-124 | 160  | 97.5 | 311  | 0.31 | 37.6   | 0.1034 | 0.0012 | 3.4247  | 0.0530 | 0.2404 | 0.0035 | 0.9425 | 1687 | 21.15 | 1510 | 12.22 | 1389 | 18.26 | 21.5  |
| 17TH-09-01-125 | 299  | 422  | 260  | 1.62 | 63.7   | 0.0802 | 0.0011 | 1.9410  | 0.0379 | 0.1755 | 0.0026 | 0.7600 | 1267 | 27.78 | 1095 | 13.12 | 1042 | 14.31 | 21.5  |
| 17TH-09-01-127 | 125  | 95.2 | 110  | 0.86 | 20.7   | 0.1028 | 0.0014 | 3.0611  | 0.0693 | 0.2156 | 0.0034 | 0.6883 | 1676 | 25.77 | 1423 | 17.36 | 1259 | 17.83 | 33.1  |
| 17TH-09-01-129 | 121  | 84.4 | 81.2 | 1.04 | 0.58   | 0.0967 | 0.0016 | 3.0449  | 0.0486 | 0.2287 | 0.0032 | 0.8643 | 1561 | 30.09 | 1419 | 12.25 | 1328 | 16.59 | 17.6  |
| 17TH-09-01-133 | 411  | 444  | 608  | 0.73 | 40.9   | 0.0902 | 0.0011 | 2.0583  | 0.1357 | 0.1647 | 0.0105 | 0.9650 | 1431 | 23.77 | 1135 | 45.06 | 983  | 58.00 | 45.6  |
| 17TH-09-01-134 | 398  | 505  | 220  | 2.29 | 34.6   | 0.0923 | 0.0013 | 2.4682  | 0.0856 | 0.1934 | 0.0057 | 0.8445 | 1474 | 23.15 | 1263 | 25.07 | 1140 | 30.59 | 29.3  |
| 17TH-09-01-136 | 181  | 210  | 104  | 2.02 | 135    | 0.1342 | 0.0070 | 4.1147  | 0.2298 | 0.2230 | 0.0068 | 0.5500 | 2154 | 90.59 | 1657 | 45.64 | 1297 | 36.11 | 66.0  |
| 17TH-09-01-137 | 467  | 423  | 236  | 1.79 | 42.9   | 0.0976 | 0.0026 | 3.0738  | 0.1313 | 0.2251 | 0.0040 | 0.4140 | 1589 | 49.84 | 1426 | 32.74 | 1309 | 20.95 | 21.4  |
| 17TH-09-01-139 | 589  | 668  | 647  | 1.03 | 16.8   | 0.0998 | 0.0012 | 2.6470  | 0.2057 | 0.1908 | 0.0141 | 0.9497 | 1620 | 22.22 | 1314 | 57.28 | 1126 | 76.24 | 43.9  |
| 17TH-09-01-48  | 103  | 390  | 291  | 1.34 | 5.01   | 0.0508 | 0.0010 | 0.2453  | 0.0054 | 0.0351 | 0.0006 | 0.8182 | 232  | 46.29 | 223  | 4.43  | 222  | 3.96  | 4.1   |
