# Supplementary material
Source: publisher figshare collection journal article supplement (https://tandf.figshare.com/articles/dataset/_/12854117)
Supplement: Supplementary file 2 [file 1]

**Supplementary Table 3.** Trace element data of zircons from the Qiaotou Formation and recognition of the provenance of detrital zircons based on classification trees after Belousova et al.

|             | (2002)                  |       |      |      |      |       |      |      |     |       |      |       |      |     |       |       |      |       |     |     |      |
|-------------|-------------------------|-------|------|------|------|-------|------|------|-----|-------|------|-------|------|-----|-------|-------|------|-------|-----|-----|------|
|             | Nb                      | La    | Ce   | Pr   | Nd   | Sm    | Eu   | Gd   | Tb  | Dy    | Ho   | Er    | Tm   | Yb  | Lu    | Hf    | Ta   | Pb    | Th  | U   | U    |
|             | 93                      | 139   | 140  | 141  | 146  | 147   | 153  | 157  | 159 | 163   | 165  | 166   | 169  | 172 | 175   | 178   | 181  | Total | 232 | 238 | 232  |
|             | Belousova et al. (2002) |       |      |      |      |       |      |      |     |       |      |       |      |     |       |       |      |       |     |     |      |
| 17DL02-1-01 | 1.47                    | 0.013 | 15.1 | 0.05 | 1.17 | 2.30  | 0.32 | 16.4 | 4.8 | 62.3  | 22.2 | 102.7 | 22.3 | 231 | 36.2  | 8855  | 0.93 | 217   | 123 | 134 | 3108 |
| 17DL02-1-02 | 1.31                    | 0.086 | 9.8  | 0.08 | 0.98 | 2.03  | 0.37 | 13.6 | 4.5 | 57.3  | 21.1 | 97.9  | 20.6 | 220 | 34.5  | 8870  | 0.80 | 185   | 99  | 145 | 2505 |
| 17DL02-1-03 | 0.83                    | 0.000 | 22.1 | 0.12 | 1.46 | 4.07  | 1.05 | 21.8 | 8.0 | 99.1  | 39.1 | 201.4 | 47.6 | 566 | 106.0 | 10277 | 0.81 | 381   | 289 | 268 | 7316 |
| 17DL02-1-04 | 5.76                    | 0.002 | 29.6 | 0.01 | 0.72 | 2.09  | 0.21 | 14.3 | 5.5 | 78.0  | 29.8 | 150.3 | 33.8 | 381 | 61.6  | 10244 | 2.83 | 439   | 249 | 340 | 6319 |
| 17DL02-1-05 | 0.14                    | 0.035 | 11.4 | 0.08 | 0.95 | 1.37  | 0.58 | 4.5  | 0.9 | 10.5  | 3.3  | 14.0  | 3.0  | 34  | 5.5   | 9220  | 0.04 | 235   | 231 | 84  | 5854 |
| 17DL02-1-06 | 1.28                    | 0.006 | 19.4 | 0.06 | 1.18 | 2.39  | 0.62 | 13.3 | 3.9 | 47.1  | 16.2 | 77.4  | 15.8 | 175 | 29.3  | 8514  | 0.51 | 161   | 98  | 89  | 2475 |
| 17DL02-1-07 | 2.89                    | 0.000 | 13.8 | 0.08 | 1.51 | 2.69  | 0.35 | 16.6 | 5.8 | 72.7  | 26.1 | 119.7 | 25.0 | 267 | 42.1  | 9439  | 1.34 | 120   | 96  | 107 | 2428 |
| 17DL02-1-08 | 0.75                    | 0.018 | 10.4 | 0.04 | 0.82 | 2.62  | 0.40 | 15.6 | 6.0 | 83.4  | 33.1 | 160.1 | 35.5 | 384 | 64.3  | 10023 | 0.70 | 133   | 79  | 86  | 1994 |
| 17DL02-1-09 | 2.81                    | 0.018 | 17.6 | 0.07 | 1.33 | 2.66  | 0.42 | 16.8 | 6.0 | 75.0  | 28.2 | 132.1 | 29.3 | 305 | 50.4  | 9423  | 1.26 | 156   | 135 | 116 | 3432 |
| 17DL02-1-10 | 1.31                    | 0.023 | 9.0  | 0.04 | 0.85 | 2.01  | 0.21 | 11.7 | 3.8 | 48.5  | 17.9 | 88.7  | 18.6 | 215 | 39.8  | 10092 | 1.00 | 457   | 152 | 583 | 3843 |
| 17DL02-1-11 | 2.72                    | 0.026 | 14.0 | 0.05 | 0.85 | 2.16  | 0.08 | 14.9 | 5.0 | 64.5  | 24.7 | 115.6 | 24.1 | 249 | 40.3  | 10022 | 1.52 | 410   | 207 | 299 | 5237 |
| 17DL02-1-12 | 3.07                    | 0.566 | 22.3 | 0.20 | 1.55 | 2.57  | 0.45 | 20.1 | 7.5 | 105.1 | 40.2 | 197.1 | 43.5 | 466 | 76.6  | 9839  | 1.25 | 239   | 144 | 203 | 3639 |
| 17DL02-1-13 | 5.20                    | 0.056 | 19.1 | 0.06 | 1.10 | 2.94  | 0.18 | 17.5 | 6.5 | 85.5  | 33.1 | 160.6 | 34.7 | 367 | 57.9  | 10273 | 2.91 | 456   | 332 | 556 | 8405 |
| 17DL02-1-14 | 2.07                    | 0.087 | 17.1 | 0.06 | 0.93 | 1.71  | 0.29 | 12.6 | 4.2 | 59.3  | 21.6 | 107.7 | 22.7 | 245 | 40.9  | 9253  | 1.06 | 196   | 106 | 131 | 2683 |
| 17DL02-1-15 | 1.14                    | 0.016 | 11.4 | 0.10 | 1.52 | 3.55  | 0.36 | 16.0 | 5.2 | 64.0  | 21.9 | 100.8 | 20.6 | 222 | 35.9  | 8431  | 0.63 | 238   | 120 | 129 | 3028 |
| 17DL02-1-16 | 2.83                    | 0.010 | 43.8 | 0.05 | 1.34 | 2.91  | 0.48 | 14.4 | 5.5 | 69.6  | 26.6 | 134.7 | 30.6 | 346 | 55.5  | 9355  | 1.46 | 194   | 173 | 118 | 4393 |
| 17DL02-1-17 | 0.97                    | 0.010 | 6.6  | 0.05 | 0.97 | 2.04  | 0.20 | 14.0 | 5.3 | 71.7  | 27.3 | 130.3 | 27.9 | 302 | 49.9  | 9533  | 0.58 | 107   | 61  | 76  | 1540 |
| 17DL02-1-18 | 3.71                    | 0.163 | 29.2 | 0.09 | 0.94 | 2.48  | 0.41 | 16.6 | 5.9 | 83.7  | 32.1 | 161.0 | 35.2 | 383 | 62.8  | 9960  | 2.27 | 317   | 177 | 237 | 4477 |
| 17DL02-1-19 | 2.49                    | 0.106 | 26.7 | 0.09 | 0.96 | 2.35  | 0.53 | 15.5 | 5.8 | 82.6  | 29.7 | 147.4 | 32.9 | 353 | 56.4  | 9620  | 1.20 | 194   | 128 | 124 | 3247 |
| 17DL02-1-21 | 0.77                    | 0.000 | 3.7  | 0.02 | 0.62 | 1.83  | 0.10 | 11.5 | 3.9 | 54.9  | 21.6 | 106.4 | 23.5 | 257 | 44.3  | 11395 | 0.65 | 149   | 56  | 183 | 1411 |
| 17DL02-1-22 | 1.14                    | 0.000 | 3.8  | 0.13 | 2.18 | 4.92  | 0.73 | 18.3 | 4.2 | 38.2  | 11.4 | 46.7  | 8.7  | 85  | 13.3  | 8462  | 0.42 | 408   | 175 | 266 | 4439 |
| 17DL02-1-23 | 2.90                    | 0.028 | 30.3 | 0.05 | 0.96 | 2.12  | 0.40 | 14.1 | 4.6 | 67.2  | 25.2 | 122.9 | 27.1 | 299 | 50.5  | 10268 | 1.54 | 224   | 196 | 162 | 4959 |
| 17DL02-1-24 | 0.74                    | 0.000 | 3.9  | 0.03 | 0.55 | 2.14  | 0.29 | 14.8 | 6.6 | 108.0 | 45.5 | 251.9 | 61.6 | 707 | 122.0 | 11041 | 1.13 | 123   | 43  | 164 | 1089 |
| 17DL02-1-25 | 1.88                    | 0.043 | 11.0 | 0.05 | 0.80 | 1.44  | 0.26 | 6.6  | 2.3 | 34.1  | 13.8 | 71.4  | 17.6 | 204 | 35.4  | 12059 | 1.78 | 235   | 172 | 343 | 4344 |
| 17DL02-1-26 | 5.16                    | 0.000 | 13.4 | 0.07 | 1.82 | 3.97  | 0.16 | 23.7 | 7.9 | 98.0  | 35.3 | 165.0 | 33.4 | 326 | 51.2  | 10996 | 2.28 | 394   | 276 | 206 | 6984 |
| 17DL02-1-27 | 1.36                    | 0.000 | 10.8 | 0.02 | 0.76 | 2.70  | 1.13 | 16.8 | 5.6 | 66.5  | 23.2 | 109.5 | 23.1 | 241 | 40.4  | 11186 | 0.92 | 261   | 124 | 280 | 3150 |
| 17DL02-1-28 | 1.06                    | 0.000 | 1.4  | 0.02 | 0.38 | 1.84  | 0.11 | 19.0 | 8.6 | 120.5 | 43.1 | 196.5 | 38.9 | 381 | 57.7  | 11767 | 1.11 | 304   | 79  | 605 | 1999 |
| 17DL02-1-29 | 4.29                    | 0.023 | 19.9 | 0.02 | 0.98 | 2.05  | 0.15 | 12.6 | 5.0 | 68.2  | 26.1 | 127.1 | 29.2 | 311 | 52.5  | 11046 | 2.09 | 318   | 253 | 341 | 6398 |
| 17DL02-1-30 | 2.88                    | 0.016 | 28.0 | 0.04 | 0.60 | 1.08  | 0.12 | 8.7  | 3.5 | 49.6  | 19.6 | 99.3  | 22.9 | 250 | 44.2  | 10476 | 1.35 | 186   | 109 | 128 | 2749 |
| 17DL02-1-31 | 17.57                   | 0.000 | 15.6 | 0.06 | 1.40 | 2.99  | 0.37 | 22.2 | 8.2 | 121.5 | 46.4 | 230.5 | 48.3 | 502 | 78.1  | 11449 | 8.56 | 710   | 354 | 583 | 8970 |
| 17DL02-1-32 | 0.76                    | 0.089 | 27.1 | 0.53 | 9.55 | 11.67 | 1.90 | 38.9 | 9.9 | 101.5 | 32.5 | 137.5 | 27.2 | 278 | 44.0  | 8403  | 0.50 | 455   | 292 | 211 | 7395 |
| 17DL02-1-33 | 2.76                    | 0.000 | 33.7 | 0.04 | 1.30 | 2.74  | 0.35 | 18.7 | 6.8 | 91.8  | 35.8 | 181.1 | 38.8 | 421 | 69.0  | 10084 | 1.64 | 307   | 196 | 187 | 4971 |
| 17DL02-1-34 | 1.13                    | 0.019 | 0.6  | 0.00 | 0.68 | 2.26  | 0.14 | 12.7 | 2.9 | 22.3  | 4.4  | 13.8  | 2.0  | 16  | 2.2   | 11409 | 0.44 | 238   | 27  | 747 | 696  |
| 17DL02-1-35 | 0.22                    | 0.000 | 16.9 | 0.16 | 3.19 | 7.47  | 1.29 | 32.6 | 9.4 | 104.0 | 33.1 | 143.7 | 29.0 | 300 | 47.9  | 9611  | 0.18 | 303   | 235 | 148 | 5959 |
| 17DL02-1-36 | 6.45                    | 0.079 | 19.3 | 0.09 | 1.00 | 2.83  | 0.21 | 18.2 | 6.7 | 90.4  | 34.5 | 174.2 | 36.8 | 379 | 62.1  | 9835  | 2.75 | 313   | 174 | 262 | 4412 |
| 17DL02-1-37 | 3.82                    | 0.047 | 28.6 | 0.05 | 0.62 | 1.64  | 0.20 | 13.4 | 5.0 | 72.5  | 28.7 | 149.4 | 32.4 | 367 | 60.3  | 10722 | 2.04 | 358   | 204 | 274 | 5167 |

|             |       |       |      |      |      |       |      |      |      |       |      |       |      |     |       |       |      |     |     |     |       |                 |
|-------------|-------|-------|------|------|------|-------|------|------|------|-------|------|-------|------|-----|-------|-------|------|-----|-----|-----|-------|-----------------|
| 17DL02-1-38 | 1.59  | 0.026 | 14.7 | 0.06 | 0.87 | 2.47  | 0.33 | 17.6 | 7.2  | 101.7 | 40.3 | 204.4 | 45.0 | 501 | 81.7  | 10149 | 1.03 | 191 | 109 | 142 | 2755  | Dolerite        |
| 17DL02-1-39 | 2.51  | 0.003 | 12.3 | 0.07 | 1.72 | 3.88  | 0.42 | 16.9 | 6.4  | 75.6  | 26.5 | 124.3 | 26.5 | 285 | 43.7  | 9281  | 1.30 | 125 | 100 | 116 | 2543  | Dolerite        |
| 17DL02-1-40 | 2.45  | 0.022 | 29.7 | 0.05 | 1.17 | 2.65  | 0.66 | 16.0 | 5.5  | 72.7  | 28.8 | 142.7 | 31.9 | 361 | 61.1  | 9107  | 1.24 | 260 | 161 | 172 | 4072  | Dolerite        |
| 17DL02-1-41 | 1.17  | 0.047 | 6.1  | 0.02 | 0.84 | 2.53  | 0.11 | 18.8 | 7.2  | 96.5  | 38.9 | 184.8 | 37.7 | 410 | 64.4  | 9735  | 1.14 | 344 | 155 | 330 | 3936  | Dolerite        |
| 17DL02-1-42 | 3.44  | 0.000 | 0.5  | 0.00 | 0.00 | 0.04  | 0.05 | 0.9  | 1.0  | 22.5  | 12.0 | 74.6  | 18.1 | 210 | 34.1  | 10456 | 4.83 | 62  | 4   | 314 | 97    | Granitoid(<65%) |
| 17DL02-1-43 | 1.66  | 0.000 | 10.2 | 0.04 | 0.77 | 1.60  | 0.25 | 9.4  | 3.7  | 46.6  | 17.8 | 86.7  | 18.9 | 204 | 33.6  | 9782  | 1.05 | 103 | 81  | 110 | 2058  | Dolerite        |
| 17DL02-1-44 | 2.03  | 0.049 | 31.9 | 0.09 | 2.04 | 4.33  | 1.45 | 21.5 | 7.1  | 91.0  | 35.1 | 180.1 | 39.3 | 452 | 76.9  | 7368  | 0.71 | 153 | 95  | 82  | 2406  | basalt          |
| 17DL02-1-45 | 1.99  | 0.000 | 16.1 | 0.08 | 0.69 | 2.17  | 0.54 | 14.8 | 5.3  | 71.3  | 26.1 | 126.0 | 26.6 | 283 | 46.6  | 8803  | 0.91 | 159 | 95  | 95  | 2408  | Dolerite        |
| 17DL02-1-46 | 1.38  | 0.025 | 15.6 | 0.05 | 0.75 | 1.43  | 0.23 | 8.4  | 3.0  | 40.2  | 16.0 | 79.1  | 18.2 | 196 | 33.2  | 9256  | 0.90 | 65  | 59  | 61  | 1483  | Dolerite        |
| 17DL02-1-47 | 2.12  | 0.000 | 11.3 | 0.07 | 1.18 | 2.37  | 0.35 | 12.8 | 4.6  | 57.4  | 21.3 | 100.3 | 20.4 | 225 | 36.2  | 8755  | 1.03 | 98  | 79  | 87  | 2011  | Dolerite        |
| 17DL02-1-48 | 9.25  | 0.000 | 11.3 | 0.05 | 0.99 | 3.29  | 0.70 | 19.1 | 6.0  | 76.5  | 26.6 | 118.3 | 23.5 | 235 | 35.1  | 9101  | 3.37 | 156 | 93  | 141 | 2368  | Dolerite        |
| 17DL02-1-49 | 5.13  | 0.024 | 14.5 | 0.03 | 0.95 | 2.22  | 0.20 | 16.1 | 6.8  | 96.0  | 37.6 | 186.1 | 39.1 | 418 | 69.3  | 9439  | 2.20 | 284 | 156 | 215 | 3950  | Dolerite        |
| 17DL02-1-50 | 0.46  | 0.011 | 21.8 | 0.11 | 1.39 | 2.19  | 0.95 | 9.0  | 2.1  | 22.4  | 6.8  | 30.1  | 5.8  | 62  | 9.8   | 7110  | 0.30 | 172 | 154 | 88  | 3900  | carbonate       |
| 17DL02-1-51 | 1.34  | 0.032 | 6.4  | 0.02 | 0.68 | 1.51  | 0.31 | 10.7 | 3.7  | 48.8  | 18.8 | 88.6  | 18.2 | 195 | 32.2  | 8447  | 0.70 | 172 | 81  | 143 | 2043  | Dolerite        |
| 17DL02-1-52 | 1.38  | 0.032 | 3.0  | 0.09 | 1.88 | 5.04  | 0.90 | 32.1 | 12.0 | 171.0 | 64.7 | 309.4 | 65.0 | 674 | 107.2 | 9739  | 0.63 | 277 | 145 | 291 | 3663  | Dolerite        |
| 17DL02-1-53 | 2.23  | 0.000 | 12.0 | 0.06 | 1.17 | 2.37  | 0.12 | 11.1 | 4.1  | 48.9  | 18.0 | 88.4  | 18.1 | 188 | 30.0  | 9701  | 1.35 | 463 | 242 | 319 | 6123  | Dolerite        |
| 17DL02-1-54 | 1.04  | 0.483 | 22.1 | 0.17 | 1.40 | 2.38  | 0.53 | 11.5 | 3.8  | 51.9  | 20.4 | 104.8 | 24.0 | 280 | 48.6  | 8463  | 0.57 | 189 | 121 | 114 | 3060  | Dolerite        |
| 17DL02-1-55 | 1.49  | 0.010 | 27.1 | 0.04 | 0.90 | 2.56  | 0.50 | 14.5 | 4.8  | 63.0  | 23.9 | 121.5 | 26.0 | 298 | 50.8  | 9555  | 1.09 | 284 | 171 | 179 | 4333  | Dolerite        |
| 17DL02-1-56 | 5.25  | 0.021 | 67.0 | 0.23 | 4.64 | 7.83  | 2.43 | 37.3 | 11.1 | 132.2 | 48.1 | 229.5 | 47.2 | 500 | 80.9  | 6886  | 1.24 | 162 | 102 | 88  | 2577  | basalt          |
| 17DL02-1-57 | 1.14  | 0.147 | 20.0 | 0.68 | 9.90 | 11.42 | 1.00 | 43.4 | 11.9 | 124.4 | 40.5 | 172.8 | 32.4 | 313 | 45.0  | 8266  | 0.56 | 312 | 191 | 112 | 4847  | Dolerite        |
| 17DL02-1-58 | 2.16  | 0.014 | 12.9 | 0.06 | 1.16 | 2.09  | 0.25 | 12.9 | 4.3  | 56.3  | 20.2 | 98.2  | 21.2 | 227 | 36.1  | 9233  | 1.14 | 114 | 95  | 110 | 2411  | Dolerite        |
| 17DL02-1-59 | 1.67  | 0.012 | 11.8 | 0.04 | 0.82 | 2.08  | 0.24 | 12.6 | 4.4  | 60.1  | 22.1 | 105.7 | 22.0 | 231 | 36.7  | 9239  | 0.94 | 218 | 124 | 163 | 3136  | Dolerite        |
| 17DL02-1-60 | 0.95  | 0.000 | 4.2  | 0.03 | 0.33 | 0.65  | 0.05 | 3.6  | 1.5  | 21.3  | 8.1  | 44.4  | 10.2 | 136 | 25.3  | 9002  | 0.52 | 139 | 45  | 206 | 1137  | Dolerite        |
| 17DL02-1-61 | 2.13  | 0.079 | 17.3 | 0.44 | 6.58 | 10.05 | 2.30 | 57.9 | 17.7 | 215.0 | 76.7 | 355.0 | 71.1 | 741 | 118.1 | 7223  | 0.67 | 579 | 388 | 222 | 9828  | basalt          |
| 17DL02-1-62 | 0.55  | 0.055 | 3.3  | 0.28 | 4.24 | 7.39  | 2.31 | 48.0 | 16.5 | 212.7 | 76.9 | 347.6 | 69.1 | 686 | 106.3 | 7131  | 0.34 | 208 | 113 | 142 | 2871  | basalt          |
| 17DL02-1-63 | 3.43  | 0.021 | 32.2 | 0.05 | 0.73 | 1.94  | 0.40 | 12.3 | 4.6  | 59.3  | 23.6 | 115.2 | 25.9 | 286 | 48.4  | 9953  | 1.58 | 184 | 167 | 149 | 4224  | Dolerite        |
| 17DL02-1-64 | 0.65  | 0.002 | 3.7  | 0.07 | 1.21 | 3.29  | 0.36 | 25.3 | 9.5  | 129.9 | 49.7 | 236.9 | 49.8 | 513 | 82.3  | 10060 | 0.45 | 184 | 87  | 165 | 2200  | Dolerite        |
| 17DL02-1-65 | 1.91  | 0.000 | 11.1 | 0.02 | 0.45 | 1.59  | 0.11 | 9.9  | 3.6  | 47.7  | 18.1 | 89.1  | 19.1 | 201 | 32.6  | 9850  | 1.43 | 290 | 141 | 246 | 3569  | Dolerite        |
| 17DL02-1-66 | 2.46  | 0.007 | 46.5 | 0.08 | 1.03 | 2.94  | 0.57 | 14.6 | 5.0  | 62.5  | 22.8 | 113.1 | 24.9 | 279 | 45.1  | 9172  | 1.30 | 199 | 190 | 105 | 4816  | Dolerite        |
| 17DL02-1-67 | 0.98  | 0.035 | 11.3 | 0.05 | 0.46 | 1.66  | 0.40 | 11.6 | 3.9  | 51.4  | 20.6 | 100.4 | 21.4 | 233 | 39.4  | 9168  | 0.56 | 153 | 87  | 98  | 2209  | Dolerite        |
| 17DL02-1-68 | 1.18  | 0.015 | 10.0 | 0.05 | 0.90 | 1.91  | 0.15 | 11.0 | 3.1  | 41.1  | 14.5 | 70.1  | 14.7 | 155 | 25.0  | 9707  | 0.64 | 200 | 110 | 123 | 2781  | Dolerite        |
| 17DL02-1-69 | 1.89  | 0.043 | 10.8 | 0.04 | 1.10 | 2.29  | 0.36 | 12.4 | 4.3  | 55.3  | 20.5 | 93.5  | 19.8 | 215 | 34.9  | 9114  | 1.04 | 93  | 76  | 86  | 1917  | Dolerite        |
| 17DL02-1-70 | 11.99 | 3.249 | 36.4 | 1.00 | 5.25 | 3.13  | 0.17 | 14.6 | 5.5  | 77.0  | 31.4 | 173.7 | 42.5 | 488 | 79.8  | 11305 | 6.01 | 845 | 636 | 941 | 16109 | Granitoid(<65%) |
| 17DL02-1-71 | 0.73  | 0.027 | 2.6  | 0.10 | 2.10 | 5.05  | 0.29 | 31.1 | 11.3 | 137.9 | 49.7 | 227.1 | 46.1 | 467 | 72.3  | 9897  | 0.52 | 165 | 79  | 148 | 2009  | Dolerite        |
| 17DL02-1-72 | 1.87  | 0.008 | 12.2 | 0.06 | 0.69 | 2.42  | 0.19 | 15.8 | 4.9  | 66.4  | 24.9 | 119.7 | 24.6 | 260 | 44.0  | 10193 | 1.37 | 327 | 158 | 247 | 4005  | Granitoid(<65%) |
| 17DL02-1-73 | 1.77  | 0.000 | 23.1 | 0.06 | 0.92 | 2.22  | 0.32 | 12.9 | 5.0  | 67.7  | 27.1 | 136.3 | 30.2 | 323 | 55.9  | 10451 | 1.32 | 239 | 146 | 165 | 3695  | Granitoid(<65%) |
| 17DL02-1-74 | 1.50  | 0.000 | 18.0 | 0.05 | 0.36 | 1.32  | 0.15 | 8.6  | 3.0  | 39.5  | 15.9 | 79.8  | 18.1 | 212 | 35.3  | 9365  | 0.84 | 126 | 75  | 86  | 1909  | Dolerite        |
| 17DL02-1-75 | 5.24  | 0.000 | 45.6 | 0.14 | 2.04 | 5.60  | 0.62 | 33.0 | 11.1 | 152.2 | 55.7 | 276.7 | 61.1 | 654 | 101.6 | 9806  | 1.58 | 996 | 563 | 167 | 14251 | Dolerite        |
| 17DL02-1-76 | 4.17  | 0.000 | 38.8 | 0.06 | 0.94 | 3.21  | 0.45 | 17.1 | 6.7  | 90.4  | 36.4 | 185.4 | 42.4 | 459 | 77.6  | 9641  | 2.60 | 299 | 172 | 189 | 4345  | Dolerite        |
| 17DL02-1-77 | 5.67  | 0.000 | 21.0 | 0.07 | 0.85 | 2.42  | 0.48 | 13.7 | 5.3  | 72.8  | 27.8 | 143.6 | 32.8 | 381 | 66.9  | 10366 | 5.01 | 498 | 366 | 691 | 9258  | Granitoid(<65%) |
| 17DL02-1-78 | 2.88  | 0.034 | 55.2 | 0.07 | 2.04 | 4.09  | 1.67 | 21.1 | 7.7  | 102.2 | 38.7 | 191.1 | 42.2 | 474 | 81.1  | 8818  | 0.92 | 376 | 242 | 158 | 6131  | Dolerite        |
| 17DL02-1-79 | 4.44  | 0.000 | 24.1 | 0.04 | 0.76 | 1.61  | 0.21 | 12.7 | 5.0  | 72.8  | 29.8 | 155.1 | 36.5 | 404 | 70.6  | 10824 | 3.13 | 326 | 185 | 271 | 4690  | Granitoid(<65%) |

|             |       |       |      |      |       |       |       |      |      |       |       |       |       |      |       |       |      |      |      |     |       |                    |
|-------------|-------|-------|------|------|-------|-------|-------|------|------|-------|-------|-------|-------|------|-------|-------|------|------|------|-----|-------|--------------------|
| 17DL02-1-80 | 1.31  | 0.025 | 4.3  | 0.07 | 2.07  | 3.83  | 0.15  | 28.7 | 9.3  | 126.9 | 47.0  | 223.6 | 45.5  | 477  | 79.5  | 10302 | 0.74 | 144  | 63   | 100 | 1598  | Granitoid(<65%)    |
| 17DL02-1-81 | 1.44  | 0.013 | 11.3 | 0.01 | 0.45  | 2.03  | 0.34  | 12.5 | 4.4  | 58.8  | 21.7  | 105.7 | 22.7  | 251  | 45.3  | 9579  | 0.93 | 317  | 169  | 241 | 4273  | Dolerite           |
| 17DL02-1-82 | 2.44  | 0.000 | 11.6 | 0.08 | 1.05  | 2.32  | 0.40  | 13.2 | 4.6  | 58.5  | 20.8  | 99.0  | 20.7  | 228  | 36.9  | 9499  | 1.00 | 96   | 81   | 90  | 2051  | Dolerite           |
| 17DL02-1-83 | 2.78  | 0.008 | 24.1 | 0.03 | 0.53  | 1.81  | 0.40  | 13.5 | 5.1  | 69.5  | 27.2  | 137.6 | 29.4  | 328  | 56.4  | 10117 | 1.27 | 238  | 145  | 167 | 3661  | Dolerite           |
| 17DL02-1-84 | 4.20  | 0.018 | 52.7 | 0.08 | 1.61  | 3.61  | 0.61  | 20.2 | 6.5  | 85.6  | 32.7  | 165.2 | 36.8  | 402  | 70.7  | 10049 | 1.86 | 278  | 262  | 161 | 6641  | Dolerite           |
| 17DL02-1-85 | 2.13  | 0.015 | 11.6 | 0.05 | 0.82  | 1.55  | 0.26  | 10.3 | 3.7  | 46.5  | 17.5  | 85.0  | 18.3  | 200  | 33.3  | 9830  | 0.95 | 115  | 95   | 121 | 2403  | Dolerite           |
| 17DL02-1-86 | 4.33  | 0.181 | 14.5 | 0.20 | 1.22  | 1.81  | 0.14  | 10.0 | 3.9  | 52.0  | 20.7  | 102.5 | 23.2  | 250  | 41.7  | 8848  | 2.08 | 268  | 77   | 122 | 1947  | Dolerite           |
| 17DL02-1-87 | 2.67  | 0.000 | 16.3 | 0.03 | 0.78  | 1.63  | 0.31  | 9.2  | 3.3  | 43.3  | 16.9  | 84.0  | 18.0  | 201  | 34.6  | 10017 | 1.09 | 123  | 108  | 106 | 2747  | Dolerite           |
| 17DL02-1-88 | 0.18  | 0.004 | 2.5  | 0.08 | 1.39  | 3.85  | 0.31  | 27.2 | 9.4  | 115.0 | 38.9  | 169.3 | 31.6  | 306  | 48.2  | 10143 | 0.34 | 154  | 68   | 159 | 1721  | Dolerite           |
| 17DL02-1-89 | 0.93  | 0.000 | 26.7 | 0.11 | 1.89  | 3.14  | 0.83  | 14.5 | 4.3  | 42.0  | 14.9  | 66.6  | 13.6  | 142  | 23.7  | 7998  | 0.38 | 191  | 111  | 96  | 2822  | basalt             |
| 17DL02-1-90 | 0.64  | 0.025 | 17.0 | 0.25 | 3.51  | 6.56  | 1.17  | 33.3 | 10.3 | 122.0 | 43.9  | 189.7 | 37.9  | 376  | 60.3  | 9644  | 0.53 | 272  | 168  | 145 | 4266  | Dolerite           |
| 17DL02-1-91 | 2.78  | 0.000 | 7.9  | 0.04 | 0.95  | 2.59  | 0.09  | 20.8 | 7.7  | 112.9 | 44.7  | 218.3 | 45.5  | 473  | 76.0  | 10752 | 1.86 | 442  | 230  | 392 | 5834  | Granitoid(<65%)    |
| 17DL02-1-92 | 2.17  | 0.026 | 18.2 | 0.25 | 4.49  | 7.64  | 0.68  | 38.5 | 12.7 | 154.1 | 54.4  | 244.4 | 47.3  | 485  | 78.7  | 10362 | 2.06 | 539  | 325  | 348 | 8230  | Granitoid(<65%)    |
| 17DL02-1-93 | 15.14 | 0.024 | 39.2 | 0.48 | 9.07  | 16.37 | 0.41  | 95.8 | 31.6 | 406.0 | 149.9 | 671.2 | 128.8 | 1285 | 197.7 | 9218  | 5.10 | 1751 | 1156 | 842 | 29284 | syenite/monzonite  |
| 17DL02-1-94 | 3.91  | 0.029 | 27.5 | 0.05 | 0.70  | 1.95  | 0.30  | 17.0 | 6.7  | 96.5  | 40.7  | 208.8 | 45.5  | 508  | 90.2  | 11647 | 2.43 | 288  | 167  | 242 | 4228  | Granitoid(<70-75%) |
| 17DL02-1-95 | 2.27  | 0.010 | 25.9 | 0.08 | 1.76  | 3.42  | 0.83  | 17.5 | 5.1  | 60.9  | 20.9  | 97.3  | 19.3  | 204  | 34.4  | 9909  | 0.72 | 257  | 119  | 204 | 3012  | Dolerite           |
| 17DL03-1-01 | 4.70  | 0.000 | 24.6 | 0.06 | 1.13  | 2.98  | 0.38  | 19.7 | 6.9  | 92.3  | 35.0  | 170.4 | 34.2  | 374  | 59.8  | 8294  | 1.64 | 146  | 73   | 151 | 1891  | Dolerite           |
| 17DL03-1-02 | 1.18  | 0.020 | 26.3 | 0.04 | 0.73  | 1.46  | 0.35  | 7.2  | 2.4  | 29.2  | 10.3  | 51.0  | 11.2  | 126  | 21.6  | 8619  | 0.55 | 141  | 103  | 151 | 2658  | Dolerite           |
| 17DL03-1-03 | 5.12  | 0.000 | 16.5 | 0.05 | 0.94  | 2.87  | 0.26  | 20.2 | 7.9  | 104.8 | 41.9  | 206.0 | 43.2  | 447  | 70.3  | 9463  | 2.90 | 394  | 242  | 439 | 6275  | Dolerite           |
| 17DL03-1-04 | 5.12  | 0.006 | 9.9  | 0.07 | 1.47  | 4.28  | 0.15  | 24.1 | 9.0  | 114.8 | 43.0  | 210.8 | 44.1  | 470  | 76.1  | 7976  | 1.76 | 375  | 173  | 316 | 4466  | basalt             |
| 17DL03-1-05 | 1.50  | 0.004 | 29.9 | 0.04 | 1.25  | 2.44  | 0.51  | 13.4 | 4.4  | 53.8  | 19.4  | 92.5  | 19.4  | 208  | 34.1  | 8923  | 0.67 | 151  | 101  | 64  | 2612  | Dolerite           |
| 17DL03-1-06 | 0.70  | 0.007 | 16.3 | 0.05 | 0.82  | 1.75  | 0.20  | 10.2 | 3.3  | 39.0  | 13.6  | 62.2  | 12.3  | 130  | 20.7  | 9397  | 0.20 | 322  | 139  | 53  | 3602  | carbonate          |
| 17DL03-1-07 | 9.11  | 0.624 | 56.3 | 2.46 | 28.01 | 30.75 | 15.43 | 91.4 | 27.2 | 297.0 | 94.6  | 420.7 | 84.2  | 858  | 118.1 | 5587  | 1.48 | 2231 | 2051 | 784 | 53104 | basalt             |
| 17DL03-1-08 | 1.99  | 0.023 | 11.3 | 0.06 | 1.38  | 2.36  | 0.40  | 13.5 | 4.7  | 60.0  | 22.8  | 107.5 | 22.8  | 244  | 39.7  | 8634  | 0.71 | 79   | 44   | 101 | 1142  | Dolerite           |
| 17DL03-1-09 | 0.62  | 0.024 | 6.8  | 0.09 | 1.41  | 3.05  | 0.46  | 19.1 | 6.3  | 83.5  | 30.7  | 146.0 | 30.2  | 330  | 52.6  | 9109  | 0.41 | 161  | 90   | 105 | 2339  | Dolerite           |
| 17DL03-1-10 | 4.11  | 0.000 | 25.0 | 0.06 | 1.43  | 3.88  | 0.68  | 22.1 | 7.8  | 97.6  | 37.4  | 176.4 | 35.5  | 382  | 61.4  | 8621  | 1.36 | 140  | 72   | 130 | 1855  | Dolerite           |
| 17DL03-1-11 | 4.69  | 0.009 | 44.4 | 0.02 | 0.90  | 2.31  | 0.28  | 14.5 | 6.3  | 90.8  | 36.7  | 190.1 | 38.7  | 391  | 61.4  | 9436  | 2.32 | 923  | 346  | 311 | 8970  | Dolerite           |
| 17DL03-1-12 | 0.39  | 0.020 | 8.6  | 0.20 | 3.49  | 6.33  | 1.32  | 36.8 | 11.3 | 137.1 | 48.5  | 215.6 | 42.8  | 431  | 70.0  | 8563  | 0.32 | 153  | 53   | 47  | 1367  | Dolerite           |
| 17DL03-1-13 | 11.45 | 0.011 | 47.4 | 0.37 | 6.31  | 14.21 | 0.25  | 86.9 | 30.3 | 376.2 | 135.1 | 602.3 | 115.6 | 1138 | 173.6 | 7701  | 2.71 | 1147 | 592  | 534 | 15331 | basalt             |
| 17DL03-1-14 | 1.14  | 0.028 | 3.5  | 0.25 | 3.95  | 8.65  | 0.69  | 50.3 | 16.8 | 210.0 | 71.9  | 322.9 | 63.6  | 646  | 101.4 | 9319  | 0.58 | 131  | 105  | 122 | 2723  | Dolerite           |
| 17DL03-1-15 | 2.28  | 0.015 | 42.4 | 0.22 | 3.71  | 6.05  | 2.10  | 27.4 | 8.7  | 102.9 | 36.6  | 183.1 | 39.9  | 450  | 77.5  | 9912  | 1.24 | 387  | 261  | 228 | 6754  | Dolerite           |
| 17DL03-1-16 | 1.30  | 0.000 | 30.1 | 0.05 | 1.29  | 2.64  | 0.55  | 14.2 | 5.2  | 65.6  | 25.1  | 121.8 | 26.5  | 286  | 48.0  | 9877  | 0.78 | 704  | 214  | 160 | 5550  | Dolerite           |
| 17DL03-1-17 | 3.46  | 0.000 | 18.3 | 0.06 | 1.38  | 3.35  | 0.31  | 17.9 | 6.6  | 82.0  | 31.0  | 150.0 | 31.1  | 343  | 55.1  | 9484  | 1.49 | 197  | 119  | 247 | 3076  | Dolerite           |
| 17DL03-1-18 | 2.11  | 0.010 | 10.3 | 0.05 | 0.86  | 2.23  | 0.28  | 14.6 | 5.2  | 74.1  | 28.5  | 146.1 | 31.0  | 343  | 56.5  | 9462  | 1.14 | 139  | 86   | 137 | 2219  | Dolerite           |
| 17DL03-1-19 | 2.28  | 0.000 | 27.6 | 0.10 | 1.74  | 3.03  | 0.53  | 15.8 | 5.4  | 67.2  | 25.0  | 112.9 | 22.8  | 233  | 37.9  | 9905  | 0.84 | 446  | 185  | 111 | 4780  | Dolerite           |
| 17DL03-1-20 | 10.34 | 0.006 | 15.9 | 0.15 | 2.83  | 7.05  | 0.20  | 38.9 | 15.8 | 216.2 | 82.0  | 418.1 | 88.9  | 916  | 138.6 | 9541  | 4.41 | 272  | 219  | 422 | 5662  | Dolerite           |
| 17DL03-1-21 | 1.80  | 0.004 | 20.5 | 0.05 | 0.92  | 1.65  | 0.46  | 9.7  | 3.4  | 41.6  | 16.2  | 81.6  | 17.9  | 208  | 36.5  | 9324  | 1.01 | 208  | 96   | 195 | 2487  | Dolerite           |
| 17DL03-1-22 | 0.46  | 0.029 | 26.8 | 0.43 | 6.56  | 9.12  | 1.99  | 31.1 | 8.7  | 90.6  | 30.1  | 133.9 | 26.7  | 277  | 46.3  | 8824  | 0.27 | 288  | 212  | 111 | 5487  | Dolerite           |
| 17DL03-1-23 | 0.25  | 0.013 | 10.4 | 0.10 | 1.32  | 1.74  | 0.87  | 6.5  | 1.8  | 21.6  | 7.7   | 39.8  | 9.4   | 119  | 22.5  | 9651  | 0.16 | 88   | 55   | 80  | 1434  | Dolerite           |
| 17DL03-1-24 | 1.68  | 0.570 | 15.9 | 1.15 | 14.68 | 18.54 | 0.41  | 68.5 | 18.6 | 203.3 | 65.0  | 269.2 | 47.6  | 447  | 65.2  | 9709  | 0.56 | 399  | 268  | 98  | 6948  | Dolerite           |
| 17DL03-1-25 | 0.83  | 0.107 | 1.8  | 0.29 | 4.31  | 9.33  | 0.26  | 61.6 | 19.6 | 229.1 | 77.0  | 333.8 | 61.3  | 591  | 91.4  | 9566  | 0.42 | 144  | 101  | 224 | 2616  | Dolerite           |

|             |        |       |       |      |       |       |      |      |      |       |       |       |       |      |       |       |       |      |      |      |       |                    |
|-------------|--------|-------|-------|------|-------|-------|------|------|------|-------|-------|-------|-------|------|-------|-------|-------|------|------|------|-------|--------------------|
| 17DL03-1-26 | 4.13   | 0.010 | 10.0  | 0.05 | 0.85  | 1.75  | 0.04 | 7.6  | 3.3  | 42.1  | 15.9  | 82.8  | 19.2  | 223  | 37.1  | 10203 | 2.50  | 242  | 129  | 448  | 3343  | Granitoid(<65%)    |
| 17DL03-1-27 | 0.69   | 0.019 | 22.7  | 0.23 | 4.06  | 8.02  | 2.39 | 37.3 | 11.4 | 134.6 | 47.7  | 222.9 | 46.3  | 498  | 83.3  | 8657  | 0.23  | 184  | 140  | 75   | 3635  | Dolerite           |
| 17DL03-1-28 | 2.67   | 0.000 | 10.1  | 0.03 | 1.21  | 3.11  | 0.33 | 18.8 | 6.4  | 82.8  | 31.3  | 146.2 | 29.9  | 311  | 51.1  | 9024  | 0.90  | 112  | 71   | 106  | 1833  | Dolerite           |
| 17DL03-1-29 | 0.89   | 0.005 | 11.5  | 0.06 | 1.08  | 2.08  | 0.31 | 12.0 | 4.2  | 53.4  | 20.1  | 97.8  | 20.1  | 211  | 35.7  | 9825  | 0.46  | 199  | 142  | 234  | 3674  | Dolerite           |
| 17DL03-1-30 | 9.14   | 0.000 | 44.1  | 0.04 | 1.30  | 4.04  | 0.47 | 25.7 | 10.0 | 141.9 | 56.0  | 295.3 | 65.1  | 725  | 122.9 | 10411 | 5.15  | 488  | 393  | 406  | 10168 | Granitoid(<70-75%) |
| 17DL03-1-31 | 0.65   | 0.188 | 23.1  | 0.83 | 10.88 | 10.41 | 1.88 | 37.9 | 9.6  | 98.5  | 31.2  | 130.8 | 23.1  | 219  | 32.8  | 8668  | 0.58  | 662  | 278  | 109  | 7189  | Dolerite           |
| 17DL03-1-32 | 2.53   | 0.040 | 30.8  | 0.42 | 7.66  | 11.95 | 1.92 | 44.9 | 12.7 | 132.6 | 44.6  | 208.3 | 42.7  | 460  | 77.8  | 9186  | 1.12  | 411  | 229  | 258  | 5928  | Dolerite           |
| 17DL03-1-33 | 1.37   | 0.000 | 32.3  | 0.07 | 1.35  | 3.30  | 1.00 | 17.3 | 5.5  | 68.5  | 24.7  | 122.4 | 26.8  | 292  | 49.3  | 9690  | 1.05  | 215  | 143  | 165  | 3693  | Dolerite           |
| 17DL03-1-34 | 162.36 | 0.025 | 101.6 | 0.23 | 4.52  | 9.72  | 0.35 | 62.2 | 27.3 | 393.7 | 155.8 | 807.6 | 180.1 | 1935 | 289.8 | 10093 | 30.04 | 1269 | 1035 | 1610 | 26785 | granitoid(>75%)    |
| 17DL03-1-35 | 1.54   | 0.015 | 21.7  | 0.02 | 0.54  | 1.18  | 0.27 | 5.4  | 2.0  | 25.3  | 9.3   | 49.7  | 11.6  | 132  | 25.7  | 7926  | 0.43  | 107  | 36   | 40   | 941   | basalt             |
| 17DL03-1-36 | 3.39   | 0.013 | 12.3  | 0.04 | 0.90  | 2.60  | 0.09 | 16.2 | 5.8  | 77.9  | 29.2  | 143.7 | 29.8  | 314  | 50.3  | 10107 | 1.81  | 219  | 119  | 128  | 3077  | Dolerite           |
| 17DL03-1-37 | 3.06   | 0.008 | 9.7   | 0.07 | 1.28  | 2.73  | 0.11 | 15.7 | 5.8  | 73.4  | 26.0  | 121.2 | 23.7  | 241  | 36.4  | 9828  | 1.29  | 242  | 111  | 139  | 2869  | Dolerite           |
| 17DL03-1-38 | 1.32   | 0.040 | 17.0  | 0.06 | 1.13  | 2.31  | 0.34 | 13.4 | 5.1  | 66.2  | 24.9  | 122.9 | 26.2  | 285  | 46.2  | 9456  | 0.75  | 285  | 167  | 189  | 4335  | Dolerite           |
| 17DL03-1-39 | 1.09   | 0.010 | 32.7  | 0.09 | 1.66  | 3.69  | 0.92 | 16.6 | 4.5  | 49.7  | 16.2  | 74.7  | 15.6  | 170  | 28.4  | 8487  | 0.45  | 310  | 108  | 89   | 2786  | Dolerite           |
| 17DL03-1-40 | 4.80   | 0.132 | 32.8  | 0.07 | 1.10  | 2.46  | 0.25 | 15.4 | 6.2  | 81.8  | 31.5  | 157.4 | 35.2  | 384  | 63.7  | 10608 | 2.52  | 494  | 159  | 128  | 4125  | Granitoid(<65%)    |
| 17DL03-1-41 | 1.65   | 0.000 | 13.7  | 0.09 | 2.14  | 3.59  | 1.08 | 14.4 | 4.4  | 48.8  | 16.7  | 74.3  | 15.2  | 164  | 27.4  | 8550  | 0.73  | 303  | 153  | 225  | 3964  | Dolerite           |
| 17DL03-1-42 | 0.45   | 0.043 | 13.4  | 0.40 | 5.92  | 8.33  | 0.45 | 34.2 | 10.2 | 112.5 | 36.1  | 152.8 | 27.8  | 267  | 40.0  | 7501  | 0.27  | 205  | 143  | 194  | 3695  | basalt             |
| 17DL03-1-43 | 0.45   | 0.014 | 0.3   | 0.00 | 0.05  | 0.12  | 0.09 | 1.3  | 0.6  | 8.6   | 3.1   | 12.2  | 2.0   | 21   | 3.4   | 10234 | 0.59  | 27   | 1    | 130  | 17    | carbonate          |
| 17DL03-1-44 | 0.82   | 0.096 | 8.3   | 0.63 | 8.52  | 10.86 | 0.86 | 34.3 | 9.3  | 98.8  | 32.5  | 140.4 | 29.1  | 300  | 46.7  | 8183  | 0.71  | 665  | 490  | 715  | 12693 | Dolerite           |
| 17DL03-1-45 | 45.95  | 0.011 | 32.2  | 0.11 | 2.37  | 5.49  | 0.10 | 32.7 | 13.3 | 189.0 | 70.2  | 353.6 | 74.7  | 780  | 119.0 | 9942  | 17.70 | 584  | 456  | 650  | 11808 | Dolerite           |
| 17DL03-1-46 | 15.72  | 0.006 | 0.1   | 0.00 | 0.03  | 0.05  | 0.02 | 0.5  | 0.5  | 14.5  | 10.4  | 109.3 | 48.9  | 944  | 236.8 | 14377 | 92.68 | 61   | 0    | 301  | 12    | Granitoid(<70-75%) |
| 17DL03-1-47 | 0.49   | 0.006 | 37.2  | 0.17 | 2.59  | 5.75  | 1.95 | 16.2 | 3.4  | 28.0  | 7.0   | 23.9  | 4.2   | 35   | 5.3   | 10255 | 0.19  | 181  | 123  | 85   | 3173  | carbonate          |
| 17DL03-1-48 | 1.01   | 0.052 | 35.1  | 0.38 | 5.43  | 7.53  | 1.87 | 19.6 | 4.3  | 38.6  | 10.4  | 39.2  | 7.2   | 77   | 12.1  | 6918  | 0.42  | 399  | 146  | 91   | 3777  | carbonate          |
| 17DL03-1-49 | 1.05   | 0.000 | 3.1   | 0.00 | 0.15  | 0.30  | 0.19 | 3.1  | 1.4  | 23.1  | 9.9   | 56.3  | 13.5  | 171  | 32.0  | 10764 | 1.01  | 57   | 26   | 159  | 672   | Granitoid(<65%)    |
| 17DL03-1-50 | 0.83   | 0.083 | 13.9  | 0.47 | 6.37  | 9.49  | 1.15 | 34.9 | 10.3 | 128.8 | 44.2  | 208.9 | 43.1  | 460  | 73.7  | 8386  | 0.85  | 715  | 556  | 565  | 14406 | Dolerite           |
| 17DL03-1-51 | 2.08   | 0.000 | 4.6   | 0.02 | 0.67  | 2.02  | 0.11 | 13.2 | 5.0  | 68.7  | 25.1  | 121.8 | 25.3  | 269  | 43.9  | 9760  | 1.61  | 259  | 154  | 492  | 3976  | Dolerite           |
| 17DL03-1-52 | 0.94   | 0.014 | 12.4  | 0.11 | 1.99  | 3.41  | 0.31 | 18.1 | 5.9  | 74.0  | 25.9  | 122.4 | 24.6  | 254  | 41.1  | 8672  | 0.55  | 195  | 100  | 135  | 2599  | Dolerite           |
| 17DL03-1-53 | 1.82   | 0.005 | 6.4   | 0.11 | 1.84  | 5.85  | 0.16 | 31.6 | 10.1 | 114.0 | 35.2  | 146.7 | 26.8  | 252  | 37.4  | 9878  | 1.10  | 657  | 210  | 303  | 5428  | Dolerite           |
| 17DL03-1-54 | 0.90   | 0.014 | 14.5  | 0.08 | 1.41  | 2.49  | 0.45 | 13.0 | 3.7  | 45.4  | 15.8  | 73.1  | 15.2  | 159  | 26.5  | 8337  | 0.41  | 120  | 82   | 99   | 2135  | Dolerite           |
| 17DL03-1-55 | 1.25   | 0.000 | 17.8  | 0.17 | 2.50  | 4.01  | 0.58 | 15.8 | 4.3  | 44.4  | 13.8  | 56.3  | 10.9  | 110  | 17.6  | 8010  | 0.52  | 287  | 142  | 182  | 3687  | carbonate          |
| 17DL03-1-56 | 5.17   | 0.009 | 15.9  | 0.03 | 0.94  | 2.15  | 0.07 | 14.1 | 4.9  | 65.1  | 24.1  | 116.9 | 24.0  | 253  | 40.2  | 9674  | 2.19  | 211  | 115  | 326  | 2973  | Dolerite           |
| 17DL03-1-57 | 0.45   | 0.015 | 3.3   | 0.04 | 0.43  | 0.79  | 0.18 | 3.2  | 0.8  | 8.6   | 2.6   | 10.9  | 2.0   | 20   | 3.4   | 9118  | 0.28  | 96   | 20   | 107  | 520   | carbonate          |
| 17DL03-1-58 | 4.21   | 0.000 | 39.1  | 0.08 | 1.10  | 3.11  | 0.69 | 20.0 | 7.1  | 97.2  | 37.5  | 185.2 | 41.0  | 468  | 79.6  | 10015 | 2.67  | 353  | 209  | 195  | 5408  | Dolerite           |
| 17DL03-1-59 | 1.21   | 0.000 | 31.1  | 0.09 | 1.52  | 3.08  | 0.68 | 15.5 | 4.3  | 46.3  | 15.1  | 68.4  | 14.2  | 153  | 25.5  | 9018  | 0.44  | 195  | 128  | 116  | 3302  | Dolerite           |
| 17DL03-1-60 | 0.60   | 0.000 | 4.8   | 0.06 | 0.71  | 1.26  | 0.30 | 7.6  | 2.5  | 32.0  | 12.5  | 63.5  | 13.7  | 159  | 28.5  | 8757  | 0.39  | 234  | 94   | 152  | 2437  | Dolerite           |
| 17DL03-1-61 | 6.54   | 0.015 | 12.6  | 0.02 | 0.46  | 1.74  | 0.16 | 15.2 | 6.8  | 104.0 | 45.2  | 233.7 | 51.2  | 563  | 94.8  | 10280 | 2.89  | 599  | 164  | 392  | 4237  | Granitoid(<70-75%) |
| 17DL03-1-62 | 3.23   | 0.006 | 18.0  | 0.02 | 0.88  | 2.27  | 0.15 | 12.5 | 4.8  | 61.1  | 22.2  | 109.9 | 21.9  | 226  | 36.7  | 10616 | 1.64  | 334  | 182  | 208  | 4709  | Granitoid(<65%)    |
| 17DL03-1-63 | 1.15   | 0.021 | 7.8   | 0.27 | 5.44  | 10.12 | 0.55 | 39.5 | 9.4  | 94.8  | 28.0  | 109.0 | 19.4  | 182  | 27.6  | 9088  | 0.56  | 478  | 166  | 227  | 4287  | Dolerite           |
| 17DL03-1-64 | 7.40   | 0.000 | 21.5  | 0.02 | 0.83  | 2.51  | 0.05 | 15.0 | 6.2  | 90.5  | 36.2  | 188.5 | 42.9  | 476  | 79.6  | 11080 | 3.62  | 617  | 362  | 712  | 9381  | Granitoid(<65%)    |
| 17DL03-1-65 | 0.94   | 0.000 | 0.7   | 0.03 | 0.79  | 3.45  | 0.04 | 30.5 | 13.1 | 175.5 | 62.3  | 284.2 | 55.9  | 573  | 90.5  | 11084 | 0.84  | 170  | 90   | 512  | 2331  | Granitoid(<70-75%) |
| 17DL03-1-66 | 1.09   | 0.000 | 6.1   | 0.04 | 0.65  | 1.81  | 0.05 | 10.3 | 4.0  | 52.1  | 20.1  | 96.5  | 20.1  | 205  | 33.4  | 10963 | 0.99  | 302  | 130  | 290  | 3353  | Granitoid(<65%)    |
| 17DL03-1-67 | 1.04   | 0.003 | 13.6  | 0.08 | 1.02  | 2.48  | 0.44 | 11.5 | 3.5  | 39.6  | 12.9  | 64.3  | 13.4  | 152  | 26.4  | 8875  | 0.68  | 554  | 345  | 432  | 8940  | Dolerite           |

|              |      |       |      |      |      |       |      |      |      |       |       |       |      |     |       |       |      |      |     |     |       |                    |
|--------------|------|-------|------|------|------|-------|------|------|------|-------|-------|-------|------|-----|-------|-------|------|------|-----|-----|-------|--------------------|
| 17DL03-1-68  | 7.43 | 0.015 | 73.5 | 0.14 | 2.27 | 4.22  | 0.40 | 17.3 | 5.2  | 61.8  | 22.6  | 114.0 | 24.0 | 272 | 44.9  | 9513  | 2.01 | 747  | 407 | 235 | 10544 | Dolerite           |
| 17DL03-1-69  | 2.71 | 0.000 | 13.1 | 0.04 | 1.11 | 3.71  | 0.90 | 23.0 | 7.3  | 97.1  | 34.9  | 163.6 | 32.0 | 329 | 55.6  | 8713  | 1.57 | 526  | 133 | 173 | 3451  | Dolerite           |
| 17DL03-1-70  | 0.79 | 0.006 | 17.1 | 0.05 | 1.00 | 2.47  | 0.75 | 12.3 | 3.5  | 42.5  | 15.3  | 76.2  | 17.0 | 200 | 37.0  | 7975  | 0.42 | 98   | 42  | 110 | 1096  | basalt             |
| 17DL03-1-71  | 0.76 | 0.000 | 16.5 | 0.12 | 2.49 | 5.35  | 1.03 | 22.5 | 7.2  | 78.5  | 26.9  | 125.8 | 25.7 | 275 | 46.7  | 9272  | 0.22 | 119  | 59  | 117 | 1516  | Dolerite           |
| 17DL03-1-72  | 1.45 | 0.006 | 21.1 | 0.05 | 1.19 | 3.03  | 0.72 | 18.2 | 6.4  | 77.2  | 26.8  | 119.2 | 22.7 | 234 | 38.1  | 10895 | 0.79 | 288  | 202 | 150 | 5231  | Granitoid(<65%)    |
| 17DL03-1-73  | 8.34 | 0.000 | 26.3 | 0.03 | 0.60 | 2.58  | 0.70 | 17.5 | 6.8  | 95.8  | 38.4  | 198.2 | 42.4 | 477 | 81.2  | 11373 | 3.87 | 734  | 372 | 532 | 9640  | Granitoid(<65%)    |
| 17DL03-1-74  | 1.31 | 0.074 | 19.0 | 0.55 | 5.90 | 8.34  | 2.15 | 27.7 | 8.1  | 98.2  | 33.7  | 155.5 | 32.3 | 346 | 56.0  | 7078  | 0.61 | 370  | 257 | 152 | 6651  | basalt             |
| 17DL03-1-75  | 3.02 | 0.000 | 18.9 | 0.05 | 0.83 | 1.94  | 0.15 | 12.3 | 4.5  | 57.7  | 21.1  | 97.9  | 19.6 | 205 | 32.1  | 11488 | 1.48 | 259  | 97  | 95  | 2520  | Granitoid(<65%)    |
| 17DL03-1-76  | 5.54 | 0.009 | 37.5 | 0.07 | 1.08 | 2.88  | 0.35 | 16.2 | 6.9  | 101.5 | 41.9  | 243.1 | 59.4 | 747 | 139.6 | 12011 | 3.51 | 511  | 335 | 725 | 8670  | Granitoid(<70-75%) |
| 17DL03-1-77  | 2.98 | 0.009 | 11.4 | 0.02 | 0.66 | 1.32  | 0.07 | 7.3  | 3.3  | 41.7  | 15.7  | 77.2  | 16.3 | 186 | 30.1  | 9845  | 1.60 | 249  | 192 | 280 | 4978  | Dolerite           |
| 17DL03-1-78  | 3.81 | 0.015 | 22.0 | 0.05 | 1.02 | 3.39  | 0.37 | 20.9 | 7.4  | 95.4  | 34.5  | 161.6 | 32.5 | 333 | 53.1  | 10410 | 1.38 | 696  | 257 | 251 | 6661  | Granitoid(<65%)    |
| 17DL03-1-80  | 4.13 | 0.012 | 16.9 | 0.05 | 1.04 | 3.43  | 0.42 | 17.9 | 5.6  | 64.6  | 21.1  | 95.5  | 18.6 | 196 | 31.4  | 11029 | 1.94 | 221  | 98  | 260 | 2543  | Granitoid(<65%)    |
| 17DL03-1-81  | 1.59 | 0.025 | 16.7 | 0.12 | 2.38 | 4.68  | 1.14 | 19.0 | 5.1  | 51.0  | 15.7  | 66.8  | 13.4 | 141 | 22.1  | 8366  | 0.89 | 630  | 248 | 232 | 6419  | Dolerite           |
| 17DL03-1-82  | 0.62 | 0.009 | 6.5  | 0.04 | 0.49 | 1.08  | 0.12 | 6.8  | 2.4  | 33.1  | 12.8  | 68.7  | 14.1 | 155 | 26.9  | 10531 | 0.42 | 221  | 115 | 144 | 2981  | Granitoid(<65%)    |
| 17DL03-1-83  | 0.72 | 0.000 | 0.5  | 0.01 | 0.06 | 0.24  | 0.18 | 2.1  | 0.6  | 5.1   | 1.0   | 3.6   | 0.6  | 4   | 0.7   | 12241 | 1.43 | 108  | 4   | 176 | 101   | Kimberlite         |
| 17DL03-1-84  | 2.61 | 0.000 | 8.7  | 0.02 | 0.40 | 1.74  | 0.47 | 12.7 | 4.9  | 64.7  | 24.8  | 120.1 | 25.5 | 284 | 50.6  | 12946 | 1.62 | 202  | 114 | 208 | 2942  | Granitoid(<65%)    |
| 17DL03-1-85  | 0.18 | 0.003 | 1.7  | 0.07 | 1.89 | 4.81  | 0.05 | 20.8 | 4.4  | 30.4  | 6.2   | 18.5  | 2.6  | 22  | 2.8   | 10739 | 0.05 | 483  | 158 | 287 | 4099  | carbonate          |
| 17DL03-1-86  | 2.99 | 0.003 | 4.1  | 0.02 | 0.32 | 1.50  | 0.24 | 12.3 | 5.5  | 73.5  | 29.5  | 146.9 | 31.4 | 366 | 63.3  | 10788 | 0.93 | 186  | 40  | 414 | 1023  | Granitoid(<65%)    |
| 17DL03-1-87  | 1.59 | 0.000 | 32.5 | 0.08 | 1.49 | 3.49  | 0.73 | 14.5 | 3.9  | 39.9  | 12.4  | 52.5  | 9.8  | 99  | 15.3  | 9980  | 0.74 | 323  | 236 | 96  | 6108  | carbonate          |
| 17DL03-1-88  | 0.90 | 0.009 | 8.4  | 0.10 | 1.98 | 2.65  | 0.40 | 10.9 | 3.2  | 37.1  | 12.9  | 59.3  | 12.7 | 138 | 23.1  | 7349  | 0.58 | 295  | 165 | 164 | 4267  | basalt             |
| 17DL03-1-89  | 4.70 | 0.027 | 14.4 | 0.08 | 1.03 | 2.58  | 0.35 | 14.4 | 4.7  | 62.7  | 23.0  | 106.8 | 21.3 | 225 | 34.6  | 9447  | 1.80 | 176  | 98  | 270 | 2536  | Dolerite           |
| 17DL03-1-90  | 0.68 | 0.021 | 6.4  | 0.17 | 2.87 | 4.03  | 0.37 | 16.0 | 4.9  | 56.1  | 19.2  | 89.1  | 18.6 | 194 | 31.9  | 8222  | 0.52 | 535  | 402 | 516 | 10411 | Dolerite           |
| 17DL03-1-91  | 2.97 | 0.011 | 15.5 | 0.06 | 0.95 | 2.37  | 0.20 | 15.2 | 5.6  | 70.0  | 26.0  | 124.1 | 25.5 | 275 | 44.5  | 9695  | 1.51 | 237  | 185 | 226 | 4787  | Dolerite           |
| 17DL03-1-92  | 3.35 | 0.014 | 21.8 | 0.10 | 1.85 | 4.31  | 0.16 | 28.2 | 9.6  | 113.8 | 42.7  | 194.8 | 37.0 | 370 | 57.2  | 10085 | 0.92 | 423  | 166 | 86  | 4303  | Dolerite           |
| 17DL03-1-93  | 1.82 | 0.000 | 7.1  | 0.05 | 0.95 | 1.93  | 0.10 | 9.9  | 3.4  | 39.9  | 13.9  | 67.6  | 13.5 | 143 | 22.5  | 9864  | 0.62 | 376  | 135 | 161 | 3496  | Dolerite           |
| 17DL03-1-94  | 1.51 | 0.022 | 10.4 | 0.19 | 3.61 | 7.54  | 0.42 | 40.0 | 11.7 | 128.2 | 41.8  | 178.2 | 32.1 | 316 | 48.1  | 9070  | 0.52 | 1019 | 389 | 245 | 10071 | Dolerite           |
| 17DL03-1-95  | 0.94 | 0.000 | 9.2  | 0.07 | 1.15 | 2.07  | 0.53 | 12.7 | 3.9  | 45.1  | 15.7  | 68.2  | 14.1 | 148 | 24.4  | 9285  | 0.57 | 145  | 74  | 114 | 1904  | Dolerite           |
| 17DL03-1-96  | 2.35 | 0.011 | 11.8 | 0.04 | 0.89 | 2.56  | 0.27 | 15.9 | 5.6  | 75.2  | 29.0  | 141.1 | 30.1 | 320 | 53.3  | 9421  | 1.09 | 209  | 105 | 143 | 2730  | Dolerite           |
| 17DL03-1-97  | 1.40 | 0.059 | 12.7 | 0.43 | 6.37 | 11.18 | 2.14 | 58.7 | 19.4 | 240.3 | 84.6  | 376.9 | 68.3 | 665 | 104.9 | 8466  | 1.05 | 658  | 177 | 155 | 4582  | Dolerite           |
| 17DL03-1-98  | 4.07 | 0.000 | 21.1 | 0.04 | 0.78 | 2.77  | 0.46 | 22.0 | 9.1  | 128.8 | 50.4  | 244.9 | 51.2 | 541 | 87.3  | 10437 | 2.98 | 320  | 181 | 225 | 4673  | Granitoid(<70-75%) |
| 17DL03-1-99  | 1.85 | 0.036 | 34.5 | 0.10 | 1.36 | 1.97  | 0.29 | 10.5 | 3.6  | 47.5  | 18.2  | 86.2  | 17.8 | 191 | 33.6  | 9311  | 0.89 | 625  | 214 | 291 | 5541  | Dolerite           |
| 17DL03-1-100 | 1.83 | 0.024 | 35.9 | 0.16 | 2.92 | 5.09  | 1.36 | 23.5 | 6.9  | 83.9  | 29.6  | 139.2 | 27.8 | 294 | 47.8  | 8327  | 0.70 | 253  | 99  | 60  | 2552  | Dolerite           |
| 17DL04-1-01  | 2.23 | 0.000 | 13.9 | 0.04 | 0.80 | 2.07  | 0.17 | 12.7 | 4.6  | 60.3  | 23.4  | 119.0 | 26.8 | 303 | 45.9  | 11757 | 1.73 | 279  | 113 | 93  | 2625  | Granitoid(<65%)    |
| 17DL04-1-02  | 3.32 | 0.034 | 43.8 | 0.26 | 4.59 | 8.63  | 1.76 | 36.2 | 11.5 | 133.9 | 45.1  | 207.5 | 42.2 | 457 | 68.7  | 8474  | 1.58 | 206  | 149 | 88  | 3458  | Dolerite           |
| 17DL04-1-03  | 2.88 | 0.062 | 12.9 | 0.48 | 8.20 | 14.64 | 1.53 | 76.2 | 25.0 | 304.3 | 105.2 | 458.8 | 90.2 | 927 | 130.5 | 8001  | 1.62 | 733  | 501 | 536 | 11586 | Dolerite           |
| 17DL04-1-04  | 4.87 | 0.116 | 61.6 | 0.16 | 2.80 | 5.86  | 2.21 | 29.1 | 10.5 | 146.7 | 56.6  | 293.0 | 66.1 | 783 | 125.0 | 8142  | 1.40 | 420  | 331 | 213 | 7653  | Dolerite           |
| 17DL04-1-06  | 1.34 | 0.087 | 41.0 | 0.64 | 9.42 | 10.83 | 3.29 | 33.1 | 8.1  | 79.7  | 22.5  | 89.2  | 17.4 | 181 | 24.8  | 8333  | 0.60 | 296  | 136 | 62  | 3138  | Dolerite           |
| 17DL04-1-07  | 2.46 | 0.491 | 28.4 | 0.27 | 2.60 | 4.27  | 1.07 | 22.1 | 7.6  | 97.6  | 35.6  | 167.6 | 36.1 | 401 | 62.9  | 8864  | 1.27 | 147  | 106 | 71  | 2443  | Dolerite           |
| 17DL04-1-08  | 1.00 | 0.027 | 8.1  | 0.07 | 1.24 | 1.85  | 0.92 | 8.5  | 3.3  | 45.7  | 19.2  | 107.2 | 26.4 | 334 | 61.6  | 7509  | 0.52 | 157  | 105 | 131 | 2428  | basalt             |
| 17DL04-1-09  | 3.38 | 0.020 | 90.8 | 0.39 | 7.22 | 12.49 | 3.81 | 56.3 | 16.6 | 202.5 | 70.8  | 333.6 | 68.1 | 739 | 114.6 | 7269  | 0.88 | 315  | 260 | 151 | 6022  | basalt             |
| 17DL04-1-10  | 0.63 | 0.000 | 0.6  | 0.02 | 0.67 | 3.40  | 0.03 | 28.8 | 13.4 | 170.8 | 52.6  | 212.1 | 39.9 | 388 | 52.4  | 11828 | 0.57 | 175  | 67  | 457 | 1558  | Granitoid(<65%)    |
| 17DL04-1-11  | 2.82 | 0.026 | 9.7  | 0.04 | 0.63 | 1.71  | 0.10 | 10.9 | 3.9  | 53.8  | 20.3  | 99.2  | 21.4 | 229 | 34.8  | 9166  | 1.76 | 242  | 133 | 224 | 3086  | Dolerite           |

|             |       |       |      |      |      |       |      |      |      |       |      |       |      |     |       |       |      |     |     |     |       |                    |
|-------------|-------|-------|------|------|------|-------|------|------|------|-------|------|-------|------|-----|-------|-------|------|-----|-----|-----|-------|--------------------|
| 17DL04-1-12 | 1.03  | 0.007 | 2.8  | 0.10 | 1.99 | 4.63  | 0.42 | 26.3 | 9.1  | 115.1 | 40.7 | 187.2 | 39.0 | 418 | 63.4  | 9590  | 0.68 | 183 | 105 | 139 | 2433  | Dolerite           |
| 17DL04-1-13 | 11.69 | 0.000 | 21.2 | 0.04 | 0.93 | 2.48  | 0.10 | 17.0 | 6.6  | 91.1  | 34.8 | 173.6 | 37.6 | 402 | 58.4  | 11536 | 6.32 | 265 | 161 | 413 | 3717  | Granitoid(<65%)    |
| 17DL04-1-14 | 1.97  | 0.134 | 11.4 | 0.09 | 0.97 | 1.90  | 0.13 | 11.4 | 4.3  | 53.8  | 19.6 | 93.6  | 19.8 | 211 | 31.0  | 10097 | 1.16 | 212 | 199 | 229 | 4610  | Dolerite           |
| 17DL04-1-15 | 2.47  | 0.011 | 12.1 | 0.10 | 2.10 | 4.23  | 0.47 | 23.3 | 8.4  | 106.6 | 42.3 | 210.8 | 46.6 | 520 | 83.7  | 8578  | 1.15 | 363 | 209 | 293 | 4824  | Dolerite           |
| 17DL04-1-16 | 2.11  | 0.012 | 6.6  | 0.06 | 0.82 | 1.63  | 0.22 | 10.4 | 3.8  | 48.4  | 18.6 | 89.5  | 19.1 | 205 | 31.7  | 9246  | 1.16 | 146 | 75  | 157 | 1745  | Dolerite           |
| 17DL04-1-17 | 2.12  | 0.008 | 20.4 | 0.08 | 1.66 | 3.86  | 0.94 | 22.2 | 7.8  | 101.5 | 37.9 | 186.6 | 40.3 | 445 | 70.1  | 8304  | 1.04 | 250 | 161 | 169 | 3725  | Dolerite           |
| 17DL04-1-18 | 4.20  | 0.021 | 47.3 | 0.10 | 2.12 | 4.71  | 1.18 | 27.6 | 9.8  | 128.7 | 49.8 | 249.2 | 56.7 | 636 | 103.4 | 9702  | 2.08 | 689 | 493 | 338 | 11414 | Dolerite           |
| 17DL04-1-19 | 1.61  | 0.012 | 11.8 | 0.06 | 1.61 | 4.91  | 0.99 | 30.3 | 11.9 | 166.7 | 65.8 | 332.2 | 74.9 | 824 | 131.5 | 10298 | 1.08 | 161 | 99  | 141 | 2298  | Granitoid(<70-75%) |
| 17DL04-1-20 | 5.28  | 0.054 | 39.8 | 0.13 | 2.71 | 6.09  | 2.63 | 38.6 | 12.9 | 173.8 | 65.5 | 315.0 | 66.8 | 713 | 112.4 | 10171 | 2.18 | 174 | 120 | 114 | 2788  | Granitoid(<70-75%) |
| 17DL04-1-21 | 2.81  | 0.004 | 18.4 | 0.03 | 0.65 | 1.58  | 0.30 | 10.3 | 3.9  | 52.5  | 20.3 | 101.8 | 23.0 | 247 | 39.8  | 10707 | 1.87 | 341 | 172 | 321 | 3980  | Granitoid(<65%)    |
| 17DL04-1-22 | 2.88  | 0.000 | 18.9 | 0.04 | 0.73 | 2.17  | 0.23 | 14.0 | 5.3  | 73.2  | 28.6 | 140.8 | 31.0 | 329 | 51.8  | 10142 | 1.77 | 285 | 188 | 188 | 4359  | Dolerite           |
| 17DL04-1-23 | 7.90  | 0.018 | 56.6 | 0.13 | 2.84 | 7.24  | 1.17 | 43.3 | 15.9 | 209.2 | 76.0 | 358.4 | 73.7 | 761 | 114.0 | 9716  | 3.11 | 446 | 294 | 293 | 6803  | Dolerite           |
| 17DL04-1-24 | 4.68  | 0.000 | 42.9 | 0.08 | 1.66 | 4.16  | 0.53 | 22.6 | 8.6  | 109.0 | 41.2 | 204.1 | 43.9 | 481 | 73.3  | 10324 | 2.38 | 372 | 284 | 233 | 6560  | Granitoid(<65%)    |
| 17DL04-1-25 | 0.70  | 0.014 | 5.1  | 0.23 | 4.44 | 8.54  | 0.27 | 32.4 | 9.3  | 97.9  | 31.4 | 134.5 | 26.6 | 266 | 38.6  | 9936  | 0.29 | 212 | 81  | 72  | 1882  | Dolerite           |
| 17DL04-1-28 | 5.99  | 0.032 | 62.4 | 0.13 | 2.89 | 6.47  | 1.93 | 34.4 | 11.7 | 144.4 | 52.5 | 247.3 | 53.9 | 589 | 89.2  | 9778  | 2.51 | 486 | 337 | 298 | 7798  | Dolerite           |
| 17DL04-1-29 | 3.37  | 0.042 | 11.4 | 0.04 | 1.00 | 2.88  | 0.30 | 18.9 | 7.5  | 97.7  | 37.2 | 179.2 | 38.2 | 405 | 64.8  | 10116 | 1.68 | 280 | 174 | 230 | 4032  | Dolerite           |
| 17DL04-1-30 | 2.82  | 0.018 | 11.4 | 0.13 | 2.22 | 5.06  | 0.61 | 30.0 | 10.2 | 128.7 | 45.6 | 214.5 | 44.2 | 464 | 70.2  | 9158  | 1.79 | 534 | 201 | 321 | 4653  | Dolerite           |
| 17DL04-1-31 | 1.76  | 0.006 | 11.1 | 0.05 | 1.56 | 3.51  | 0.33 | 20.1 | 7.5  | 95.7  | 34.5 | 167.6 | 36.1 | 394 | 59.0  | 9786  | 1.11 | 160 | 111 | 121 | 2580  | Dolerite           |
| 17DL04-1-32 | 1.99  | 0.031 | 12.4 | 0.07 | 1.70 | 3.67  | 0.47 | 21.4 | 7.6  | 93.5  | 33.4 | 157.5 | 33.5 | 363 | 54.6  | 9747  | 1.20 | 145 | 142 | 135 | 3278  | Dolerite           |
| 17DL04-1-34 | 1.48  | 0.020 | 10.0 | 0.07 | 1.10 | 2.16  | 0.26 | 10.6 | 3.4  | 40.1  | 13.9 | 65.5  | 13.7 | 142 | 21.9  | 10178 | 0.66 | 111 | 74  | 48  | 1718  | Granitoid(<65%)    |
| 17DL04-1-35 | 4.06  | 0.014 | 58.7 | 0.19 | 4.06 | 8.01  | 2.11 | 41.4 | 14.1 | 174.3 | 65.1 | 318.0 | 69.4 | 758 | 120.4 | 9426  | 1.66 | 429 | 330 | 195 | 7637  | Dolerite           |
| 17DL04-1-36 | 5.90  | 0.004 | 10.0 | 0.06 | 1.10 | 3.01  | 0.33 | 22.1 | 8.6  | 111.5 | 42.8 | 210.6 | 44.0 | 465 | 69.4  | 10499 | 2.85 | 162 | 107 | 158 | 2469  | Granitoid(<65%)    |
| 17DL04-1-37 | 1.72  | 0.060 | 68.3 | 0.55 | 7.07 | 7.92  | 2.46 | 22.2 | 5.0  | 48.9  | 14.3 | 60.7  | 12.5 | 134 | 20.3  | 9118  | 0.88 | 494 | 530 | 181 | 12253 | carbonate          |
| 17DL04-1-38 | 2.48  | 0.016 | 14.8 | 0.07 | 1.61 | 3.20  | 0.20 | 18.3 | 6.4  | 77.0  | 27.7 | 130.3 | 26.5 | 283 | 41.0  | 10365 | 1.49 | 346 | 342 | 316 | 7922  | Granitoid(<65%)    |
| 17DL04-1-39 | 3.77  | 0.012 | 24.5 | 0.10 | 1.27 | 2.47  | 0.20 | 13.0 | 4.8  | 59.8  | 21.3 | 97.9  | 21.0 | 226 | 34.1  | 10739 | 2.09 | 384 | 389 | 259 | 9003  | Granitoid(<65%)    |
| 17DL04-1-40 | 1.23  | 0.000 | 9.6  | 0.05 | 1.46 | 3.62  | 0.26 | 24.2 | 8.7  | 114.3 | 42.3 | 204.8 | 43.3 | 465 | 70.1  | 10901 | 0.85 | 219 | 133 | 135 | 3082  | Granitoid(<65%)    |
| 17DL04-1-41 | 2.67  | 0.116 | 61.3 | 0.32 | 5.65 | 11.02 | 2.56 | 51.9 | 16.7 | 206.9 | 74.0 | 349.6 | 74.2 | 793 | 119.8 | 9662  | 0.98 | 332 | 245 | 155 | 5659  | Dolerite           |
| 17DL04-1-42 | 3.05  | 0.148 | 41.1 | 0.23 | 3.35 | 5.55  | 1.45 | 25.8 | 8.9  | 108.3 | 37.3 | 179.8 | 38.1 | 430 | 65.4  | 9359  | 1.25 | 86  | 91  | 52  | 2098  | Dolerite           |
| 17DL04-1-43 | 0.52  | 0.012 | 9.6  | 0.01 | 0.10 | 0.20  | 0.13 | 0.9  | 0.5  | 7.2   | 3.0  | 16.4  | 4.3  | 56  | 10.8  | 12406 | 0.17 | 139 | 107 | 242 | 2465  | carbonate          |
| 17DL04-1-44 | 1.51  | 0.014 | 22.6 | 0.24 | 4.16 | 8.21  | 2.31 | 41.1 | 12.2 | 145.0 | 50.8 | 222.7 | 44.0 | 460 | 70.0  | 9590  | 0.78 | 200 | 144 | 66  | 3335  | Dolerite           |
| 17DL04-1-45 | 1.51  | 0.000 | 13.5 | 0.08 | 1.12 | 2.63  | 0.45 | 13.0 | 3.9  | 46.6  | 17.6 | 82.1  | 18.1 | 212 | 33.7  | 9147  | 0.79 | 140 | 54  | 72  | 1258  | Dolerite           |
| 17DL04-1-46 | 13.21 | 1.374 | 21.2 | 1.02 | 8.91 | 9.36  | 0.60 | 42.5 | 13.4 | 170.7 | 60.1 | 265.4 | 52.8 | 543 | 78.4  | 10545 | 5.89 | 252 | 205 | 174 | 4743  | Granitoid(<70-75%) |
| 17DL04-1-47 | 2.43  | 0.013 | 32.9 | 0.06 | 1.04 | 3.06  | 0.85 | 17.8 | 6.4  | 83.5  | 32.4 | 161.8 | 36.5 | 411 | 67.5  | 10207 | 1.27 | 260 | 180 | 154 | 4161  | Granitoid(<65%)    |
| 17DL04-1-48 | 2.71  | 0.041 | 32.9 | 0.39 | 6.10 | 10.94 | 2.05 | 53.3 | 18.2 | 227.0 | 82.8 | 389.4 | 81.2 | 868 | 135.6 | 10275 | 1.83 | 296 | 232 | 166 | 5377  | Granitoid(<70-75%) |
| 17DL04-1-49 | 4.23  | 0.000 | 55.0 | 0.06 | 1.58 | 4.30  | 0.79 | 24.9 | 8.7  | 118.9 | 44.6 | 225.3 | 49.1 | 561 | 91.1  | 10429 | 2.15 | 418 | 303 | 252 | 7002  | Granitoid(<70-75%) |
| 17DL04-1-50 | 1.91  | 0.000 | 8.1  | 0.03 | 0.71 | 1.48  | 0.04 | 6.7  | 2.3  | 29.7  | 11.3 | 55.3  | 12.1 | 129 | 20.4  | 11319 | 1.28 | 237 | 135 | 218 | 3135  | carbonate          |
| 17DL04-1-52 | 4.09  | 0.030 | 21.6 | 0.09 | 1.74 | 3.24  | 0.33 | 16.3 | 6.2  | 80.0  | 29.6 | 143.1 | 30.9 | 348 | 53.6  | 10428 | 2.20 | 384 | 367 | 331 | 8483  | Granitoid(<65%)    |
| 17DL04-1-53 | 1.10  | 0.005 | 3.0  | 0.07 | 1.43 | 4.90  | 0.20 | 32.4 | 13.4 | 183.0 | 67.6 | 314.1 | 63.1 | 652 | 97.5  | 10353 | 0.77 | 235 | 133 | 212 | 3081  | Granitoid(<70-75%) |
| 17DL04-1-54 | 2.85  | 0.005 | 34.5 | 0.07 | 1.46 | 4.06  | 1.04 | 24.7 | 8.2  | 112.4 | 41.4 | 208.3 | 45.3 | 502 | 79.8  | 9613  | 1.36 | 175 | 128 | 82  | 2973  | Dolerite           |
| 17DL04-1-56 | 3.04  | 0.030 | 6.7  | 0.18 | 3.57 | 7.49  | 1.04 | 41.4 | 13.2 | 148.7 | 49.6 | 216.0 | 41.0 | 413 | 61.4  | 7764  | 0.76 | 898 | 472 | 564 | 10919 | basalt             |
| 17DL04-1-57 | 1.35  | 0.024 | 10.9 | 0.13 | 1.67 | 3.16  | 1.22 | 15.3 | 5.0  | 61.8  | 21.4 | 100.8 | 20.6 | 226 | 34.9  | 8795  | 0.60 | 142 | 90  | 93  | 2082  | Dolerite           |
| 17DL04-1-58 | 10.18 | 0.940 | 22.0 | 0.53 | 6.71 | 10.98 | 2.32 | 52.8 | 15.9 | 178.1 | 55.0 | 214.7 | 37.1 | 334 | 43.0  | 7225  | 3.93 | 130 | 73  | 86  | 1687  | basalt             |

|               |      |       |       |      |       |       |      |       |      |       |       |       |       |      |       |       |      |      |     |     |       |                    |
|---------------|------|-------|-------|------|-------|-------|------|-------|------|-------|-------|-------|-------|------|-------|-------|------|------|-----|-----|-------|--------------------|
| 17DL04-1-59   | 1.22 | 1.214 | 11.4  | 0.44 | 4.00  | 5.01  | 0.74 | 24.3  | 8.0  | 99.6  | 35.8  | 164.5 | 32.6  | 341  | 52.5  | 9337  | 0.71 | 194  | 136 | 120 | 3138  | Dolerite           |
| 17DL04-1-60   | 2.32 | 0.006 | 19.6  | 0.05 | 0.77  | 2.21  | 0.37 | 13.7  | 5.4  | 73.6  | 28.5  | 145.0 | 31.5  | 358  | 56.5  | 10086 | 1.36 | 223  | 151 | 156 | 3499  | Dolerite           |
| 17DL04-1-61   | 2.87 | 0.263 | 73.1  | 0.43 | 6.75  | 10.58 | 3.57 | 49.1  | 14.7 | 176.9 | 61.6  | 278.2 | 55.1  | 570  | 85.2  | 8172  | 0.77 | 690  | 339 | 151 | 7846  | Dolerite           |
| 17DL04-1-63   | 5.47 | 0.264 | 49.3  | 0.27 | 3.48  | 6.35  | 1.56 | 30.2  | 10.8 | 138.4 | 51.5  | 249.8 | 52.8  | 591  | 89.3  | 9739  | 2.53 | 1018 | 765 | 539 | 17695 | Dolerite           |
| 17DL04-1-64   | 4.72 | 0.027 | 12.6  | 0.06 | 1.20  | 3.14  | 0.08 | 19.1  | 6.7  | 89.3  | 32.4  | 153.8 | 31.8  | 331  | 51.0  | 10150 | 2.00 | 219  | 124 | 178 | 2880  | Granitoid(<65%)    |
| 17DL04-1-65   | 9.90 | 0.004 | 59.5  | 0.06 | 1.69  | 4.61  | 0.77 | 25.9  | 10.0 | 137.5 | 53.2  | 267.1 | 57.9  | 648  | 102.7 | 11205 | 3.89 | 241  | 168 | 167 | 3887  | Granitoid(<70-75%) |
| 17DL04-1-66   | 3.39 | 0.009 | 40.2  | 0.05 | 1.34  | 3.84  | 1.08 | 21.5  | 8.4  | 111.8 | 44.3  | 224.3 | 51.8  | 597  | 94.8  | 9388  | 1.47 | 244  | 195 | 157 | 4513  | Dolerite           |
| 17DL04-1-68   | 1.36 | 0.003 | 11.9  | 0.05 | 0.80  | 1.67  | 0.16 | 7.8   | 2.6  | 35.0  | 12.1  | 59.6  | 13.1  | 154  | 23.7  | 10331 | 0.97 | 326  | 214 | 183 | 4959  | Granitoid(<65%)    |
| 17DL04-1-69   | 2.44 | 0.036 | 79.6  | 0.52 | 8.68  | 12.98 | 3.76 | 46.6  | 12.5 | 132.5 | 43.3  | 193.4 | 38.8  | 408  | 62.7  | 8727  | 1.19 | 293  | 324 | 109 | 7496  | Dolerite           |
| 17DL04-1-70   | 2.22 | 0.021 | 24.1  | 0.14 | 2.52  | 4.16  | 1.68 | 22.9  | 8.2  | 105.5 | 40.2  | 199.6 | 44.2  | 489  | 78.1  | 7682  | 0.80 | 271  | 203 | 105 | 4692  | basalt             |
| 17DL04-1-71   | 1.08 | 0.066 | 11.4  | 0.46 | 8.60  | 19.19 | 4.32 | 101.0 | 32.5 | 394.2 | 134.1 | 598.5 | 117.0 | 1188 | 171.6 | 7343  | 0.47 | 666  | 437 | 341 | 10104 | basalt             |
| 17DL04-1-72   | 3.61 | 0.203 | 30.8  | 0.18 | 2.38  | 4.53  | 0.57 | 25.8  | 9.5  | 125.5 | 46.4  | 229.5 | 50.3  | 536  | 87.3  | 9863  | 1.84 | 397  | 284 | 204 | 6567  | Dolerite           |
| 17DL04-1-73   | 2.68 | 0.004 | 20.5  | 0.04 | 1.14  | 2.45  | 0.39 | 15.9  | 5.8  | 80.5  | 30.4  | 151.4 | 32.6  | 372  | 57.9  | 10172 | 1.13 | 166  | 119 | 101 | 2761  | Granitoid(<65%)    |
| 17DL04-1-74   | 3.71 | 0.545 | 18.8  | 0.20 | 1.94  | 3.46  | 0.21 | 23.5  | 7.6  | 104.3 | 38.5  | 178.1 | 37.1  | 398  | 62.8  | 10817 | 1.85 | 382  | 293 | 361 | 6788  | Granitoid(<65%)    |
| 17DL04-1-75   | 2.08 | 0.011 | 11.4  | 0.04 | 0.88  | 1.97  | 0.26 | 10.2  | 3.7  | 50.9  | 18.9  | 93.4  | 20.6  | 234  | 35.9  | 10650 | 1.29 | 113  | 104 | 120 | 2417  | Granitoid(<65%)    |
| 17DL04-1-76   | 2.78 | 0.000 | 16.9  | 0.06 | 0.87  | 1.77  | 0.32 | 9.7   | 3.8  | 49.2  | 17.7  | 84.8  | 18.8  | 206  | 31.9  | 10161 | 1.71 | 165  | 135 | 187 | 3113  | Granitoid(<65%)    |
| 17DL04-1-77   | 3.11 | 0.017 | 35.7  | 0.09 | 2.00  | 4.08  | 0.78 | 20.6  | 7.4  | 92.5  | 33.6  | 163.6 | 36.4  | 411  | 63.4  | 9948  | 1.80 | 254  | 249 | 199 | 5768  | Dolerite           |
| 17DL04-1-78   | 1.01 | 0.033 | 15.3  | 0.37 | 5.49  | 9.77  | 1.57 | 43.3  | 13.6 | 165.2 | 58.6  | 279.2 | 59.9  | 660  | 101.3 | 9465  | 0.47 | 174  | 150 | 126 | 3473  | Dolerite           |
| 17DL04-1-79   | 2.37 | 0.025 | 36.5  | 0.33 | 5.72  | 8.59  | 2.20 | 33.9  | 10.3 | 117.0 | 39.4  | 171.0 | 35.6  | 379  | 57.5  | 8091  | 1.16 | 132  | 98  | 61  | 2277  | Dolerite           |
| 17DL04-1-80   | 1.61 | 0.005 | 9.6   | 0.02 | 0.50  | 1.64  | 0.12 | 9.8   | 3.8  | 51.0  | 19.3  | 96.2  | 20.7  | 233  | 35.8  | 10723 | 1.10 | 211  | 114 | 185 | 2634  | Granitoid(<65%)    |
| 17DL04-1-81   | 1.44 | 0.034 | 13.4  | 0.33 | 5.94  | 11.00 | 2.97 | 62.0  | 20.9 | 256.9 | 89.5  | 404.2 | 81.9  | 863  | 126.9 | 8242  | 0.74 | 512  | 337 | 258 | 7790  | Dolerite           |
| 17DL04-1-82   | 1.82 | 0.006 | 8.9   | 0.04 | 0.92  | 3.09  | 1.29 | 22.1  | 7.5  | 90.2  | 31.2  | 140.9 | 29.7  | 313  | 47.2  | 9806  | 1.13 | 282  | 151 | 244 | 3501  | Dolerite           |
| 17DL04-1-83   | 2.92 | 0.014 | 83.1  | 0.32 | 5.74  | 8.58  | 1.85 | 33.0  | 9.9  | 111.6 | 38.9  | 182.1 | 38.5  | 414  | 64.3  | 9215  | 1.41 | 451  | 475 | 164 | 10980 | Dolerite           |
| 17DL04-1-84   | 3.96 | 0.032 | 57.8  | 0.21 | 3.91  | 8.82  | 3.66 | 46.6  | 16.3 | 218.1 | 81.3  | 391.0 | 84.5  | 916  | 145.7 | 8636  | 1.47 | 402  | 321 | 171 | 7419  | Dolerite           |
| 17DL04-1-85   | 2.00 | 0.002 | 8.2   | 0.10 | 1.89  | 4.62  | 0.64 | 27.1  | 10.4 | 139.3 | 53.2  | 254.9 | 53.6  | 567  | 87.5  | 8836  | 1.02 | 357  | 258 | 235 | 5962  | Dolerite           |
| 17DL04-1-86   | 0.86 | 0.129 | 5.0   | 0.45 | 7.03  | 11.15 | 0.66 | 50.6  | 16.9 | 203.9 | 73.1  | 329.9 | 65.5  | 660  | 96.8  | 9604  | 0.63 | 265  | 169 | 157 | 3910  | Dolerite           |
| 17DL04-1-87   | 2.34 | 0.023 | 26.3  | 0.04 | 0.94  | 2.14  | 0.41 | 13.6  | 5.0  | 67.8  | 26.1  | 127.0 | 29.3  | 334  | 54.3  | 10048 | 1.20 | 224  | 153 | 147 | 3544  | Dolerite           |
| 17DL04-1-88   | 2.33 | 0.000 | 33.7  | 0.15 | 2.25  | 5.33  | 0.97 | 28.7  | 9.6  | 115.7 | 41.9  | 201.5 | 41.8  | 450  | 71.6  | 9137  | 0.89 | 117  | 89  | 59  | 2070  | Dolerite           |
| 17DL04-1-89   | 4.88 | 0.023 | 16.3  | 0.14 | 3.19  | 6.66  | 0.91 | 36.7  | 12.7 | 160.9 | 58.2  | 267.8 | 55.1  | 578  | 87.5  | 9740  | 1.71 | 205  | 149 | 163 | 3458  | Dolerite           |
| 17DL04-1-90   | 6.29 | 0.020 | 29.0  | 0.08 | 1.37  | 2.70  | 0.34 | 16.3  | 6.1  | 87.3  | 34.1  | 180.4 | 43.3  | 514  | 86.2  | 10399 | 3.25 | 274  | 229 | 516 | 5307  | Granitoid(<70-75%) |
| 17DL04-1-91   | 2.69 | 0.014 | 14.2  | 0.06 | 1.11  | 2.51  | 0.43 | 15.8  | 6.4  | 83.6  | 32.1  | 152.0 | 32.8  | 362  | 55.9  | 9482  | 1.71 | 101  | 100 | 120 | 2308  | Dolerite           |
| 17DL04-1-92   | 3.22 | 0.017 | 51.4  | 0.14 | 2.43  | 5.22  | 1.37 | 26.0  | 8.7  | 105.5 | 37.2  | 174.5 | 37.3  | 397  | 61.2  | 9830  | 1.84 | 208  | 195 | 161 | 4520  | Dolerite           |
| 17DL04-1-93   | 3.71 | 1.028 | 39.2  | 0.51 | 3.03  | 2.87  | 0.31 | 15.4  | 5.9  | 84.1  | 31.9  | 163.2 | 36.4  | 406  | 65.5  | 10398 | 1.99 | 242  | 177 | 148 | 4107  | Granitoid(<65%)    |
| 17DL04-1-94   | 5.73 | 0.076 | 220.8 | 0.68 | 13.09 | 26.05 | 4.25 | 131.5 | 38.6 | 429.7 | 138.5 | 582.9 | 109.3 | 1047 | 150.6 | 6557  | 1.99 | 822  | 708 | 237 | 16390 | basalt             |
| 17DL04-1-95   | 2.42 | 0.006 | 6.7   | 0.02 | 1.00  | 2.43  | 0.21 | 16.5  | 6.1  | 80.5  | 30.4  | 149.6 | 31.2  | 329  | 50.9  | 8482  | 1.08 | 93   | 60  | 92  | 1381  | Dolerite           |
| 17DL04-1-96   | 0.71 | 0.009 | 9.1   | 0.02 | 0.62  | 1.36  | 0.57 | 8.1   | 2.9  | 41.7  | 16.6  | 92.8  | 22.7  | 289  | 56.1  | 10372 | 0.77 | 168  | 110 | 133 | 2537  | Granitoid(<65%)    |
| 17DL04-1-97   | 1.56 | 0.020 | 18.5  | 0.14 | 2.32  | 3.86  | 1.13 | 16.7  | 6.2  | 78.2  | 29.1  | 146.2 | 34.7  | 422  | 69.0  | 10223 | 1.14 | 349  | 208 | 360 | 4818  | Granitoid(<65%)    |
| 17DL04-1-98   | 1.43 | 0.031 | 13.6  | 0.11 | 1.96  | 4.25  | 1.28 | 21.2  | 6.9  | 85.4  | 30.5  | 143.5 | 29.6  | 314  | 50.1  | 8409  | 0.76 | 120  | 80  | 69  | 1848  | Dolerite           |
| 17DL04-1-99   | 1.38 | 0.000 | 23.2  | 0.10 | 1.41  | 3.69  | 1.13 | 19.5  | 6.1  | 81.9  | 30.6  | 143.2 | 31.0  | 331  | 52.9  | 8732  | 0.79 | 121  | 88  | 62  | 2035  | Dolerite           |
| 17DL04-1-100  | 2.04 | 0.000 | 31.5  | 0.05 | 1.06  | 2.36  | 0.55 | 15.2  | 5.6  | 74.9  | 28.6  | 141.8 | 31.9  | 353  | 57.9  | 10192 | 1.09 | 182  | 127 | 111 | 2945  | Granitoid(<65%)    |
| 17DL05-1.1-01 | 1.23 | 0.013 | 12.2  | 0.20 | 4.49  | 9.75  | 1.56 | 50.2  | 15.5 | 175.9 | 61.1  | 268.6 | 50.0  | 488  | 78.2  | 8913  | 0.53 | 266  | 176 | 197 | 4306  | Dolerite           |
| 17DL05-1.1-02 | 3.48 | 0.044 | 17.1  | 0.11 | 1.07  | 2.59  | 0.21 | 15.3  | 5.9  | 73.4  | 28.7  | 136.0 | 30.2  | 327  | 54.4  | 11280 | 2.16 | 208  | 199 | 210 | 4870  | Granitoid(<65%)    |

|               |       |       |      |      |       |       |      |      |      |       |       |       |       |      |       |       |      |      |     |     |       |                    |
|---------------|-------|-------|------|------|-------|-------|------|------|------|-------|-------|-------|-------|------|-------|-------|------|------|-----|-----|-------|--------------------|
| 17DL05-1.1-03 | 3.24  | 0.021 | 34.4 | 0.07 | 1.34  | 2.16  | 0.34 | 12.5 | 4.8  | 62.3  | 24.2  | 123.6 | 26.5  | 299  | 52.1  | 10900 | 1.84 | 223  | 218 | 165 | 5344  | Granitoid(<65%)    |
| 17DL05-1.1-04 | 3.39  | 0.014 | 19.9 | 0.05 | 1.29  | 2.88  | 0.32 | 18.7 | 7.0  | 93.6  | 35.9  | 173.5 | 36.6  | 384  | 64.1  | 10887 | 2.00 | 300  | 193 | 205 | 4728  | Granitoid(<65%)    |
| 17DL05-1.1-05 | 4.66  | 0.000 | 30.3 | 0.05 | 0.89  | 2.64  | 0.42 | 15.3 | 6.3  | 84.7  | 33.3  | 167.8 | 35.5  | 384  | 66.9  | 11052 | 1.92 | 293  | 182 | 207 | 4460  | Granitoid(<65%)    |
| 17DL05-1.1-06 | 1.50  | 0.061 | 8.8  | 0.14 | 2.34  | 6.22  | 0.80 | 41.6 | 17.5 | 257.1 | 100.4 | 504.8 | 108.2 | 1143 | 197.1 | 11593 | 1.03 | 159  | 95  | 152 | 2332  | Granitoid(<70-75%) |
| 17DL05-1.1-07 | 0.86  | 0.062 | 17.6 | 0.14 | 1.70  | 4.58  | 1.05 | 20.3 | 6.9  | 86.3  | 32.1  | 158.3 | 32.8  | 358  | 62.9  | 9312  | 0.61 | 190  | 130 | 98  | 3185  | Dolerite           |
| 17DL05-1.1-08 | 2.46  | 0.010 | 30.7 | 0.17 | 3.56  | 7.06  | 2.07 | 33.5 | 9.7  | 122.1 | 43.9  | 212.8 | 44.0  | 473  | 82.5  | 11291 | 1.20 | 345  | 246 | 239 | 6032  | Granitoid(<65%)    |
| 17DL05-1.1-09 | 0.31  | 0.001 | 2.9  | 0.00 | 0.28  | 0.73  | 0.30 | 5.3  | 1.9  | 27.2  | 10.9  | 54.4  | 11.7  | 121  | 22.6  | 9445  | 0.40 | 331  | 151 | 236 | 3703  | Dolerite           |
| 17DL05-1.1-10 | 2.19  | 0.022 | 11.1 | 0.06 | 1.15  | 2.75  | 0.20 | 20.5 | 7.8  | 110.1 | 43.2  | 213.9 | 44.1  | 465  | 80.8  | 11084 | 1.13 | 216  | 143 | 161 | 3501  | Granitoid(<65%)    |
| 17DL05-1.1-11 | 2.08  | 0.000 | 18.3 | 0.03 | 0.78  | 1.98  | 0.35 | 11.0 | 4.3  | 59.6  | 23.9  | 119.8 | 25.8  | 276  | 48.5  | 9997  | 0.96 | 164  | 105 | 110 | 2578  | Dolerite           |
| 17DL05-1.1-12 | 3.70  | 0.643 | 27.4 | 0.23 | 2.10  | 2.40  | 0.27 | 16.6 | 6.5  | 83.8  | 33.2  | 161.7 | 34.2  | 369  | 62.8  | 11528 | 1.93 | 247  | 227 | 259 | 5558  | Granitoid(<65%)    |
| 17DL05-1.1-13 | 1.85  | 0.020 | 17.1 | 0.05 | 1.06  | 2.13  | 0.28 | 14.7 | 5.2  | 66.1  | 25.2  | 122.8 | 26.2  | 283  | 46.4  | 10817 | 1.35 | 219  | 196 | 221 | 4804  | Granitoid(<65%)    |
| 17DL05-1.1-14 | 0.68  | 0.079 | 18.2 | 0.48 | 6.31  | 9.76  | 2.98 | 34.7 | 9.2  | 100.9 | 33.9  | 146.8 | 29.9  | 314  | 51.7  | 8025  | 0.35 | 259  | 106 | 90  | 2590  | Dolerite           |
| 17DL05-1.1-15 | 1.90  | 0.016 | 13.4 | 0.12 | 2.11  | 5.11  | 0.36 | 25.2 | 7.3  | 75.7  | 23.5  | 97.3  | 18.4  | 183  | 29.4  | 13515 | 1.25 | 1284 | 601 | 227 | 14733 | Granitoid(<65%)    |
| 17DL05-1.1-16 | 0.51  | 0.067 | 35.3 | 0.30 | 4.41  | 4.88  | 1.70 | 15.6 | 4.0  | 43.2  | 16.0  | 84.4  | 18.8  | 219  | 41.4  | 7380  | 0.16 | 344  | 339 | 202 | 8308  | basalt             |
| 17DL05-1.1-17 | 0.79  | 0.033 | 2.9  | 0.12 | 2.34  | 6.80  | 0.27 | 47.0 | 19.2 | 257.6 | 96.3  | 455.1 | 94.0  | 963  | 151.4 | 11228 | 0.83 | 459  | 180 | 541 | 4426  | Granitoid(<70-75%) |
| 17DL05-1.1-18 | 3.02  | 0.054 | 27.2 | 0.05 | 0.89  | 2.19  | 0.28 | 14.0 | 5.9  | 87.7  | 36.3  | 181.2 | 41.5  | 464  | 80.0  | 11567 | 2.47 | 236  | 150 | 190 | 3673  | Granitoid(<65%)    |
| 17DL05-1.1-19 | 1.04  | 0.000 | 0.7  | 0.03 | 0.80  | 3.41  | 0.08 | 27.6 | 11.2 | 148.3 | 52.1  | 231.1 | 46.8  | 460  | 72.2  | 11561 | 0.43 | 180  | 43  | 291 | 1065  | Granitoid(<65%)    |
| 17DL05-1.1-20 | 1.35  | 0.017 | 11.8 | 0.05 | 0.77  | 1.78  | 0.35 | 12.2 | 4.6  | 60.2  | 24.2  | 116.8 | 24.9  | 273  | 44.2  | 10054 | 0.93 | 121  | 80  | 86  | 1961  | Dolerite           |
| 17DL05-1.1-21 | 1.64  | 0.015 | 6.3  | 0.21 | 2.72  | 5.78  | 0.26 | 25.4 | 7.4  | 87.2  | 30.2  | 134.9 | 25.7  | 257  | 39.8  | 9589  | 0.87 | 234  | 99  | 148 | 2418  | Dolerite           |
| 17DL05-1.1-22 | 1.50  | 0.125 | 41.5 | 1.34 | 19.71 | 22.04 | 3.73 | 64.8 | 16.2 | 160.9 | 47.7  | 189.7 | 34.7  | 335  | 49.3  | 8836  | 0.75 | 707  | 454 | 295 | 11134 | Dolerite           |
| 17DL05-1.1-23 | 3.30  | 0.000 | 28.0 | 0.07 | 0.95  | 2.72  | 0.24 | 16.2 | 5.9  | 80.7  | 31.0  | 155.7 | 34.6  | 378  | 63.4  | 10757 | 1.71 | 234  | 230 | 186 | 5648  | Granitoid(<65%)    |
| 17DL05-1.1-24 | 1.53  | 0.016 | 7.0  | 0.00 | 0.41  | 1.08  | 0.04 | 9.5  | 3.7  | 54.0  | 21.8  | 112.5 | 24.6  | 267  | 44.3  | 12163 | 1.84 | 309  | 132 | 386 | 3240  | Granitoid(<65%)    |
| 17DL05-1.1-25 | 3.20  | 0.000 | 16.4 | 0.06 | 1.16  | 2.46  | 0.17 | 13.3 | 4.2  | 47.2  | 18.1  | 83.6  | 17.0  | 178  | 28.5  | 9939  | 1.25 | 438  | 180 | 196 | 4415  | Dolerite           |
| 17DL05-1.1-26 | 1.33  | 0.029 | 13.3 | 0.05 | 0.67  | 1.40  | 0.37 | 7.7  | 2.7  | 35.3  | 13.4  | 71.7  | 16.9  | 201  | 35.1  | 10247 | 0.77 | 133  | 90  | 70  | 2208  | Granitoid(<65%)    |
| 17DL05-1.1-27 | 3.07  | 0.000 | 28.9 | 0.04 | 0.84  | 2.47  | 0.56 | 16.3 | 6.2  | 85.3  | 32.5  | 164.9 | 35.5  | 394  | 65.9  | 10179 | 1.33 | 253  | 165 | 167 | 4045  | Granitoid(<65%)    |
| 17DL05-1.1-28 | 2.14  | 0.037 | 14.4 | 0.05 | 0.79  | 2.04  | 0.22 | 9.6  | 3.9  | 53.5  | 19.9  | 96.7  | 21.1  | 235  | 38.2  | 10390 | 1.49 | 156  | 138 | 161 | 3387  | Granitoid(<65%)    |
| 17DL05-1.1-29 | 1.09  | 0.000 | 19.1 | 0.05 | 0.59  | 1.82  | 0.52 | 12.8 | 4.2  | 54.9  | 21.9  | 105.3 | 22.5  | 252  | 43.3  | 10147 | 0.56 | 151  | 128 | 97  | 3145  | Dolerite           |
| 17DL05-1.1-30 | 0.61  | 0.000 | 2.2  | 0.03 | 0.57  | 2.45  | 0.15 | 19.4 | 7.8  | 112.5 | 45.4  | 231.7 | 49.9  | 519  | 85.4  | 11341 | 0.77 | 156  | 61  | 211 | 1496  | Granitoid(<70-75%) |
| 17DL05-1.1-31 | 1.47  | 0.000 | 7.0  | 0.01 | 0.70  | 1.79  | 0.30 | 13.6 | 4.6  | 62.5  | 23.3  | 113.4 | 22.9  | 248  | 41.2  | 9989  | 0.70 | 182  | 94  | 141 | 2294  | Dolerite           |
| 17DL05-1.1-32 | 9.82  | 0.000 | 0.1  | 0.00 | 0.04  | 0.00  | 0.11 | 1.8  | 0.9  | 23.0  | 14.5  | 101.5 | 27.6  | 367  | 75.1  | 14564 | 3.91 | 93   | 3   | 464 | 62    | Granitoid(<65%)    |
| 17DL05-1.1-33 | 13.57 | 0.000 | 15.6 | 0.06 | 1.12  | 2.54  | 0.01 | 17.8 | 7.7  | 106.6 | 41.4  | 209.0 | 45.1  | 465  | 72.0  | 11049 | 6.60 | 608  | 432 | 732 | 10587 | Granitoid(<65%)    |
| 17DL05-1.1-34 | 1.99  | 0.024 | 10.9 | 0.07 | 1.28  | 2.62  | 0.33 | 20.4 | 6.6  | 91.0  | 32.8  | 159.1 | 31.1  | 324  | 49.8  | 10036 | 0.85 | 293  | 164 | 191 | 4031  | Dolerite           |
| 17DL05-1.1-35 | 0.79  | 0.032 | 27.4 | 0.18 | 3.51  | 6.46  | 2.85 | 29.5 | 7.6  | 73.1  | 21.1  | 89.0  | 17.3  | 185  | 27.7  | 9235  | 0.54 | 492  | 507 | 206 | 12434 | Dolerite           |
| 17DL05-1.1-36 | 1.62  | 0.008 | 11.0 | 0.03 | 0.62  | 1.32  | 0.06 | 9.9  | 3.9  | 53.4  | 20.3  | 100.7 | 21.4  | 233  | 38.0  | 10620 | 1.16 | 273  | 150 | 225 | 3685  | Granitoid(<65%)    |
| 17DL05-1.1-37 | 2.53  | 0.136 | 24.0 | 0.12 | 0.90  | 1.96  | 0.17 | 9.5  | 3.7  | 52.9  | 19.9  | 104.2 | 23.2  | 263  | 43.9  | 10385 | 1.44 | 135  | 123 | 113 | 3014  | Granitoid(<65%)    |
| 17DL05-1.1-38 | 2.18  | 0.000 | 10.3 | 0.17 | 3.14  | 6.68  | 0.43 | 34.9 | 11.3 | 141.1 | 47.8  | 220.2 | 42.5  | 421  | 63.8  | 9737  | 1.30 | 307  | 227 | 168 | 5566  | Dolerite           |
| 17DL05-1.1-39 | 0.22  | 0.021 | 8.4  | 0.19 | 3.68  | 6.51  | 1.09 | 35.7 | 13.4 | 178.8 | 69.6  | 340.0 | 69.0  | 711  | 116.3 | 8750  | 0.39 | 608  | 355 | 365 | 8697  | Dolerite           |
| 17DL05-1.1-40 | 1.64  | 0.115 | 15.0 | 0.06 | 0.73  | 1.98  | 0.25 | 10.3 | 4.2  | 54.9  | 22.2  | 107.9 | 23.3  | 253  | 42.6  | 10075 | 1.20 | 104  | 98  | 78  | 2397  | Dolerite           |
| 17DL05-1.1-41 | 3.74  | 0.000 | 18.4 | 0.03 | 0.70  | 2.29  | 0.24 | 13.3 | 5.3  | 70.6  | 27.1  | 139.3 | 28.5  | 314  | 52.4  | 10192 | 1.92 | 219  | 133 | 149 | 3258  | Granitoid(<65%)    |
| 17DL05-1.1-42 | 0.14  | 0.000 | 6.5  | 0.16 | 3.38  | 5.02  | 1.05 | 24.0 | 6.9  | 81.9  | 28.6  | 125.9 | 23.6  | 247  | 39.0  | 7349  | 0.32 | 343  | 205 | 146 | 5036  | basalt             |
| 17DL05-1.1-43 | 2.40  | 0.000 | 20.0 | 0.03 | 0.74  | 2.21  | 0.26 | 13.7 | 4.9  | 65.5  | 25.2  | 130.0 | 28.2  | 308  | 52.3  | 10327 | 1.12 | 278  | 165 | 192 | 4049  | Granitoid(<65%)    |
| 17DL05-1.1-44 | 0.66  | 0.012 | 6.3  | 0.12 | 2.06  | 4.83  | 0.51 | 30.9 | 9.8  | 116.6 | 41.3  | 187.8 | 37.3  | 384  | 62.7  | 10244 | 0.41 | 242  | 143 | 112 | 3513  | Granitoid(<65%)    |



|               |      |       |      |      |      |      |      |      |      |       |      |       |       |      |       |       |      |     |     |      |       |                    |
|---------------|------|-------|------|------|------|------|------|------|------|-------|------|-------|-------|------|-------|-------|------|-----|-----|------|-------|--------------------|
| 17DL05-1.1-45 | 2.98 | 0.001 | 34.6 | 0.10 | 1.88 | 4.13 | 0.74 | 25.9 | 8.2  | 105.8 | 38.9 | 190.7 | 40.0  | 428  | 69.8  | 10152 | 1.44 | 455 | 315 | 183  | 7721  | Granitoid(<65%)    |
| 17DL05-1.1-46 | 1.20 | 0.004 | 6.2  | 0.05 | 1.15 | 2.23 | 0.40 | 15.6 | 5.5  | 79.6  | 30.0 | 146.2 | 30.3  | 335  | 57.1  | 8672  | 0.71 | 131 | 83  | 97   | 2033  | Dolerite           |
| 17DL05-1.1-47 | 0.89 | 0.005 | 12.9 | 0.09 | 1.60 | 3.71 | 0.56 | 18.9 | 5.9  | 60.9  | 18.6 | 75.9  | 13.2  | 126  | 19.9  | 9670  | 0.62 | 229 | 76  | 129  | 1865  | carbonate          |
| 17DL05-1.1-48 | 0.65 | 0.005 | 7.4  | 0.04 | 0.47 | 1.08 | 0.67 | 6.5  | 2.4  | 33.1  | 13.4 | 78.7  | 19.3  | 254  | 54.3  | 9236  | 0.58 | 152 | 90  | 184  | 2218  | Dolerite           |
| 17DL05-1.1-49 | 2.36 | 0.025 | 16.7 | 0.20 | 2.73 | 5.01 | 0.41 | 24.9 | 8.1  | 103.5 | 38.3 | 182.6 | 37.3  | 369  | 64.8  | 10526 | 1.67 | 328 | 296 | 274  | 7257  | Granitoid(<65%)    |
| 17DL05-1.1-50 | 2.17 | 0.025 | 2.9  | 0.00 | 0.11 | 1.45 | 0.80 | 9.8  | 2.4  | 21.3  | 5.0  | 16.5  | 2.5   | 24   | 3.4   | 11485 | 3.84 | 221 | 9   | 1034 | 211   | carbonate          |
| 17DL05-1.1-51 | 2.72 | 0.033 | 21.1 | 0.04 | 1.21 | 2.55 | 0.25 | 18.1 | 5.7  | 74.9  | 28.3 | 133.7 | 27.7  | 289  | 47.8  | 10559 | 1.62 | 367 | 223 | 262  | 5475  | Granitoid(<65%)    |
| 17DL05-1.1-53 | 1.22 | 0.034 | 36.6 | 0.14 | 2.59 | 3.25 | 1.65 | 14.3 | 3.7  | 40.6  | 12.7 | 54.0  | 9.7   | 94   | 14.7  | 8575  | 0.79 | 451 | 447 | 237  | 10957 | carbonate          |
| 17DL05-1.1-55 | 3.13 | 0.015 | 17.0 | 0.10 | 1.63 | 3.45 | 0.36 | 18.5 | 7.0  | 88.9  | 32.2 | 151.3 | 31.3  | 331  | 54.4  | 10486 | 1.57 | 231 | 213 | 202  | 5218  | Granitoid(<65%)    |
| 17DL05-1.1-56 | 3.29 | 0.023 | 20.1 | 0.06 | 0.71 | 2.07 | 0.21 | 14.9 | 6.1  | 85.3  | 34.8 | 177.4 | 39.4  | 439  | 80.8  | 12155 | 2.10 | 187 | 109 | 177  | 2679  | Granitoid(<65%)    |
| 17DL05-1.1-57 | 1.83 | 0.038 | 26.7 | 0.10 | 2.56 | 5.05 | 1.30 | 29.6 | 9.9  | 117.7 | 43.5 | 203.2 | 40.9  | 427  | 75.0  | 8897  | 0.91 | 130 | 93  | 66   | 2287  | Dolerite           |
| 17DL05-1.1-58 | 3.40 | 0.005 | 23.0 | 0.06 | 1.45 | 2.98 | 0.19 | 16.1 | 6.0  | 81.9  | 32.8 | 172.8 | 36.8  | 411  | 76.2  | 10675 | 1.55 | 585 | 318 | 439  | 7807  | Granitoid(<65%)    |
| 17DL05-1.1-59 | 2.76 | 0.001 | 10.1 | 0.05 | 1.31 | 3.78 | 0.46 | 30.3 | 14.2 | 213.6 | 89.0 | 465.0 | 101.7 | 1119 | 200.6 | 11753 | 1.34 | 137 | 79  | 160  | 1928  | Granitoid(<70-75%) |
| 17DL05-1.1-60 | 1.28 | 0.000 | 9.2  | 0.14 | 1.35 | 3.30 | 0.33 | 14.7 | 4.1  | 47.6  | 16.2 | 71.2  | 13.4  | 135  | 22.6  | 10422 | 0.49 | 149 | 66  | 32   | 1622  | Granitoid(<65%)    |
| 17DL05-1.1-61 | 1.83 | 0.000 | 16.4 | 0.04 | 0.77 | 1.62 | 0.37 | 12.2 | 4.8  | 59.3  | 25.1 | 125.9 | 27.0  | 299  | 54.6  | 10373 | 0.91 | 156 | 103 | 117  | 2531  | Granitoid(<65%)    |
| 17DL05-1.1-62 | 1.36 | 0.020 | 15.8 | 0.00 | 0.52 | 1.63 | 0.27 | 9.5  | 3.6  | 50.0  | 20.7 | 104.4 | 22.4  | 247  | 44.4  | 10752 | 0.94 | 129 | 82  | 95   | 2017  | Granitoid(<65%)    |
| 17DL05-1.1-63 | 0.34 | 0.001 | 2.7  | 0.00 | 0.06 | 0.26 | 0.26 | 3.2  | 1.0  | 14.4  | 5.7  | 28.8  | 6.8   | 77   | 14.5  | 11759 | 0.79 | 110 | 12  | 507  | 296   | carbonate          |
| 17DL05-1.1-64 | 0.49 | 0.032 | 10.6 | 0.25 | 2.97 | 3.56 | 1.28 | 11.2 | 3.6  | 45.7  | 18.7 | 96.8  | 22.6  | 276  | 57.5  | 10037 | 0.40 | 279 | 198 | 160  | 4859  | Dolerite           |
| 17DL05-1.1-65 | 6.96 | 0.015 | 0.3  | 0.00 | 0.05 | 0.08 | 0.11 | 0.9  | 0.7  | 17.8  | 9.9  | 61.0  | 13.8  | 145  | 22.6  | 12839 | 9.59 | 32  | 1   | 160  | 33    | Granitoid(<65%)    |
| 17DL05-1.1-66 | 0.79 | 0.000 | 14.3 | 0.05 | 1.97 | 4.29 | 1.37 | 24.4 | 8.1  | 105.1 | 39.0 | 185.9 | 37.6  | 393  | 68.2  | 9982  | 0.53 | 129 | 88  | 75   | 2164  | Dolerite           |
| 17DL05-1.1-67 | 1.64 | 0.000 | 31.2 | 0.04 | 1.17 | 2.61 | 0.73 | 17.2 | 6.0  | 81.0  | 33.1 | 169.4 | 39.8  | 454  | 82.7  | 10807 | 1.58 | 351 | 243 | 231  | 5954  | Granitoid(<65%)    |
| 17DL05-1.1-68 | 5.92 | 0.014 | 12.5 | 0.05 | 1.17 | 2.00 | 0.04 | 13.7 | 4.1  | 52.9  | 19.1 | 89.4  | 18.3  | 181  | 30.4  | 11630 | 2.18 | 244 | 156 | 160  | 3822  | Granitoid(<65%)    |
| 17DL05-1.1-69 | 2.56 | 0.000 | 20.9 | 0.01 | 0.65 | 2.09 | 0.33 | 13.2 | 5.4  | 69.9  | 27.3 | 131.4 | 29.1  | 314  | 55.0  | 10930 | 1.03 | 171 | 119 | 123  | 2930  | Granitoid(<65%)    |
| 17DL05-1.1-70 | 0.87 | 0.000 | 16.2 | 0.07 | 1.57 | 2.19 | 0.44 | 15.2 | 4.8  | 62.6  | 23.5 | 114.5 | 25.3  | 272  | 49.3  | 9549  | 0.57 | 255 | 175 | 129  | 4296  | Dolerite           |
| 17DL05-1.1-71 | 1.33 | 0.034 | 7.0  | 0.03 | 0.44 | 0.77 | 0.12 | 3.1  | 1.2  | 15.0  | 5.8  | 31.2  | 7.2   | 91   | 17.2  | 11778 | 1.14 | 343 | 70  | 468  | 1720  | carbonate          |
| 17DL05-1.1-72 | 2.25 | 0.001 | 12.1 | 0.05 | 0.95 | 2.56 | 0.33 | 14.5 | 5.1  | 67.6  | 25.0 | 116.6 | 24.8  | 266  | 44.9  | 10913 | 1.22 | 115 | 107 | 116  | 2633  | Granitoid(<65%)    |
| 17DL05-1.1-73 | 2.04 | 0.006 | 2.7  | 0.09 | 1.89 | 6.63 | 0.15 | 34.2 | 10.9 | 111.9 | 32.0 | 126.3 | 21.1  | 189  | 26.9  | 13103 | 0.92 | 251 | 108 | 347  | 2648  | Granitoid(<65%)    |
| 17DL05-1.1-74 | 1.10 | 0.027 | 17.8 | 0.03 | 0.93 | 1.67 | 0.48 | 6.6  | 2.1  | 29.0  | 10.9 | 55.0  | 12.7  | 153  | 29.0  | 8553  | 0.58 | 134 | 79  | 93   | 1930  | Dolerite           |
| 17DL05-1.1-75 | 1.07 | 0.030 | 17.4 | 0.09 | 1.22 | 2.45 | 0.61 | 12.6 | 4.3  | 50.4  | 19.0 | 93.9  | 20.8  | 235  | 40.7  | 9569  | 0.53 | 196 | 146 | 85   | 3579  | Dolerite           |
| 17DL05-1.1-76 | 1.66 | 0.041 | 6.0  | 0.09 | 1.47 | 4.84 | 0.26 | 27.8 | 10.1 | 127.5 | 47.1 | 221.5 | 43.2  | 451  | 73.2  | 11724 | 1.35 | 261 | 139 | 224  | 3401  | Granitoid(<65%)    |
| 17DL05-1.1-77 | 0.44 | 0.048 | 1.9  | 0.13 | 2.02 | 2.05 | 0.55 | 8.5  | 2.6  | 34.9  | 13.1 | 67.7  | 15.6  | 184  | 36.2  | 9145  | 0.16 | 200 | 86  | 173  | 2118  | Dolerite           |
| 17DL05-1.1-78 | 4.01 | 0.049 | 29.5 | 0.01 | 0.77 | 1.62 | 0.52 | 11.5 | 4.4  | 60.2  | 24.9 | 141.6 | 32.3  | 380  | 72.9  | 11200 | 1.38 | 306 | 202 | 201  | 4956  | Granitoid(<65%)    |
| 17DL05-1.1-79 | 6.73 | 0.035 | 17.1 | 0.04 | 1.19 | 2.04 | 0.05 | 11.3 | 3.9  | 53.7  | 19.9 | 104.2 | 23.7  | 265  | 47.0  | 12547 | 2.66 | 462 | 274 | 335  | 6717  | Granitoid(<65%)    |
| 17DL05-1.1-80 | 1.72 | 0.033 | 20.5 | 0.08 | 1.43 | 2.81 | 0.25 | 15.4 | 4.9  | 55.4  | 18.7 | 87.8  | 18.9  | 209  | 35.8  | 11518 | 0.99 | 506 | 248 | 363  | 6083  | Granitoid(<65%)    |
| 17DL05-1.1-81 | 0.89 | 0.024 | 16.1 | 0.05 | 1.06 | 2.94 | 0.62 | 21.9 | 7.6  | 99.7  | 37.9 | 180.7 | 37.5  | 397  | 67.7  | 10938 | 0.48 | 337 | 217 | 203  | 5332  | Granitoid(<65%)    |
| 17DL05-1.1-82 | 2.08 | 0.006 | 16.9 | 0.11 | 2.39 | 5.95 | 0.77 | 33.5 | 11.2 | 140.8 | 52.0 | 241.2 | 47.0  | 477  | 80.7  | 10453 | 1.30 | 277 | 192 | 155  | 4713  | Granitoid(<65%)    |
| 17DL05-1.1-83 | 3.25 | 0.000 | 17.5 | 0.04 | 1.22 | 2.76 | 0.36 | 16.0 | 5.7  | 74.1  | 27.4 | 134.6 | 28.7  | 303  | 50.2  | 11211 | 1.77 | 232 | 216 | 231  | 5306  | Granitoid(<65%)    |
| 17DL05-1.1-84 | 2.79 | 0.016 | 20.7 | 0.09 | 2.24 | 4.82 | 0.25 | 22.7 | 7.5  | 87.9  | 30.5 | 134.7 | 26.2  | 269  | 43.7  | 10843 | 1.49 | 409 | 286 | 166  | 7011  | Granitoid(<65%)    |
| 17DL05-1.1-85 | 3.02 | 0.006 | 26.4 | 0.04 | 0.92 | 1.99 | 0.20 | 13.2 | 4.6  | 61.1  | 24.3 | 124.3 | 27.2  | 302  | 51.6  | 10825 | 1.43 | 140 | 141 | 115  | 3459  | Granitoid(<65%)    |
| 17DL05-1.1-86 | 1.14 | 0.057 | 9.7  | 0.06 | 0.67 | 2.17 | 0.34 | 14.9 | 5.5  | 73.5  | 28.8 | 137.4 | 28.7  | 307  | 51.9  | 10122 | 0.68 | 131 | 88  | 107  | 2149  | Dolerite           |
| 17DL05-1.1-87 | 1.95 | 0.005 | 18.6 | 0.05 | 0.89 | 1.37 | 0.15 | 9.0  | 3.7  | 48.4  | 19.5 | 99.8  | 22.5  | 258  | 44.8  | 11037 | 1.62 | 151 | 144 | 157  | 3531  | Granitoid(<65%)    |
| 17DL05-1.1-88 | 2.23 | 0.006 | 16.5 | 0.12 | 1.95 | 4.44 | 0.62 | 28.0 | 9.9  | 120.4 | 44.1 | 208.8 | 42.1  | 436  | 71.9  | 10806 | 1.10 | 236 | 223 | 197  | 5475  | Granitoid(<65%)    |

|                |       |       |      |      |      |       |      |      |      |       |       |       |       |      |       |       |       |     |     |     |       |                    |
|----------------|-------|-------|------|------|------|-------|------|------|------|-------|-------|-------|-------|------|-------|-------|-------|-----|-----|-----|-------|--------------------|
| 17DL05-1.1-89  | 1.98  | 0.005 | 16.8 | 0.01 | 0.74 | 1.73  | 0.25 | 11.3 | 4.2  | 62.2  | 24.2  | 122.8 | 25.9  | 294  | 49.6  | 10472 | 0.83  | 138 | 95  | 100 | 2329  | Granitoid(<65%)    |
| 17DL05-1.1-90  | 0.33  | 0.015 | 2.1  | 0.03 | 1.10 | 2.59  | 0.09 | 23.4 | 8.0  | 112.5 | 40.6  | 191.6 | 37.4  | 385  | 61.9  | 11932 | 0.66  | 230 | 89  | 305 | 2186  | Granitoid(<65%)    |
| 17DL05-1.1-91  | 1.10  | 0.015 | 26.3 | 0.03 | 1.13 | 2.86  | 0.73 | 14.9 | 3.9  | 49.6  | 17.8  | 88.7  | 18.9  | 210  | 37.7  | 10292 | 0.69  | 347 | 141 | 126 | 3459  | Granitoid(<65%)    |
| 17DL05-1.1-92  | 4.91  | 0.063 | 52.0 | 0.11 | 1.21 | 2.15  | 0.38 | 10.3 | 3.9  | 57.1  | 22.7  | 123.1 | 29.4  | 353  | 63.3  | 11776 | 2.84  | 519 | 489 | 331 | 11980 | Granitoid(<65%)    |
| 17DL05-1.1-93  | 1.61  | 0.103 | 20.0 | 0.12 | 1.60 | 3.70  | 0.70 | 20.5 | 7.7  | 106.6 | 41.7  | 216.5 | 46.4  | 518  | 90.9  | 11660 | 1.25  | 187 | 124 | 143 | 3044  | Granitoid(<70-75%) |
| 17DL05-1.1-94  | 2.60  | 0.039 | 22.8 | 0.06 | 1.20 | 2.30  | 0.38 | 14.5 | 5.0  | 64.2  | 25.1  | 116.5 | 24.4  | 281  | 47.3  | 10876 | 1.35  | 168 | 168 | 133 | 4112  | Granitoid(<65%)    |
| 17DL05-1.1-95  | 2.61  | 0.000 | 21.3 | 0.01 | 0.61 | 1.87  | 0.38 | 14.0 | 5.1  | 69.8  | 27.1  | 136.3 | 29.9  | 318  | 54.8  | 10251 | 1.07  | 185 | 126 | 129 | 3084  | Granitoid(<65%)    |
| 17DL05-1.1-96  | 1.63  | 0.013 | 7.5  | 0.05 | 1.08 | 2.80  | 0.65 | 17.5 | 6.7  | 100.0 | 41.3  | 218.3 | 45.7  | 505  | 87.9  | 7723  | 0.88  | 257 | 143 | 224 | 3518  | basalt             |
| 17DL05-1.1-97  | 2.96  | 0.000 | 24.5 | 0.04 | 0.94 | 2.05  | 0.28 | 12.1 | 4.6  | 61.2  | 23.7  | 118.0 | 25.1  | 275  | 47.1  | 10578 | 1.59  | 288 | 244 | 341 | 5989  | Granitoid(<65%)    |
| 17DL05-1.1-98  | 1.15  | 0.025 | 19.1 | 0.12 | 2.23 | 3.83  | 1.03 | 17.2 | 5.0  | 59.6  | 23.1  | 114.3 | 24.7  | 272  | 49.3  | 7624  | 0.46  | 276 | 108 | 105 | 2648  | basalt             |
| 17DL05-1.1-99  | 0.76  | 0.032 | 15.1 | 0.21 | 3.56 | 6.28  | 1.31 | 30.0 | 9.4  | 104.0 | 37.2  | 168.7 | 32.3  | 328  | 54.5  | 9041  | 0.38  | 204 | 125 | 120 | 3069  | Dolerite           |
| 17DL05-1.1-100 | 1.12  | 0.000 | 21.8 | 0.05 | 0.99 | 2.22  | 0.54 | 13.0 | 4.1  | 48.8  | 18.5  | 87.6  | 18.4  | 203  | 34.8  | 10202 | 0.86  | 194 | 137 | 137 | 3363  | Granitoid(<65%)    |
| 17DL07-1-01    | 3.58  | 0.009 | 15.6 | 0.05 | 0.73 | 1.35  | 0.13 | 7.4  | 2.9  | 42.4  | 16.8  | 88.1  | 20.2  | 234  | 36.3  | 9880  | 2.55  | 281 | 128 | 441 | 2960  | Dolerite           |
| 17DL07-1-02    | 1.67  | 0.011 | 1.6  | 0.04 | 1.04 | 3.31  | 0.10 | 26.6 | 11.5 | 164.3 | 60.4  | 299.7 | 63.5  | 721  | 103.4 | 12197 | 1.35  | 217 | 83  | 362 | 1934  | Granitoid(<70-75%) |
| 17DL07-1-03    | 3.73  | 0.000 | 15.8 | 0.04 | 0.95 | 3.09  | 0.40 | 18.9 | 7.0  | 101.9 | 39.2  | 203.8 | 44.9  | 520  | 83.0  | 9214  | 2.19  | 190 | 154 | 263 | 3576  | Dolerite           |
| 17DL07-1-04    | 3.44  | 0.004 | 15.2 | 0.07 | 1.40 | 2.94  | 0.38 | 14.9 | 5.5  | 70.7  | 25.6  | 121.3 | 25.7  | 280  | 42.3  | 8795  | 1.59  | 137 | 136 | 135 | 3163  | Dolerite           |
| 17DL07-1-05    | 2.09  | 0.001 | 13.7 | 0.04 | 0.82 | 1.86  | 0.39 | 12.6 | 5.1  | 67.4  | 26.0  | 127.3 | 28.1  | 319  | 49.1  | 8800  | 1.16  | 176 | 101 | 128 | 2348  | Dolerite           |
| 17DL07-1-06    | 6.08  | 0.109 | 68.1 | 0.18 | 2.90 | 6.38  | 1.20 | 33.2 | 12.1 | 160.6 | 58.9  | 289.5 | 61.0  | 679  | 103.2 | 9286  | 2.26  | 388 | 329 | 271 | 7636  | Dolerite           |
| 17DL07-1-07    | 1.84  | 0.003 | 13.3 | 0.02 | 0.43 | 1.43  | 0.09 | 7.5  | 3.1  | 41.8  | 16.3  | 84.1  | 18.3  | 204  | 31.5  | 10083 | 1.36  | 192 | 119 | 164 | 2757  | Dolerite           |
| 17DL07-1-08    | 1.17  | 0.006 | 3.4  | 0.09 | 1.71 | 4.57  | 0.43 | 28.8 | 11.3 | 161.5 | 61.5  | 300.1 | 63.6  | 676  | 97.0  | 10036 | 0.76  | 179 | 102 | 173 | 2377  | Dolerite           |
| 17DL07-1-09    | 2.39  | 0.090 | 8.0  | 0.31 | 4.29 | 7.02  | 1.78 | 29.8 | 9.7  | 112.5 | 39.0  | 179.3 | 37.3  | 404  | 58.9  | 9445  | 1.19  | 457 | 205 | 196 | 4757  | Dolerite           |
| 17DL07-1-10    | 3.86  | 0.003 | 29.6 | 0.05 | 0.79 | 2.27  | 0.29 | 15.6 | 6.3  | 84.6  | 32.9  | 166.8 | 37.0  | 418  | 66.2  | 9821  | 1.99  | 337 | 231 | 263 | 5357  | Dolerite           |
| 17DL07-1-11    | 2.42  | 0.000 | 20.9 | 0.04 | 0.96 | 2.24  | 0.29 | 14.7 | 5.5  | 77.0  | 29.6  | 146.2 | 32.7  | 366  | 56.8  | 9537  | 1.40  | 213 | 148 | 159 | 3430  | Dolerite           |
| 17DL07-1-12    | 3.73  | 0.004 | 16.0 | 0.04 | 1.25 | 3.41  | 0.19 | 21.2 | 8.4  | 112.5 | 41.7  | 197.1 | 41.9  | 442  | 65.4  | 11152 | 2.12  | 324 | 313 | 297 | 7261  | Granitoid(<65%)    |
| 17DL07-1-13    | 2.76  | 0.107 | 48.2 | 0.24 | 4.18 | 6.94  | 1.92 | 26.1 | 8.9  | 105.5 | 35.1  | 164.2 | 34.1  | 368  | 56.8  | 7911  | 1.02  | 111 | 81  | 106 | 1884  | basalt             |
| 17DL07-1-14    | 50.84 | 0.009 | 25.7 | 0.14 | 2.92 | 7.57  | 0.27 | 44.9 | 19.0 | 275.5 | 102.4 | 497.1 | 104.6 | 1050 | 140.4 | 10612 | 15.11 | 246 | 167 | 318 | 3885  | Granitoid(<70-75%) |
| 17DL07-1-15    | 1.35  | 0.013 | 36.9 | 0.04 | 0.77 | 1.73  | 0.66 | 8.6  | 2.7  | 35.4  | 14.1  | 72.6  | 17.9  | 222  | 38.2  | 10016 | 0.85  | 509 | 334 | 313 | 7740  | Dolerite           |
| 17DL07-1-16    | 2.02  | 0.026 | 11.8 | 0.12 | 2.24 | 4.18  | 0.58 | 21.0 | 7.1  | 88.2  | 30.0  | 138.7 | 28.7  | 307  | 45.5  | 9877  | 1.18  | 107 | 105 | 98  | 2428  | Dolerite           |
| 17DL07-1-17    | 1.33  | 0.067 | 6.6  | 0.36 | 5.82 | 9.51  | 1.11 | 43.5 | 14.0 | 170.7 | 57.7  | 257.3 | 52.1  | 533  | 76.6  | 9009  | 0.92  | 182 | 125 | 138 | 2895  | Dolerite           |
| 17DL07-1-18    | 1.78  | 0.016 | 23.2 | 0.24 | 3.92 | 6.41  | 1.29 | 28.1 | 8.4  | 98.9  | 34.2  | 155.7 | 32.8  | 349  | 54.3  | 9496  | 0.82  | 199 | 236 | 131 | 5478  | Dolerite           |
| 17DL07-1-19    | 1.10  | 0.000 | 11.6 | 0.11 | 2.11 | 4.52  | 0.59 | 22.2 | 7.2  | 87.9  | 29.6  | 144.7 | 31.6  | 345  | 54.3  | 9420  | 0.60  | 155 | 147 | 197 | 3416  | Dolerite           |
| 17DL07-1-20    | 2.25  | 0.015 | 22.1 | 0.05 | 0.91 | 2.10  | 0.38 | 15.5 | 5.8  | 80.6  | 30.7  | 153.5 | 33.2  | 371  | 59.0  | 9687  | 1.36  | 209 | 145 | 143 | 3356  | Dolerite           |
| 17DL07-1-21    | 5.32  | 0.018 | 37.1 | 0.05 | 1.40 | 3.55  | 0.52 | 22.6 | 8.7  | 123.8 | 47.7  | 237.4 | 53.3  | 599  | 92.9  | 10930 | 2.61  | 412 | 248 | 356 | 5747  | Granitoid(<70-75%) |
| 17DL07-1-23    | 2.40  | 0.006 | 27.7 | 0.05 | 1.23 | 3.77  | 0.46 | 23.1 | 9.6  | 129.6 | 49.9  | 247.8 | 54.4  | 605  | 94.8  | 11461 | 1.64  | 245 | 179 | 165 | 4160  | Granitoid(<70-75%) |
| 17DL07-1-25    | 1.74  | 0.017 | 23.8 | 0.07 | 1.81 | 4.12  | 0.85 | 22.5 | 7.5  | 100.1 | 37.7  | 188.4 | 41.5  | 479  | 78.4  | 9170  | 0.85  | 195 | 140 | 88  | 3251  | Dolerite           |
| 17DL07-1-26    | 0.63  | 0.000 | 2.8  | 0.05 | 1.10 | 3.20  | 0.23 | 22.5 | 8.7  | 120.2 | 46.4  | 223.7 | 47.3  | 523  | 79.7  | 11677 | 0.45  | 137 | 72  | 145 | 1668  | Granitoid(<70-75%) |
| 17DL07-1-27    | 0.59  | 0.029 | 16.9 | 0.61 | 9.60 | 13.70 | 1.94 | 42.6 | 9.9  | 93.9  | 26.4  | 113.3 | 22.7  | 241  | 35.7  | 9258  | 0.38  | 578 | 248 | 171 | 5761  | Dolerite           |
| 17DL07-1-28    | 1.27  | 0.000 | 30.1 | 0.04 | 1.52 | 2.91  | 1.15 | 15.0 | 5.6  | 73.3  | 28.2  | 143.8 | 32.8  | 392  | 66.7  | 9116  | 0.52  | 111 | 86  | 66  | 1997  | Dolerite           |
| 17DL07-1-29    | 18.26 | 0.000 | 15.5 | 0.07 | 1.58 | 3.88  | 0.15 | 22.1 | 8.9  | 116.5 | 43.0  | 199.6 | 39.8  | 397  | 53.5  | 9678  | 6.64  | 97  | 76  | 200 | 1753  | Dolerite           |
| 17DL07-1-30    | 1.51  | 0.000 | 4.1  | 0.16 | 3.09 | 7.04  | 1.32 | 39.8 | 14.4 | 187.5 | 69.0  | 318.4 | 62.4  | 652  | 96.0  | 9214  | 0.92  | 153 | 108 | 113 | 2502  | Dolerite           |
| 17DL07-1-31    | 0.94  | 0.017 | 1.0  | 0.05 | 1.59 | 4.51  | 0.07 | 33.0 | 13.9 | 179.0 | 59.7  | 260.9 | 51.7  | 525  | 75.5  | 11244 | 0.72  | 231 | 62  | 374 | 1435  | Granitoid(<70-75%) |
| 17DL07-1-32    | 2.15  | 0.205 | 41.6 | 0.30 | 4.86 | 6.77  | 1.63 | 25.0 | 7.1  | 80.2  | 27.0  | 121.5 | 24.7  | 270  | 40.8  | 9436  | 0.71  | 148 | 99  | 36  | 2303  | Dolerite           |

|             |      |       |      |      |      |       |      |       |      |       |       |        |       |      |       |       |      |     |     |     |       |                    |
|-------------|------|-------|------|------|------|-------|------|-------|------|-------|-------|--------|-------|------|-------|-------|------|-----|-----|-----|-------|--------------------|
| 17DL07-1-33 | 6.30 | 0.000 | 50.8 | 0.08 | 1.74 | 5.35  | 1.54 | 33.6  | 11.7 | 163.7 | 60.6  | 296.2  | 62.0  | 672  | 103.7 | 10323 | 2.73 | 420 | 253 | 202 | 5868  | Granitoid(<70-75%) |
| 17DL07-1-34 | 1.91 | 0.000 | 9.2  | 0.09 | 1.89 | 4.26  | 0.14 | 19.1  | 6.8  | 82.9  | 29.1  | 136.5  | 28.2  | 302  | 45.3  | 11474 | 1.20 | 336 | 206 | 263 | 4784  | Granitoid(<65%)    |
| 17DL07-1-35 | 2.10 | 0.010 | 13.1 | 0.07 | 1.69 | 4.14  | 0.47 | 26.4  | 9.4  | 124.2 | 46.9  | 226.7  | 49.1  | 538  | 82.7  | 10502 | 1.16 | 162 | 116 | 200 | 2688  | Granitoid(<70-75%) |
| 17DL07-1-36 | 2.34 | 0.011 | 19.1 | 0.03 | 0.57 | 1.42  | 0.17 | 10.1  | 4.0  | 59.3  | 23.3  | 121.0  | 27.7  | 316  | 51.3  | 11420 | 1.60 | 193 | 124 | 181 | 2877  | Granitoid(<65%)    |
| 17DL07-1-38 | 1.70 | 0.010 | 26.6 | 0.07 | 1.02 | 2.15  | 0.64 | 11.1  | 3.8  | 46.2  | 17.8  | 93.0   | 20.9  | 256  | 44.0  | 10137 | 1.20 | 544 | 335 | 360 | 7779  | Dolerite           |
| 17DL07-1-39 | 1.69 | 0.161 | 47.9 | 0.18 | 2.93 | 5.48  | 1.37 | 21.4  | 6.8  | 80.4  | 27.9  | 131.9  | 28.9  | 315  | 50.5  | 8884  | 0.92 | 296 | 288 | 168 | 6693  | Dolerite           |
| 17DL07-1-40 | 4.38 | 0.012 | 7.6  | 0.05 | 1.29 | 2.87  | 0.15 | 18.9  | 6.8  | 91.8  | 32.4  | 153.4  | 32.2  | 339  | 49.3  | 10606 | 1.90 | 102 | 76  | 125 | 1755  | Granitoid(<65%)    |
| 17DL07-1-41 | 0.64 | 0.004 | 15.1 | 0.05 | 1.01 | 1.82  | 0.25 | 7.1   | 2.2  | 24.2  | 8.4   | 36.0   | 7.6   | 82   | 12.5  | 10503 | 0.23 | 214 | 103 | 53  | 2386  | carbonate          |
| 17DL07-1-42 | 2.77 | 0.031 | 5.1  | 0.34 | 5.86 | 9.39  | 1.92 | 45.3  | 14.3 | 166.1 | 54.4  | 232.7  | 44.0  | 445  | 63.4  | 9507  | 1.48 | 75  | 51  | 58  | 1178  | Dolerite           |
| 17DL07-1-43 | 1.43 | 0.023 | 6.9  | 0.11 | 2.50 | 5.18  | 1.04 | 24.3  | 7.9  | 98.9  | 33.1  | 150.3  | 30.4  | 325  | 47.3  | 8275  | 0.72 | 198 | 135 | 204 | 3132  | Dolerite           |
| 17DL07-1-44 | 6.01 | 0.089 | 30.9 | 0.15 | 3.19 | 6.72  | 1.74 | 39.3  | 13.6 | 170.2 | 61.2  | 287.5  | 58.4  | 615  | 88.1  | 9637  | 2.50 | 883 | 672 | 543 | 15600 | Dolerite           |
| 17DL07-1-45 | 1.38 | 0.004 | 2.2  | 0.05 | 1.21 | 3.18  | 0.25 | 24.2  | 9.2  | 127.9 | 49.5  | 245.5  | 52.4  | 567  | 85.6  | 10870 | 1.05 | 262 | 118 | 294 | 2749  | Granitoid(<70-75%) |
| 17DL07-1-46 | 2.82 | 0.000 | 21.3 | 0.07 | 1.91 | 4.88  | 1.27 | 26.8  | 9.8  | 129.3 | 48.1  | 236.2  | 50.5  | 548  | 86.1  | 9259  | 1.31 | 189 | 137 | 124 | 3189  | Dolerite           |
| 17DL07-1-47 | 2.75 | 0.009 | 14.6 | 0.05 | 1.00 | 2.69  | 0.17 | 17.2  | 6.4  | 81.4  | 29.4  | 139.7  | 28.2  | 304  | 44.7  | 10619 | 1.58 | 354 | 234 | 281 | 5436  | Granitoid(<65%)    |
| 17DL07-1-48 | 7.91 | 0.000 | 69.9 | 0.33 | 7.67 | 20.87 | 5.11 | 126.8 | 48.5 | 660.6 | 242.3 | 1091.6 | 203.8 | 1808 | 204.5 | 6905  | 1.89 | 465 | 322 | 656 | 7480  | basalt             |
| 17DL07-1-49 | 1.39 | 0.009 | 20.8 | 0.04 | 0.68 | 1.98  | 0.45 | 9.2   | 2.8  | 40.5  | 15.1  | 76.4   | 17.1  | 201  | 34.0  | 9507  | 0.62 | 139 | 89  | 67  | 2063  | Dolerite           |
| 17DL07-1-50 | 2.72 | 0.011 | 25.3 | 0.06 | 1.08 | 2.90  | 0.76 | 16.8  | 6.2  | 79.9  | 29.4  | 142.2  | 30.0  | 332  | 50.7  | 9788  | 1.26 | 311 | 174 | 141 | 4030  | Dolerite           |
| 17DL07-1-51 | 1.37 | 0.013 | 26.2 | 0.16 | 2.81 | 5.82  | 1.23 | 27.4  | 9.7  | 122.2 | 45.6  | 224.6  | 49.4  | 569  | 89.2  | 9615  | 0.78 | 222 | 184 | 125 | 4280  | Dolerite           |
| 17DL07-1-52 | 9.63 | 0.197 | 79.5 | 0.12 | 1.36 | 2.76  | 0.42 | 16.5  | 6.9  | 104.5 | 45.6  | 262.6  | 62.6  | 737  | 123.8 | 9848  | 2.24 | 236 | 188 | 139 | 4372  | Dolerite           |
| 17DL07-1-53 | 0.70 | 0.063 | 12.7 | 0.30 | 4.77 | 7.66  | 1.63 | 33.7  | 11.5 | 146.3 | 54.0  | 257.1  | 52.2  | 547  | 83.7  | 9026  | 0.69 | 329 | 251 | 171 | 5819  | Dolerite           |
| 17DL07-1-54 | 1.59 | 0.016 | 10.9 | 0.14 | 2.36 | 5.12  | 0.56 | 26.5  | 9.2  | 114.3 | 39.2  | 183.1  | 36.6  | 389  | 56.9  | 9565  | 1.10 | 240 | 169 | 157 | 3910  | Dolerite           |
| 17DL07-1-55 | 1.86 | 0.000 | 13.7 | 0.05 | 1.09 | 2.42  | 0.35 | 14.1  | 4.9  | 62.4  | 23.1  | 109.7  | 22.4  | 257  | 38.1  | 10198 | 1.04 | 185 | 128 | 146 | 2978  | Granitoid(<65%)    |
| 17DL07-1-56 | 1.13 | 0.034 | 18.7 | 0.08 | 1.69 | 3.69  | 0.94 | 20.5  | 7.2  | 97.3  | 35.9  | 174.1  | 37.3  | 413  | 64.5  | 8858  | 0.59 | 124 | 98  | 75  | 2270  | Dolerite           |
| 17DL07-1-57 | 2.37 | 0.014 | 38.9 | 0.06 | 1.24 | 2.83  | 0.55 | 14.9  | 5.3  | 68.9  | 25.4  | 127.8  | 29.2  | 336  | 53.1  | 9609  | 1.63 | 253 | 155 | 241 | 3598  | Dolerite           |
| 17DL07-1-58 | 1.97 | 0.021 | 15.5 | 0.05 | 1.20 | 3.33  | 0.38 | 23.5  | 9.4  | 130.4 | 49.2  | 247.7  | 53.6  | 591  | 91.1  | 10779 | 1.25 | 229 | 158 | 155 | 3661  | Granitoid(<70-75%) |
| 17DL07-1-59 | 3.92 | 0.033 | 11.3 | 0.22 | 4.45 | 11.20 | 0.12 | 62.8  | 21.0 | 262.9 | 92.1  | 416.6  | 80.1  | 807  | 113.6 | 10458 | 2.10 | 316 | 266 | 539 | 6180  | Granitoid(<70-75%) |
| 17DL07-1-60 | 2.50 | 0.000 | 40.5 | 0.07 | 1.42 | 3.49  | 0.82 | 19.3  | 6.8  | 93.8  | 35.3  | 175.7  | 38.5  | 441  | 69.1  | 10106 | 1.22 | 103 | 101 | 94  | 2347  | Dolerite           |
| 17DL07-1-61 | 2.70 | 0.033 | 29.3 | 0.05 | 1.14 | 2.95  | 0.65 | 16.4  | 6.4  | 82.0  | 31.3  | 156.9  | 35.0  | 397  | 63.4  | 9776  | 1.34 | 133 | 98  | 94  | 2263  | Dolerite           |
| 17DL07-1-62 | 3.13 | 0.020 | 5.1  | 0.30 | 6.22 | 11.70 | 1.60 | 50.2  | 15.8 | 179.1 | 58.0  | 243.6  | 44.8  | 451  | 64.6  | 9455  | 1.27 | 69  | 48  | 78  | 1108  | Dolerite           |
| 17DL07-1-63 | 2.46 | 0.000 | 19.4 | 0.04 | 1.16 | 2.67  | 0.35 | 18.9  | 7.1  | 97.5  | 37.6  | 192.5  | 41.6  | 462  | 73.7  | 9939  | 1.37 | 268 | 198 | 175 | 4586  | Dolerite           |
| 17DL07-1-64 | 1.11 | 0.023 | 3.1  | 0.08 | 1.56 | 4.60  | 0.47 | 29.5  | 11.2 | 147.3 | 54.3  | 256.6  | 52.4  | 570  | 85.3  | 10641 | 0.78 | 123 | 104 | 137 | 2413  | Granitoid(<70-75%) |
| 17DL07-1-65 | 2.91 | 0.005 | 10.9 | 0.07 | 1.25 | 3.13  | 0.34 | 18.3  | 6.3  | 83.1  | 29.7  | 137.3  | 28.0  | 305  | 46.2  | 9649  | 1.18 | 120 | 72  | 188 | 1680  | Dolerite           |
| 17DL07-1-66 | 1.99 | 0.000 | 23.1 | 0.06 | 1.71 | 3.50  | 0.28 | 19.5  | 6.3  | 80.6  | 29.2  | 139.7  | 29.3  | 323  | 50.5  | 8778  | 0.78 | 99  | 73  | 57  | 1696  | Dolerite           |
| 17DL07-1-67 | 1.53 | 0.009 | 8.1  | 0.13 | 2.46 | 5.18  | 0.81 | 24.7  | 8.1  | 97.6  | 34.9  | 159.0  | 32.0  | 339  | 51.8  | 9426  | 0.79 | 156 | 93  | 85  | 2154  | Dolerite           |
| 17DL07-1-68 | 1.91 | 0.008 | 11.7 | 0.02 | 0.86 | 1.90  | 0.23 | 11.8  | 4.2  | 53.7  | 20.2  | 100.2  | 20.3  | 223  | 34.9  | 9673  | 0.80 | 258 | 95  | 164 | 2210  | Dolerite           |
| 17DL07-1-69 | 4.48 | 0.026 | 7.9  | 0.06 | 1.75 | 4.53  | 0.22 | 28.5  | 10.3 | 128.7 | 47.1  | 220.5  | 43.9  | 452  | 66.5  | 10546 | 2.15 | 131 | 96  | 153 | 2235  | Granitoid(<65%)    |
| 17DL07-1-70 | 1.21 | 0.009 | 14.2 | 0.24 | 4.04 | 6.64  | 1.46 | 32.1  | 10.7 | 124.3 | 43.6  | 199.4  | 41.1  | 443  | 67.7  | 9574  | 0.74 | 511 | 323 | 290 | 7499  | Dolerite           |
| 17DL07-1-71 | 1.38 | 0.000 | 7.2  | 0.02 | 0.32 | 0.80  | 0.19 | 5.5   | 2.1  | 29.8  | 12.0  | 65.9   | 15.1  | 190  | 34.1  | 10928 | 0.89 | 107 | 38  | 323 | 879   | Granitoid(<65%)    |
| 17DL07-1-72 | 1.87 | 0.000 | 17.1 | 0.01 | 0.47 | 1.14  | 0.17 | 8.9   | 3.4  | 48.2  | 19.3  | 100.2  | 23.1  | 263  | 42.4  | 10775 | 1.20 | 138 | 91  | 115 | 2120  | Granitoid(<65%)    |
| 17DL07-1-73 | 1.93 | 0.019 | 9.2  | 0.05 | 0.99 | 3.13  | 0.46 | 24.7  | 10.6 | 155.2 | 64.8  | 343.2  | 80.1  | 912  | 143.8 | 11375 | 1.31 | 122 | 70  | 154 | 1635  | Granitoid(<70-75%) |
| 17DL07-1-75 | 2.85 | 0.026 | 15.0 | 0.09 | 1.64 | 3.26  | 0.22 | 15.8  | 5.0  | 58.9  | 20.9  | 93.9   | 19.1  | 197  | 30.0  | 10309 | 1.47 | 170 | 187 | 122 | 4341  | Granitoid(<65%)    |
| 17DL07-1-76 | 1.69 | 0.027 | 19.0 | 0.06 | 1.45 | 3.03  | 0.94 | 14.9  | 5.0  | 62.4  | 24.2  | 122.8  | 27.0  | 310  | 53.5  | 8908  | 0.91 | 224 | 143 | 136 | 3330  | Dolerite           |

|               |       |       |      |      |       |       |      |      |      |       |      |       |      |     |       |       |      |     |     |     |       |                    |
|---------------|-------|-------|------|------|-------|-------|------|------|------|-------|------|-------|------|-----|-------|-------|------|-----|-----|-----|-------|--------------------|
| 17DL07-1-77   | 1.38  | 0.000 | 8.6  | 0.03 | 0.79  | 1.90  | 0.19 | 10.8 | 3.9  | 49.4  | 19.3 | 92.4  | 19.7 | 215 | 33.8  | 9599  | 0.75 | 139 | 91  | 116 | 2107  | Dolerite           |
| 17DL07-1-78   | 0.94  | 0.000 | 16.5 | 0.16 | 3.11  | 5.32  | 1.04 | 23.7 | 7.0  | 77.0  | 26.2 | 118.0 | 24.4 | 262 | 40.4  | 9099  | 0.63 | 283 | 190 | 149 | 4400  | Dolerite           |
| 17DL07-1-79   | 2.62  | 0.411 | 10.9 | 0.29 | 2.30  | 3.37  | 0.37 | 18.8 | 6.1  | 85.4  | 32.7 | 154.1 | 32.7 | 362 | 56.8  | 8636  | 1.38 | 211 | 120 | 195 | 2779  | Dolerite           |
| 17DL07-1-80   | 2.31  | 0.018 | 11.7 | 0.04 | 0.88  | 2.16  | 0.27 | 10.8 | 4.0  | 55.3  | 20.0 | 96.7  | 20.8 | 230 | 35.8  | 10197 | 1.23 | 110 | 100 | 105 | 2328  | Granitoid(<65%)    |
| 17DL07-1-81   | 1.86  | 0.007 | 4.1  | 0.07 | 1.80  | 4.38  | 0.29 | 29.2 | 10.7 | 135.7 | 49.8 | 235.0 | 47.9 | 509 | 78.4  | 10621 | 1.10 | 113 | 87  | 127 | 2020  | Granitoid(<70-75%) |
| 17DL07-1-82   | 0.76  | 0.020 | 3.0  | 0.06 | 1.11  | 2.63  | 0.21 | 16.9 | 6.4  | 83.3  | 31.0 | 147.8 | 31.5 | 346 | 51.9  | 10863 | 0.60 | 127 | 68  | 142 | 1570  | Granitoid(<65%)    |
| 17DL07-1-83   | 4.77  | 0.018 | 14.2 | 0.04 | 0.82  | 2.52  | 0.36 | 19.2 | 9.1  | 131.8 | 53.6 | 280.8 | 61.4 | 673 | 103.2 | 11310 | 2.90 | 215 | 131 | 202 | 3038  | Granitoid(<70-75%) |
| 17DL07-1-84   | 2.28  | 0.004 | 29.1 | 0.14 | 2.23  | 4.65  | 1.50 | 24.5 | 8.1  | 103.5 | 39.5 | 200.7 | 44.4 | 510 | 83.2  | 8611  | 1.01 | 298 | 211 | 165 | 4898  | Dolerite           |
| 17DL07-1-85   | 1.59  | 0.000 | 38.3 | 0.11 | 1.89  | 3.21  | 0.82 | 12.6 | 3.4  | 40.5  | 13.3 | 61.0  | 12.6 | 140 | 21.8  | 9446  | 0.86 | 401 | 253 | 188 | 5876  | Dolerite           |
| 17DL07-1-86   | 1.20  | 0.000 | 17.4 | 0.15 | 3.73  | 7.89  | 1.99 | 41.9 | 13.1 | 160.8 | 57.0 | 261.2 | 53.9 | 574 | 86.9  | 9786  | 0.85 | 261 | 176 | 121 | 4078  | Dolerite           |
| 17DL07-1-87   | 2.46  | 0.000 | 20.7 | 0.06 | 0.98  | 2.11  | 0.39 | 13.9 | 5.5  | 75.6  | 29.0 | 146.6 | 31.8 | 359 | 57.5  | 10090 | 1.22 | 154 | 112 | 95  | 2603  | Dolerite           |
| 17DL07-1-88   | 1.39  | 0.190 | 17.7 | 0.86 | 12.76 | 15.35 | 2.15 | 55.4 | 14.9 | 158.0 | 48.8 | 196.5 | 35.5 | 337 | 46.8  | 8888  | 0.67 | 347 | 168 | 100 | 3905  | Dolerite           |
| 17DL07-1-89   | 2.13  | 0.021 | 17.9 | 0.15 | 2.68  | 7.10  | 1.34 | 40.9 | 15.1 | 188.0 | 71.6 | 339.7 | 71.3 | 771 | 117.5 | 9977  | 1.07 | 280 | 252 | 196 | 5839  | Dolerite           |
| 17DL07-1-90   | 2.08  | 0.000 | 22.9 | 0.04 | 0.72  | 1.92  | 0.21 | 11.5 | 3.9  | 52.1  | 19.1 | 95.5  | 19.6 | 216 | 33.1  | 10575 | 1.25 | 264 | 165 | 173 | 3824  | Granitoid(<65%)    |
| 17DL07-1-91   | 2.12  | 0.016 | 27.0 | 0.09 | 1.40  | 2.40  | 1.14 | 15.0 | 6.0  | 84.0  | 35.6 | 195.4 | 46.8 | 567 | 100.8 | 7418  | 0.71 | 336 | 238 | 181 | 5526  | basalt             |
| 17DL07-1-92   | 2.35  | 0.013 | 10.5 | 0.05 | 1.30  | 3.39  | 0.31 | 21.8 | 9.0  | 120.8 | 46.7 | 231.8 | 50.1 | 559 | 87.5  | 10695 | 1.52 | 135 | 89  | 182 | 2060  | Granitoid(<70-75%) |
| 17DL07-1-93   | 2.42  | 0.175 | 25.0 | 0.17 | 3.40  | 6.12  | 1.75 | 32.9 | 11.3 | 149.7 | 56.6 | 271.9 | 58.3 | 650 | 103.2 | 8586  | 0.93 | 196 | 149 | 109 | 3461  | Dolerite           |
| 17DL07-1-94   | 2.56  | 0.023 | 5.2  | 0.04 | 0.85  | 2.11  | 0.26 | 14.2 | 5.1  | 68.2  | 25.9 | 122.7 | 25.3 | 269 | 39.9  | 9960  | 1.21 | 86  | 77  | 84  | 1793  | Dolerite           |
| 17DL07-1-95   | 3.72  | 0.000 | 0.1  | 0.00 | 0.04  | 0.03  | 0.06 | 0.4  | 0.4  | 10.8  | 6.7  | 60.6  | 21.8 | 372 | 79.9  | 14611 | 5.92 | 32  | 1   | 171 | 15    | Granitoid(<65%)    |
| 17DL07-1-96   | 1.54  | 0.016 | 7.1  | 0.04 | 0.76  | 1.83  | 0.36 | 14.5 | 5.1  | 73.6  | 27.2 | 135.5 | 28.9 | 313 | 49.0  | 9779  | 1.22 | 189 | 109 | 172 | 2532  | Dolerite           |
| 17DL07-1-97   | 1.33  | 0.032 | 27.2 | 0.12 | 2.29  | 4.31  | 0.77 | 18.1 | 5.0  | 56.0  | 18.3 | 84.6  | 17.1 | 187 | 29.1  | 9575  | 0.83 | 306 | 235 | 167 | 5450  | Dolerite           |
| 17DL07-1-98   | 1.42  | 0.009 | 8.0  | 0.09 | 1.67  | 4.07  | 0.66 | 23.1 | 8.2  | 109.6 | 40.4 | 188.9 | 38.8 | 419 | 62.1  | 9255  | 0.92 | 188 | 122 | 145 | 2827  | Dolerite           |
| 17DL07-1-99   | 1.06  | 0.006 | 15.7 | 0.09 | 1.73  | 3.22  | 0.75 | 17.2 | 5.7  | 72.3  | 26.9 | 133.0 | 29.5 | 334 | 51.6  | 9292  | 0.51 | 152 | 128 | 101 | 2981  | Dolerite           |
| 17DL07-1-100  | 2.99  | 0.009 | 13.8 | 0.10 | 1.25  | 2.37  | 0.48 | 12.8 | 4.1  | 51.6  | 18.8 | 92.6  | 20.0 | 229 | 35.7  | 9368  | 1.20 | 57  | 43  | 47  | 1002  | Dolerite           |
| 17DL09-1.1-01 | 0.77  | 0.000 | 3.0  | 0.05 | 1.06  | 3.63  | 0.28 | 28.3 | 11.4 | 155.4 | 60.7 | 298.3 | 60.2 | 631 | 104.3 | 10555 | 0.55 | 194 | 96  | 201 | 2212  | Granitoid(<70-75%) |
| 17DL09-1.1-02 | 1.44  | 0.041 | 7.8  | 0.04 | 1.44  | 4.05  | 0.46 | 22.8 | 8.5  | 108.4 | 41.3 | 195.9 | 39.2 | 406 | 69.7  | 10071 | 0.69 | 154 | 115 | 107 | 2649  | Dolerite           |
| 17DL09-1.1-03 | 1.38  | 0.011 | 4.0  | 0.05 | 1.51  | 3.84  | 0.21 | 25.7 | 8.6  | 111.6 | 40.9 | 196.0 | 37.2 | 377 | 64.9  | 10254 | 0.83 | 201 | 108 | 141 | 2499  | Granitoid(<65%)    |
| 17DL09-1.1-04 | 2.21  | 0.013 | 24.4 | 0.14 | 2.89  | 3.82  | 0.76 | 23.3 | 8.5  | 117.6 | 46.5 | 242.0 | 50.7 | 567 | 102.5 | 7856  | 1.07 | 775 | 561 | 292 | 12926 | basalt             |
| 17DL09-1.1-05 | 17.80 | 0.006 | 23.6 | 0.12 | 2.10  | 4.55  | 0.25 | 24.6 | 8.9  | 123.5 | 44.8 | 210.6 | 41.6 | 407 | 60.0  | 10678 | 7.96 | 179 | 124 | 207 | 2862  | Granitoid(<65%)    |
| 17DL09-1.1-06 | 0.76  | 0.039 | 7.2  | 0.04 | 0.76  | 1.84  | 0.69 | 9.4  | 3.2  | 43.6  | 16.4 | 88.1  | 20.4 | 246 | 47.7  | 9649  | 0.41 | 65  | 32  | 82  | 746   | Dolerite           |
| 17DL09-1.1-07 | 3.25  | 0.028 | 37.6 | 0.03 | 1.18  | 3.06  | 0.60 | 18.8 | 6.5  | 86.6  | 31.5 | 152.6 | 30.9 | 324 | 55.9  | 10749 | 1.60 | 162 | 156 | 162 | 3584  | Granitoid(<65%)    |
| 17DL09-1.1-08 | 1.88  | 0.000 | 11.4 | 0.02 | 0.53  | 1.38  | 0.18 | 10.3 | 3.9  | 54.3  | 20.7 | 105.2 | 21.9 | 231 | 41.6  | 11507 | 1.08 | 278 | 155 | 249 | 3571  | Granitoid(<65%)    |
| 17DL09-1.1-09 | 4.07  | 0.101 | 63.0 | 0.13 | 2.23  | 4.23  | 1.27 | 26.2 | 9.6  | 126.7 | 48.2 | 242.5 | 50.4 | 536 | 93.8  | 9917  | 1.78 | 351 | 275 | 292 | 6336  | Dolerite           |
| 17DL09-1.1-10 | 0.92  | 0.030 | 23.2 | 0.15 | 3.08  | 5.49  | 2.00 | 22.1 | 6.5  | 74.8  | 26.5 | 129.0 | 26.7 | 296 | 58.1  | 8952  | 0.35 | 179 | 141 | 70  | 3252  | Dolerite           |
| 17DL09-1.1-11 | 2.36  | 0.000 | 24.1 | 0.05 | 1.37  | 2.45  | 0.54 | 17.5 | 6.0  | 75.4  | 27.2 | 136.2 | 28.5 | 300 | 53.1  | 10919 | 0.81 | 142 | 130 | 101 | 2985  | Granitoid(<65%)    |
| 17DL09-1.1-12 | 1.66  | 0.032 | 20.0 | 0.06 | 0.76  | 2.37  | 0.49 | 13.2 | 4.5  | 56.7  | 22.4 | 112.1 | 25.7 | 283 | 53.3  | 10379 | 1.21 | 249 | 196 | 125 | 4508  | Granitoid(<65%)    |
| 17DL09-1.1-14 | 3.49  | 0.030 | 18.8 | 0.06 | 1.37  | 3.23  | 0.32 | 16.4 | 6.8  | 90.9  | 34.5 | 170.7 | 35.4 | 377 | 62.9  | 11131 | 1.50 | 153 | 169 | 135 | 3889  | Granitoid(<65%)    |
| 17DL09-1.1-15 | 1.33  | 0.010 | 7.6  | 0.23 | 3.73  | 7.68  | 0.90 | 35.9 | 10.9 | 133.3 | 48.1 | 220.4 | 43.2 | 430 | 73.5  | 9196  | 0.79 | 98  | 80  | 72  | 1836  | Dolerite           |
| 17DL09-1.1-16 | 1.78  | 0.016 | 11.2 | 0.08 | 1.65  | 2.87  | 0.26 | 15.9 | 4.8  | 62.6  | 22.1 | 100.1 | 19.7 | 192 | 33.6  | 10097 | 0.80 | 193 | 125 | 146 | 2877  | Dolerite           |
| 17DL09-1.1-17 | 4.32  | 0.000 | 74.6 | 0.21 | 3.99  | 8.03  | 2.66 | 42.7 | 13.5 | 178.4 | 66.9 | 330.0 | 67.4 | 703 | 124.5 | 9405  | 1.31 | 405 | 360 | 186 | 8293  | Dolerite           |
| 17DL09-1.1-18 | 2.49  | 0.013 | 61.4 | 0.27 | 3.62  | 6.35  | 1.47 | 26.9 | 9.4  | 110.2 | 38.2 | 170.9 | 32.7 | 334 | 57.2  | 9952  | 1.35 | 312 | 229 | 172 | 5277  | Dolerite           |
| 17DL09-1.1-19 | 0.73  | 0.000 | 11.3 | 0.03 | 1.18  | 2.65  | 0.45 | 13.2 | 4.4  | 56.0  | 20.3 | 98.1  | 21.2 | 220 | 38.4  | 10824 | 0.77 | 183 | 117 | 142 | 2697  | Granitoid(<65%)    |

|               |       |       |      |      |       |       |      |      |      |       |      |       |      |     |       |       |      |     |     |     |      |                    |
|---------------|-------|-------|------|------|-------|-------|------|------|------|-------|------|-------|------|-----|-------|-------|------|-----|-----|-----|------|--------------------|
| 17DL09-1.-20  | 1.38  | 0.008 | 17.9 | 0.09 | 0.93  | 3.13  | 0.55 | 15.7 | 5.2  | 66.0  | 25.2 | 124.4 | 25.2 | 259 | 46.4  | 10817 | 0.67 | 213 | 185 | 145 | 4271 | Granitoid(<65%)    |
| 17DL09-1.1-21 | 1.73  | 0.000 | 9.6  | 0.07 | 1.00  | 2.24  | 0.36 | 16.3 | 6.0  | 79.7  | 31.9 | 153.1 | 31.9 | 330 | 56.6  | 10668 | 1.17 | 112 | 87  | 116 | 2016 | Granitoid(<65%)    |
| 17DL09-1.1-22 | 1.51  | 0.015 | 17.5 | 0.12 | 2.40  | 5.44  | 0.76 | 27.5 | 9.2  | 110.4 | 40.3 | 189.6 | 37.8 | 383 | 64.5  | 10409 | 0.99 | 246 | 178 | 160 | 4112 | Granitoid(<65%)    |
| 17DL09-1.1-23 | 0.58  | 0.000 | 8.7  | 0.04 | 1.48  | 3.31  | 0.50 | 18.1 | 5.9  | 70.5  | 24.8 | 114.4 | 23.0 | 234 | 40.2  | 10644 | 0.64 | 83  | 60  | 47  | 1376 | Granitoid(<65%)    |
| 17DL09-1.1-24 | 0.93  | 0.062 | 15.3 | 0.25 | 4.59  | 8.32  | 1.82 | 52.0 | 17.4 | 217.9 | 85.6 | 414.2 | 84.1 | 852 | 144.7 | 10204 | 0.45 | 339 | 281 | 171 | 6464 | Granitoid(<70-75%) |
| 17DL09-1.1-25 | 1.29  | 0.032 | 12.9 | 0.02 | 0.40  | 1.47  | 0.24 | 9.0  | 2.8  | 33.0  | 12.1 | 56.6  | 12.0 | 119 | 20.0  | 12451 | 0.63 | 108 | 81  | 63  | 1857 | carbonate          |
| 17DL09-1.1-27 | 2.03  | 0.251 | 22.0 | 0.31 | 2.62  | 3.58  | 0.89 | 20.3 | 7.9  | 108.0 | 41.5 | 209.2 | 44.5 | 475 | 84.4  | 10808 | 0.82 | 124 | 105 | 89  | 2408 | Granitoid(<65%)    |
| 17DL09-1.1-28 | 1.53  | 0.000 | 12.5 | 0.01 | 0.92  | 2.46  | 0.20 | 14.1 | 4.9  | 60.4  | 23.6 | 117.9 | 23.8 | 251 | 43.4  | 11622 | 1.22 | 285 | 176 | 237 | 4066 | Granitoid(<65%)    |
| 17DL09-1.1-29 | 1.51  | 0.018 | 7.7  | 0.09 | 1.72  | 3.45  | 0.63 | 26.4 | 9.7  | 116.7 | 46.0 | 226.2 | 44.7 | 465 | 78.7  | 10973 | 0.52 | 167 | 125 | 112 | 2887 | Granitoid(<65%)    |
| 17DL09-1.1-30 | 4.33  | 0.000 | 41.9 | 0.11 | 2.23  | 5.56  | 0.61 | 30.7 | 10.2 | 128.8 | 50.6 | 251.8 | 52.4 | 544 | 92.1  | 11527 | 2.15 | 486 | 399 | 231 | 9195 | Granitoid(<70-75%) |
| 17DL09-1.1-31 | 1.99  | 0.012 | 10.7 | 0.05 | 1.07  | 2.29  | 0.26 | 14.3 | 5.5  | 73.5  | 29.5 | 146.1 | 31.4 | 347 | 59.5  | 12032 | 1.15 | 145 | 110 | 151 | 2524 | Granitoid(<65%)    |
| 17DL09-1.1-32 | 2.08  | 0.000 | 21.8 | 0.07 | 0.84  | 1.96  | 0.56 | 17.5 | 6.3  | 90.6  | 35.3 | 178.5 | 38.5 | 417 | 73.0  | 11702 | 1.40 | 202 | 160 | 149 | 3696 | Granitoid(<65%)    |
| 17DL09-1.1-33 | 2.48  | 0.030 | 17.2 | 0.11 | 2.47  | 4.47  | 0.10 | 23.5 | 7.2  | 91.7  | 34.3 | 158.0 | 32.4 | 345 | 61.0  | 8624  | 1.13 | 395 | 152 | 256 | 3491 | Dolerite           |
| 17DL09-1.1-34 | 1.21  | 0.000 | 5.0  | 0.04 | 0.99  | 3.61  | 0.17 | 24.5 | 9.3  | 127.3 | 46.9 | 218.9 | 41.9 | 406 | 62.6  | 13255 | 0.76 | 178 | 84  | 232 | 1926 | Granitoid(<65%)    |
| 17DL09-1.1-35 | 2.54  | 0.026 | 20.3 | 0.03 | 1.05  | 2.13  | 0.34 | 16.1 | 5.8  | 80.4  | 31.9 | 159.9 | 34.2 | 362 | 64.9  | 11375 | 1.19 | 179 | 138 | 128 | 3170 | Granitoid(<65%)    |
| 17DL09-1.1-36 | 2.27  | 0.031 | 13.8 | 0.05 | 1.13  | 2.14  | 0.29 | 15.8 | 5.9  | 72.3  | 26.7 | 122.5 | 25.4 | 259 | 43.1  | 12220 | 2.34 | 424 | 395 | 630 | 9108 | Granitoid(<65%)    |
| 17DL09-1.1-37 | 0.77  | 0.011 | 18.3 | 0.05 | 1.02  | 1.67  | 0.35 | 6.8  | 2.1  | 25.1  | 9.8  | 49.3  | 10.9 | 134 | 28.0  | 12620 | 0.68 | 189 | 160 | 310 | 3693 | Granitoid(<65%)    |
| 17DL09-1.1-38 | 1.28  | 0.032 | 16.9 | 0.09 | 1.37  | 2.49  | 0.56 | 12.8 | 4.4  | 51.2  | 18.6 | 83.0  | 16.6 | 175 | 30.1  | 10333 | 0.92 | 207 | 102 | 72  | 2355 | Granitoid(<65%)    |
| 17DL09-1.1-39 | 5.28  | 0.072 | 39.0 | 0.12 | 1.49  | 3.02  | 0.40 | 17.1 | 6.4  | 95.5  | 35.0 | 184.1 | 38.3 | 419 | 77.8  | 10778 | 2.42 | 208 | 158 | 123 | 3636 | Granitoid(<65%)    |
| 17DL09-1.1-40 | 0.57  | 0.113 | 16.8 | 0.19 | 2.39  | 3.87  | 0.69 | 20.5 | 6.5  | 84.7  | 30.8 | 144.1 | 29.0 | 294 | 51.3  | 10813 | 0.88 | 312 | 211 | 194 | 4864 | Granitoid(<65%)    |
| 17DL09-1.1-41 | 4.78  | 0.000 | 13.4 | 0.04 | 1.28  | 3.10  | 0.13 | 22.0 | 7.5  | 100.2 | 37.8 | 180.9 | 36.7 | 377 | 64.1  | 10488 | 1.88 | 190 | 129 | 159 | 2983 | Granitoid(<65%)    |
| 17DL09-1.1-42 | 2.29  | 0.162 | 13.9 | 0.12 | 1.58  | 2.71  | 0.36 | 15.9 | 6.1  | 77.7  | 28.5 | 142.8 | 30.1 | 312 | 54.5  | 11311 | 1.13 | 157 | 155 | 150 | 3565 | Granitoid(<65%)    |
| 17DL09-1.1-43 | 0.77  | 0.024 | 8.8  | 0.00 | 0.63  | 0.97  | 0.06 | 9.5  | 2.8  | 34.0  | 13.3 | 66.5  | 14.0 | 144 | 25.2  | 12429 | 0.65 | 251 | 155 | 211 | 3579 | Granitoid(<65%)    |
| 17DL09-1.1-44 | 2.34  | 0.014 | 81.7 | 0.77 | 12.14 | 16.34 | 3.45 | 64.1 | 19.3 | 203.2 | 68.5 | 304.7 | 57.8 | 561 | 96.1  | 9793  | 0.90 | 257 | 323 | 104 | 7442 | Dolerite           |
| 17DL09-1.1-45 | 2.09  | 0.054 | 13.8 | 0.00 | 0.27  | 0.43  | 0.16 | 2.9  | 0.9  | 13.5  | 6.3  | 36.4  | 9.3  | 110 | 23.0  | 15765 | 1.41 | 366 | 129 | 238 | 2974 | Granitoid(<65%)    |
| 17DL09-1.1-46 | 2.17  | 0.000 | 29.1 | 0.09 | 1.79  | 3.63  | 1.32 | 19.6 | 6.1  | 72.9  | 26.4 | 135.1 | 28.2 | 319 | 57.3  | 10842 | 0.87 | 319 | 258 | 239 | 5953 | Granitoid(<65%)    |
| 17DL09-1.1-47 | 2.13  | 0.011 | 24.5 | 0.09 | 1.23  | 2.50  | 0.32 | 16.5 | 6.6  | 89.8  | 35.4 | 176.9 | 38.5 | 410 | 72.8  | 11894 | 1.50 | 249 | 190 | 182 | 4384 | Granitoid(<65%)    |
| 17DL09-1.1-49 | 14.76 | 0.033 | 15.9 | 0.06 | 0.79  | 2.29  | 0.09 | 18.8 | 8.3  | 118.4 | 49.1 | 248.2 | 52.6 | 544 | 90.8  | 15121 | 4.82 | 157 | 107 | 194 | 2462 | Granitoid(<70-75%) |
| 17DL09-1.1-50 | 0.75  | 0.000 | 11.7 | 0.05 | 0.81  | 2.48  | 0.28 | 13.6 | 4.0  | 46.0  | 17.3 | 79.3  | 15.7 | 159 | 28.9  | 11513 | 0.55 | 101 | 62  | 86  | 1431 | Granitoid(<65%)    |
| 17DL09-1.1-51 | 2.94  | 0.000 | 26.3 | 0.08 | 0.70  | 2.42  | 0.36 | 19.2 | 7.6  | 97.4  | 40.1 | 203.5 | 43.5 | 472 | 83.9  | 11868 | 1.48 | 248 | 185 | 161 | 4258 | Granitoid(<65%)    |
| 17DL09-1.1-52 | 0.83  | 0.032 | 0.1  | 0.00 | 0.08  | 0.07  | 0.01 | 0.0  | 0.3  | 10.2  | 7.8  | 73.6  | 25.5 | 377 | 91.2  | 14763 | 1.80 | 45  | 1   | 234 | 12   | Granitoid(<65%)    |
| 17DL09-1.1-53 | 0.96  | 0.000 | 14.2 | 0.06 | 1.27  | 3.93  | 0.84 | 24.4 | 9.0  | 119.8 | 43.5 | 218.1 | 43.2 | 460 | 78.3  | 11112 | 0.33 | 88  | 69  | 66  | 1590 | Granitoid(<65%)    |
| 17DL09-1.1-55 | 1.28  | 0.000 | 26.0 | 0.08 | 1.72  | 2.69  | 0.61 | 13.8 | 4.3  | 50.2  | 17.4 | 82.9  | 17.3 | 188 | 32.5  | 9848  | 1.06 | 229 | 172 | 135 | 3966 | Dolerite           |
| 17DL09-1.1-56 | 2.41  | 0.004 | 7.1  | 0.09 | 1.73  | 3.78  | 0.28 | 23.5 | 8.2  | 102.8 | 38.3 | 177.9 | 35.8 | 358 | 59.8  | 11688 | 1.05 | 197 | 137 | 98  | 3151 | Granitoid(<65%)    |
| 17DL09-1.1-57 | 3.21  | 0.032 | 60.4 | 0.09 | 1.23  | 3.17  | 0.50 | 19.3 | 6.3  | 83.2  | 31.7 | 152.1 | 32.5 | 354 | 58.6  | 10986 | 1.80 | 247 | 270 | 175 | 6225 | Granitoid(<65%)    |
| 17DL09-1.1-58 | 1.55  | 0.000 | 18.3 | 0.06 | 0.74  | 2.16  | 0.41 | 13.9 | 4.9  | 65.9  | 25.2 | 123.9 | 25.1 | 271 | 46.6  | 10723 | 1.22 | 292 | 199 | 222 | 4583 | Granitoid(<65%)    |
| 17DL09-1.1-59 | 3.01  | 0.057 | 20.2 | 0.07 | 2.15  | 4.01  | 0.46 | 25.8 | 8.5  | 104.0 | 38.2 | 183.4 | 38.1 | 411 | 68.6  | 10724 | 1.73 | 283 | 284 | 244 | 6540 | Granitoid(<65%)    |
| 17DL09-1.1-60 | 3.54  | 0.000 | 21.9 | 0.10 | 0.64  | 2.49  | 0.13 | 11.7 | 4.8  | 61.2  | 24.2 | 119.6 | 27.3 | 297 | 51.5  | 11277 | 1.89 | 219 | 220 | 210 | 5066 | Granitoid(<65%)    |
| 17DL09-1.1-61 | 2.08  | 0.011 | 7.5  | 0.06 | 1.24  | 2.35  | 0.26 | 15.5 | 5.1  | 69.0  | 25.0 | 117.5 | 22.6 | 235 | 38.6  | 10201 | 0.95 | 140 | 80  | 107 | 1842 | Granitoid(<65%)    |
| 17DL09-1.1-62 | 2.72  | 0.013 | 15.3 | 0.04 | 0.52  | 2.05  | 0.08 | 14.7 | 4.7  | 67.7  | 24.8 | 121.4 | 25.1 | 262 | 44.8  | 11670 | 1.57 | 276 | 182 | 235 | 4192 | Granitoid(<65%)    |
| 17DL09-1.1-63 | 2.37  | 1.167 | 27.4 | 0.47 | 2.73  | 2.58  | 0.37 | 13.9 | 5.7  | 69.7  | 28.5 | 146.1 | 31.5 | 350 | 62.5  | 10940 | 0.82 | 178 | 126 | 148 | 2899 | Granitoid(<65%)    |
| 17DL09-1.1-64 | 3.12  | 0.086 | 27.0 | 0.15 | 1.66  | 3.92  | 0.20 | 25.6 | 9.4  | 121.6 | 48.8 | 236.1 | 49.7 | 515 | 92.1  | 10918 | 1.89 | 290 | 212 | 241 | 4879 | Granitoid(<70-75%) |

|                |      |       |      |      |       |       |      |      |      |       |      |       |      |     |       |       |      |     |     |     |       |                    |
|----------------|------|-------|------|------|-------|-------|------|------|------|-------|------|-------|------|-----|-------|-------|------|-----|-----|-----|-------|--------------------|
| 17DL09-1.1-65  | 0.77 | 0.000 | 10.5 | 0.08 | 0.93  | 2.77  | 0.17 | 13.9 | 4.1  | 56.8  | 21.1 | 99.2  | 21.1 | 218 | 35.7  | 12553 | 0.90 | 213 | 146 | 134 | 3363  | Granitoid(<65%)    |
| 17DL09-1.1-66  | 1.61 | 0.043 | 44.4 | 0.11 | 2.82  | 5.79  | 1.85 | 32.9 | 11.2 | 138.9 | 52.3 | 257.5 | 51.8 | 568 | 98.2  | 9647  | 1.16 | 370 | 302 | 185 | 6957  | Dolerite           |
| 17DL09-1.1-67  | 2.21 | 0.000 | 19.2 | 0.06 | 1.46  | 2.84  | 0.45 | 18.0 | 6.4  | 85.6  | 31.8 | 154.3 | 32.7 | 347 | 56.4  | 10758 | 1.47 | 180 | 189 | 157 | 4346  | Granitoid(<65%)    |
| 17DL09-1.1-68  | 2.28 | 0.128 | 28.7 | 0.18 | 2.86  | 6.96  | 1.54 | 37.2 | 13.6 | 180.7 | 68.6 | 339.3 | 70.1 | 757 | 126.3 | 9501  | 1.07 | 259 | 206 | 179 | 4740  | Dolerite           |
| 17DL09-1.1-69  | 4.45 | 0.234 | 29.1 | 0.95 | 11.63 | 14.59 | 8.93 | 54.0 | 14.7 | 151.5 | 45.1 | 198.0 | 41.3 | 413 | 56.5  | 7467  | 0.55 | 628 | 749 | 256 | 17264 | basalt             |
| 17DL09-1.1-70  | 2.95 | 0.023 | 17.7 | 0.07 | 1.28  | 3.03  | 0.28 | 17.3 | 5.6  | 76.9  | 28.8 | 136.4 | 28.1 | 297 | 49.7  | 10479 | 1.71 | 195 | 204 | 192 | 4694  | Granitoid(<65%)    |
| 17DL09-1.1-71  | 3.99 | 0.106 | 29.3 | 0.15 | 1.69  | 3.30  | 0.44 | 19.1 | 7.8  | 101.8 | 41.3 | 211.0 | 44.7 | 473 | 83.6  | 10909 | 1.77 | 472 | 350 | 305 | 8061  | Granitoid(<65%)    |
| 17DL09-1.1-73  | 1.74 | 0.053 | 14.6 | 0.03 | 0.79  | 2.13  | 0.26 | 12.6 | 4.3  | 55.7  | 22.6 | 112.3 | 24.2 | 257 | 43.5  | 11468 | 1.37 | 157 | 159 | 172 | 3662  | Granitoid(<65%)    |
| 17DL09-1.1-74  | 0.96 | 0.067 | 18.7 | 0.05 | 1.56  | 2.92  | 0.40 | 15.9 | 5.4  | 70.9  | 28.0 | 143.7 | 30.6 | 336 | 58.7  | 11081 | 0.88 | 326 | 215 | 173 | 4948  | Granitoid(<65%)    |
| 17DL09-1.1-76  | 1.13 | 0.000 | 8.5  | 0.02 | 0.69  | 1.64  | 0.30 | 10.8 | 3.2  | 40.2  | 15.8 | 78.3  | 16.5 | 185 | 31.2  | 9001  | 0.46 | 83  | 58  | 56  | 1342  | Dolerite           |
| 17DL09-1.1-77  | 3.28 | 0.016 | 22.0 | 0.04 | 1.46  | 2.58  | 0.13 | 15.0 | 4.3  | 51.0  | 18.2 | 85.3  | 16.9 | 177 | 29.5  | 10381 | 1.07 | 177 | 126 | 82  | 2894  | Granitoid(<65%)    |
| 17DL09-1.1-78  | 1.11 | 0.040 | 3.9  | 0.11 | 2.29  | 6.17  | 0.54 | 40.5 | 13.8 | 175.7 | 65.1 | 306.0 | 60.3 | 623 | 105.2 | 10855 | 0.67 | 107 | 72  | 111 | 1660  | Granitoid(<70-75%) |
| 17DL09-1.1-79  | 1.56 | 0.222 | 27.4 | 0.13 | 1.93  | 3.68  | 0.95 | 18.7 | 6.9  | 98.5  | 37.2 | 187.4 | 40.5 | 443 | 75.5  | 9321  | 0.98 | 130 | 99  | 99  | 2286  | Dolerite           |
| 17DL09-1.1-81  | 0.52 | 0.034 | 8.6  | 0.05 | 0.53  | 1.01  | 0.30 | 5.8  | 1.6  | 23.2  | 8.4  | 42.9  | 9.2  | 105 | 18.9  | 9176  | 0.15 | 331 | 143 | 139 | 3292  | carbonate          |
| 17DL09-1.1-82  | 2.08 | 0.015 | 29.0 | 0.06 | 1.23  | 3.40  | 0.67 | 21.3 | 7.6  | 96.9  | 37.8 | 183.6 | 37.6 | 405 | 68.4  | 9912  | 0.91 | 174 | 134 | 109 | 3095  | Dolerite           |
| 17DL09-1.1-83  | 1.76 | 0.000 | 16.0 | 0.03 | 0.56  | 1.42  | 0.31 | 9.3  | 3.9  | 52.7  | 21.1 | 110.1 | 23.2 | 261 | 45.6  | 10051 | 1.00 | 132 | 92  | 97  | 2114  | Dolerite           |
| 17DL09-1.1-84  | 2.36 | 0.083 | 30.5 | 0.27 | 4.94  | 7.79  | 1.87 | 41.2 | 13.2 | 165.5 | 59.6 | 284.1 | 57.1 | 595 | 101.0 | 8850  | 0.88 | 290 | 231 | 132 | 5315  | Dolerite           |
| 17DL09-1.1-85  | 1.68 | 0.401 | 10.9 | 0.15 | 1.87  | 3.64  | 0.51 | 20.7 | 7.6  | 98.3  | 37.0 | 175.9 | 34.3 | 345 | 56.6  | 9885  | 1.04 | 337 | 205 | 220 | 4722  | Dolerite           |
| 17DL09-1.1-86  | 2.04 | 0.000 | 12.0 | 0.04 | 0.91  | 2.25  | 0.22 | 12.6 | 4.4  | 54.6  | 20.5 | 102.5 | 21.3 | 231 | 38.4  | 10103 | 1.08 | 102 | 97  | 102 | 2228  | Dolerite           |
| 17DL09-1.1-88  | 3.07 | 0.006 | 19.5 | 0.07 | 0.79  | 2.51  | 0.17 | 13.5 | 4.8  | 64.5  | 25.0 | 125.6 | 26.7 | 282 | 48.0  | 10442 | 1.52 | 202 | 201 | 191 | 4631  | Granitoid(<65%)    |
| 17DL09-1.1-89  | 3.69 | 0.044 | 33.4 | 0.12 | 2.02  | 3.88  | 0.70 | 22.0 | 7.6  | 99.8  | 37.7 | 187.8 | 39.8 | 434 | 74.6  | 10487 | 1.59 | 170 | 136 | 90  | 3142  | Granitoid(<65%)    |
| 17DL09-1.1-90  | 2.60 | 0.032 | 33.9 | 0.16 | 2.72  | 5.68  | 1.24 | 29.1 | 9.3  | 118.6 | 45.1 | 219.8 | 45.9 | 510 | 92.6  | 9217  | 1.30 | 300 | 221 | 178 | 5082  | Dolerite           |
| 17DL09-1.1-91  | 2.07 | 0.000 | 27.0 | 0.05 | 0.87  | 2.32  | 0.43 | 14.2 | 5.4  | 71.0  | 27.7 | 135.9 | 29.3 | 313 | 56.3  | 10301 | 1.04 | 151 | 111 | 100 | 2557  | Granitoid(<65%)    |
| 17DL09-1.1-92  | 2.93 | 0.008 | 56.5 | 0.09 | 1.95  | 4.14  | 1.15 | 21.2 | 7.5  | 101.5 | 39.8 | 207.7 | 45.7 | 504 | 93.9  | 9624  | 1.41 | 293 | 215 | 146 | 4965  | Dolerite           |
| 17DL09-1.1-93  | 0.64 | 0.003 | 7.3  | 0.07 | 0.94  | 2.20  | 0.09 | 12.8 | 4.5  | 62.4  | 24.2 | 114.8 | 23.4 | 235 | 38.2  | 11864 | 0.55 | 226 | 154 | 148 | 3549  | Granitoid(<65%)    |
| 17DL09-1.1-94  | 3.94 | 0.016 | 6.3  | 0.04 | 1.19  | 3.63  | 0.14 | 19.4 | 6.6  | 82.5  | 29.4 | 135.4 | 26.7 | 271 | 44.5  | 10774 | 2.35 | 224 | 191 | 340 | 4402  | Granitoid(<65%)    |
| 17DL09-1.1-95  | 2.04 | 0.003 | 9.7  | 0.05 | 1.35  | 3.77  | 0.32 | 26.5 | 9.2  | 129.2 | 49.9 | 252.2 | 52.1 | 569 | 96.1  | 10630 | 1.12 | 153 | 101 | 141 | 2325  | Granitoid(<70-75%) |
| 17DL09-1.1-96  | 0.87 | 0.000 | 12.9 | 0.08 | 1.28  | 2.80  | 0.34 | 15.4 | 5.1  | 63.0  | 22.2 | 98.0  | 18.3 | 181 | 28.8  | 9281  | 0.47 | 207 | 140 | 112 | 3231  | Dolerite           |
| 17DL09-1.1-97  | 2.46 | 0.000 | 10.0 | 0.06 | 0.87  | 2.42  | 0.09 | 14.7 | 5.4  | 69.6  | 26.5 | 129.4 | 26.4 | 274 | 45.4  | 10364 | 1.62 | 256 | 138 | 224 | 3176  | Granitoid(<65%)    |
| 17DL09-1.1-98  | 1.05 | 0.029 | 9.0  | 0.15 | 3.14  | 6.35  | 1.23 | 32.6 | 9.9  | 119.8 | 42.9 | 196.6 | 39.3 | 405 | 66.3  | 9892  | 0.67 | 135 | 90  | 84  | 2064  | Dolerite           |
| 17DL09-1.1-99  | 4.88 | 0.024 | 39.1 | 0.09 | 1.46  | 3.48  | 0.51 | 18.1 | 6.3  | 83.1  | 30.7 | 152.7 | 32.3 | 352 | 60.2  | 10329 | 1.92 | 147 | 158 | 117 | 3636  | Granitoid(<65%)    |
| 17DL09-1.1-100 | 0.75 | 0.000 | 6.7  | 0.04 | 0.62  | 1.20  | 0.08 | 7.0  | 2.4  | 33.9  | 11.8 | 57.6  | 11.9 | 120 | 19.7  | 11325 | 0.33 | 131 | 83  | 96  | 1903  | carbonate          |
| 17DC01-1-01    | 3.30 | 0.056 | 19.8 | 0.06 | 0.98  | 3.38  | 0.35 | 20.2 | 7.7  | 101.7 | 39.6 | 195.3 | 40.7 | 433 | 73.4  | 11026 | 1.38 | 185 | 129 | 159 | 3008  | Granitoid(<65%)    |
| 17DC01-1-02    | 8.17 | 0.108 | 15.7 | 0.03 | 1.05  | 2.45  | 0.11 | 15.5 | 6.3  | 88.4  | 35.0 | 163.8 | 33.2 | 353 | 55.8  | 12289 | 3.10 | 128 | 77  | 160 | 1804  | Granitoid(<65%)    |
| 17DC01-1-03    | 2.71 | 0.013 | 23.8 | 0.04 | 0.85  | 1.73  | 0.27 | 14.1 | 4.5  | 65.4  | 26.5 | 132.1 | 29.3 | 334 | 56.2  | 11778 | 1.60 | 233 | 156 | 182 | 3626  | Granitoid(<65%)    |
| 17DC01-1-04    | 1.76 | 0.000 | 16.9 | 0.07 | 2.29  | 4.53  | 0.43 | 29.4 | 9.2  | 117.2 | 41.7 | 197.9 | 39.9 | 419 | 67.8  | 11074 | 1.33 | 279 | 270 | 243 | 6302  | Granitoid(<65%)    |
| 17DC01-1-06    | 2.73 | 0.036 | 13.9 | 0.04 | 0.82  | 1.79  | 0.13 | 10.1 | 3.9  | 48.6  | 19.1 | 91.9  | 18.5 | 204 | 33.8  | 11835 | 1.31 | 371 | 221 | 275 | 5155  | Granitoid(<65%)    |
| 17DC01-1-07    | 0.54 | 0.073 | 2.4  | 0.04 | 0.94  | 2.60  | 0.22 | 21.5 | 8.8  | 127.0 | 51.2 | 257.5 | 53.2 | 567 | 93.7  | 12298 | 0.51 | 159 | 72  | 192 | 1681  | Granitoid(<70-75%) |
| 17DC01-1-08    | 0.27 | 0.028 | 8.2  | 0.03 | 0.98  | 1.53  | 0.36 | 6.7  | 2.6  | 29.2  | 11.2 | 55.5  | 11.9 | 135 | 23.3  | 9872  | 0.38 | 122 | 47  | 65  | 1096  | Dolerite           |
| 17DC01-1-09    | 1.44 | 0.033 | 14.6 | 0.05 | 0.91  | 1.30  | 0.04 | 10.5 | 3.8  | 47.5  | 19.4 | 100.8 | 21.1 | 228 | 39.8  | 12185 | 1.43 | 253 | 163 | 232 | 3796  | Granitoid(<65%)    |
| 17DC01-1-10    | 2.93 | 0.000 | 34.3 | 0.10 | 1.68  | 2.86  | 0.68 | 11.1 | 3.7  | 47.3  | 17.4 | 86.4  | 17.8 | 199 | 35.5  | 12145 | 1.31 | 322 | 307 | 233 | 7168  | Granitoid(<65%)    |
| 17DC01-1-11    | 0.81 | 2.720 | 23.7 | 0.84 | 5.32  | 3.82  | 0.36 | 22.6 | 7.9  | 91.6  | 35.0 | 171.3 | 32.8 | 353 | 59.4  | 11987 | 1.28 | 265 | 257 | 241 | 5996  | Granitoid(<65%)    |

|             |      |       |      |      |       |       |      |      |      |       |      |       |       |      |       |       |      |     |     |     |      |                    |
|-------------|------|-------|------|------|-------|-------|------|------|------|-------|------|-------|-------|------|-------|-------|------|-----|-----|-----|------|--------------------|
| 17DC01-1-12 | 0.80 | 0.034 | 17.8 | 0.04 | 0.72  | 1.75  | 0.39 | 11.2 | 3.9  | 60.2  | 23.6 | 123.3 | 25.6  | 289  | 51.1  | 11588 | 0.83 | 161 | 102 | 108 | 2367 | Granitoid(<65%)    |
| 17DC01-1-13 | 2.35 | 0.074 | 28.2 | 0.03 | 1.16  | 2.18  | 0.34 | 16.7 | 6.5  | 92.3  | 36.4 | 185.8 | 39.4  | 433  | 76.1  | 12329 | 1.65 | 292 | 204 | 209 | 4767 | Granitoid(<65%)    |
| 17DC01-1-14 | 2.70 | 0.025 | 23.0 | 0.02 | 0.97  | 2.48  | 0.23 | 12.5 | 5.4  | 69.9  | 28.1 | 143.0 | 30.8  | 343  | 60.1  | 11817 | 1.44 | 243 | 161 | 180 | 3748 | Granitoid(<65%)    |
| 17DC01-1-15 | 2.18 | 0.000 | 17.2 | 0.06 | 2.02  | 4.27  | 0.67 | 24.4 | 8.2  | 107.5 | 41.8 | 203.3 | 40.3  | 445  | 77.5  | 10663 | 1.01 | 166 | 122 | 89  | 2844 | Granitoid(<65%)    |
| 17DC01-1-16 | 1.00 | 0.053 | 14.1 | 0.00 | 0.46  | 0.69  | 0.22 | 2.8  | 0.9  | 12.7  | 5.0  | 24.3  | 5.8   | 70   | 14.8  | 10447 | 0.28 | 179 | 99  | 131 | 2304 | carbonate          |
| 17DC01-1-17 | 2.89 | 0.281 | 15.7 | 0.08 | 1.54  | 3.08  | 0.20 | 18.8 | 6.8  | 92.7  | 35.0 | 170.4 | 32.9  | 353  | 59.2  | 11470 | 1.64 | 362 | 241 | 277 | 5616 | Granitoid(<65%)    |
| 17DC01-1-18 | 0.00 | 0.000 | 2.6  | 0.25 | 4.61  | 9.99  | 0.25 | 54.8 | 17.3 | 212.3 | 72.7 | 318.6 | 58.1  | 572  | 94.0  | 11192 | 0.39 | 357 | 211 | 230 | 4910 | Granitoid(<70-75%) |
| 17DC01-1-20 | 0.62 | 0.068 | 7.1  | 0.03 | 0.86  | 1.89  | 0.82 | 8.5  | 3.1  | 37.1  | 12.6 | 62.0  | 13.3  | 147  | 27.4  | 11369 | 0.63 | 236 | 182 | 277 | 4244 | Granitoid(<65%)    |
| 17DC01-1-21 | 3.45 | 0.000 | 13.5 | 0.02 | 0.85  | 1.91  | 0.17 | 8.1  | 3.8  | 52.4  | 19.7 | 101.4 | 21.7  | 235  | 41.5  | 11670 | 1.92 | 357 | 304 | 407 | 7080 | Granitoid(<65%)    |
| 17DC01-1-22 | 1.37 | 0.000 | 25.3 | 0.05 | 1.41  | 2.87  | 1.03 | 15.5 | 5.0  | 65.6  | 26.6 | 131.8 | 27.9  | 308  | 56.7  | 9799  | 0.72 | 181 | 134 | 91  | 3125 | Dolerite           |
| 17DC01-1-23 | 6.19 | 1.805 | 68.3 | 0.99 | 7.11  | 5.97  | 1.35 | 23.8 | 7.6  | 93.4  | 34.7 | 166.7 | 34.9  | 385  | 65.6  | 10886 | 1.98 | 329 | 314 | 320 | 7314 | Granitoid(<65%)    |
| 17DC01-1-24 | 3.41 | 0.028 | 10.9 | 0.04 | 1.02  | 2.90  | 0.35 | 20.6 | 8.0  | 108.0 | 41.5 | 195.8 | 39.1  | 414  | 69.9  | 10282 | 1.35 | 157 | 107 | 118 | 2497 | Granitoid(<65%)    |
| 17DC01-1-25 | 3.81 | 0.204 | 51.6 | 0.10 | 1.65  | 4.33  | 0.87 | 27.4 | 9.1  | 114.9 | 44.8 | 229.4 | 48.8  | 556  | 96.7  | 10945 | 2.34 | 532 | 392 | 355 | 9143 | Granitoid(<70-75%) |
| 17DC01-1-26 | 3.88 | 0.529 | 26.2 | 0.29 | 2.07  | 2.19  | 0.29 | 12.8 | 5.4  | 73.7  | 28.6 | 144.3 | 31.2  | 357  | 61.9  | 11089 | 1.84 | 291 | 187 | 227 | 4357 | Granitoid(<65%)    |
| 17DC01-1-27 | 0.80 | 0.000 | 10.3 | 0.04 | 0.69  | 3.68  | 0.27 | 18.2 | 6.8  | 93.2  | 35.3 | 174.1 | 36.3  | 370  | 61.1  | 11606 | 1.04 | 348 | 189 | 300 | 4396 | Granitoid(<65%)    |
| 17DC01-1-28 | 2.37 | 0.000 | 23.0 | 0.07 | 1.02  | 3.27  | 0.19 | 15.8 | 6.1  | 84.7  | 31.6 | 161.4 | 34.3  | 375  | 62.3  | 11462 | 2.02 | 334 | 301 | 334 | 7012 | Granitoid(<65%)    |
| 17DC01-1-29 | 3.13 | 0.464 | 28.2 | 0.25 | 2.11  | 2.11  | 0.31 | 16.4 | 5.6  | 84.5  | 33.6 | 171.0 | 36.9  | 410  | 68.9  | 11173 | 1.57 | 319 | 210 | 223 | 4898 | Granitoid(<65%)    |
| 17DC01-1-30 | 2.14 | 0.017 | 11.5 | 0.03 | 0.73  | 1.29  | 0.13 | 7.6  | 2.5  | 37.7  | 14.8 | 77.0  | 17.5  | 202  | 33.9  | 12014 | 1.30 | 192 | 119 | 148 | 2771 | Granitoid(<65%)    |
| 17DC01-1-31 | 0.67 | 0.019 | 27.6 | 0.06 | 0.99  | 2.30  | 0.32 | 16.5 | 5.4  | 80.6  | 32.6 | 164.5 | 34.2  | 386  | 65.7  | 11421 | 1.59 | 287 | 190 | 198 | 4440 | Granitoid(<65%)    |
| 17DC01-1-32 | 0.64 | 0.080 | 34.7 | 0.25 | 4.79  | 8.24  | 2.19 | 40.9 | 12.4 | 150.3 | 52.7 | 236.5 | 46.8  | 490  | 80.3  | 9415  | 0.84 | 297 | 213 | 124 | 4963 | Dolerite           |
| 17DC01-1-33 | 1.15 | 0.000 | 6.9  | 0.00 | 0.45  | 1.95  | 0.49 | 12.4 | 4.6  | 65.7  | 24.7 | 121.3 | 24.1  | 254  | 44.1  | 10241 | 0.70 | 214 | 114 | 177 | 2666 | Granitoid(<65%)    |
| 17DC01-1-34 | 1.48 | 0.053 | 19.8 | 0.05 | 0.63  | 1.92  | 0.51 | 15.5 | 6.0  | 82.3  | 31.4 | 150.3 | 33.1  | 357  | 62.1  | 10631 | 1.08 | 190 | 137 | 129 | 3201 | Granitoid(<65%)    |
| 17DC01-1-36 | 8.39 | 0.022 | 15.0 | 0.09 | 1.35  | 3.88  | 0.17 | 24.3 | 7.6  | 100.1 | 37.2 | 171.0 | 34.0  | 326  | 55.4  | 10927 | 4.34 | 284 | 252 | 277 | 5872 | Granitoid(<65%)    |
| 17DC01-1-37 | 2.79 | 0.036 | 25.1 | 0.10 | 2.05  | 3.47  | 0.73 | 20.8 | 6.7  | 81.9  | 32.1 | 156.2 | 32.2  | 351  | 60.7  | 9746  | 1.03 | 490 | 346 | 212 | 8073 | Dolerite           |
| 17DC01-1-38 | 3.58 | 0.133 | 37.3 | 0.09 | 1.21  | 2.57  | 0.50 | 16.9 | 6.3  | 85.5  | 34.0 | 173.5 | 38.1  | 427  | 75.3  | 11356 | 2.52 | 264 | 209 | 170 | 4864 | Granitoid(<65%)    |
| 17DC01-1-39 | 0.89 | 0.042 | 0.8  | 0.02 | 0.93  | 3.51  | 0.08 | 28.7 | 12.1 | 163.2 | 59.8 | 275.8 | 55.2  | 553  | 93.5  | 12389 | 0.59 | 219 | 53  | 357 | 1242 | Granitoid(<70-75%) |
| 17DC01-1-40 | 1.13 | 0.000 | 7.2  | 0.04 | 0.70  | 1.90  | 0.34 | 10.9 | 3.8  | 51.6  | 18.9 | 94.2  | 19.1  | 194  | 34.3  | 9404  | 0.56 | 64  | 35  | 98  | 817  | Dolerite           |
| 17DC01-1-42 | 1.89 | 0.019 | 19.4 | 0.05 | 0.49  | 1.73  | 0.25 | 13.1 | 4.4  | 59.2  | 25.1 | 125.7 | 27.4  | 306  | 54.2  | 11045 | 1.19 | 192 | 117 | 132 | 2731 | Granitoid(<65%)    |
| 17DC01-1-43 | 0.91 | 0.092 | 3.5  | 0.00 | 0.89  | 2.51  | 0.02 | 20.0 | 8.7  | 129.1 | 51.8 | 272.8 | 56.9  | 597  | 102.0 | 12205 | 0.70 | 181 | 76  | 210 | 1760 | Granitoid(<70-75%) |
| 17DC01-1-44 | 0.31 | 0.007 | 7.6  | 0.13 | 1.83  | 2.24  | 0.90 | 10.1 | 3.5  | 44.7  | 17.0 | 92.4  | 21.0  | 258  | 51.8  | 8701  | 0.21 | 242 | 148 | 87  | 3458 | Dolerite           |
| 17DC01-1-45 | 2.36 | 0.000 | 26.5 | 0.03 | 0.77  | 1.66  | 0.24 | 9.3  | 3.3  | 52.0  | 20.9 | 113.1 | 26.0  | 289  | 53.5  | 11993 | 1.87 | 197 | 123 | 176 | 2874 | Granitoid(<65%)    |
| 17DC01-1-46 | 4.26 | 0.157 | 19.8 | 0.16 | 0.95  | 3.16  | 0.09 | 20.5 | 7.1  | 101.4 | 39.3 | 198.7 | 40.8  | 437  | 74.6  | 11972 | 2.37 | 209 | 142 | 212 | 3321 | Granitoid(<65%)    |
| 17DC01-1-47 | 4.75 | 0.333 | 42.7 | 0.12 | 0.80  | 2.23  | 0.46 | 10.3 | 4.1  | 58.7  | 23.9 | 127.9 | 29.8  | 349  | 66.8  | 11765 | 1.72 | 330 | 232 | 175 | 5408 | Granitoid(<65%)    |
| 17DC01-1-48 | 1.95 | 0.088 | 8.2  | 0.07 | 1.02  | 2.35  | 0.21 | 13.3 | 5.4  | 68.3  | 25.6 | 128.9 | 26.0  | 277  | 47.8  | 11428 | 0.98 | 241 | 127 | 196 | 2965 | Granitoid(<65%)    |
| 17DC01-1-49 | 2.35 | 0.000 | 3.7  | 0.10 | 1.22  | 3.49  | 0.35 | 21.4 | 7.1  | 101.9 | 38.7 | 186.4 | 39.0  | 405  | 71.9  | 11787 | 1.22 | 283 | 135 | 287 | 3149 | Granitoid(<65%)    |
| 17DC01-1-50 | 3.30 | 0.030 | 8.5  | 0.00 | 0.15  | 1.21  | 0.60 | 13.5 | 10.4 | 191.5 | 81.5 | 508.4 | 122.4 | 1443 | 258.3 | 14765 | 4.30 | 153 | 30  | 402 | 704  | Granitoid(<70-75%) |
| 17DC01-1-51 | 1.63 | 0.074 | 43.5 | 0.36 | 7.16  | 12.04 | 2.28 | 47.4 | 14.9 | 167.6 | 54.2 | 263.2 | 49.2  | 502  | 86.0  | 10127 | 0.81 | 369 | 397 | 157 | 9259 | Dolerite           |
| 17DC01-1-52 | 1.61 | 0.037 | 11.3 | 0.07 | 0.80  | 2.20  | 0.23 | 16.2 | 5.8  | 83.7  | 31.5 | 159.6 | 31.7  | 329  | 56.9  | 10676 | 1.15 | 155 | 109 | 152 | 2552 | Granitoid(<65%)    |
| 17DC01-1-53 | 0.40 | 1.316 | 34.3 | 0.61 | 5.72  | 8.45  | 1.29 | 36.3 | 12.0 | 139.6 | 49.5 | 234.6 | 46.9  | 480  | 83.1  | 11298 | 1.01 | 358 | 333 | 185 | 7765 | Granitoid(<65%)    |
| 17DC01-1-54 | 1.29 | 0.039 | 22.8 | 0.14 | 2.36  | 5.70  | 1.22 | 25.7 | 8.7  | 118.6 | 42.4 | 209.7 | 41.3  | 424  | 73.9  | 9528  | 0.73 | 117 | 74  | 84  | 1713 | Dolerite           |
| 17DC01-1-56 | 1.53 | 0.026 | 7.8  | 0.03 | 1.18  | 2.40  | 0.34 | 17.8 | 6.5  | 95.3  | 37.2 | 189.6 | 38.9  | 429  | 75.2  | 11589 | 0.67 | 125 | 77  | 121 | 1795 | Granitoid(<65%)    |
| 17DC01-1-57 | 1.00 | 0.039 | 21.4 | 0.59 | 11.01 | 13.35 | 1.89 | 43.0 | 10.8 | 107.0 | 32.2 | 136.1 | 23.7  | 229  | 35.9  | 9238  | 0.41 | 329 | 186 | 160 | 4332 | Dolerite           |

|              |       |       |      |      |       |       |      |      |      |       |      |       |      |     |       |       |      |     |     |     |       |                    |
|--------------|-------|-------|------|------|-------|-------|------|------|------|-------|------|-------|------|-----|-------|-------|------|-----|-----|-----|-------|--------------------|
| 17DC01-1-58  | 0.69  | 0.000 | 6.8  | 0.08 | 1.24  | 2.89  | 0.39 | 21.9 | 7.3  | 101.9 | 37.1 | 188.1 | 36.5 | 385 | 65.2  | 10744 | 0.78 | 203 | 113 | 156 | 2625  | Granitoid(<65%)    |
| 17DC01-1-59  | 2.68  | 0.140 | 45.2 | 0.79 | 12.13 | 15.30 | 4.27 | 56.1 | 14.8 | 153.8 | 48.8 | 203.6 | 36.3 | 361 | 58.5  | 8848  | 0.99 | 376 | 267 | 107 | 6213  | Dolerite           |
| 17DC01-1-61  | 1.64  | 0.611 | 29.3 | 0.30 | 3.42  | 4.29  | 0.73 | 20.9 | 4.8  | 50.2  | 16.5 | 79.4  | 16.0 | 167 | 30.5  | 8782  | 0.78 | 676 | 283 | 231 | 6592  | Dolerite           |
| 17DC01-1-63  | 0.00  | 0.142 | 26.9 | 0.53 | 8.23  | 14.60 | 6.28 | 58.2 | 15.5 | 167.7 | 55.4 | 253.1 | 48.6 | 527 | 93.1  | 7864  | 0.40 | 821 | 622 | 343 | 14490 | basalt             |
| 17DC01-1-64  | 3.11  | 0.002 | 19.1 | 0.03 | 0.84  | 2.73  | 0.17 | 18.0 | 7.3  | 99.6  | 39.8 | 200.1 | 40.3 | 449 | 76.4  | 10937 | 2.28 | 388 | 222 | 333 | 5176  | Granitoid(<65%)    |
| 17DC01-1-65  | 3.44  | 0.000 | 9.3  | 0.07 | 2.93  | 6.59  | 0.47 | 37.6 | 11.3 | 148.2 | 51.7 | 244.0 | 48.1 | 513 | 86.8  | 12743 | 1.47 | 372 | 267 | 123 | 6212  | Granitoid(<70-75%) |
| 17DC01-1-67  | 3.09  | 0.038 | 22.5 | 0.04 | 0.72  | 1.58  | 0.34 | 12.5 | 4.9  | 69.1  | 27.1 | 137.9 | 29.5 | 319 | 56.0  | 11202 | 1.60 | 222 | 149 | 160 | 3473  | Granitoid(<65%)    |
| 17DC01-1-68  | 1.27  | 0.000 | 19.8 | 0.06 | 1.57  | 3.46  | 0.63 | 21.0 | 6.6  | 81.7  | 30.1 | 153.3 | 33.1 | 363 | 65.8  | 9012  | 0.51 | 235 | 157 | 123 | 3660  | Dolerite           |
| 17DC01-1-69  | 4.44  | 0.096 | 15.4 | 0.03 | 1.29  | 2.80  | 0.28 | 17.0 | 5.8  | 79.2  | 30.2 | 140.7 | 28.6 | 313 | 50.8  | 10304 | 1.56 | 181 | 105 | 269 | 2459  | Granitoid(<65%)    |
| 17DC01-1-71  | 2.73  | 0.076 | 8.2  | 0.05 | 1.31  | 2.76  | 0.09 | 17.3 | 5.1  | 64.9  | 23.7 | 104.8 | 20.6 | 212 | 34.7  | 10584 | 1.25 | 183 | 115 | 86  | 2690  | Granitoid(<65%)    |
| 17DC01-1-72  | 6.43  | 0.010 | 27.6 | 0.05 | 1.60  | 3.64  | 0.30 | 19.2 | 7.2  | 92.7  | 36.2 | 174.7 | 37.0 | 408 | 67.5  | 11382 | 2.46 | 242 | 233 | 220 | 5420  | Granitoid(<65%)    |
| 17DC01-1-73  | 1.90  | 0.010 | 33.6 | 0.04 | 0.37  | 0.94  | 0.49 | 7.1  | 2.4  | 32.3  | 14.0 | 81.7  | 19.9 | 265 | 59.0  | 11360 | 1.07 | 468 | 305 | 301 | 7114  | Granitoid(<65%)    |
| 17DC01-1-74  | 1.42  | 0.048 | 3.3  | 0.07 | 1.22  | 3.62  | 0.29 | 27.7 | 10.4 | 138.3 | 52.4 | 257.3 | 51.9 | 529 | 88.0  | 11105 | 0.51 | 195 | 100 | 180 | 2326  | Granitoid(<70-75%) |
| 17DC01-1-75  | 0.47  | 0.000 | 15.3 | 0.00 | 0.20  | 1.53  | 0.11 | 6.9  | 3.0  | 45.8  | 18.7 | 98.6  | 21.0 | 237 | 42.2  | 10557 | 0.98 | 123 | 76  | 94  | 1783  | Granitoid(<65%)    |
| 17DC01-1-76  | 0.15  | 0.018 | 2.2  | 0.00 | 0.07  | 0.34  | 0.00 | 1.2  | 0.6  | 8.1   | 3.9  | 25.3  | 6.4  | 90  | 21.4  | 13786 | 0.58 | 44  | 14  | 102 | 326   | Granitoid(<65%)    |
| 17DC01-1-77  | 3.43  | 0.036 | 6.6  | 0.05 | 0.78  | 3.27  | 0.16 | 24.3 | 10.0 | 152.8 | 64.0 | 337.4 | 76.4 | 825 | 140.5 | 12444 | 1.77 | 208 | 170 | 301 | 3962  | Granitoid(<70-75%) |
| 17DC01-1-78  | 3.36  | 0.000 | 26.5 | 0.03 | 0.49  | 2.29  | 0.39 | 14.6 | 5.7  | 74.7  | 30.4 | 154.1 | 32.6 | 352 | 60.8  | 10732 | 1.50 | 274 | 179 | 190 | 4169  | Granitoid(<65%)    |
| 17DC01-1-79  | 0.72  | 0.047 | 10.0 | 0.10 | 1.53  | 3.08  | 0.87 | 13.5 | 4.2  | 54.9  | 19.4 | 91.5  | 18.3 | 198 | 34.5  | 9136  | 0.24 | 87  | 63  | 62  | 1476  | Dolerite           |
| 17DC01-1-80  | 3.19  | 0.000 | 24.9 | 0.05 | 0.57  | 2.79  | 0.42 | 14.9 | 6.2  | 84.9  | 32.1 | 167.1 | 34.8 | 380 | 67.3  | 10455 | 1.03 | 211 | 144 | 154 | 3346  | Granitoid(<65%)    |
| 17DC01-1-81  | 0.50  | 0.000 | 10.5 | 0.00 | 0.36  | 1.01  | 0.65 | 4.9  | 1.4  | 19.4  | 7.9  | 42.4  | 9.6  | 128 | 27.3  | 8973  | 0.24 | 178 | 85  | 167 | 1985  | Dolerite           |
| 17DC01-1-82  | 1.20  | 0.000 | 15.2 | 0.04 | 0.71  | 1.67  | 0.28 | 10.2 | 3.9  | 50.5  | 19.2 | 106.7 | 21.6 | 242 | 42.6  | 10117 | 0.83 | 119 | 77  | 83  | 1786  | Dolerite           |
| 17DC01-1-84  | 24.25 | 0.027 | 25.9 | 0.09 | 1.72  | 4.19  | 0.37 | 33.8 | 12.3 | 176.9 | 67.9 | 337.2 | 66.6 | 678 | 105.4 | 10679 | 7.78 | 338 | 269 | 495 | 6265  | Granitoid(<70-75%) |
| 17DC01-1-85  | 4.02  | 0.053 | 16.6 | 0.02 | 0.65  | 0.99  | 0.12 | 7.6  | 3.0  | 40.9  | 16.1 | 87.2  | 20.3 | 232 | 41.2  | 11773 | 2.31 | 381 | 220 | 255 | 5129  | Granitoid(<65%)    |
| 17DC01-1-86  | 1.95  | 0.000 | 7.0  | 0.05 | 0.87  | 2.28  | 0.11 | 9.5  | 3.1  | 39.0  | 13.1 | 62.1  | 12.0 | 135 | 22.1  | 10490 | 0.71 | 137 | 83  | 86  | 1940  | Granitoid(<65%)    |
| 17DC01-1-87  | 0.46  | 0.000 | 5.0  | 0.06 | 1.17  | 3.03  | 0.43 | 23.6 | 7.4  | 93.2  | 33.1 | 155.6 | 30.1 | 315 | 51.3  | 10466 | 0.87 | 178 | 99  | 129 | 2308  | Granitoid(<65%)    |
| 17DC01-1-88  | 4.00  | 0.058 | 30.3 | 0.04 | 0.72  | 1.93  | 0.34 | 12.2 | 5.2  | 77.1  | 30.8 | 155.9 | 32.3 | 371 | 61.1  | 10882 | 2.03 | 265 | 165 | 196 | 3853  | Granitoid(<65%)    |
| 17DC01-1-89  | 1.69  | 0.375 | 17.4 | 0.14 | 1.04  | 2.09  | 0.33 | 13.3 | 5.4  | 66.8  | 26.2 | 134.7 | 28.4 | 297 | 50.7  | 10622 | 1.05 | 231 | 146 | 158 | 3404  | Granitoid(<65%)    |
| 17DC01-1-90  | 1.26  | 0.050 | 17.2 | 0.05 | 0.43  | 2.02  | 0.18 | 11.2 | 3.7  | 58.1  | 22.3 | 115.2 | 25.8 | 287 | 50.2  | 10668 | 0.89 | 147 | 91  | 108 | 2127  | Granitoid(<65%)    |
| 17DC01-1-91  | 0.01  | 0.024 | 6.3  | 0.11 | 2.23  | 6.22  | 0.24 | 46.3 | 17.6 | 237.9 | 89.3 | 423.1 | 82.7 | 871 | 139.5 | 10994 | 1.29 | 571 | 275 | 574 | 6421  | Granitoid(<70-75%) |
| 17DC01-1-93  | 1.93  | 0.061 | 22.9 | 0.00 | 0.65  | 2.13  | 0.27 | 14.0 | 5.4  | 76.5  | 30.8 | 151.2 | 32.8 | 359 | 63.2  | 11000 | 1.43 | 239 | 156 | 173 | 3636  | Granitoid(<65%)    |
| 17DC01-1-94  | 6.18  | 0.338 | 51.2 | 0.12 | 1.07  | 1.19  | 0.35 | 9.1  | 3.3  | 50.7  | 21.0 | 136.1 | 35.0 | 470 | 92.4  | 11460 | 2.93 | 600 | 574 | 531 | 13388 | Granitoid(<65%)    |
| 17DC01-1-95  | 2.92  | 0.176 | 26.0 | 0.08 | 1.44  | 2.57  | 0.38 | 16.6 | 5.7  | 80.2  | 30.0 | 153.9 | 31.9 | 353 | 61.5  | 10520 | 1.41 | 204 | 137 | 137 | 3183  | Granitoid(<65%)    |
| 17DC01-1-96  | 1.40  | 0.000 | 3.0  | 0.04 | 1.06  | 3.11  | 0.19 | 26.4 | 9.4  | 133.0 | 50.4 | 245.7 | 49.8 | 526 | 87.9  | 11562 | 0.57 | 185 | 88  | 202 | 2047  | Granitoid(<70-75%) |
| 17DC01-1-97  | 0.00  | 0.000 | 8.6  | 0.02 | 0.58  | 1.53  | 0.80 | 8.4  | 2.8  | 36.5  | 14.4 | 81.4  | 17.6 | 221 | 45.5  | 7961  | 0.12 | 161 | 47  | 60  | 1087  | basalt             |
| 17DC01-1-98  | 1.52  | 0.063 | 8.2  | 0.09 | 0.93  | 1.77  | 0.25 | 8.9  | 3.6  | 44.0  | 16.8 | 82.5  | 16.2 | 171 | 29.2  | 10037 | 0.80 | 83  | 53  | 41  | 1246  | Dolerite           |
| 17DC01-1-99  | 0.49  | 0.000 | 4.9  | 0.18 | 2.69  | 7.97  | 0.06 | 33.4 | 7.7  | 48.4  | 8.5  | 19.4  | 2.0  | 14  | 1.5   | 11200 | 0.36 | 271 | 168 | 134 | 3908  | Kimberlite         |
| 17DC01-1-100 | 0.81  | 0.000 | 19.5 | 0.07 | 0.90  | 3.30  | 0.39 | 17.0 | 6.6  | 91.2  | 35.5 | 176.6 | 36.7 | 408 | 69.8  | 9884  | 0.76 | 183 | 127 | 119 | 2949  | Dolerite           |
| 17DC02-1-01  | 1.23  | 0.014 | 0.9  | 0.00 | 0.05  | 0.09  | 0.10 | 0.9  | 0.7  | 11.7  | 5.7  | 35.1  | 9.3  | 129 | 26.6  | 9033  | 0.66 | 51  | 2   | 266 | 38    | Dolerite           |
| 17DC02-1-02  | 1.54  | 0.009 | 11.5 | 0.07 | 1.12  | 2.37  | 0.34 | 14.0 | 5.2  | 64.6  | 24.1 | 112.5 | 24.1 | 255 | 41.1  | 9405  | 1.10 | 113 | 102 | 117 | 2517  | Dolerite           |
| 17DC02-1-03  | 2.98  | 0.000 | 17.8 | 0.06 | 1.11  | 2.50  | 0.15 | 14.7 | 5.8  | 75.4  | 28.0 | 137.1 | 29.0 | 309 | 48.5  | 9488  | 2.05 | 500 | 410 | 621 | 10154 | Dolerite           |
| 17DC02-1-04  | 3.94  | 0.012 | 27.7 | 0.05 | 1.31  | 2.91  | 0.45 | 17.1 | 6.4  | 81.8  | 31.5 | 155.2 | 34.0 | 370 | 61.3  | 9368  | 1.85 | 160 | 102 | 125 | 2527  | Dolerite           |
| 17DC02-1-05  | 3.40  | 0.045 | 22.5 | 0.06 | 1.26  | 2.34  | 0.20 | 16.3 | 6.1  | 79.4  | 30.5 | 154.0 | 32.3 | 351 | 56.7  | 9604  | 1.73 | 250 | 160 | 190 | 3967  | Dolerite           |



|             |      |       |      |      |       |       |      |       |      |       |       |       |       |      |       |       |      |     |     |     |       |                   |
|-------------|------|-------|------|------|-------|-------|------|-------|------|-------|-------|-------|-------|------|-------|-------|------|-----|-----|-----|-------|-------------------|
| 17DC02-1-06 | 0.85 | 0.012 | 18.8 | 0.05 | 0.99  | 2.72  | 0.42 | 13.0  | 4.8  | 61.7  | 22.2  | 112.2 | 24.0  | 272  | 44.3  | 9248  | 0.57 | 197 | 149 | 146 | 3702  | Dolerite          |
| 17DC02-1-07 | 1.07 | 0.050 | 13.2 | 0.44 | 6.79  | 11.34 | 1.37 | 54.3  | 17.1 | 215.2 | 77.0  | 360.0 | 73.1  | 758  | 119.4 | 8581  | 0.61 | 358 | 280 | 247 | 6947  | Dolerite          |
| 17DC02-1-08 | 3.11 | 0.013 | 6.1  | 0.06 | 1.49  | 3.00  | 0.23 | 15.4  | 5.8  | 71.3  | 26.5  | 122.5 | 25.1  | 260  | 41.1  | 9467  | 1.59 | 158 | 137 | 185 | 3406  | Dolerite          |
| 17DC02-1-09 | 1.34 | 0.012 | 17.9 | 0.28 | 4.48  | 7.48  | 1.53 | 34.8  | 10.7 | 122.6 | 41.0  | 185.0 | 37.3  | 379  | 61.5  | 8423  | 0.67 | 279 | 163 | 130 | 4026  | Dolerite          |
| 17DC02-1-10 | 4.29 | 0.000 | 21.1 | 0.07 | 1.48  | 3.49  | 0.18 | 21.0  | 7.4  | 102.6 | 38.0  | 189.3 | 39.4  | 424  | 68.2  | 9920  | 2.10 | 285 | 183 | 228 | 4538  | Dolerite          |
| 17DC02-1-11 | 4.29 | 0.020 | 20.5 | 0.04 | 1.29  | 2.68  | 0.24 | 15.8  | 5.8  | 73.4  | 27.5  | 135.1 | 29.6  | 329  | 54.4  | 9144  | 2.28 | 279 | 163 | 374 | 4026  | Dolerite          |
| 17DC02-1-12 | 4.51 | 0.007 | 47.3 | 0.02 | 0.59  | 1.10  | 0.21 | 6.4   | 2.5  | 35.1  | 15.4  | 88.9  | 23.6  | 301  | 58.9  | 9835  | 1.85 | 250 | 174 | 187 | 4315  | Dolerite          |
| 17DC02-1-14 | 1.76 | 0.024 | 45.9 | 0.21 | 3.59  | 5.38  | 1.57 | 17.7  | 4.4  | 41.7  | 11.5  | 47.4  | 9.0   | 89   | 14.1  | 7548  | 0.61 | 487 | 273 | 251 | 6764  | carbonate         |
| 17DC02-1-15 | 0.41 | 0.039 | 7.9  | 0.35 | 4.35  | 7.27  | 1.39 | 33.0  | 10.5 | 128.6 | 47.4  | 228.5 | 46.7  | 499  | 83.5  | 8081  | 0.33 | 137 | 105 | 120 | 2607  | Dolerite          |
| 17DC02-1-16 | 1.52 | 0.000 | 9.5  | 0.05 | 1.35  | 3.67  | 0.37 | 23.5  | 10.1 | 144.6 | 58.9  | 300.7 | 67.6  | 746  | 126.7 | 9920  | 0.98 | 222 | 116 | 182 | 2870  | Dolerite          |
| 17DC02-1-17 | 3.05 | 0.000 | 8.3  | 0.06 | 1.46  | 3.00  | 0.14 | 16.4  | 5.3  | 71.8  | 27.2  | 129.2 | 25.8  | 272  | 44.4  | 9974  | 1.25 | 183 | 112 | 92  | 2783  | Dolerite          |
| 17DC02-1-18 | 1.03 | 0.055 | 6.3  | 0.36 | 5.47  | 8.45  | 0.33 | 38.0  | 11.1 | 126.2 | 41.5  | 171.9 | 32.0  | 298  | 45.0  | 7692  | 0.66 | 203 | 130 | 106 | 3220  | basalt            |
| 17DC02-1-19 | 2.67 | 0.030 | 12.7 | 0.07 | 0.97  | 2.37  | 0.28 | 13.7  | 4.9  | 64.9  | 24.3  | 114.9 | 24.6  | 261  | 42.1  | 8934  | 1.04 | 75  | 69  | 72  | 1702  | Dolerite          |
| 17DC02-1-20 | 1.22 | 0.002 | 11.0 | 0.05 | 0.94  | 2.88  | 0.37 | 18.1  | 6.6  | 89.3  | 33.5  | 161.1 | 33.5  | 345  | 56.2  | 9234  | 0.79 | 212 | 135 | 169 | 3352  | Dolerite          |
| 17DC02-1-21 | 0.31 | 0.001 | 5.6  | 0.01 | 0.09  | 0.33  | 0.09 | 1.5   | 0.5  | 8.4   | 3.7   | 22.3  | 6.0   | 80   | 16.0  | 10077 | 0.22 | 106 | 67  | 104 | 1669  | carbonate         |
| 17DC02-1-22 | 0.50 | 0.014 | 7.2  | 0.08 | 1.63  | 2.83  | 1.53 | 16.7  | 5.8  | 69.4  | 26.7  | 128.9 | 28.3  | 332  | 61.3  | 9064  | 0.19 | 88  | 59  | 123 | 1472  | Dolerite          |
| 17DC02-1-23 | 2.88 | 0.000 | 11.4 | 0.05 | 1.17  | 2.34  | 0.19 | 16.4  | 6.2  | 81.9  | 30.8  | 154.8 | 33.1  | 353  | 59.0  | 9627  | 1.23 | 176 | 114 | 186 | 2820  | Dolerite          |
| 17DC02-1-24 | 2.00 | 0.002 | 14.3 | 0.10 | 1.72  | 4.70  | 0.87 | 32.5  | 12.4 | 148.9 | 49.0  | 203.4 | 37.2  | 353  | 53.2  | 10741 | 1.23 | 215 | 133 | 142 | 3295  | Granitoid(<65%)   |
| 17DC02-1-25 | 1.84 | 0.067 | 21.9 | 0.07 | 1.09  | 1.57  | 0.37 | 10.4  | 3.4  | 44.8  | 17.0  | 83.6  | 18.3  | 204  | 34.9  | 9846  | 0.90 | 95  | 85  | 77  | 2107  | Dolerite          |
| 17DC02-1-26 | 0.92 | 0.100 | 25.4 | 0.67 | 9.80  | 12.80 | 2.23 | 42.8  | 11.1 | 115.5 | 35.4  | 145.7 | 26.7  | 261  | 41.1  | 7941  | 0.29 | 380 | 170 | 106 | 4216  | basalt            |
| 17DC02-1-27 | 0.30 | 0.000 | 8.3  | 0.03 | 0.73  | 1.20  | 0.54 | 5.1   | 1.8  | 24.8  | 10.2  | 60.4  | 16.0  | 220  | 46.6  | 6327  | 0.16 | 144 | 90  | 100 | 2228  | basalt            |
| 17DC02-1-28 | 1.35 | 0.000 | 11.5 | 0.02 | 0.60  | 1.40  | 0.28 | 8.5   | 2.7  | 33.6  | 12.0  | 59.9  | 13.0  | 146  | 25.5  | 9945  | 1.19 | 271 | 121 | 338 | 2992  | Dolerite          |
| 17DC02-1-29 | 1.50 | 0.014 | 19.6 | 0.07 | 1.37  | 1.81  | 0.38 | 9.0   | 2.7  | 33.7  | 12.0  | 57.3  | 12.3  | 136  | 24.0  | 9519  | 0.56 | 97  | 55  | 39  | 1354  | Dolerite          |
| 17DC02-1-30 | 0.85 | 0.000 | 21.8 | 0.04 | 1.16  | 2.61  | 0.71 | 12.7  | 4.0  | 48.3  | 17.3  | 83.2  | 17.8  | 198  | 35.4  | 8220  | 0.48 | 94  | 63  | 70  | 1572  | Dolerite          |
| 17DC02-1-31 | 3.69 | 0.002 | 12.4 | 0.04 | 0.73  | 3.46  | 0.39 | 24.7  | 10.0 | 131.3 | 44.7  | 197.9 | 38.5  | 380  | 57.8  | 9978  | 2.32 | 274 | 210 | 403 | 5201  | Dolerite          |
| 17DC02-1-32 | 5.05 | 0.004 | 23.1 | 0.12 | 2.79  | 5.21  | 0.77 | 25.7  | 8.2  | 106.6 | 37.3  | 170.2 | 36.2  | 370  | 59.8  | 9190  | 2.24 | 296 | 266 | 246 | 6589  | Dolerite          |
| 17DC02-1-33 | 4.37 | 0.007 | 25.7 | 0.08 | 1.74  | 3.56  | 0.32 | 21.4  | 7.0  | 90.7  | 33.9  | 163.0 | 34.4  | 359  | 58.0  | 9260  | 1.61 | 208 | 128 | 192 | 3171  | Dolerite          |
| 17DC02-1-34 | 1.00 | 0.000 | 17.6 | 0.04 | 0.93  | 2.40  | 0.45 | 11.2  | 3.4  | 40.0  | 13.3  | 60.9  | 12.4  | 130  | 20.7  | 8474  | 0.39 | 138 | 64  | 128 | 1593  | carbonate         |
| 17DC02-1-35 | 2.76 | 0.000 | 36.1 | 0.11 | 2.19  | 3.89  | 0.90 | 19.5  | 6.0  | 78.1  | 27.6  | 134.5 | 28.8  | 313  | 53.5  | 8745  | 1.08 | 142 | 67  | 100 | 1661  | Dolerite          |
| 17DC02-1-36 | 1.04 | 0.013 | 18.1 | 0.05 | 1.03  | 2.45  | 0.42 | 13.5  | 4.5  | 58.6  | 21.9  | 110.7 | 24.2  | 272  | 45.4  | 9597  | 0.46 | 168 | 131 | 113 | 3234  | Dolerite          |
| 17DC02-1-37 | 1.57 | 0.000 | 7.6  | 0.04 | 0.99  | 2.22  | 0.60 | 13.9  | 4.6  | 58.9  | 21.7  | 99.8  | 21.0  | 218  | 35.4  | 7831  | 0.56 | 66  | 38  | 101 | 941   | basalt            |
| 17DC02-1-38 | 2.05 | 0.006 | 15.3 | 0.06 | 1.14  | 2.46  | 0.45 | 17.2  | 6.2  | 86.4  | 32.3  | 159.8 | 33.8  | 375  | 63.2  | 8939  | 0.85 | 149 | 99  | 132 | 2451  | Dolerite          |
| 17DC02-1-39 | 3.16 | 0.022 | 29.0 | 0.08 | 1.65  | 3.59  | 0.54 | 20.4  | 7.1  | 93.7  | 33.7  | 159.0 | 32.9  | 355  | 58.3  | 9347  | 1.22 | 136 | 101 | 127 | 2506  | Dolerite          |
| 17DC02-1-40 | 2.55 | 0.000 | 10.5 | 0.04 | 0.68  | 2.07  | 0.18 | 10.6  | 4.4  | 56.8  | 20.9  | 101.1 | 21.8  | 235  | 38.2  | 9272  | 1.56 | 171 | 140 | 202 | 3471  | Dolerite          |
| 17DC02-1-41 | 3.91 | 0.011 | 19.8 | 0.06 | 1.06  | 2.67  | 0.16 | 16.1  | 5.9  | 77.5  | 27.9  | 134.2 | 27.8  | 304  | 48.9  | 9354  | 1.60 | 215 | 118 | 314 | 2930  | Dolerite          |
| 17DC02-1-42 | 3.09 | 0.004 | 10.1 | 0.07 | 1.76  | 5.26  | 0.26 | 29.5  | 9.3  | 111.1 | 37.7  | 169.8 | 32.8  | 324  | 48.3  | 9335  | 1.12 | 311 | 187 | 146 | 4641  | Dolerite          |
| 17DC02-1-43 | 0.76 | 0.011 | 3.1  | 0.06 | 1.15  | 3.67  | 0.14 | 12.5  | 2.5  | 17.8  | 3.7   | 11.6  | 1.6   | 15   | 1.9   | 10916 | 0.57 | 241 | 117 | 269 | 2894  | Kimberlite        |
| 17DC02-1-44 | 0.84 | 0.014 | 9.6  | 0.11 | 1.98  | 3.61  | 0.68 | 18.4  | 6.0  | 72.9  | 26.0  | 129.2 | 27.5  | 302  | 52.0  | 7909  | 0.50 | 144 | 115 | 137 | 2854  | basalt            |
| 17DC02-1-45 | 1.47 | 0.000 | 21.7 | 0.07 | 1.15  | 2.72  | 1.21 | 15.3  | 4.8  | 63.8  | 26.7  | 145.8 | 34.4  | 423  | 79.7  | 7950  | 0.54 | 165 | 96  | 173 | 2389  | basalt            |
| 17DC02-1-46 | 7.80 | 0.087 | 64.1 | 0.92 | 14.30 | 22.46 | 1.43 | 112.7 | 35.4 | 428.4 | 149.3 | 665.8 | 132.2 | 1332 | 202.1 | 8112  | 2.65 | 654 | 669 | 352 | 16581 | syenite/monzonite |
| 17DC02-1-47 | 0.26 | 0.011 | 6.7  | 0.10 | 1.09  | 1.75  | 0.82 | 9.0   | 3.0  | 38.0  | 14.2  | 69.5  | 15.3  | 170  | 28.4  | 7168  | 0.31 | 244 | 188 | 126 | 4669  | basalt            |
| 17DC02-1-48 | 6.90 | 0.000 | 16.9 | 0.06 | 1.10  | 2.77  | 0.10 | 15.4  | 5.6  | 71.2  | 27.7  | 135.7 | 28.4  | 308  | 48.8  | 9631  | 3.19 | 188 | 111 | 297 | 2758  | Dolerite          |

|             |       |       |      |      |       |       |      |      |      |       |      |       |      |     |       |       |      |      |     |     |       |                    |
|-------------|-------|-------|------|------|-------|-------|------|------|------|-------|------|-------|------|-----|-------|-------|------|------|-----|-----|-------|--------------------|
| 17DC02-1-49 | 2.17  | 0.017 | 20.6 | 0.02 | 0.75  | 1.61  | 0.33 | 11.1 | 4.5  | 64.6  | 24.2 | 124.0 | 26.9 | 294 | 50.6  | 9524  | 1.18 | 182  | 116 | 125 | 2873  | Dolerite           |
| 17DC02-1-50 | 1.10  | 0.003 | 7.8  | 0.11 | 2.30  | 3.79  | 0.59 | 16.5 | 4.8  | 57.4  | 20.0 | 90.4  | 18.7 | 194 | 31.3  | 6984  | 0.57 | 126  | 71  | 85  | 1754  | basalt             |
| 17DC02-1-51 | 1.53  | 0.000 | 8.3  | 0.05 | 1.14  | 3.41  | 0.16 | 16.6 | 5.4  | 67.9  | 24.0 | 111.5 | 21.7 | 227 | 35.5  | 9526  | 0.87 | 325  | 183 | 234 | 4539  | Dolerite           |
| 17DC02-1-52 | 2.71  | 0.000 | 25.4 | 0.02 | 1.09  | 3.40  | 0.37 | 19.9 | 8.1  | 106.9 | 41.4 | 207.1 | 45.8 | 504 | 83.6  | 9469  | 1.63 | 222  | 141 | 149 | 3491  | Dolerite           |
| 17DC02-1-53 | 3.51  | 0.041 | 43.4 | 0.07 | 1.03  | 2.55  | 0.52 | 13.4 | 4.9  | 66.0  | 25.3 | 126.8 | 27.5 | 310 | 51.9  | 9286  | 1.84 | 235  | 214 | 195 | 5298  | Dolerite           |
| 17DC02-1-54 | 3.17  | 0.000 | 29.2 | 0.04 | 0.83  | 2.06  | 0.35 | 11.3 | 4.7  | 57.4  | 22.1 | 106.7 | 22.1 | 241 | 39.5  | 10009 | 1.57 | 263  | 148 | 118 | 3667  | Dolerite           |
| 17DC02-1-55 | 3.75  | 0.021 | 31.1 | 0.07 | 1.73  | 3.69  | 1.32 | 24.0 | 8.3  | 110.3 | 40.7 | 196.7 | 41.9 | 442 | 74.5  | 9907  | 1.90 | 400  | 277 | 318 | 6853  | Dolerite           |
| 17DC02-1-56 | 3.06  | 0.172 | 24.0 | 0.07 | 1.08  | 3.30  | 0.23 | 17.5 | 6.4  | 84.2  | 31.3 | 146.7 | 30.4 | 321 | 52.0  | 9401  | 1.64 | 350  | 272 | 410 | 6730  | Dolerite           |
| 17DC02-1-57 | 0.39  | 0.080 | 40.2 | 0.83 | 11.01 | 15.14 | 7.31 | 51.0 | 11.7 | 107.1 | 31.7 | 127.9 | 24.4 | 259 | 42.6  | 6133  | 0.19 | 1058 | 384 | 227 | 9509  | basalt             |
| 17DC02-1-58 | 1.66  | 0.107 | 12.1 | 0.10 | 1.28  | 2.01  | 0.27 | 10.9 | 4.3  | 52.7  | 20.0 | 93.8  | 19.5 | 201 | 34.3  | 8951  | 0.97 | 163  | 97  | 118 | 2399  | Dolerite           |
| 17DC02-1-59 | 0.95  | 0.009 | 7.1  | 0.02 | 0.47  | 1.33  | 0.54 | 14.1 | 5.6  | 81.5  | 32.9 | 160.3 | 34.1 | 356 | 61.0  | 9157  | 0.62 | 174  | 75  | 231 | 1853  | Dolerite           |
| 17DC02-1-60 | 1.08  | 0.095 | 5.9  | 0.08 | 1.67  | 3.15  | 0.72 | 21.4 | 7.7  | 96.9  | 37.3 | 179.5 | 38.1 | 415 | 74.6  | 8092  | 0.60 | 99   | 73  | 112 | 1817  | Dolerite           |
| 17DC02-1-61 | 2.24  | 0.026 | 14.2 | 0.03 | 0.99  | 2.50  | 0.33 | 14.7 | 5.3  | 71.9  | 26.7 | 127.0 | 26.7 | 284 | 45.6  | 9423  | 1.28 | 294  | 177 | 234 | 4378  | Dolerite           |
| 17DC02-1-62 | 1.20  | 0.048 | 6.0  | 0.07 | 1.15  | 2.77  | 0.10 | 15.2 | 4.9  | 60.6  | 21.7 | 100.7 | 19.4 | 210 | 32.0  | 8965  | 0.65 | 206  | 85  | 185 | 2101  | Dolerite           |
| 17DC02-1-63 | 11.95 | 0.017 | 73.1 | 0.08 | 1.19  | 2.57  | 0.25 | 14.5 | 6.0  | 93.8  | 40.5 | 237.9 | 60.2 | 714 | 121.0 | 10640 | 4.40 | 989  | 707 | 506 | 17508 | Granitoid(<70-75%) |
| 17DC02-1-64 | 1.26  | 0.012 | 8.2  | 0.02 | 0.93  | 1.53  | 0.11 | 10.0 | 3.7  | 50.4  | 19.0 | 94.5  | 20.5 | 225 | 37.1  | 7981  | 0.84 | 167  | 84  | 137 | 2088  | basalt             |
| 17DC02-1-65 | 0.77  | 0.015 | 14.5 | 0.07 | 1.17  | 1.40  | 0.41 | 5.4  | 2.0  | 29.1  | 12.6 | 77.4  | 23.1 | 333 | 62.5  | 10370 | 0.66 | 299  | 96  | 282 | 2366  | Granitoid(<65%)    |
| 17DC02-1-66 | 1.61  | 0.086 | 33.6 | 0.51 | 8.88  | 16.50 | 4.94 | 66.2 | 18.9 | 202.0 | 64.2 | 278.6 | 56.1 | 557 | 84.8  | 8641  | 0.68 | 790  | 621 | 276 | 15389 | Dolerite           |
| 17DC02-1-67 | 0.91  | 0.024 | 6.7  | 0.03 | 0.65  | 1.35  | 0.20 | 9.3  | 3.1  | 41.0  | 15.6 | 76.6  | 16.1 | 171 | 27.0  | 9524  | 0.66 | 139  | 62  | 108 | 1526  | Dolerite           |
| 17DC02-1-68 | 2.04  | 0.009 | 15.0 | 0.20 | 3.12  | 6.44  | 0.96 | 30.4 | 9.9  | 122.2 | 42.6 | 188.5 | 38.9 | 400 | 61.5  | 9425  | 1.15 | 188  | 179 | 151 | 4432  | Dolerite           |
| 17DC02-1-69 | 0.23  | 0.089 | 20.9 | 0.06 | 1.14  | 2.13  | 0.68 | 8.1  | 2.4  | 28.4  | 9.9  | 49.3  | 10.9 | 129 | 22.6  | 8822  | 0.14 | 167  | 112 | 91  | 2762  | Dolerite           |
| 17DC02-1-70 | 1.24  | 0.059 | 7.3  | 0.45 | 7.47  | 12.04 | 1.48 | 53.8 | 16.5 | 189.6 | 63.7 | 267.8 | 51.8 | 500 | 76.6  | 8350  | 0.64 | 123  | 59  | 138 | 1467  | Dolerite           |
| 17DC02-1-71 | 0.74  | 0.000 | 10.6 | 0.02 | 0.68  | 1.26  | 0.25 | 5.9  | 1.9  | 22.4  | 8.0  | 37.8  | 8.1  | 90  | 14.4  | 8525  | 0.29 | 202  | 76  | 101 | 1895  | carbonate          |
| 17DC02-1-72 | 5.79  | 0.115 | 31.4 | 0.08 | 1.15  | 2.40  | 0.21 | 18.0 | 7.2  | 101.3 | 40.3 | 207.8 | 46.9 | 542 | 87.2  | 10388 | 3.88 | 627  | 378 | 566 | 9353  | Granitoid(<70-75%) |
| 17DC02-1-73 | 2.89  | 0.000 | 17.1 | 0.02 | 0.71  | 1.95  | 0.19 | 12.6 | 4.6  | 66.1  | 24.6 | 122.1 | 26.7 | 299 | 48.2  | 10082 | 1.78 | 271  | 227 | 305 | 5615  | Dolerite           |
| 17DC02-1-74 | 0.66  | 0.000 | 12.6 | 0.08 | 1.73  | 3.70  | 0.76 | 21.9 | 8.2  | 117.0 | 44.2 | 218.1 | 49.1 | 539 | 82.3  | 9251  | 0.36 | 97   | 70  | 86  | 1734  | Dolerite           |
| 17DC02-1-75 | 2.47  | 0.000 | 46.7 | 0.04 | 0.41  | 0.80  | 0.31 | 3.0  | 1.1  | 15.4  | 6.4  | 38.8  | 10.6 | 144 | 27.9  | 9565  | 0.69 | 226  | 146 | 223 | 3617  | Dolerite           |
| 17DC02-1-76 | 0.47  | 0.006 | 12.1 | 0.04 | 1.08  | 2.92  | 0.50 | 17.5 | 5.8  | 74.4  | 28.9 | 139.5 | 29.6 | 328 | 53.1  | 9184  | 0.31 | 91   | 65  | 58  | 1622  | Dolerite           |
| 17DC02-1-77 | 4.33  | 0.058 | 13.5 | 0.49 | 8.54  | 14.49 | 0.56 | 63.4 | 18.7 | 205.4 | 67.5 | 286.4 | 54.3 | 533 | 79.2  | 9441  | 2.14 | 202  | 132 | 106 | 3280  | Dolerite           |
| 17DC02-1-78 | 5.36  | 0.000 | 38.6 | 0.08 | 1.23  | 3.58  | 0.22 | 21.3 | 6.3  | 71.3  | 24.3 | 105.0 | 20.1 | 203 | 30.2  | 10316 | 1.75 | 484  | 295 | 71  | 7306  | Granitoid(<65%)    |
| 17DC02-1-79 | 0.70  | 0.000 | 20.2 | 0.05 | 1.14  | 2.59  | 0.68 | 11.1 | 3.4  | 37.1  | 12.7 | 57.7  | 12.1 | 129 | 20.9  | 9653  | 0.40 | 112  | 77  | 69  | 1898  | Dolerite           |
| 17DC02-1-80 | 2.92  | 0.000 | 17.7 | 0.06 | 1.36  | 2.45  | 0.18 | 13.6 | 4.8  | 59.7  | 22.5 | 105.2 | 22.8 | 252 | 39.9  | 9082  | 1.25 | 96   | 93  | 88  | 2295  | Dolerite           |
| 17DC02-1-81 | 1.02  | 0.031 | 10.2 | 0.25 | 4.43  | 7.33  | 0.39 | 27.2 | 8.0  | 86.3  | 28.5 | 124.0 | 24.7 | 260 | 38.2  | 8477  | 0.52 | 277  | 259 | 327 | 6418  | Dolerite           |
| 17DC02-1-82 | 0.71  | 0.007 | 15.5 | 0.21 | 3.21  | 5.14  | 1.05 | 20.3 | 5.9  | 64.2  | 21.0 | 91.0  | 17.9 | 180 | 27.5  | 8140  | 0.50 | 231  | 107 | 101 | 2641  | Dolerite           |
| 17DC02-1-83 | 2.48  | 0.000 | 23.8 | 0.04 | 0.87  | 2.10  | 0.50 | 15.7 | 5.8  | 79.5  | 30.3 | 149.8 | 32.2 | 354 | 58.3  | 9212  | 1.13 | 180  | 116 | 120 | 2885  | Dolerite           |
| 17DC02-1-84 | 1.71  | 0.060 | 6.0  | 0.46 | 7.56  | 11.94 | 0.57 | 62.0 | 20.3 | 258.4 | 97.8 | 447.6 | 89.8 | 895 | 133.8 | 8910  | 0.87 | 528  | 284 | 241 | 7031  | Dolerite           |
| 17DC02-1-85 | 2.92  | 0.016 | 28.9 | 0.07 | 1.65  | 2.91  | 0.35 | 18.6 | 6.8  | 86.5  | 31.4 | 150.9 | 32.4 | 347 | 55.2  | 9926  | 1.73 | 297  | 272 | 273 | 6737  | Dolerite           |
| 17DC02-1-86 | 2.54  | 0.000 | 27.9 | 0.06 | 0.85  | 2.60  | 0.38 | 14.4 | 5.2  | 69.2  | 26.5 | 134.0 | 30.3 | 342 | 58.4  | 9677  | 1.40 | 249  | 170 | 164 | 4208  | Dolerite           |
| 17DC02-1-87 | 1.20  | 0.022 | 9.5  | 0.23 | 4.00  | 6.81  | 0.40 | 24.7 | 6.7  | 72.8  | 23.5 | 101.0 | 19.4 | 203 | 30.9  | 9418  | 0.43 | 534  | 234 | 125 | 5787  | Dolerite           |
| 17DC02-1-88 | 2.46  | 0.283 | 10.1 | 0.12 | 0.84  | 1.88  | 0.11 | 11.5 | 3.8  | 47.0  | 17.3 | 81.9  | 16.4 | 173 | 28.5  | 9375  | 0.80 | 145  | 76  | 88  | 1888  | Dolerite           |
| 17DC02-1-89 | 2.04  | 0.024 | 8.2  | 0.05 | 0.85  | 2.35  | 0.16 | 18.9 | 7.5  | 98.9  | 39.1 | 185.4 | 37.7 | 379 | 54.5  | 10691 | 1.17 | 148  | 94  | 300 | 2337  | Granitoid(<65%)    |
| 17DC02-1-90 | 4.07  | 0.000 | 32.1 | 0.02 | 0.55  | 1.57  | 0.22 | 9.4  | 3.5  | 47.8  | 21.2 | 108.3 | 25.8 | 306 | 53.7  | 11231 | 2.23 | 134  | 95  | 95  | 2351  | Granitoid(<65%)    |

|              |      |       |      |      |       |       |      |      |      |       |      |       |      |     |       |       |      |     |     |     |       |                    |
|--------------|------|-------|------|------|-------|-------|------|------|------|-------|------|-------|------|-----|-------|-------|------|-----|-----|-----|-------|--------------------|
| 17DC02-1-91  | 1.41 | 0.024 | 15.2 | 0.06 | 1.48  | 2.58  | 0.58 | 12.2 | 3.5  | 38.4  | 14.2 | 66.6  | 14.9 | 155 | 26.6  | 8515  | 0.74 | 142 | 72  | 140 | 1783  | Dolerite           |
| 17DC02-1-92  | 0.72 | 0.000 | 0.8  | 0.00 | 0.09  | 0.04  | 0.05 | 1.1  | 0.4  | 11.2  | 6.8  | 55.0  | 18.7 | 320 | 88.5  | 11997 | 0.42 | 51  | 1   | 249 | 25    | Granitoid(<65%)    |
| 17DC02-1-93  | 0.57 | 0.007 | 0.4  | 0.00 | 0.06  | 0.18  | 0.14 | 1.9  | 1.1  | 17.9  | 9.0  | 51.1  | 14.0 | 185 | 40.3  | 11621 | 0.30 | 76  | 3   | 369 | 73    | Granitoid(<65%)    |
| 17DC02-1-94  | 0.52 | 0.045 | 4.8  | 0.02 | 0.31  | 0.56  | 0.37 | 5.1  | 1.9  | 25.8  | 11.0 | 60.0  | 15.0 | 177 | 33.5  | 9861  | 0.24 | 63  | 37  | 63  | 924   | Dolerite           |
| 17DC02-1-95  | 0.94 | 0.072 | 15.0 | 0.54 | 7.92  | 12.36 | 0.97 | 59.3 | 18.1 | 214.9 | 74.1 | 336.6 | 66.1 | 659 | 105.4 | 10316 | 1.04 | 616 | 411 | 384 | 10191 | Granitoid(<70-75%) |
| 17DC02-1-96  | 0.98 | 0.020 | 12.3 | 0.07 | 1.20  | 2.08  | 0.61 | 16.0 | 5.4  | 69.8  | 26.5 | 125.1 | 25.7 | 274 | 46.1  | 9664  | 0.77 | 126 | 77  | 73  | 1909  | Dolerite           |
| 17DC02-1-97  | 1.34 | 0.000 | 6.0  | 0.20 | 3.70  | 7.72  | 0.29 | 47.8 | 16.9 | 215.0 | 79.8 | 366.6 | 73.0 | 706 | 110.9 | 10976 | 1.12 | 624 | 370 | 477 | 9167  | Granitoid(<70-75%) |
| 17DC02-1-99  | 3.18 | 0.004 | 48.8 | 0.07 | 1.20  | 2.68  | 0.97 | 18.0 | 5.7  | 74.1  | 29.0 | 145.3 | 32.5 | 356 | 62.6  | 9522  | 1.18 | 317 | 226 | 176 | 5594  | Dolerite           |
| 17DC02-1-100 | 2.24 | 0.017 | 3.9  | 0.02 | 0.35  | 1.83  | 0.23 | 14.4 | 5.1  | 62.8  | 21.1 | 92.4  | 17.6 | 174 | 27.0  | 10602 | 2.20 | 412 | 182 | 532 | 4508  | Granitoid(<65%)    |
| 17DC03-1-01  | 0.88 | 0.000 | 0.6  | 0.03 | 0.69  | 1.92  | 0.36 | 15.4 | 5.0  | 52.7  | 13.9 | 46.7  | 6.9  | 61  | 9.0   | 12081 | 0.38 | 153 | 25  | 251 | 578   | carbonate          |
| 17DC03-1-02  | 4.51 | 0.026 | 14.0 | 0.06 | 0.49  | 1.40  | 0.20 | 14.6 | 4.8  | 72.6  | 28.8 | 150.8 | 30.4 | 358 | 57.0  | 11511 | 1.60 | 170 | 109 | 138 | 2559  | Granitoid(<65%)    |
| 17DC03-1-04  | 4.92 | 0.000 | 35.3 | 0.02 | 1.16  | 3.70  | 0.42 | 23.5 | 7.8  | 115.6 | 44.9 | 232.2 | 47.6 | 538 | 87.1  | 11843 | 2.32 | 426 | 288 | 289 | 6731  | Granitoid(<70-75%) |
| 17DC03-1-05  | 2.44 | 0.033 | 18.5 | 0.07 | 1.09  | 2.11  | 0.45 | 12.5 | 4.4  | 56.9  | 20.6 | 108.4 | 22.4 | 252 | 39.0  | 11755 | 1.22 | 164 | 162 | 150 | 3795  | Granitoid(<65%)    |
| 17DC03-1-06  | 3.52 | 0.015 | 20.7 | 0.38 | 5.45  | 8.78  | 0.33 | 28.6 | 8.3  | 101.8 | 34.6 | 166.1 | 31.5 | 332 | 53.2  | 11031 | 1.03 | 377 | 279 | 158 | 6514  | Granitoid(<65%)    |
| 17DC03-1-07  | 2.08 | 0.061 | 10.0 | 0.08 | 1.71  | 5.86  | 0.44 | 35.5 | 10.4 | 121.3 | 39.7 | 181.5 | 33.0 | 333 | 50.6  | 11936 | 1.41 | 331 | 213 | 237 | 4990  | Granitoid(<65%)    |
| 17DC03-1-08  | 1.87 | 0.000 | 27.8 | 0.10 | 0.89  | 2.21  | 0.51 | 11.3 | 4.0  | 57.8  | 20.4 | 110.8 | 22.9 | 262 | 43.4  | 10156 | 0.77 | 87  | 88  | 49  | 2047  | Granitoid(<65%)    |
| 17DC03-1-09  | 1.89 | 0.000 | 22.7 | 0.10 | 1.50  | 3.02  | 0.62 | 15.7 | 4.3  | 51.4  | 18.6 | 94.2  | 19.0 | 222 | 38.0  | 9479  | 0.64 | 231 | 167 | 139 | 3909  | Dolerite           |
| 17DC03-1-10  | 2.19 | 0.007 | 66.0 | 0.06 | 1.54  | 3.48  | 0.69 | 18.0 | 6.5  | 83.6  | 33.4 | 174.7 | 36.5 | 410 | 68.3  | 10427 | 1.86 | 254 | 263 | 170 | 6145  | Granitoid(<65%)    |
| 17DC03-1-11  | 0.32 | 0.000 | 7.1  | 0.04 | 0.58  | 1.13  | 0.40 | 5.8  | 1.8  | 29.9  | 13.8 | 93.9  | 23.1 | 344 | 74.7  | 8892  | 0.27 | 102 | 63  | 96  | 1463  | Dolerite           |
| 17DC03-1-12  | 1.32 | 0.038 | 4.8  | 0.00 | 1.52  | 3.23  | 0.61 | 19.3 | 6.7  | 90.5  | 32.1 | 162.1 | 30.5 | 344 | 54.0  | 9456  | 0.89 | 108 | 68  | 87  | 1600  | Dolerite           |
| 17DC03-1-13  | 2.59 | 0.025 | 28.9 | 0.08 | 0.83  | 2.63  | 0.68 | 20.3 | 6.9  | 93.0  | 35.5 | 186.5 | 36.3 | 418 | 67.8  | 10742 | 1.18 | 175 | 122 | 117 | 2850  | Granitoid(<65%)    |
| 17DC03-1-14  | 2.30 | 0.073 | 9.6  | 0.07 | 1.37  | 2.66  | 0.34 | 12.4 | 4.1  | 52.0  | 18.2 | 86.0  | 16.9 | 184 | 30.5  | 9785  | 0.93 | 141 | 95  | 80  | 2213  | Dolerite           |
| 17DC03-1-15  | 2.46 | 0.019 | 12.1 | 0.11 | 3.66  | 8.14  | 0.70 | 41.9 | 14.0 | 175.7 | 60.6 | 290.5 | 55.2 | 581 | 90.6  | 10265 | 0.93 | 261 | 258 | 215 | 6036  | Granitoid(<70-75%) |
| 17DC03-1-16  | 2.43 | 0.041 | 11.8 | 0.03 | 0.98  | 2.04  | 0.23 | 15.1 | 5.7  | 78.7  | 29.6 | 155.1 | 30.8 | 336 | 55.3  | 11107 | 1.62 | 397 | 206 | 345 | 4806  | Granitoid(<65%)    |
| 17DC03-1-17  | 3.42 | 0.000 | 26.7 | 0.22 | 4.19  | 7.00  | 0.56 | 39.3 | 13.0 | 162.3 | 55.3 | 264.2 | 50.3 | 555 | 85.1  | 10083 | 1.72 | 218 | 213 | 149 | 4991  | Dolerite           |
| 17DC03-1-18  | 1.22 | 0.073 | 15.3 | 0.11 | 2.46  | 4.24  | 0.86 | 20.8 | 6.2  | 80.5  | 29.2 | 140.3 | 27.4 | 314 | 50.8  | 9303  | 0.48 | 197 | 158 | 93  | 3704  | Dolerite           |
| 17DC03-1-19  | 1.41 | 0.000 | 19.5 | 0.01 | 1.00  | 4.31  | 0.80 | 26.9 | 9.7  | 135.6 | 51.8 | 255.1 | 49.5 | 562 | 88.6  | 11095 | 0.96 | 241 | 174 | 169 | 4077  | Granitoid(<70-75%) |
| 17DC03-1-20  | 3.00 | 0.000 | 11.6 | 0.03 | 0.77  | 2.02  | 0.16 | 9.8  | 3.2  | 47.1  | 16.4 | 85.1  | 17.6 | 205 | 33.7  | 10571 | 1.11 | 106 | 94  | 112 | 2207  | Granitoid(<65%)    |
| 17DC03-1-22  | 2.33 | 9.050 | 32.3 | 2.82 | 15.58 | 6.09  | 0.52 | 25.3 | 7.6  | 96.8  | 35.7 | 183.0 | 38.1 | 427 | 70.4  | 10273 | 0.84 | 148 | 109 | 127 | 2554  | Granitoid(<65%)    |
| 17DC03-1-24  | 1.62 | 0.016 | 9.1  | 0.02 | 0.61  | 2.02  | 0.10 | 10.2 | 3.6  | 52.2  | 19.3 | 97.5  | 19.8 | 223 | 36.2  | 11003 | 1.08 | 228 | 118 | 202 | 2767  | Granitoid(<65%)    |
| 17DC03-1-25  | 1.18 | 0.042 | 34.1 | 0.16 | 3.36  | 5.31  | 2.15 | 22.3 | 6.3  | 76.0  | 26.2 | 128.6 | 24.9 | 293 | 47.6  | 9583  | 0.74 | 748 | 600 | 452 | 14033 | Dolerite           |
| 17DC03-1-26  | 7.10 | 0.000 | 20.6 | 0.00 | 0.62  | 2.05  | 0.13 | 17.7 | 7.0  | 107.9 | 41.8 | 229.9 | 47.6 | 551 | 91.6  | 11657 | 3.11 | 456 | 292 | 362 | 6832  | Granitoid(<70-75%) |
| 17DC03-1-27  | 3.38 | 0.000 | 35.2 | 0.08 | 1.51  | 4.05  | 1.26 | 27.0 | 9.2  | 118.9 | 44.7 | 230.8 | 44.1 | 496 | 79.6  | 10329 | 1.53 | 268 | 165 | 173 | 3855  | Granitoid(<65%)    |
| 17DC03-1-28  | 2.04 | 0.111 | 13.8 | 0.62 | 7.94  | 10.50 | 1.03 | 41.1 | 11.7 | 127.6 | 41.5 | 179.9 | 32.5 | 330 | 49.0  | 9040  | 0.62 | 266 | 269 | 165 | 6298  | Dolerite           |
| 17DC03-1-29  | 2.12 | 0.049 | 8.2  | 0.06 | 0.81  | 2.81  | 0.25 | 15.2 | 7.3  | 107.0 | 40.4 | 221.0 | 45.3 | 507 | 87.7  | 11966 | 1.78 | 338 | 164 | 361 | 3834  | Granitoid(<70-75%) |
| 17DC03-1-30  | 2.92 | 0.015 | 13.9 | 0.01 | 0.71  | 1.84  | 0.13 | 10.4 | 4.0  | 60.9  | 24.6 | 137.7 | 31.3 | 362 | 65.1  | 12572 | 2.54 | 886 | 436 | 856 | 10201 | Granitoid(<65%)    |
| 17DC03-1-31  | 1.29 | 0.000 | 12.9 | 0.06 | 0.95  | 2.73  | 0.24 | 15.2 | 5.1  | 64.2  | 24.7 | 118.4 | 23.4 | 261 | 42.3  | 10060 | 1.33 | 325 | 180 | 248 | 4204  | Dolerite           |
| 17DC03-1-33  | 1.55 | 0.000 | 21.5 | 0.12 | 1.77  | 3.57  | 0.29 | 15.9 | 6.0  | 87.7  | 32.5 | 171.1 | 34.9 | 392 | 66.9  | 10711 | 1.46 | 239 | 236 | 179 | 5518  | Granitoid(<65%)    |
| 17DC03-1-34  | 1.82 | 0.054 | 33.5 | 0.27 | 5.23  | 7.86  | 1.69 | 35.3 | 11.7 | 132.6 | 46.9 | 223.9 | 46.0 | 519 | 87.1  | 8594  | 0.61 | 323 | 239 | 134 | 5591  | Dolerite           |
| 17DC03-1-35  | 0.56 | 0.015 | 8.8  | 0.05 | 0.79  | 1.69  | 0.10 | 8.3  | 3.4  | 45.0  | 17.0 | 85.3  | 17.7 | 200 | 33.6  | 10695 | 0.82 | 189 | 106 | 161 | 2488  | Granitoid(<65%)    |
| 17DC03-1-36  | 4.03 | 0.000 | 38.1 | 0.06 | 1.94  | 3.33  | 0.57 | 20.2 | 7.5  | 105.5 | 41.0 | 211.5 | 44.0 | 504 | 83.7  | 10031 | 1.72 | 303 | 201 | 181 | 4704  | Dolerite           |
| 17DC03-1-37  | 1.33 | 0.097 | 15.2 | 0.04 | 1.66  | 3.07  | 0.56 | 15.2 | 5.1  | 61.4  | 21.4 | 104.8 | 19.6 | 219 | 34.7  | 9271  | 0.92 | 187 | 143 | 125 | 3337  | Dolerite           |

|             |      |       |      |      |       |      |      |      |      |       |      |       |      |     |       |       |      |     |     |     |       |                    |
|-------------|------|-------|------|------|-------|------|------|------|------|-------|------|-------|------|-----|-------|-------|------|-----|-----|-----|-------|--------------------|
| 17DC03-1-38 | 4.79 | 0.000 | 26.8 | 0.08 | 1.26  | 3.70 | 0.37 | 22.6 | 8.3  | 110.5 | 43.5 | 226.6 | 47.3 | 529 | 93.1  | 9618  | 1.28 | 224 | 154 | 207 | 3602  | Dolerite           |
| 17DC03-1-39 | 1.59 | 0.017 | 23.7 | 0.08 | 1.17  | 2.44 | 0.35 | 13.4 | 4.1  | 50.5  | 18.7 | 90.0  | 18.7 | 205 | 33.5  | 10336 | 0.92 | 165 | 165 | 111 | 3863  | Granitoid(<65%)    |
| 17DC03-1-41 | 3.09 | 0.000 | 26.4 | 0.03 | 0.64  | 1.99 | 0.33 | 15.2 | 5.5  | 82.5  | 33.4 | 177.0 | 39.5 | 477 | 80.8  | 11637 | 2.07 | 272 | 175 | 197 | 4101  | Granitoid(<65%)    |
| 17DC03-1-42 | 3.39 | 0.024 | 13.6 | 0.05 | 1.20  | 2.31 | 0.42 | 16.4 | 6.3  | 82.5  | 30.7 | 153.8 | 31.1 | 346 | 56.8  | 9998  | 0.91 | 127 | 88  | 92  | 2055  | Dolerite           |
| 17DC03-1-43 | 0.84 | 0.046 | 10.7 | 0.01 | 0.22  | 0.65 | 0.31 | 2.7  | 1.2  | 17.9  | 8.2  | 46.6  | 11.7 | 155 | 29.2  | 12516 | 1.29 | 145 | 66  | 207 | 1554  | Granitoid(<65%)    |
| 17DC03-1-44 | 3.12 | 0.000 | 54.5 | 0.10 | 1.51  | 3.15 | 0.70 | 18.7 | 5.6  | 70.6  | 26.7 | 130.6 | 27.5 | 314 | 50.7  | 10220 | 1.91 | 179 | 177 | 138 | 4134  | Granitoid(<65%)    |
| 17DC03-1-45 | 4.14 | 0.000 | 43.2 | 0.15 | 2.82  | 7.50 | 2.40 | 41.0 | 14.3 | 182.3 | 69.3 | 346.7 | 68.5 | 756 | 127.0 | 10140 | 1.22 | 384 | 303 | 202 | 7074  | Dolerite           |
| 17DC03-1-47 | 6.08 | 6.423 | 50.6 | 3.07 | 16.86 | 7.13 | 0.61 | 21.4 | 7.0  | 90.9  | 34.0 | 177.2 | 37.5 | 428 | 71.2  | 10644 | 2.10 | 358 | 268 | 206 | 6259  | Granitoid(<65%)    |
| 17DC03-1-48 | 0.63 | 0.000 | 2.1  | 0.13 | 3.51  | 6.07 | 0.27 | 35.0 | 11.0 | 130.8 | 44.3 | 205.7 | 39.8 | 435 | 67.4  | 9719  | 0.55 | 315 | 149 | 295 | 3491  | Dolerite           |
| 17DC03-1-49 | 1.54 | 0.000 | 7.2  | 0.01 | 0.60  | 1.74 | 0.07 | 12.9 | 4.3  | 57.2  | 21.4 | 108.0 | 22.0 | 234 | 37.6  | 10551 | 0.92 | 211 | 107 | 205 | 2495  | Granitoid(<65%)    |
| 17DC03-1-50 | 4.61 | 0.000 | 17.4 | 0.08 | 1.34  | 3.42 | 0.27 | 23.4 | 8.3  | 113.4 | 42.6 | 211.3 | 42.9 | 477 | 75.1  | 10676 | 1.65 | 190 | 127 | 150 | 2980  | Granitoid(<65%)    |
| 17DC03-1-51 | 1.92 | 0.014 | 29.5 | 0.06 | 1.49  | 2.72 | 0.33 | 16.0 | 5.0  | 67.2  | 24.8 | 123.6 | 23.8 | 253 | 42.1  | 12230 | 1.38 | 419 | 243 | 318 | 5681  | Granitoid(<65%)    |
| 17DC03-1-52 | 2.05 | 0.000 | 8.9  | 0.14 | 3.19  | 5.59 | 1.32 | 28.0 | 8.1  | 95.6  | 33.6 | 156.4 | 30.9 | 335 | 53.4  | 8963  | 0.86 | 344 | 195 | 272 | 4548  | Dolerite           |
| 17DC03-1-53 | 0.91 | 0.013 | 16.4 | 0.11 | 0.99  | 3.13 | 0.53 | 14.9 | 4.2  | 58.2  | 23.0 | 122.4 | 25.4 | 303 | 52.8  | 8635  | 0.61 | 222 | 151 | 114 | 3539  | Dolerite           |
| 17DC03-1-54 | 2.91 | 0.000 | 28.5 | 0.04 | 0.91  | 2.50 | 0.40 | 16.3 | 6.5  | 89.9  | 36.5 | 184.1 | 38.3 | 444 | 72.8  | 11344 | 1.48 | 347 | 234 | 236 | 5471  | Granitoid(<65%)    |
| 17DC03-1-55 | 2.08 | 0.046 | 34.3 | 0.04 | 1.28  | 2.44 | 0.73 | 16.3 | 6.2  | 82.5  | 32.3 | 165.8 | 37.6 | 445 | 75.0  | 11867 | 1.18 | 332 | 240 | 199 | 5604  | Granitoid(<65%)    |
| 17DC03-1-56 | 1.56 | 0.039 | 4.6  | 0.05 | 0.96  | 2.96 | 0.08 | 22.9 | 8.3  | 122.5 | 46.8 | 228.7 | 46.3 | 512 | 80.2  | 11932 | 1.42 | 335 | 157 | 406 | 3664  | Granitoid(<70-75%) |
| 17DC03-1-57 | 3.36 | 0.000 | 50.8 | 0.09 | 1.35  | 3.76 | 0.65 | 26.6 | 9.1  | 122.6 | 47.3 | 238.2 | 48.2 | 553 | 89.8  | 10884 | 1.90 | 297 | 222 | 152 | 5191  | Granitoid(<70-75%) |
| 17DC03-1-58 | 2.32 | 0.000 | 8.0  | 0.04 | 0.95  | 1.83 | 0.24 | 14.7 | 5.0  | 68.9  | 26.4 | 130.5 | 27.2 | 295 | 45.6  | 10433 | 1.31 | 248 | 148 | 215 | 3454  | Granitoid(<65%)    |
| 17DC03-1-59 | 2.20 | 3.116 | 13.5 | 0.48 | 2.46  | 2.61 | 0.50 | 13.6 | 5.2  | 67.7  | 23.5 | 117.4 | 22.9 | 255 | 40.5  | 10209 | 0.93 | 234 | 126 | 198 | 2935  | Granitoid(<65%)    |
| 17DC03-1-60 | 1.91 | 0.027 | 27.0 | 0.07 | 1.06  | 2.78 | 0.18 | 13.2 | 4.9  | 61.9  | 23.0 | 116.9 | 23.5 | 272 | 42.6  | 11713 | 1.33 | 428 | 250 | 280 | 5847  | Granitoid(<65%)    |
| 17DC03-1-61 | 4.84 | 0.110 | 93.7 | 0.11 | 2.57  | 5.68 | 2.26 | 35.5 | 11.7 | 150.9 | 55.1 | 280.8 | 58.2 | 664 | 107.0 | 9339  | 1.63 | 614 | 457 | 378 | 10688 | Dolerite           |
| 17DC03-1-62 | 4.18 | 0.047 | 27.7 | 0.15 | 2.50  | 5.53 | 0.61 | 28.0 | 10.5 | 134.6 | 48.4 | 244.3 | 50.0 | 570 | 89.1  | 10563 | 1.72 | 339 | 343 | 230 | 8027  | Granitoid(<70-75%) |
| 17DC03-1-63 | 0.87 | 0.049 | 16.7 | 0.05 | 0.67  | 1.11 | 0.19 | 6.7  | 2.5  | 27.9  | 10.6 | 54.7  | 11.6 | 134 | 22.8  | 9620  | 0.65 | 349 | 185 | 216 | 4319  | Dolerite           |
| 17DC03-1-64 | 4.06 | 0.001 | 9.6  | 0.14 | 2.81  | 4.95 | 0.10 | 30.1 | 9.3  | 122.3 | 44.3 | 211.3 | 41.0 | 450 | 69.9  | 10232 | 1.38 | 151 | 123 | 170 | 2886  | Granitoid(<65%)    |
| 17DC03-1-65 | 1.05 | 0.053 | 4.7  | 0.06 | 1.10  | 3.53 | 0.16 | 22.6 | 7.8  | 111.0 | 42.9 | 213.6 | 42.2 | 475 | 75.9  | 11075 | 0.57 | 177 | 100 | 163 | 2332  | Granitoid(<65%)    |
| 17DC03-1-66 | 2.62 | 0.014 | 13.1 | 0.08 | 1.23  | 2.67 | 0.28 | 16.8 | 6.5  | 83.8  | 31.4 | 153.6 | 30.7 | 347 | 53.7  | 10197 | 1.14 | 106 | 97  | 97  | 2257  | Granitoid(<65%)    |
| 17DC03-1-67 | 3.60 | 0.040 | 23.0 | 0.05 | 1.09  | 2.83 | 0.26 | 18.7 | 7.4  | 98.3  | 36.1 | 190.8 | 38.3 | 427 | 70.1  | 10499 | 2.17 | 384 | 255 | 291 | 5954  | Granitoid(<65%)    |
| 17DC03-1-68 | 2.17 | 0.000 | 15.8 | 0.14 | 1.81  | 4.03 | 0.93 | 24.2 | 8.5  | 112.4 | 43.2 | 220.7 | 44.8 | 500 | 82.5  | 9509  | 0.76 | 197 | 127 | 103 | 2960  | Dolerite           |
| 17DC03-1-69 | 0.66 | 0.000 | 7.8  | 0.04 | 0.62  | 2.19 | 0.14 | 12.2 | 4.2  | 57.7  | 21.7 | 108.7 | 22.4 | 250 | 39.2  | 11396 | 0.75 | 268 | 165 | 186 | 3857  | Granitoid(<65%)    |
| 17DC03-1-70 | 4.42 | 0.065 | 58.4 | 0.07 | 1.11  | 2.55 | 0.91 | 17.3 | 6.8  | 93.1  | 38.2 | 205.4 | 45.0 | 548 | 96.1  | 10185 | 1.96 | 880 | 737 | 405 | 17241 | Granitoid(<70-75%) |
| 17DC03-1-71 | 2.30 | 0.000 | 9.6  | 0.02 | 0.62  | 1.85 | 0.05 | 11.0 | 4.0  | 59.6  | 23.0 | 126.7 | 26.0 | 302 | 49.6  | 10426 | 0.92 | 155 | 93  | 161 | 2186  | Granitoid(<65%)    |
| 17DC03-1-73 | 2.81 | 0.201 | 34.3 | 0.08 | 1.45  | 2.29 | 0.50 | 14.6 | 5.5  | 77.3  | 29.9 | 155.8 | 32.6 | 378 | 62.5  | 9450  | 1.27 | 262 | 174 | 148 | 4061  | Dolerite           |
| 17DC03-1-74 | 2.01 | 0.049 | 18.4 | 0.15 | 2.04  | 4.40 | 0.95 | 24.6 | 8.8  | 120.3 | 47.0 | 249.8 | 51.2 | 582 | 96.6  | 8395  | 0.97 | 274 | 188 | 213 | 4400  | Dolerite           |
| 17DC03-1-75 | 1.54 | 0.028 | 12.4 | 0.07 | 0.53  | 2.10 | 0.43 | 14.6 | 5.0  | 76.8  | 29.6 | 157.3 | 32.1 | 376 | 62.2  | 9998  | 0.83 | 112 | 72  | 103 | 1686  | Dolerite           |
| 17DC03-1-76 | 0.12 | 0.000 | 12.2 | 0.38 | 5.56  | 8.57 | 1.26 | 33.5 | 10.1 | 118.3 | 39.3 | 183.3 | 36.4 | 394 | 61.3  | 10883 | 0.32 | 214 | 169 | 134 | 3959  | Granitoid(<65%)    |
| 17DC03-1-77 | 0.70 | 0.047 | 13.1 | 0.04 | 1.41  | 2.83 | 0.48 | 18.0 | 5.6  | 79.5  | 28.2 | 140.3 | 29.3 | 331 | 53.2  | 9945  | 0.68 | 165 | 112 | 100 | 2625  | Dolerite           |
| 17DC03-1-78 | 2.39 | 0.000 | 17.4 | 0.10 | 1.53  | 3.45 | 0.58 | 21.0 | 7.1  | 98.6  | 37.6 | 189.2 | 37.5 | 417 | 67.9  | 9880  | 0.88 | 194 | 133 | 95  | 3103  | Dolerite           |
| 17DC03-1-79 | 0.38 | 0.043 | 1.9  | 0.04 | 0.67  | 2.64 | 0.15 | 17.7 | 9.1  | 127.8 | 46.2 | 226.2 | 42.6 | 439 | 69.6  | 11117 | 0.74 | 201 | 81  | 258 | 1889  | Granitoid(<65%)    |
| 17DC03-1-80 | 3.30 | 0.000 | 17.5 | 0.04 | 0.68  | 2.16 | 0.20 | 14.1 | 5.0  | 70.3  | 26.8 | 137.6 | 27.0 | 307 | 50.2  | 11044 | 2.25 | 348 | 216 | 233 | 5039  | Granitoid(<65%)    |
| 17DC03-1-81 | 1.18 | 0.000 | 8.2  | 0.07 | 1.42  | 4.74 | 0.37 | 30.8 | 10.0 | 142.8 | 52.4 | 254.3 | 49.1 | 534 | 82.0  | 11065 | 0.72 | 297 | 177 | 205 | 4140  | Granitoid(<70-75%) |
| 17DC03-1-82 | 0.90 | 0.137 | 4.2  | 0.05 | 1.80  | 4.35 | 0.40 | 30.6 | 12.5 | 176.0 | 70.2 | 357.7 | 73.3 | 826 | 133.4 | 11876 | 0.67 | 114 | 68  | 96  | 1592  | Granitoid(<70-75%) |

|              |      |       |      |      |       |       |      |      |      |       |      |       |      |     |       |       |      |     |     |     |      |                    |
|--------------|------|-------|------|------|-------|-------|------|------|------|-------|------|-------|------|-----|-------|-------|------|-----|-----|-----|------|--------------------|
| 17DC03-1-84  | 1.06 | 0.021 | 4.1  | 0.08 | 3.50  | 7.96  | 0.33 | 45.7 | 16.3 | 204.3 | 71.3 | 335.5 | 62.3 | 658 | 101.5 | 11834 | 0.61 | 299 | 174 | 246 | 4069 | Granitoid(<70-75%) |
| 17DC03-1-85  | 6.95 | 0.000 | 25.6 | 0.08 | 1.37  | 3.67  | 0.31 | 19.0 | 6.5  | 85.2  | 30.8 | 150.6 | 28.9 | 334 | 53.4  | 10850 | 2.11 | 237 | 100 | 232 | 2330 | Granitoid(<65%)    |
| 17DC03-1-86  | 1.54 | 0.033 | 33.2 | 0.24 | 4.30  | 8.54  | 1.95 | 39.1 | 12.1 | 150.1 | 51.5 | 250.2 | 47.7 | 529 | 84.7  | 10512 | 0.51 | 363 | 309 | 153 | 7224 | Granitoid(<70-75%) |
| 17DC03-1-87  | 2.41 | 0.000 | 17.4 | 0.10 | 1.44  | 2.67  | 0.34 | 14.8 | 4.4  | 58.0  | 21.0 | 100.7 | 19.4 | 220 | 35.3  | 11175 | 1.16 | 208 | 127 | 147 | 2963 | Granitoid(<65%)    |
| 17DC03-1-88  | 0.00 | 0.019 | 11.6 | 0.12 | 1.66  | 3.30  | 0.28 | 14.3 | 5.5  | 68.7  | 23.9 | 119.2 | 23.2 | 253 | 41.7  | 9976  | 1.01 | 124 | 80  | 80  | 1873 | Dolerite           |
| 17DC03-1-89  | 1.91 | 0.266 | 17.0 | 0.05 | 0.85  | 2.50  | 0.29 | 11.3 | 4.3  | 58.9  | 23.4 | 122.0 | 25.2 | 295 | 50.2  | 10448 | 0.89 | 133 | 93  | 83  | 2174 | Granitoid(<65%)    |
| 17DC03-1-90  | 0.93 | 0.021 | 13.6 | 0.11 | 1.24  | 4.16  | 0.82 | 25.9 | 9.3  | 131.8 | 48.7 | 251.3 | 51.9 | 589 | 96.9  | 11853 | 1.12 | 224 | 121 | 178 | 2840 | Granitoid(<70-75%) |
| 17DC03-1-91  | 1.58 | 0.000 | 12.6 | 0.03 | 0.54  | 1.26  | 0.28 | 10.7 | 3.9  | 51.0  | 19.8 | 105.6 | 23.2 | 266 | 45.3  | 10503 | 0.84 | 116 | 76  | 94  | 1787 | Granitoid(<65%)    |
| 17DC03-1-92  | 0.52 | 0.000 | 5.2  | 0.05 | 1.52  | 4.26  | 0.36 | 24.9 | 8.9  | 119.9 | 44.0 | 220.3 | 42.5 | 468 | 71.7  | 11260 | 0.68 | 164 | 105 | 97  | 2443 | Granitoid(<65%)    |
| 17DC03-1-93  | 3.50 | 0.024 | 15.3 | 0.07 | 1.18  | 3.00  | 0.31 | 15.6 | 6.1  | 81.7  | 31.1 | 161.3 | 33.7 | 405 | 71.0  | 12305 | 1.92 | 336 | 216 | 349 | 5047 | Granitoid(<65%)    |
| 17DC03-1-94  | 1.44 | 0.095 | 18.7 | 0.06 | 1.25  | 3.13  | 0.37 | 15.6 | 5.4  | 78.3  | 29.6 | 152.2 | 31.3 | 343 | 55.9  | 11152 | 1.35 | 284 | 203 | 284 | 4739 | Granitoid(<65%)    |
| 17DC03-1-95  | 0.83 | 0.001 | 4.2  | 0.05 | 0.90  | 2.91  | 0.24 | 21.5 | 8.1  | 115.5 | 46.1 | 233.2 | 47.6 | 545 | 87.4  | 11775 | 0.92 | 237 | 115 | 247 | 2699 | Granitoid(<70-75%) |
| 17DC03-1-96  | 2.76 | 0.021 | 23.1 | 0.07 | 1.36  | 2.96  | 0.53 | 21.4 | 6.7  | 95.8  | 34.6 | 177.3 | 34.9 | 402 | 64.3  | 10596 | 1.54 | 256 | 178 | 196 | 4160 | Granitoid(<65%)    |
| 17DC03-1-97  | 2.36 | 0.000 | 20.6 | 0.03 | 1.02  | 2.94  | 0.63 | 19.2 | 7.2  | 104.1 | 42.2 | 213.9 | 43.8 | 497 | 80.6  | 11253 | 1.42 | 232 | 156 | 192 | 3646 | Granitoid(<65%)    |
| 17DC03-1-98  | 1.54 | 0.060 | 11.7 | 0.04 | 0.73  | 2.74  | 0.51 | 17.3 | 5.9  | 80.7  | 29.3 | 149.7 | 30.0 | 349 | 58.4  | 10270 | 0.55 | 144 | 114 | 100 | 2663 | Granitoid(<65%)    |
| 17DC03-1-99  | 0.93 | 0.023 | 9.1  | 0.00 | 0.74  | 1.87  | 0.23 | 12.3 | 5.0  | 68.5  | 25.3 | 129.3 | 25.5 | 280 | 46.1  | 10868 | 1.05 | 235 | 130 | 192 | 3049 | Granitoid(<65%)    |
| 17DC03-1-100 | 2.17 | 0.098 | 38.7 | 0.15 | 3.30  | 6.63  | 1.32 | 30.7 | 10.5 | 127.8 | 46.1 | 229.0 | 44.7 | 497 | 86.9  | 8887  | 0.89 | 162 | 131 | 81  | 3061 | Dolerite           |
| FC57-1-01    | 1.96 | 0.015 | 28.3 | 0.06 | 1.45  | 3.81  | 1.06 | 21.9 | 7.9  | 105.1 | 39.2 | 200.2 | 42.1 | 501 | 71.5  | 9729  | 0.99 | 133 | 104 | 91  | 2399 | Dolerite           |
| FC57-1-02    | 4.94 | 0.003 | 11.2 | 0.04 | 1.03  | 2.67  | 0.17 | 14.5 | 5.1  | 68.7  | 24.7 | 118.2 | 24.3 | 278 | 38.3  | 9540  | 1.86 | 83  | 76  | 99  | 1758 | Dolerite           |
| FC57-1-03    | 3.83 | 0.032 | 39.1 | 0.24 | 4.40  | 8.38  | 0.87 | 37.8 | 12.1 | 148.8 | 52.5 | 246.2 | 50.2 | 584 | 79.6  | 9778  | 1.37 | 135 | 144 | 93  | 3321 | Dolerite           |
| FC57-1-06    | 0.19 | 0.016 | 4.4  | 0.02 | 0.39  | 0.63  | 0.32 | 2.2  | 0.8  | 9.5   | 3.5  | 18.9  | 4.8  | 67  | 12.1  | 7594  | 0.15 | 424 | 144 | 259 | 3326 | carbonate          |
| FC57-1-07    | 1.87 | 0.162 | 7.1  | 0.93 | 13.48 | 20.95 | 1.31 | 91.4 | 25.4 | 278.7 | 87.3 | 376.5 | 70.0 | 754 | 106.3 | 6106  | 1.11 | 125 | 121 | 101 | 2779 | basalt             |
| FC57-1-08    | 6.84 | 0.002 | 13.7 | 0.07 | 2.01  | 4.62  | 0.18 | 27.1 | 10.0 | 131.6 | 45.9 | 224.9 | 44.5 | 489 | 66.2  | 8715  | 2.68 | 107 | 105 | 137 | 2416 | Dolerite           |
| FC57-1-09    | 1.81 | 0.001 | 24.3 | 0.06 | 0.94  | 1.95  | 0.57 | 9.1  | 2.9  | 35.7  | 12.1 | 61.9  | 13.3 | 161 | 22.8  | 9945  | 1.01 | 285 | 108 | 141 | 2494 | Dolerite           |
| FC57-1-100   | 1.78 | 0.014 | 41.9 | 0.25 | 4.25  | 7.56  | 2.04 | 34.3 | 10.9 | 138.1 | 48.3 | 237.8 | 48.7 | 593 | 82.4  | 8385  | 0.68 | 197 | 151 | 122 | 3471 | Dolerite           |
| FC57-1-11    | 0.67 | 0.035 | 38.6 | 0.11 | 1.53  | 2.77  | 0.85 | 11.8 | 3.5  | 41.6  | 13.7 | 69.7  | 15.2 | 178 | 24.4  | 5654  | 0.26 | 146 | 137 | 150 | 3156 | basalt             |
| FC57-1-12    | 2.13 | 0.076 | 15.3 | 0.17 | 2.13  | 3.17  | 0.46 | 17.3 | 5.7  | 75.1  | 27.1 | 135.9 | 28.2 | 330 | 47.5  | 9776  | 1.00 | 78  | 81  | 62  | 1858 | Dolerite           |
| FC57-1-13    | 0.74 | 0.000 | 10.2 | 0.11 | 2.31  | 4.63  | 1.41 | 20.0 | 6.3  | 78.8  | 27.4 | 132.7 | 27.3 | 319 | 47.3  | 8020  | 0.55 | 107 | 69  | 57  | 1595 | Dolerite           |
| FC57-1-14    | 0.57 | 0.019 | 11.8 | 0.19 | 4.17  | 7.76  | 1.38 | 33.2 | 10.7 | 132.9 | 47.4 | 230.0 | 46.0 | 531 | 76.1  | 9087  | 0.26 | 75  | 65  | 54  | 1494 | Dolerite           |
| FC57-1-15    | 3.55 | 0.709 | 14.4 | 0.32 | 2.74  | 4.22  | 0.39 | 21.7 | 7.5  | 100.6 | 34.9 | 171.2 | 34.5 | 391 | 55.1  | 10033 | 1.63 | 182 | 102 | 283 | 2363 | Dolerite           |
| FC57-1-16    | 1.33 | 0.000 | 7.2  | 0.06 | 1.15  | 4.01  | 0.56 | 26.6 | 10.5 | 148.8 | 56.3 | 282.5 | 59.1 | 694 | 99.8  | 10928 | 0.71 | 143 | 76  | 145 | 1755 | Granitoid(<70-75%) |
| FC57-1-17    | 0.90 | 0.009 | 15.6 | 0.27 | 4.57  | 7.55  | 1.43 | 29.4 | 8.9  | 101.7 | 33.5 | 159.1 | 31.4 | 374 | 50.9  | 9522  | 0.60 | 269 | 253 | 219 | 5827 | Dolerite           |
| FC57-1-18    | 2.35 | 0.025 | 5.4  | 0.26 | 5.05  | 10.06 | 0.75 | 42.5 | 13.6 | 162.9 | 52.0 | 235.0 | 43.2 | 460 | 60.7  | 8536  | 1.25 | 115 | 93  | 100 | 2144 | Dolerite           |
| FC57-1-19    | 1.74 | 0.012 | 8.2  | 0.07 | 1.21  | 3.07  | 0.14 | 15.2 | 5.5  | 71.6  | 24.8 | 121.6 | 24.2 | 267 | 35.8  | 11321 | 0.82 | 182 | 117 | 111 | 2691 | Granitoid(<65%)    |
| FC57-1-20    | 0.30 | 0.003 | 9.5  | 0.15 | 3.02  | 5.66  | 1.31 | 22.1 | 6.8  | 82.5  | 28.6 | 139.2 | 28.4 | 336 | 48.5  | 9245  | 0.12 | 85  | 78  | 78  | 1799 | Dolerite           |
| FC57-1-21    | 2.67 | 0.042 | 14.8 | 0.08 | 1.70  | 4.08  | 0.53 | 23.7 | 8.3  | 110.6 | 39.8 | 206.8 | 42.2 | 492 | 71.5  | 9153  | 1.29 | 256 | 171 | 310 | 3931 | Dolerite           |
| FC57-1-24    | 1.51 | 0.000 | 3.7  | 0.04 | 0.89  | 1.72  | 0.09 | 10.2 | 3.7  | 47.8  | 17.1 | 85.3  | 16.7 | 186 | 25.7  | 10010 | 0.78 | 79  | 41  | 49  | 939  | Dolerite           |
| FC57-1-25    | 1.80 | 0.044 | 29.0 | 0.08 | 1.43  | 3.12  | 0.79 | 16.8 | 5.9  | 78.9  | 29.0 | 151.7 | 31.9 | 379 | 57.1  | 9250  | 0.84 | 173 | 123 | 89  | 2829 | Dolerite           |
| FC57-1-26    | 1.01 | 0.009 | 13.2 | 0.08 | 1.36  | 2.54  | 0.38 | 10.9 | 2.8  | 31.3  | 9.3  | 42.2  | 8.1  | 85  | 12.2  | 8884  | 0.45 | 137 | 77  | 80  | 1784 | carbonate          |
| FC57-1-27    | 2.06 | 0.042 | 5.0  | 0.05 | 0.90  | 2.58  | 0.12 | 16.3 | 6.3  | 91.8  | 34.5 | 183.6 | 37.9 | 450 | 64.5  | 11638 | 1.76 | 235 | 116 | 237 | 2682 | Granitoid(<65%)    |
| FC57-1-28    | 0.73 | 0.052 | 14.2 | 0.44 | 5.96  | 8.65  | 2.10 | 28.6 | 8.2  | 88.2  | 27.9 | 130.4 | 25.7 | 301 | 42.3  | 7871  | 0.40 | 119 | 58  | 134 | 1327 | basalt             |
| FC57-1-29    | 3.58 | 0.013 | 45.4 | 0.09 | 1.43  | 3.62  | 0.53 | 21.7 | 7.7  | 101.4 | 36.9 | 189.6 | 39.2 | 463 | 67.5  | 9397  | 1.57 | 251 | 178 | 122 | 4107 | Dolerite           |

|           |       |       |      |      |       |       |      |       |      |       |       |       |       |      |       |       |      |     |     |     |       |                    |
|-----------|-------|-------|------|------|-------|-------|------|-------|------|-------|-------|-------|-------|------|-------|-------|------|-----|-----|-----|-------|--------------------|
| FC57-1-30 | 3.02  | 0.010 | 24.8 | 0.06 | 1.50  | 3.11  | 0.25 | 17.5  | 6.2  | 80.1  | 29.2  | 152.3 | 31.9  | 362  | 52.8  | 9998  | 1.08 | 257 | 158 | 110 | 3639  | Dolerite           |
| FC57-1-31 | 5.46  | 0.000 | 19.8 | 0.05 | 1.30  | 3.24  | 0.40 | 20.4  | 7.5  | 100.1 | 36.0  | 180.9 | 36.4  | 422  | 60.7  | 9678  | 1.93 | 145 | 75  | 144 | 1735  | Dolerite           |
| FC57-1-32 | 2.70  | 0.211 | 14.1 | 0.26 | 4.32  | 7.73  | 0.46 | 37.1  | 12.4 | 159.5 | 54.8  | 261.0 | 51.2  | 576  | 78.3  | 8875  | 1.23 | 133 | 100 | 97  | 2302  | Dolerite           |
| FC57-1-33 | 1.57  | 0.073 | 30.7 | 0.62 | 10.29 | 15.90 | 6.35 | 50.8  | 11.9 | 111.4 | 29.0  | 111.5 | 19.3  | 190  | 24.3  | 7647  | 0.44 | 236 | 91  | 41  | 2106  | basalt             |
| FC57-1-34 | 2.66  | 0.000 | 5.6  | 0.03 | 0.73  | 1.91  | 0.19 | 13.0  | 4.6  | 64.8  | 23.8  | 119.5 | 25.4  | 294  | 41.9  | 9310  | 1.16 | 71  | 44  | 113 | 1020  | Dolerite           |
| FC57-1-35 | 6.04  | 0.000 | 36.5 | 0.03 | 0.53  | 1.64  | 0.36 | 10.6  | 4.5  | 66.6  | 26.9  | 149.9 | 34.2  | 428  | 69.7  | 11576 | 2.90 | 455 | 270 | 225 | 6217  | Granitoid(<65%)    |
| FC57-1-36 | 1.99  | 0.012 | 4.3  | 0.02 | 0.74  | 2.14  | 0.20 | 14.9  | 5.2  | 72.9  | 26.0  | 129.9 | 25.6  | 291  | 41.5  | 9246  | 1.13 | 67  | 51  | 114 | 1166  | Dolerite           |
| FC57-1-37 | 0.54  | 0.010 | 2.4  | 0.03 | 0.56  | 1.78  | 0.17 | 10.8  | 3.8  | 53.0  | 19.1  | 93.7  | 18.0  | 203  | 28.4  | 9838  | 0.30 | 135 | 70  | 126 | 1606  | Dolerite           |
| FC57-1-38 | 2.86  | 0.024 | 39.9 | 0.06 | 1.32  | 2.64  | 0.68 | 17.1  | 5.9  | 81.7  | 30.3  | 154.5 | 32.4  | 392  | 57.5  | 10522 | 1.25 | 110 | 80  | 55  | 1838  | Granitoid(<65%)    |
| FC57-1-39 | 5.06  | 0.000 | 10.4 | 0.32 | 5.90  | 10.72 | 0.81 | 44.1  | 13.9 | 170.1 | 55.0  | 248.7 | 46.4  | 495  | 66.7  | 7828  | 2.18 | 97  | 81  | 105 | 1858  | basalt             |
| FC57-1-40 | 1.14  | 0.093 | 16.4 | 0.37 | 4.76  | 8.00  | 4.29 | 39.2  | 11.9 | 147.2 | 50.3  | 255.5 | 54.9  | 678  | 104.0 | 6946  | 0.65 | 855 | 672 | 213 | 15502 | basalt             |
| FC57-1-41 | 3.92  | 0.035 | 82.5 | 0.50 | 9.48  | 17.22 | 1.53 | 79.3  | 23.5 | 286.3 | 94.0  | 431.0 | 82.0  | 897  | 127.1 | 8394  | 1.26 | 309 | 252 | 141 | 5807  | Dolerite           |
| FC57-1-42 | 3.48  | 0.004 | 17.4 | 0.05 | 0.84  | 2.60  | 0.12 | 15.6  | 5.7  | 81.5  | 30.8  | 160.1 | 34.3  | 401  | 58.8  | 10570 | 2.14 | 321 | 184 | 213 | 4242  | Granitoid(<65%)    |
| FC57-1-43 | 5.71  | 0.063 | 18.8 | 0.07 | 1.77  | 4.09  | 0.16 | 25.3  | 9.3  | 130.7 | 48.9  | 244.7 | 50.2  | 563  | 79.2  | 9744  | 1.97 | 148 | 105 | 233 | 2430  | Dolerite           |
| FC57-1-44 | 2.26  | 0.025 | 14.5 | 0.18 | 2.78  | 5.31  | 0.50 | 25.7  | 7.8  | 99.6  | 33.1  | 159.0 | 32.0  | 359  | 49.6  | 9025  | 1.19 | 159 | 152 | 144 | 3508  | Dolerite           |
| FC57-1-45 | 0.34  | 0.022 | 2.4  | 0.03 | 0.64  | 2.20  | 0.33 | 12.7  | 4.6  | 66.5  | 24.5  | 123.9 | 26.3  | 311  | 47.1  | 9183  | 0.18 | 45  | 31  | 82  | 724   | Dolerite           |
| FC57-1-46 | 2.74  | 0.021 | 16.1 | 0.06 | 0.82  | 2.61  | 0.26 | 17.0  | 6.4  | 98.7  | 37.6  | 197.1 | 42.2  | 499  | 72.3  | 10396 | 1.71 | 329 | 187 | 201 | 4320  | Granitoid(<65%)    |
| FC57-1-47 | 1.28  | 0.027 | 20.7 | 0.09 | 1.58  | 2.99  | 1.20 | 15.5  | 4.6  | 62.9  | 21.8  | 110.3 | 23.4  | 291  | 42.4  | 8345  | 0.59 | 140 | 117 | 113 | 2691  | Dolerite           |
| FC57-1-48 | 5.07  | 0.000 | 49.7 | 0.04 | 1.16  | 2.39  | 0.42 | 12.8  | 4.9  | 69.4  | 25.7  | 136.3 | 30.2  | 368  | 53.1  | 9738  | 2.31 | 246 | 160 | 225 | 3694  | Dolerite           |
| FC57-1-49 | 2.36  | 0.000 | 33.2 | 0.06 | 1.19  | 2.83  | 0.65 | 15.8  | 5.1  | 62.8  | 21.9  | 105.3 | 20.0  | 229  | 32.0  | 9582  | 0.70 | 225 | 95  | 56  | 2197  | Dolerite           |
| FC57-1-51 | 4.06  | 0.013 | 10.0 | 0.09 | 2.39  | 5.61  | 0.17 | 32.5  | 11.0 | 143.6 | 51.4  | 245.6 | 48.0  | 554  | 72.8  | 9565  | 1.49 | 72  | 69  | 99  | 1588  | Dolerite           |
| FC57-1-52 | 1.64  | 0.000 | 20.0 | 0.02 | 0.45  | 1.27  | 0.44 | 7.4   | 3.1  | 48.6  | 19.7  | 108.7 | 25.4  | 338  | 52.3  | 10824 | 1.07 | 111 | 92  | 129 | 2112  | Granitoid(<65%)    |
| FC57-1-53 | 10.23 | 0.145 | 38.7 | 1.80 | 34.11 | 51.69 | 6.39 | 185.0 | 54.6 | 604.6 | 180.1 | 728.4 | 127.7 | 1283 | 153.6 | 6033  | 3.62 | 217 | 213 | 240 | 4903  | basalt             |
| FC57-1-54 | 0.64  | 0.005 | 0.6  | 0.03 | 0.83  | 3.43  | 0.08 | 26.8  | 11.9 | 168.5 | 58.6  | 284.0 | 56.2  | 635  | 87.7  | 10635 | 0.57 | 107 | 58  | 307 | 1346  | Granitoid(<70-75%) |
| FC57-1-55 | 0.97  | 0.013 | 14.5 | 0.13 | 2.94  | 6.13  | 1.55 | 28.7  | 9.6  | 127.2 | 46.2  | 234.9 | 49.5  | 595  | 88.5  | 9279  | 0.44 | 303 | 217 | 192 | 5005  | Dolerite           |
| FC57-1-56 | 2.07  | 2.512 | 31.4 | 0.60 | 3.56  | 3.77  | 0.91 | 20.1  | 6.8  | 96.6  | 35.6  | 182.6 | 38.3  | 457  | 65.7  | 9710  | 1.26 | 368 | 222 | 164 | 5112  | Dolerite           |
| FC57-1-57 | 1.80  | 0.195 | 22.6 | 0.66 | 8.64  | 8.92  | 2.92 | 33.2  | 9.3  | 101.2 | 31.8  | 146.7 | 29.2  | 336  | 48.3  | 6793  | 0.95 | 586 | 249 | 122 | 5730  | basalt             |
| FC57-1-58 | 3.74  | 0.020 | 6.8  | 0.06 | 1.17  | 3.11  | 0.16 | 18.6  | 6.7  | 93.3  | 32.9  | 158.1 | 32.2  | 367  | 50.2  | 9960  | 1.57 | 108 | 73  | 115 | 1672  | Dolerite           |
| FC57-1-59 | 1.02  | 0.001 | 7.8  | 0.03 | 0.55  | 2.06  | 0.36 | 13.9  | 5.5  | 81.0  | 30.6  | 157.2 | 34.1  | 408  | 58.4  | 10778 | 0.56 | 43  | 31  | 41  | 725   | Granitoid(<65%)    |
| FC57-1-60 | 4.20  | 0.030 | 10.3 | 0.06 | 1.04  | 3.59  | 0.83 | 22.1  | 8.2  | 108.6 | 38.6  | 196.8 | 41.3  | 499  | 71.3  | 12478 | 2.35 | 354 | 191 | 364 | 4393  | Granitoid(<65%)    |
| FC57-1-61 | 2.76  | 0.001 | 19.0 | 0.03 | 0.88  | 2.15  | 0.37 | 13.8  | 5.2  | 73.6  | 27.8  | 142.7 | 30.4  | 371  | 54.7  | 9987  | 1.21 | 126 | 104 | 132 | 2408  | Dolerite           |
| FC57-1-62 | 1.53  | 0.018 | 9.2  | 0.09 | 1.62  | 3.41  | 0.60 | 17.5  | 5.8  | 75.2  | 26.5  | 123.7 | 25.4  | 301  | 43.0  | 8901  | 0.59 | 65  | 42  | 77  | 973   | Dolerite           |
| FC57-1-63 | 1.58  | 0.011 | 5.7  | 0.08 | 1.25  | 3.72  | 0.09 | 19.4  | 7.2  | 91.4  | 30.7  | 143.4 | 28.9  | 320  | 42.7  | 10279 | 1.07 | 191 | 151 | 363 | 3470  | Granitoid(<65%)    |
| FC57-1-64 | 1.81  | 0.022 | 12.5 | 0.05 | 1.30  | 4.58  | 2.13 | 23.9  | 6.8  | 73.2  | 22.3  | 98.0  | 19.3  | 214  | 30.1  | 10491 | 0.92 | 141 | 113 | 225 | 2610  | Granitoid(<65%)    |
| FC57-1-65 | 0.59  | 0.001 | 11.4 | 0.16 | 3.22  | 6.64  | 1.40 | 29.0  | 8.7  | 105.0 | 36.5  | 178.8 | 36.8  | 428  | 64.0  | 9495  | 0.33 | 183 | 80  | 211 | 1851  | Dolerite           |
| FC57-1-67 | 0.61  | 0.000 | 19.3 | 0.09 | 1.72  | 3.77  | 1.39 | 16.0  | 5.0  | 58.5  | 19.5  | 97.8  | 19.9  | 241  | 36.5  | 7473  | 0.30 | 76  | 51  | 66  | 1173  | basalt             |
| FC57-1-68 | 2.43  | 0.044 | 7.3  | 0.52 | 9.18  | 14.95 | 2.32 | 60.8  | 17.2 | 189.6 | 56.2  | 238.9 | 43.2  | 444  | 57.9  | 8885  | 1.26 | 105 | 107 | 129 | 2456  | Dolerite           |
| FC57-1-69 | 1.44  | 0.006 | 21.0 | 0.08 | 1.50  | 3.44  | 0.86 | 17.5  | 6.0  | 80.3  | 29.5  | 150.1 | 32.1  | 385  | 57.1  | 9324  | 0.73 | 160 | 145 | 135 | 3338  | Dolerite           |
| FC57-1-70 | 0.54  | 0.007 | 7.8  | 0.03 | 0.70  | 1.92  | 0.46 | 10.8  | 3.8  | 52.9  | 19.3  | 100.6 | 22.0  | 264  | 40.1  | 9882  | 0.29 | 65  | 46  | 56  | 1055  | Dolerite           |
| FC57-1-71 | 2.26  | 0.011 | 11.2 | 0.05 | 0.68  | 1.90  | 0.31 | 12.4  | 4.4  | 64.0  | 24.9  | 133.1 | 30.5  | 380  | 57.3  | 10917 | 1.44 | 181 | 124 | 233 | 2849  | Granitoid(<65%)    |
| FC57-1-72 | 1.67  | 0.000 | 20.7 | 0.02 | 0.71  | 2.11  | 0.36 | 13.6  | 5.1  | 77.5  | 31.1  | 168.4 | 37.3  | 471  | 70.8  | 10514 | 1.00 | 172 | 118 | 103 | 2709  | Granitoid(<65%)    |
| FC57-1-73 | 0.89  | 0.018 | 20.6 | 0.04 | 0.73  | 1.76  | 0.38 | 7.4   | 2.1  | 25.0  | 8.8   | 42.2  | 9.0   | 113  | 16.9  | 9928  | 0.45 | 109 | 52  | 94  | 1205  | carbonate          |

|                |       |       |      |      |      |       |      |      |      |       |      |       |      |     |       |       |      |     |     |     |      |                    |
|----------------|-------|-------|------|------|------|-------|------|------|------|-------|------|-------|------|-----|-------|-------|------|-----|-----|-----|------|--------------------|
| FC57-1-74      | 1.22  | 0.001 | 15.4 | 0.06 | 1.42 | 3.56  | 0.97 | 20.6 | 7.2  | 97.8  | 36.2 | 183.0 | 38.5 | 456 | 68.2  | 8947  | 0.64 | 103 | 73  | 63  | 1693 | Dolerite           |
| FC57-1-75      | 0.22  | 0.000 | 1.5  | 0.02 | 0.41 | 1.02  | 0.23 | 7.4  | 3.0  | 41.9  | 16.6 | 84.3  | 18.0 | 216 | 31.5  | 9465  | 0.11 | 31  | 24  | 43  | 555  | Dolerite           |
| FC57-1-77      | 5.23  | 0.029 | 15.1 | 0.17 | 3.12 | 7.26  | 0.13 | 35.8 | 12.4 | 155.0 | 53.5 | 246.6 | 45.7 | 491 | 67.3  | 7267  | 1.66 | 97  | 68  | 98  | 1566 | basalt             |
| FC57-1-78      | 1.11  | 0.030 | 17.9 | 0.32 | 6.14 | 10.00 | 2.27 | 39.6 | 11.0 | 124.0 | 40.7 | 188.2 | 36.7 | 426 | 61.2  | 8112  | 0.40 | 311 | 135 | 114 | 3107 | Dolerite           |
| FC57-1-79      | 2.39  | 0.026 | 41.4 | 0.10 | 1.84 | 4.19  | 0.92 | 20.6 | 6.9  | 93.3  | 33.4 | 169.3 | 35.5 | 428 | 62.2  | 9301  | 1.20 | 150 | 151 | 86  | 3480 | Dolerite           |
| FC57-1-80      | 4.24  | 0.012 | 50.8 | 0.07 | 1.44 | 3.23  | 0.52 | 18.2 | 6.7  | 94.3  | 34.2 | 177.1 | 38.9 | 473 | 69.0  | 9657  | 2.09 | 221 | 158 | 204 | 3652 | Dolerite           |
| FC57-1-81      | 3.41  | 0.020 | 52.2 | 0.10 | 1.72 | 4.04  | 0.81 | 24.5 | 8.5  | 114.1 | 41.9 | 208.9 | 42.5 | 510 | 73.7  | 9698  | 1.27 | 177 | 125 | 73  | 2884 | Dolerite           |
| FC57-1-82      | 13.89 | 0.022 | 14.9 | 0.01 | 0.77 | 2.41  | 0.18 | 16.8 | 7.0  | 101.2 | 38.0 | 191.8 | 39.3 | 447 | 58.7  | 10411 | 5.28 | 171 | 90  | 192 | 2085 | Granitoid(<65%)    |
| FC57-1-83      | 5.35  | 0.007 | 10.6 | 0.10 | 2.17 | 4.41  | 0.20 | 23.0 | 6.5  | 77.7  | 24.4 | 105.9 | 19.7 | 201 | 27.3  | 7691  | 2.02 | 108 | 67  | 125 | 1547 | basalt             |
| FC57-1-84      | 7.34  | 0.010 | 83.7 | 0.23 | 4.39 | 9.54  | 2.01 | 46.2 | 15.1 | 192.1 | 66.6 | 316.8 | 61.5 | 686 | 95.6  | 8753  | 2.75 | 392 | 374 | 212 | 8632 | Dolerite           |
| FC57-1-85      | 1.33  | 0.003 | 11.9 | 0.06 | 1.15 | 3.01  | 0.33 | 17.5 | 6.2  | 84.0  | 30.7 | 151.8 | 31.7 | 375 | 54.4  | 9340  | 0.53 | 58  | 41  | 50  | 939  | Dolerite           |
| FC57-1-86      | 1.00  | 0.000 | 17.9 | 0.09 | 1.63 | 3.65  | 0.95 | 18.2 | 5.6  | 72.4  | 25.7 | 128.6 | 27.6 | 332 | 50.6  | 8954  | 0.59 | 129 | 95  | 83  | 2200 | Dolerite           |
| FC57-1-87      | 0.70  | 0.006 | 0.8  | 0.05 | 1.31 | 3.65  | 0.05 | 25.8 | 10.3 | 149.6 | 57.1 | 281.1 | 59.7 | 671 | 93.9  | 10478 | 0.54 | 185 | 73  | 223 | 1682 | Granitoid(<70-75%) |
| FC57-1-88      | 1.18  | 0.005 | 5.1  | 0.07 | 1.25 | 3.42  | 0.27 | 20.4 | 8.1  | 115.3 | 43.0 | 223.7 | 47.5 | 568 | 82.7  | 10296 | 0.74 | 167 | 79  | 168 | 1821 | Granitoid(<70-75%) |
| FC57-1-89      | 2.35  | 0.012 | 27.0 | 0.06 | 1.13 | 2.52  | 0.57 | 16.0 | 5.9  | 83.9  | 32.2 | 171.5 | 38.0 | 464 | 69.8  | 10240 | 1.29 | 267 | 248 | 234 | 5719 | Granitoid(<65%)    |
| FC57-1-90      | 0.91  | 0.011 | 14.0 | 0.05 | 1.57 | 3.26  | 0.82 | 15.5 | 5.0  | 63.0  | 23.1 | 119.1 | 25.7 | 310 | 49.0  | 8691  | 0.44 | 94  | 67  | 67  | 1541 | Dolerite           |
| FC57-1-91      | 2.56  | 0.000 | 23.3 | 0.05 | 1.11 | 3.44  | 0.55 | 21.7 | 7.5  | 105.4 | 39.2 | 201.2 | 43.0 | 510 | 75.3  | 10111 | 1.35 | 180 | 131 | 137 | 3025 | Dolerite           |
| FC57-1-92      | 0.52  | 0.008 | 7.7  | 0.03 | 0.65 | 1.71  | 0.31 | 9.4  | 2.7  | 34.6  | 11.8 | 57.2  | 11.5 | 134 | 20.0  | 9794  | 0.37 | 190 | 64  | 76  | 1485 | carbonate          |
| FC57-1-93      | 2.26  | 0.000 | 46.8 | 0.13 | 2.52 | 5.59  | 2.11 | 33.5 | 11.9 | 161.1 | 60.4 | 309.0 | 64.3 | 768 | 111.1 | 8067  | 0.69 | 350 | 270 | 199 | 6232 | Dolerite           |
| FC57-1-94      | 3.52  | 0.061 | 9.2  | 0.13 | 2.85 | 6.95  | 0.27 | 37.2 | 12.9 | 166.6 | 58.8 | 277.2 | 53.3 | 579 | 78.8  | 8909  | 1.44 | 90  | 90  | 102 | 2083 | Dolerite           |
| FC57-1-95      | 2.68  | 0.003 | 6.2  | 0.13 | 2.11 | 4.01  | 0.30 | 20.6 | 6.9  | 89.7  | 31.3 | 147.2 | 28.5 | 314 | 43.8  | 9359  | 1.26 | 88  | 93  | 81  | 2149 | Dolerite           |
| FC57-1-96      | 3.49  | 0.000 | 9.3  | 0.05 | 1.00 | 2.20  | 0.16 | 14.1 | 4.8  | 65.6  | 23.7 | 118.9 | 23.7 | 265 | 37.5  | 9994  | 1.47 | 76  | 72  | 73  | 1651 | Dolerite           |
| FC57-1-97      | 0.46  | 0.018 | 8.2  | 0.01 | 0.58 | 1.61  | 0.64 | 10.6 | 3.5  | 52.7  | 20.0 | 111.0 | 25.6 | 336 | 55.2  | 10509 | 0.22 | 90  | 75  | 82  | 1740 | Granitoid(<65%)    |
| FC57-1-98      | 3.08  | 0.019 | 37.8 | 0.09 | 1.47 | 3.80  | 0.91 | 20.6 | 7.5  | 99.5  | 38.8 | 200.6 | 43.9 | 534 | 81.0  | 10152 | 1.55 | 352 | 270 | 208 | 6221 | Granitoid(<70-75%) |
| FC57-1-99      | 2.13  | 0.000 | 11.9 | 0.04 | 1.13 | 2.81  | 0.33 | 19.9 | 6.8  | 93.8  | 34.1 | 173.4 | 35.2 | 409 | 58.7  | 10006 | 1.02 | 127 | 88  | 144 | 2029 | Dolerite           |
| 17TH-09-01-102 | 0.73  | 0.000 | 2.8  | 0.09 | 1.17 | 3.84  | 0.46 | 24.9 | 9.6  | 133.7 | 50.8 | 248.8 | 52.8 | 584 | 86.5  | 10826 | 0.46 | 84  | 67  | 110 | 1616 | Granitoid(<70-75%) |
| 17TH-09-01-103 | 2.79  | 0.047 | 15.1 | 0.17 | 2.07 | 4.09  | 0.35 | 16.6 | 5.4  | 66.5  | 23.1 | 102.6 | 21.7 | 231 | 33.1  | 9716  | 1.51 | 190 | 196 | 136 | 4694 | Dolerite           |
| 17TH-09-01-108 | 1.63  | 0.043 | 27.0 | 0.17 | 3.00 | 6.17  | 1.73 | 32.0 | 10.5 | 126.6 | 45.1 | 213.1 | 45.7 | 505 | 73.3  | 9221  | 0.86 | 206 | 142 | 93  | 3416 | Dolerite           |
| 17TH-09-01-114 | 2.02  | 0.618 | 17.6 | 0.46 | 2.84 | 4.23  | 0.54 | 18.0 | 6.0  | 76.3  | 27.6 | 133.6 | 27.1 | 305 | 43.3  | 10548 | 1.25 | 403 | 241 | 311 | 5774 | Granitoid(<65%)    |
| 17TH-09-01-115 | 1.31  | 0.117 | 2.5  | 0.11 | 1.81 | 3.75  | 0.33 | 23.1 | 8.5  | 113.1 | 41.6 | 198.2 | 42.1 | 460 | 67.8  | 10166 | 0.68 | 113 | 82  | 113 | 1957 | Granitoid(<65%)    |
| 17TH-09-01-119 | 2.60  | 0.084 | 13.1 | 0.12 | 1.44 | 2.67  | 0.39 | 14.1 | 5.2  | 70.7  | 26.4 | 131.7 | 29.0 | 339 | 49.7  | 10935 | 1.55 | 163 | 144 | 168 | 3450 | Granitoid(<65%)    |
| 17TH-09-01-120 | 3.09  | 0.002 | 25.2 | 0.06 | 1.10 | 2.17  | 0.29 | 12.0 | 4.4  | 58.7  | 21.3 | 107.7 | 23.8 | 282 | 41.8  | 10737 | 1.56 | 135 | 129 | 115 | 3107 | Granitoid(<65%)    |
| 17TH-09-01-123 | 0.82  | 0.223 | 6.7  | 0.65 | 6.97 | 8.86  | 1.25 | 38.8 | 12.8 | 159.0 | 55.7 | 255.1 | 52.2 | 563 | 82.0  | 10898 | 0.58 | 230 | 217 | 229 | 5205 | Granitoid(<70-75%) |
| 17TH-09-01-126 | 2.35  | 0.005 | 7.2  | 0.06 | 1.26 | 2.82  | 0.28 | 16.3 | 5.8  | 73.2  | 26.2 | 122.0 | 25.6 | 275 | 39.8  | 9630  | 1.01 | 67  | 70  | 45  | 1682 | Dolerite           |
| 17TH-09-01-128 | 2.30  | 0.191 | 30.6 | 0.26 | 3.65 | 5.64  | 1.27 | 26.2 | 8.2  | 98.8  | 32.9 | 151.8 | 31.8 | 352 | 49.2  | 9711  | 1.57 | 200 | 189 | 149 | 4528 | Dolerite           |
| 17TH-09-01-130 | 5.67  | 0.067 | 38.0 | 0.11 | 1.20 | 1.86  | 0.45 | 10.6 | 4.5  | 69.5  | 28.5 | 157.6 | 39.8 | 512 | 78.8  | 11411 | 4.09 | 280 | 237 | 383 | 5679 | Granitoid(<70-75%) |
| 17TH-09-01-131 | 3.97  | 0.002 | 15.7 | 0.05 | 1.13 | 3.18  | 0.33 | 17.4 | 6.6  | 86.6  | 30.7 | 147.6 | 30.9 | 335 | 47.4  | 10615 | 2.04 | 186 | 181 | 138 | 4346 | Granitoid(<65%)    |
| 17TH-09-01-132 | 3.90  | 0.001 | 13.2 | 0.09 | 1.73 | 4.29  | 0.25 | 20.4 | 7.1  | 91.6  | 31.2 | 145.0 | 30.3 | 325 | 46.8  | 10128 | 1.57 | 200 | 222 | 105 | 5318 | Dolerite           |
| 17TH-09-01-135 | 6.14  | 0.000 | 37.5 | 0.06 | 1.09 | 2.14  | 0.47 | 12.7 | 4.3  | 58.6  | 21.4 | 106.4 | 23.6 | 275 | 42.6  | 9734  | 3.32 | 181 | 156 | 117 | 3753 | Dolerite           |
| 17TH-09-01-138 | 2.37  | 0.891 | 34.7 | 0.59 | 5.97 | 7.47  | 1.81 | 30.5 | 9.9  | 122.4 | 43.3 | 200.6 | 40.6 | 439 | 66.6  | 8559  | 1.24 | 363 | 219 | 143 | 5245 | Dolerite           |
| 17TH-02-01-01  |       | 0.007 | 15.2 | 0.05 | 0.43 | 1.92  | 0.35 | 9.4  | 3.4  | 46.3  | 18.2 | 94.7  | 21.1 | 241 | 44.8  |       |      | 216 | 133 | 130 | 3518 |                    |
| 17TH-02-01-04  |       | 0.000 | 11.0 | 0.04 | 0.60 | 2.22  | 0.29 | 12.3 | 4.9  | 65.5  | 25.6 | 128.7 | 26.5 | 288 | 48.6  |       |      | 125 | 72  | 98  | 1901 |                    |

|                |        |       |       |       |       |      |       |      |       |       |        |       |      |       |      |     |     |       |
|----------------|--------|-------|-------|-------|-------|------|-------|------|-------|-------|--------|-------|------|-------|------|-----|-----|-------|
| 17TH-02-01-05  | 0.394  | 29.5  | 0.18  | 1.31  | 2.23  | 0.28 | 12.6  | 4.5  | 57.8  | 22.5  | 117.6  | 25.6  | 303  | 50.2  | 291  | 178 | 188 | 4720  |
| 17TH-02-01-06  | 0.040  | 35.5  | 0.14  | 2.27  | 4.90  | 1.19 | 25.1  | 8.9  | 113.0 | 42.7  | 212.0  | 43.7  | 477  | 80.8  | 300  | 189 | 141 | 5014  |
| 17TH-02-01-07  | 0.000  | 11.3  | 0.07  | 1.06  | 2.30  | 0.42 | 16.1  | 5.6  | 73.2  | 27.7  | 138.7  | 29.4  | 318  | 52.7  | 176  | 101 | 119 | 2669  |
| 17TH-02-01-08  | 1.546  | 13.0  | 0.17  | 1.18  | 2.19  | 0.58 | 12.5  | 4.3  | 53.0  | 21.4  | 111.5  | 23.6  | 263  | 48.8  | 240  | 136 | 175 | 3615  |
| 17TH-02-01-09  | 16.206 | 154.6 | 10.65 | 60.38 | 37.26 | 4.39 | 178.6 | 59.0 | 755.4 | 254.6 | 1119.6 | 201.7 | 2002 | 273.6 | 1378 | 798 | 551 | 21187 |
| 17TH-02-01-100 | 0.752  | 19.6  | 1.21  | 10.12 | 16.88 | 4.77 | 82.7  | 36.8 | 552.6 | 223.3 | 1183.6 | 267.8 | 3061 | 508.7 | 380  | 209 | 546 | 5543  |
| 17TH-02-01-11  | 0.001  | 17.2  | 0.05  | 0.72  | 2.62  | 0.32 | 9.7   | 3.2  | 39.5  | 14.5  | 67.4   | 13.9  | 155  | 24.8  | 258  | 93  | 101 | 2464  |
| 17TH-02-01-12  | 0.027  | 24.8  | 0.25  | 3.20  | 6.07  | 0.80 | 28.6  | 9.3  | 115.8 | 42.5  | 207.1  | 44.6  | 500  | 84.6  | 510  | 330 | 212 | 8754  |
| 17TH-02-01-14  | 0.032  | 17.2  | 0.08  | 1.25  | 1.84  | 0.34 | 11.3  | 3.8  | 47.9  | 17.4  | 82.1   | 17.1  | 193  | 31.4  | 227  | 200 | 192 | 5300  |
| 17TH-02-01-15  | 0.000  | 10.5  | 0.05  | 1.37  | 2.74  | 0.38 | 18.0  | 6.2  | 82.8  | 31.9  | 156.9  | 31.1  | 333  | 56.5  | 339  | 185 | 244 | 4921  |
| 17TH-02-01-16  | 0.027  | 2.2   | 0.04  | 1.30  | 3.28  | 0.12 | 24.5  | 10.8 | 156.8 | 61.9  | 313.1  | 64.5  | 719  | 114.9 | 264  | 94  | 346 | 2489  |
| 17TH-02-01-18  | 0.090  | 13.5  | 0.13  | 2.12  | 5.12  | 0.91 | 26.8  | 8.5  | 104.2 | 35.9  | 162.0  | 33.1  | 358  | 55.4  | 139  | 123 | 93  | 3259  |
| 17TH-02-01-19  | 1.508  | 32.2  | 0.91  | 9.82  | 13.32 | 0.47 | 63.8  | 21.4 | 269.0 | 99.2  | 459.4  | 84.5  | 873  | 137.9 | 265  | 171 | 181 | 4543  |
| 17TH-02-01-21  | 0.143  | 49.2  | 0.22  | 2.99  | 5.36  | 0.98 | 25.9  | 9.3  | 121.0 | 48.1  | 242.3  | 54.5  | 642  | 107.4 | 629  | 408 | 323 | 10829 |
| 17TH-02-01-22  | 1.328  | 46.5  | 1.63  | 9.88  | 7.71  | 2.26 | 29.0  | 8.7  | 106.1 | 38.3  | 188.5  | 39.8  | 467  | 77.2  | 568  | 331 | 412 | 8789  |
| 17TH-02-01-23  | 0.459  | 6.2   | 0.14  | 1.63  | 2.18  | 0.56 | 13.3  | 4.0  | 46.9  | 17.4  | 82.8   | 16.8  | 180  | 29.4  | 91   | 50  | 64  | 1329  |
| 17TH-02-01-24  | 0.028  | 4.8   | 0.11  | 2.29  | 5.08  | 0.46 | 33.8  | 11.5 | 154.6 | 57.3  | 265.5  | 52.5  | 557  | 86.4  | 247  | 127 | 181 | 3383  |
| 17TH-02-01-25  | 0.000  | 27.8  | 0.02  | 0.52  | 2.03  | 0.23 | 14.2  | 5.5  | 73.4  | 29.2  | 146.4  | 31.8  | 353  | 57.5  | 295  | 182 | 213 | 4843  |
| 17TH-02-01-26  | 0.000  | 9.9   | 0.07  | 1.66  | 2.88  | 0.59 | 15.7  | 5.5  | 69.0  | 24.6  | 114.5  | 23.6  | 262  | 41.7  | 256  | 125 | 203 | 3307  |
| 17TH-02-01-27  | 0.000  | 8.9   | 0.06  | 0.73  | 1.11  | 0.17 | 9.4   | 3.1  | 45.7  | 17.3  | 82.5   | 17.4  | 190  | 30.0  | 128  | 73  | 105 | 1941  |
| 17TH-02-01-28  | 0.320  | 35.3  | 0.26  | 3.06  | 4.84  | 1.11 | 26.5  | 8.9  | 117.5 | 42.9  | 208.4  | 42.6  | 469  | 76.5  | 189  | 130 | 85  | 3438  |
| 17TH-02-01-29  | 0.000  | 20.5  | 0.04  | 0.65  | 1.82  | 0.23 | 12.0  | 4.5  | 57.6  | 23.3  | 118.7  | 25.8  | 306  | 49.5  | 156  | 136 | 118 | 3610  |
| 17TH-02-01-30  | 0.035  | 32.5  | 0.18  | 2.61  | 4.39  | 1.10 | 25.8  | 9.2  | 116.1 | 44.2  | 213.2  | 43.0  | 481  | 73.4  | 415  | 278 | 248 | 7385  |
| 17TH-02-01-31  | 0.000  | 14.3  | 0.09  | 1.31  | 2.73  | 0.39 | 13.6  | 4.9  | 63.0  | 22.9  | 110.6  | 22.3  | 245  | 40.5  | 135  | 115 | 107 | 3045  |
| 17TH-02-01-32  | 0.000  | 10.9  | 0.06  | 1.13  | 2.32  | 0.38 | 16.2  | 6.4  | 83.4  | 31.1  | 152.1  | 31.6  | 347  | 59.7  | 110  | 68  | 72  | 1804  |
| 17TH-02-01-33  | 0.153  | 49.7  | 0.20  | 2.71  | 4.65  | 0.55 | 26.7  | 9.7  | 133.9 | 53.2  | 274.5  | 61.9  | 728  | 117.5 | 743  | 463 | 496 | 12287 |
| 17TH-02-01-34  | 0.004  | 20.0  | 0.11  | 1.39  | 3.05  | 0.41 | 17.6  | 6.3  | 77.4  | 28.4  | 139.3  | 28.8  | 314  | 52.0  | 142  | 123 | 120 | 3275  |
| 17TH-02-01-35  | 0.012  | 13.5  | 0.02  | 0.35  | 0.88  | 0.31 | 8.4   | 3.3  | 40.9  | 16.0  | 80.1   | 17.0  | 194  | 32.4  | 186  | 70  | 118 | 1866  |
| 17TH-02-01-36  | 0.029  | 49.2  | 0.62  | 9.85  | 13.07 | 6.61 | 53.1  | 15.6 | 171.7 | 57.5  | 257.9  | 49.2  | 518  | 83.5  | 252  | 173 | 102 | 4581  |
| 17TH-02-01-37  | 0.000  | 28.6  | 0.10  | 1.29  | 3.35  | 0.58 | 17.4  | 6.1  | 80.0  | 30.3  | 150.0  | 31.7  | 355  | 58.6  | 138  | 89  | 88  | 2360  |
| 17TH-02-01-38  | 0.008  | 27.2  | 0.06  | 0.66  | 1.87  | 0.17 | 12.6  | 4.5  | 66.6  | 24.7  | 129.9  | 28.5  | 327  | 54.9  | 223  | 205 | 196 | 5454  |
| 17TH-02-01-39  | 0.000  | 21.3  | 0.04  | 0.71  | 2.01  | 0.19 | 11.2  | 4.1  | 57.4  | 22.5  | 116.5  | 25.0  | 288  | 47.2  | 156  | 139 | 125 | 3687  |
| 17TH-02-01-40  | 0.000  | 10.4  | 0.10  | 1.31  | 2.33  | 0.45 | 13.8  | 4.7  | 59.9  | 22.0  | 104.5  | 21.1  | 231  | 37.4  | 68   | 59  | 59  | 1559  |
| 17TH-02-01-41  | 0.030  | 20.2  | 0.03  | 1.11  | 2.76  | 0.36 | 16.0  | 5.0  | 69.8  | 26.5  | 132.9  | 27.6  | 308  | 47.4  | 323  | 194 | 205 | 5151  |
| 17TH-02-01-42  | 0.002  | 26.2  | 0.08  | 1.22  | 3.41  | 0.51 | 16.3  | 5.8  | 74.5  | 28.2  | 135.1  | 28.9  | 323  | 52.4  | 206  | 182 | 162 | 4828  |
| 17TH-02-01-43  | 0.000  | 16.4  | 0.08  | 0.83  | 2.59  | 0.48 | 18.2  | 7.3  | 93.1  | 34.6  | 165.0  | 34.0  | 382  | 59.8  | 281  | 171 | 218 | 4529  |
| 17TH-02-01-44  | 0.000  | 11.9  | 0.08  | 0.98  | 1.65  | 0.17 | 12.1  | 5.0  | 67.2  | 26.4  | 134.3  | 27.9  | 313  | 51.0  | 285  | 160 | 234 | 4236  |
| 17TH-02-01-45  | 0.000  | 29.1  | 0.10  | 1.69  | 2.28  | 0.72 | 14.3  | 4.7  | 55.5  | 19.5  | 92.4   | 19.4  | 222  | 35.7  | 216  | 144 | 116 | 3835  |
| 17TH-02-01-47  | 2.904  | 39.2  | 1.11  | 6.30  | 3.60  | 0.37 | 20.5  | 7.0  | 98.3  | 39.7  | 203.8  | 42.5  | 487  | 82.4  | 427  | 265 | 264 | 7029  |
| 17TH-02-01-48  | 0.000  | 11.3  | 0.06  | 0.43  | 1.66  | 0.53 | 7.6   | 2.4  | 28.3  | 9.5   | 44.0   | 9.0   | 104  | 16.5  | 132  | 85  | 84  | 2246  |
| 17TH-02-01-49  | 0.005  | 22.3  | 0.03  | 1.11  | 2.90  | 0.59 | 15.9  | 5.7  | 73.7  | 27.9  | 135.3  | 27.2  | 304  | 52.1  | 127  | 82  | 73  | 2172  |
| 17TH-02-01-50  | 1.079  | 11.8  | 0.73  | 5.48  | 4.14  | 0.26 | 20.7  | 7.6  | 98.6  | 35.9  | 178.1  | 34.7  | 381  | 61.7  | 344  | 163 | 266 | 4330  |



|               |       |      |      |       |       |      |      |      |       |       |       |       |      |       |     |     |     |       |
|---------------|-------|------|------|-------|-------|------|------|------|-------|-------|-------|-------|------|-------|-----|-----|-----|-------|
| 17TH-02-01-51 | 0.281 | 15.1 | 0.15 | 0.93  | 1.70  | 0.27 | 10.1 | 3.8  | 50.3  | 19.8  | 97.1  | 20.7  | 246  | 39.4  | 124 | 104 | 114 | 2762  |
| 17TH-02-01-52 | 0.005 | 9.4  | 0.05 | 0.90  | 2.46  | 0.33 | 15.6 | 5.8  | 77.5  | 30.3  | 148.4 | 30.4  | 347  | 57.0  | 186 | 95  | 164 | 2534  |
| 17TH-02-01-53 | 0.344 | 12.4 | 0.18 | 1.77  | 2.86  | 0.39 | 16.9 | 5.4  | 67.9  | 26.0  | 122.9 | 23.8  | 259  | 44.5  | 260 | 143 | 175 | 3792  |
| 17TH-02-01-54 | 0.050 | 32.0 | 0.11 | 2.50  | 5.33  | 1.99 | 34.5 | 11.6 | 154.3 | 57.8  | 273.7 | 52.7  | 585  | 98.7  | 181 | 124 | 72  | 3303  |
| 17TH-02-01-55 | 0.023 | 6.0  | 0.02 | 0.86  | 2.41  | 0.18 | 20.4 | 8.0  | 107.1 | 41.6  | 203.5 | 42.6  | 470  | 76.6  | 214 | 144 | 250 | 3824  |
| 17TH-02-01-56 | 0.041 | 4.2  | 0.07 | 1.35  | 2.26  | 0.51 | 9.1  | 2.6  | 29.7  | 11.4  | 56.5  | 12.6  | 152  | 27.5  | 211 | 149 | 172 | 3952  |
| 17TH-02-01-57 | 0.000 | 8.1  | 0.05 | 1.76  | 2.93  | 0.56 | 15.8 | 4.9  | 61.0  | 21.6  | 96.6  | 18.8  | 204  | 31.5  | 96  | 40  | 25  | 1069  |
| 17TH-02-01-58 | 6.782 | 32.3 | 3.96 | 22.24 | 7.31  | 0.76 | 21.3 | 6.1  | 78.7  | 29.3  | 138.6 | 27.4  | 305  | 52.1  | 133 | 71  | 95  | 1893  |
| 17TH-02-01-59 | 0.038 | 16.9 | 0.11 | 1.81  | 3.12  | 0.70 | 19.8 | 6.4  | 82.7  | 31.1  | 152.8 | 33.3  | 377  | 65.9  | 259 | 161 | 125 | 4277  |
| 17TH-02-01-60 | 0.000 | 15.9 | 0.05 | 0.72  | 2.00  | 0.31 | 11.5 | 4.2  | 53.6  | 19.6  | 95.0  | 19.8  | 218  | 38.0  | 686 | 288 | 145 | 7635  |
| 17TH-02-01-61 | 0.539 | 55.4 | 0.59 | 5.15  | 7.58  | 1.88 | 30.8 | 10.3 | 124.7 | 46.1  | 224.4 | 47.7  | 559  | 92.8  | 370 | 368 | 253 | 9781  |
| 17TH-02-01-62 | 0.000 | 20.7 | 0.03 | 0.57  | 1.41  | 0.73 | 9.3  | 3.3  | 42.4  | 16.1  | 76.0  | 15.9  | 180  | 30.5  | 328 | 146 | 230 | 3873  |
| 17TH-02-01-64 | 0.000 | 16.6 | 0.10 | 2.40  | 4.53  | 1.16 | 20.8 | 6.2  | 76.6  | 27.3  | 127.1 | 24.9  | 265  | 44.7  | 94  | 64  | 32  | 1693  |
| 17TH-02-01-66 | 0.028 | 12.3 | 0.16 | 2.71  | 6.90  | 2.80 | 34.9 | 10.1 | 100.0 | 30.2  | 128.2 | 25.7  | 267  | 44.3  | 152 | 132 | 139 | 3501  |
| 17TH-02-01-67 | 0.041 | 8.4  | 0.04 | 1.05  | 2.18  | 0.30 | 13.4 | 4.7  | 60.9  | 23.0  | 113.9 | 23.1  | 246  | 40.1  | 130 | 62  | 84  | 1643  |
| 17TH-02-01-69 | 0.000 | 13.4 | 0.05 | 0.88  | 1.73  | 0.19 | 12.4 | 4.3  | 56.1  | 21.9  | 106.5 | 22.5  | 250  | 39.9  | 159 | 137 | 162 | 3636  |
| 17TH-02-01-70 | 0.032 | 34.9 | 0.14 | 1.86  | 4.27  | 0.67 | 17.2 | 5.4  | 62.9  | 21.7  | 101.3 | 22.0  | 255  | 42.1  | 241 | 184 | 120 | 4890  |
| 17TH-02-01-71 | 1.007 | 24.3 | 0.61 | 8.33  | 11.23 | 3.47 | 51.7 | 14.8 | 170.7 | 62.1  | 282.6 | 51.9  | 516  | 88.8  | 278 | 193 | 123 | 5131  |
| 17TH-02-01-72 | 0.000 | 22.5 | 0.06 | 1.56  | 3.08  | 0.35 | 15.8 | 5.6  | 73.8  | 27.8  | 140.1 | 29.5  | 317  | 53.6  | 195 | 187 | 183 | 4952  |
| 17TH-02-01-73 | 0.000 | 12.0 | 0.00 | 0.87  | 2.95  | 0.17 | 20.0 | 6.9  | 93.7  | 36.2  | 172.9 | 34.7  | 379  | 62.6  | 183 | 113 | 134 | 2998  |
| 17TH-02-01-74 | 0.017 | 73.9 | 0.08 | 2.06  | 3.93  | 0.74 | 19.4 | 6.6  | 86.6  | 33.0  | 163.9 | 35.3  | 417  | 66.1  | 342 | 370 | 200 | 9834  |
| 17TH-02-01-76 | 0.104 | 44.0 | 0.64 | 9.54  | 15.57 | 4.68 | 92.9 | 29.7 | 355.1 | 128.6 | 604.6 | 115.8 | 1204 | 200.5 | 851 | 634 | 238 | 16827 |
| 17TH-02-01-77 | 0.000 | 27.9 | 0.00 | 0.78  | 1.69  | 0.09 | 10.3 | 4.0  | 55.1  | 22.4  | 120.9 | 27.2  | 311  | 55.5  | 284 | 177 | 195 | 4700  |
| 17TH-02-01-78 | 0.000 | 9.3  | 0.13 | 2.42  | 6.37  | 0.90 | 52.0 | 19.2 | 262.1 | 102.9 | 518.9 | 107.2 | 1151 | 197.3 | 223 | 138 | 174 | 3665  |
| 17TH-02-01-80 | 0.040 | 28.4 | 0.03 | 0.81  | 2.10  | 0.24 | 13.5 | 5.8  | 76.0  | 29.7  | 156.8 | 33.2  | 363  | 63.1  | 264 | 170 | 172 | 4515  |
| 17TH-02-01-81 | 0.502 | 39.7 | 0.50 | 5.03  | 5.86  | 1.64 | 26.6 | 9.1  | 121.2 | 47.4  | 246.2 | 54.2  | 640  | 118.4 | 503 | 375 | 244 | 9950  |
| 17TH-02-01-82 | 0.050 | 5.1  | 0.34 | 4.63  | 8.21  | 1.09 | 44.8 | 14.3 | 175.7 | 61.7  | 280.3 | 53.5  | 563  | 91.2  | 285 | 179 | 187 | 4742  |
| 17TH-02-01-83 | 0.000 | 25.6 | 0.11 | 1.38  | 3.56  | 0.31 | 23.1 | 8.5  | 127.0 | 49.3  | 261.5 | 55.6  | 645  | 107.9 | 271 | 177 | 203 | 4708  |
| 17TH-02-01-84 | 0.335 | 35.1 | 0.48 | 4.02  | 4.72  | 1.91 | 16.6 | 5.1  | 60.5  | 21.7  | 105.8 | 23.3  | 282  | 54.5  | 587 | 426 | 336 | 11315 |
| 17TH-02-01-85 | 0.113 | 16.3 | 0.14 | 1.66  | 2.60  | 1.09 | 16.9 | 5.4  | 71.8  | 29.2  | 158.3 | 34.8  | 412  | 74.8  | 245 | 161 | 178 | 4262  |
| 17TH-02-01-86 | 0.000 | 12.9 | 0.00 | 0.97  | 2.08  | 0.12 | 14.8 | 5.3  | 66.7  | 25.5  | 122.4 | 24.5  | 265  | 44.9  | 324 | 177 | 240 | 4704  |
| 17TH-02-01-88 | 0.041 | 25.4 | 0.07 | 0.88  | 2.12  | 0.75 | 15.3 | 5.4  | 74.7  | 29.1  | 144.8 | 29.9  | 327  | 58.4  | 195 | 118 | 100 | 3135  |
| 17TH-02-01-90 | 0.348 | 24.2 | 0.12 | 2.45  | 3.95  | 0.95 | 18.1 | 5.4  | 69.1  | 24.5  | 118.8 | 25.7  | 285  | 51.2  | 163 | 120 | 99  | 3179  |
| 17TH-02-01-91 | 0.269 | 8.5  | 0.43 | 4.52  | 5.96  | 1.98 | 24.4 | 9.4  | 129.6 | 46.1  | 244.0 | 52.3  | 666  | 110.3 | 189 | 205 | 198 | 5446  |
| 17TH-02-01-92 | 0.130 | 13.5 | 0.95 | 10.33 | 14.41 | 6.13 | 58.3 | 16.6 | 164.8 | 50.2  | 218.9 | 45.9  | 527  | 92.7  | 342 | 235 | 257 | 6231  |
| 17TH-02-01-94 | 0.000 | 53.7 | 0.12 | 1.36  | 3.50  | 0.97 | 20.2 | 7.0  | 90.2  | 33.9  | 166.1 | 34.6  | 387  | 66.6  | 250 | 210 | 228 | 5573  |
| 17TH-02-01-95 | 0.649 | 25.4 | 0.74 | 7.12  | 9.94  | 2.79 | 37.6 | 11.9 | 135.7 | 44.8  | 208.9 | 40.2  | 424  | 71.1  | 440 | 308 | 328 | 8188  |
| 17TH-02-01-98 | 0.071 | 1.9  | 0.07 | 0.65  | 1.94  | 0.38 | 13.4 | 6.0  | 74.1  | 21.5  | 78.5  | 12.7  | 116  | 16.5  | 141 | 24  | 311 | 631   |
| 17TH-02-01-99 | 0.084 | 6.8  | 0.28 | 1.91  | 2.82  | 0.24 | 12.9 | 4.8  | 55.4  | 20.6  | 98.9  | 19.7  | 209  | 32.8  | 180 | 129 | 253 | 3416  |
| 17TH-09-01-03 | 1.937 | 71.3 | 0.80 | 6.77  | 11.34 | 2.51 | 41.3 | 12.9 | 151.9 | 54.2  | 245.5 | 53.1  | 493  | 90.7  | 444 | 332 | 188 | 12517 |
| 17TH-09-01-08 | 0.039 | 28.9 | 0.21 | 2.93  | 6.76  | 2.98 | 34.3 | 12.1 | 147.5 | 54.9  | 255.9 | 55.0  | 557  | 97.4  | 256 | 119 | 125 | 4493  |
| 17TH-09-01-09 | 0.487 | 16.2 | 0.22 | 1.59  | 2.64  | 0.29 | 15.6 | 5.7  | 70.2  | 28.2  | 128.8 | 27.6  | 264  | 48.5  | 221 | 99  | 157 | 3716  |

|                |        |       |      |       |       |      |      |      |       |       |       |       |     |       |      |     |     |       |
|----------------|--------|-------|------|-------|-------|------|------|------|-------|-------|-------|-------|-----|-------|------|-----|-----|-------|
| 17TH-09-01-10  | 0.028  | 10.9  | 0.03 | 0.58  | 0.78  | 0.17 | 6.0  | 2.6  | 32.7  | 13.7  | 69.8  | 17.4  | 182 | 32.7  | 355  | 121 | 239 | 4549  |
| 17TH-09-01-100 | 16.909 | 59.0  | 4.78 | 20.90 | 6.98  | 0.48 | 20.3 | 6.4  | 81.5  | 34.2  | 170.9 | 39.1  | 380 | 76.7  | 57   | 187 | 314 | 7052  |
| 17TH-09-01-13  | 1.617  | 10.3  | 1.37 | 12.21 | 16.36 | 1.98 | 66.0 | 16.7 | 129.9 | 30.6  | 92.2  | 14.8  | 110 | 16.9  | 288  | 274 | 279 | 10338 |
| 17TH-09-01-14  | 0.000  | 9.6   | 0.14 | 2.38  | 3.52  | 0.26 | 19.5 | 6.8  | 77.9  | 27.1  | 117.4 | 24.4  | 234 | 38.6  | 181  | 117 | 123 | 4404  |
| 17TH-09-01-15  | 0.219  | 23.2  | 0.18 | 5.62  | 5.13  | 0.30 | 33.0 | 12.4 | 147.5 | 58.3  | 259.9 | 52.1  | 481 | 82.5  | 484  | 239 | 300 | 9013  |
| 17TH-09-01-17  | 0.000  | 37.8  | 0.13 | 2.36  | 3.79  | 1.72 | 21.0 | 5.7  | 71.4  | 26.1  | 114.4 | 23.8  | 244 | 42.0  | 163  | 80  | 47  | 3000  |
| 17TH-09-01-18  | 0.167  | 4.6   | 0.11 | 2.01  | 3.61  | 0.34 | 21.3 | 7.9  | 104.5 | 42.7  | 193.7 | 42.6  | 412 | 72.3  | 254  | 128 | 198 | 4808  |
| 17TH-09-01-21  | 0.655  | 34.9  | 1.00 | 6.86  | 7.96  | 1.45 | 37.1 | 13.6 | 165.0 | 66.3  | 303.3 | 64.0  | 581 | 103.5 | 530  | 348 | 313 | 13134 |
| 17TH-09-01-23  | 14.263 | 43.1  | 4.82 | 24.20 | 9.57  | 2.52 | 15.0 | 4.1  | 42.2  | 15.5  | 73.1  | 17.4  | 183 | 33.5  | 208  | 129 | 265 | 4854  |
| 17TH-09-01-24  | 0.047  | 25.0  | 0.10 | 1.91  | 5.17  | 0.46 | 31.0 | 12.4 | 164.3 | 65.2  | 308.5 | 62.5  | 582 | 97.2  | 415  | 179 | 340 | 6745  |
| 17TH-09-01-26  | 0.018  | 2.0   | 0.01 | 0.10  | 0.66  | 0.27 | 3.3  | 0.9  | 8.4   | 3.2   | 14.2  | 3.4   | 37  | 6.4   | 119  | 27  | 86  | 1001  |
| 17TH-09-01-28  | 0.166  | 5.4   | 0.55 | 6.99  | 9.48  | 0.90 | 46.6 | 14.4 | 165.5 | 62.2  | 276.5 | 56.5  | 501 | 95.0  | 316  | 241 | 113 | 9097  |
| 17TH-09-01-29  | 0.028  | 12.5  | 0.06 | 1.00  | 1.67  | 0.22 | 11.8 | 4.0  | 51.4  | 19.5  | 90.9  | 19.6  | 178 | 33.8  | 579  | 168 | 236 | 6332  |
| 17TH-09-01-34  | 0.057  | 16.6  | 0.41 | 4.61  | 8.83  | 1.17 | 39.5 | 12.0 | 138.1 | 51.0  | 219.5 | 44.5  | 385 | 73.1  | 291  | 210 | 147 | 7930  |
| 17TH-09-01-37  | 0.075  | 17.6  | 0.18 | 2.19  | 4.57  | 0.29 | 20.8 | 7.0  | 81.3  | 29.0  | 127.3 | 26.1  | 234 | 41.4  | 500  | 352 | 252 | 13266 |
| 17TH-09-01-39  | 0.436  | 18.6  | 0.34 | 2.97  | 2.90  | 0.35 | 13.9 | 5.0  | 63.1  | 24.4  | 115.8 | 26.6  | 250 | 45.9  | 287  | 186 | 217 | 7018  |
| 17TH-09-01-40  | 0.011  | 47.3  | 0.16 | 3.89  | 7.69  | 2.38 | 49.4 | 16.1 | 184.8 | 71.2  | 311.3 | 63.9  | 578 | 112.9 | 311  | 173 | 120 | 6503  |
| 17TH-09-01-41  | 0.688  | 52.7  | 0.54 | 5.45  | 8.72  | 2.25 | 37.4 | 11.1 | 130.7 | 48.6  | 214.7 | 45.1  | 437 | 77.1  | 167  | 124 | 50  | 4690  |
| 17TH-09-01-42  | 0.000  | 31.7  | 0.07 | 1.12  | 2.20  | 0.36 | 10.9 | 4.0  | 49.3  | 20.1  | 93.5  | 20.7  | 213 | 39.8  | 153  | 102 | 79  | 3861  |
| 17TH-09-01-43  | 0.063  | 5.8   | 0.24 | 3.18  | 5.55  | 0.53 | 27.0 | 8.9  | 99.2  | 37.2  | 165.7 | 34.0  | 314 | 55.1  | 381  | 173 | 256 | 6504  |
| 17TH-09-01-45  | 0.040  | 28.2  | 0.57 | 5.63  | 6.44  | 1.64 | 34.0 | 12.4 | 163.1 | 64.0  | 307.5 | 65.4  | 646 | 118.5 | 1418 | 357 | 345 | 13472 |
| 17TH-09-01-47  | 0.046  | 11.6  | 0.12 | 1.35  | 3.62  | 0.40 | 23.2 | 8.5  | 104.3 | 38.7  | 186.3 | 40.3  | 388 | 67.9  | 113  | 60  | 77  | 2270  |
| 17TH-09-01-48  | 2.730  | 61.2  | 1.32 | 12.28 | 15.46 | 3.04 | 69.5 | 20.9 | 230.0 | 83.5  | 360.6 | 76.8  | 686 | 129.4 | 172  | 653 | 488 | 24621 |
| 17TH-09-01-51  | 0.006  | 23.5  | 0.09 | 1.18  | 4.84  | 1.36 | 29.0 | 9.6  | 131.4 | 52.0  | 242.4 | 55.8  | 534 | 104.3 | 239  | 117 | 131 | 4400  |
| 17TH-09-01-52  | 1.116  | 10.5  | 0.34 | 3.33  | 5.02  | 0.49 | 28.7 | 9.4  | 106.1 | 39.7  | 170.0 | 35.4  | 306 | 54.9  | 266  | 113 | 151 | 4240  |
| 17TH-09-01-55  | 0.363  | 110.2 | 0.77 | 7.05  | 8.40  | 2.19 | 48.1 | 17.3 | 216.0 | 82.9  | 379.6 | 77.1  | 682 | 121.9 | 558  | 339 | 185 | 12788 |
| 17TH-09-01-57  | 0.098  | 13.8  | 0.39 | 4.14  | 7.21  | 1.21 | 35.3 | 11.2 | 123.3 | 42.6  | 185.1 | 38.3  | 342 | 64.0  | 191  | 126 | 107 | 4734  |
| 17TH-09-01-58  | 0.000  | 27.0  | 0.17 | 3.52  | 5.45  | 1.30 | 29.5 | 9.1  | 107.9 | 40.1  | 174.0 | 36.5  | 341 | 63.4  | 99   | 74  | 48  | 2805  |
| 17TH-09-01-59  | 0.793  | 32.9  | 1.07 | 7.25  | 5.15  | 1.33 | 20.4 | 7.7  | 97.6  | 39.2  | 182.5 | 41.0  | 380 | 74.5  | 455  | 239 | 271 | 9006  |
| 17TH-09-01-62  | 0.000  | 7.8   | 0.18 | 3.77  | 7.58  | 0.60 | 44.0 | 14.5 | 177.3 | 63.5  | 272.5 | 56.6  | 508 | 90.6  | 128  | 88  | 71  | 3308  |
| 17TH-09-01-64  | 0.000  | 8.5   | 0.27 | 3.11  | 5.86  | 0.85 | 28.0 | 8.3  | 94.3  | 31.2  | 131.7 | 25.5  | 220 | 41.5  | 188  | 130 | 108 | 4895  |
| 17TH-09-01-67  | 0.105  | 39.3  | 0.22 | 1.46  | 2.36  | 0.85 | 17.2 | 6.6  | 85.9  | 36.4  | 183.7 | 43.2  | 440 | 93.0  | 213  | 128 | 174 | 4830  |
| 17TH-09-01-68  | 0.000  | 15.3  | 0.16 | 3.00  | 6.66  | 0.76 | 41.2 | 13.6 | 159.1 | 59.0  | 251.8 | 54.7  | 476 | 89.8  | 408  | 173 | 317 | 6511  |
| 17TH-09-01-69  | 0.138  | 6.4   | 0.40 | 4.02  | 6.92  | 2.04 | 15.5 | 2.1  | 9.8   | 1.7   | 4.3   | 0.6   | 4   | 0.8   | 227  | 80  | 391 | 2998  |
| 17TH-09-01-71  | 1.051  | 44.7  | 0.26 | 2.66  | 4.71  | 1.19 | 19.2 | 6.5  | 71.4  | 26.5  | 113.6 | 24.5  | 219 | 42.2  | 125  | 84  | 51  | 3167  |
| 17TH-09-01-73  | 0.122  | 13.4  | 0.28 | 3.64  | 4.57  | 0.41 | 22.8 | 7.6  | 87.2  | 31.5  | 136.0 | 27.7  | 239 | 45.4  | 405  | 279 | 279 | 10516 |
| 17TH-09-01-75  | 0.055  | 2.6   | 0.28 | 4.94  | 11.93 | 0.31 | 58.1 | 16.9 | 138.0 | 32.2  | 93.0  | 14.1  | 95  | 14.5  | 208  | 147 | 278 | 5538  |
| 17TH-09-01-76  | 0.000  | 30.3  | 0.05 | 0.97  | 1.96  | 0.23 | 10.2 | 3.9  | 53.4  | 21.9  | 108.2 | 24.1  | 243 | 48.1  | 170  | 78  | 83  | 2953  |
| 17TH-09-01-78  | 0.585  | 32.7  | 1.02 | 7.91  | 8.16  | 2.20 | 31.8 | 10.7 | 134.5 | 53.7  | 254.7 | 57.8  | 565 | 112.3 | 412  | 242 | 166 | 9111  |
| 17TH-09-01-80  | 0.191  | 3.6   | 0.29 | 3.04  | 7.30  | 0.62 | 35.7 | 11.9 | 123.2 | 36.3  | 129.5 | 22.2  | 170 | 28.1  | 178  | 110 | 167 | 4160  |
| 17TH-09-01-89  | 0.072  | 8.9   | 0.37 | 5.97  | 11.52 | 2.41 | 59.6 | 17.6 | 201.8 | 70.3  | 304.9 | 56.8  | 493 | 92.1  | 447  | 126 | 160 | 4744  |
| 17TH-09-01-90  | 0.106  | 6.5   | 0.39 | 4.28  | 7.08  | 0.76 | 50.5 | 20.0 | 269.7 | 110.7 | 517.6 | 111.0 | 961 | 184.7 | 326  | 168 | 241 | 6332  |
